# Supplementary material for: Nickel-catalyzed skeletal transformation of tropone derivatives via C–C bond activation: catalyst-controlled access to diverse ring systems
Source: Royal Society of Chemistry journal article supplement (doi:10.1039/d2sc01394k), 2022-01-01

## Supporting Information

for

### Nickel-Catalyzed Skeletal Transformation of Tropone Derivatives via C–C Bond Activation: Catalyst-Controlled Access to Diverse Ring Systems

Takuya Kodama,<sup>[a,b]</sup> Kanako Saito,<sup>[a]</sup> Mamoru Tobisu\*<sup>[a,b]</sup>

*Department of Applied Chemistry, Graduate School of Engineering, Osaka University, Suita, Osaka 561-0871, Japan  
Innovative Catalysis Science Division, Institute for Open and Transdisciplinary Research Initiatives (ICS-OTRI)*

*tobisu@chem.eng.osaka-u.ac.jp*

### CONTENTS

|             |                                                                                       |            |
|-------------|---------------------------------------------------------------------------------------|------------|
| <b>I</b>    | <b>General Information</b>                                                            | <b>S1</b>  |
| <b>II</b>   | <b>Materials</b>                                                                      | <b>S1</b>  |
| <b>III</b>  | <b>Synthesis of Starting Materials</b>                                                | <b>S2</b>  |
| <b>IV</b>   | <b>Optimization of Catalytic Decarbonylation Reaction</b>                             | <b>S5</b>  |
| <b>V</b>    | <b>Typical Procedure for Catalytic Decarbonylation Reaction</b>                       | <b>S6</b>  |
| <b>VI</b>   | <b>Typical Procedure for Catalytic Two-Carbon Ring Contraction Reaction</b>           | <b>S9</b>  |
| <b>VII</b>  | <b>Nickel-Mediated Decarbonylation under Ambient Temperature</b>                      | <b>S12</b> |
| <b>VIII</b> | <b>Mechanistic Studies</b>                                                            | <b>S13</b> |
|             | a. Effect of CO Ligand                                                                |            |
|             | b. Stoichiometric Experiment                                                          |            |
|             | c. Ketene Elimination from Ketene Complex                                             |            |
|             | d. Labelling Experiment                                                               |            |
|             | e. Role of Ni in the Cleavage of C–C bond in Nickel-Ketene Complex                    |            |
|             | f. Thermal Reaction of Phenylketene and Cyclopentadiene Derivatives                   |            |
|             | g. Retro [2+2] Reaction from Cyclobutanone Derivatives to Cyclopentadiene Derivatives |            |
|             | h. Thermal Reaction of Phenylketene and Ethanol                                       |            |
| <b>IX</b>   | <b>DFT Calculations</b>                                                               | <b>S24</b> |
|             | a. Distortion/Interaction Analysis.                                                   |            |
|             | b. Computed Energy Profiles                                                           |            |
| <b>X</b>    | <b>Crystallographic Information</b>                                                   | <b>S28</b> |
| <b>XI</b>   | <b>Cartesian Coordinates and Energies of Optimized Structures</b>                     | <b>S31</b> |
| <b>XII</b>  | <b>Reference</b>                                                                      | <b>S98</b> |
| <b>XIII</b> | <b>Copies of NMR spectra</b>                                                          | <b>S98</b> |

## I. General Information

$^1\text{H}$  NMR,  $^{13}\text{C}$  NMR,  $^{19}\text{F}$  NMR,  $^{31}\text{P}$  NMR and  $^2\text{H}$  NMR spectra were recorded on a JEOL ECS-400 spectrometer in  $\text{CDCl}_3$ ,  $\text{THF-}d_8$ , toluene- $d_8$  or  $(\text{CD}_3)_2\text{CO}$ . The chemical shifts in  $^1\text{H}$  NMR spectra were recorded relative to  $\text{CDCl}_3$  ( $\delta$  7.26),  $\text{THF-}d_8$  ( $\delta$  3.58), toluene- $d_8$  ( $\delta$  2.08) or  $(\text{CD}_3)_2\text{CO}$  ( $\delta$  2.05). The chemical shifts in  $^{13}\text{C}$  NMR spectra were recorded relative to  $\text{CDCl}_3$  ( $\delta$  77.16),  $\text{THF-}d_8$  ( $\delta$  67.21), toluene- $d_8$  ( $\delta$  20.43) or  $(\text{CD}_3)_2\text{CO}$  ( $\delta$  29.84). The chemical shifts in  $^{19}\text{F}$  NMR spectra were recorded relative to benzotrifluoride ( $\delta$  -65.64). The data is reported as follows: chemical shift ( $\delta$ ) in ppm, multiplicity (s = singlet, d = doublet, t = triplet, q = quartet, and m = multiplet), coupling constant (Hz), and integration. Infrared spectra (IR) were obtained using a JASCO FT/IR-4200 spectrometer. Absorption is reported in reciprocal centimeters ( $\text{cm}^{-1}$ ) with the following relative intensities: s (strong), m (medium), or w (weak). High resolution mass spectra (HRMS) were obtained using JEOL-700 or JMS-T100LP spectrometer. Melting points were determined using a Yamato melting point apparatus. Column chromatography was performed with Biotage Isolera<sup>®</sup> equipped with Biotage SNAP Ultra Cartridge. Data collection for X-ray crystal analysis were performed on a Rigaku/XtaLAB Pro P200 Hybrid Photon Counting diffractometer (Cu-K $\alpha$ ,  $\lambda$  = 1.54184 Å). The structures were solved with direct methods and refined with full-matrix least squares. All calculations were conducted using a Gaussian 09 suite program (G09 Rev D.01).<sup>1</sup> Optimization was performed at the M06-2X/6-31G(d,p)+LanL2DZ level of theory.<sup>2</sup> Harmonic vibration frequency analysis was conducted with the optimized structures at the same level of theory to verify all stationary points as local minima (with no imaginary frequency). Each reported minimum has zero imaginary frequency and each transition state (TS) structure has only one imaginary frequency.

## II. Materials

Toluene (for Organic Synth.) was purchased from Wako Chemicals and used as received.  $\text{Ni}(\text{cod})_2$  was purchased from Strem Chemicals and used as received.  $\text{PCy}_3$  (Sigma-Aldrich),  $\text{dcype}$  (Sigma-Aldrich),  $\text{IPr}\cdot\text{HCl}$  (TCI),  $\text{IMes}\cdot\text{HCl}$  (TCI),  $\text{ICy}\cdot\text{HBF}_4$  (TCI), Tropone (Sigma-Aldrich) and dibenzosuberone (TCI) were purchased from commercial suppliers and used as received.  $\text{IMes}^{\text{Me}}\cdot\text{HCl}^3$  was prepared according to the literature procedures. 4,5-fused tropone derivatives **1a** [CAS:1154-38-7]<sup>4</sup>, **1c** [CAS:38558-34-8]<sup>5</sup>, **1e** [CAS:57969-70-7]<sup>6</sup>, **1h** [CAS:2707422-85-1]<sup>7</sup>, **1i** [CAS:2568057-82-7]<sup>8</sup>, were prepared according to the literature procedure.

### III. Synthesis of Starting Materials

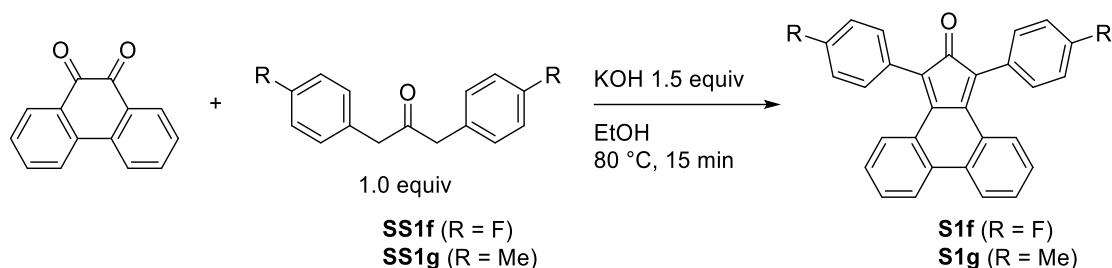

#### General procedure I. Synthesis of 2,5-diaryl-3,4-phenanthrene-fused cyclopentadienone **S1f**, **S1g**.

An ethanol solution of KOH (22 mmol, 1.5 equiv) was added to a mixture of 1,3-diarylacetone (15 mmol, 1.0 equiv) and phenanthrene-9,10-dione (15 mmol, 1.0 equiv) in ethanol (100 mL) at room temperature. The reaction mixture was stirred at 80 °C for 15 min. After cooling to 0 °C, the resulting solid was isolated on a filter and washed with cold ethanol.

#### 1,3-Bis(4-fluorophenyl)-2H-cyclopenta[*l*]phenanthren-2-one (**S1f**).

green solid (42%). Mp 243–246 °C  $R_f$  0.36 (SiO<sub>2</sub>, hexane/CHCl<sub>3</sub> = 1/1 (v/v)).

<sup>1</sup>H NMR (CDCl<sub>3</sub>, 399.78 MHz)  $\delta$ : 7.81 (dd,  $J$  = 8.2, 0.80 Hz, 2H), 7.51 (dd,  $J$  = 8.0, 1.1 Hz, 2H), 7.37 (qd,  $J$  = 5.6, 3.0 Hz, 4H), 7.32–7.28 (m, 2H), 7.13 (td,  $J$  = 9.0, 1.6 Hz, 4H), 6.99–6.95 (m, 2H).

<sup>13</sup>C{<sup>1</sup>H} NMR (CDCl<sub>3</sub>, 100.53 MHz)  $\delta$ : 200.2, 162.8 (d,  $J^{C-F}$  = 248 Hz), 148.5, 133.7, 131.9 (d,  $J^{C-F}$  = 8.6 Hz), 131.8, 129.0, 128.5, 128.4, 128.1, 124.7, 122.2, 116.0 (d,  $J^{C-F}$  = 22 Hz).

<sup>19</sup>F NMR (CDCl<sub>3</sub>, 376.17 MHz)  $\delta$ : -116.1.

IR (KBr, cm<sup>-1</sup>): 1686 s, 1597 m, 1583 w, 1577 w, 1507 s, 1482 w, 1448 m, 1347 m, 1305 m, 1225 s, 1155 m, 1105 w, 1100 w, 1097 w, 976 w, 853 w, 833 m, 825 w, 820 w, 764 m, 724 w, 569 w, 528 m.

HRMS (DART+TOF)  $m/z$ : [M+H]<sup>+</sup> Calcd for C<sub>29</sub>H<sub>17</sub>OF<sub>2</sub> 419.1242; Found 419.1244.

#### 1,3-Di-*p*-tolyl-2H-cyclopenta[*l*]phenanthren-2-one (**S1g**).

green solid (70%). Mp 242–248 °C  $R_f$  0.36 (SiO<sub>2</sub>, hexane/CHCl<sub>3</sub> = 1/1 (v/v)).

<sup>1</sup>H NMR (CDCl<sub>3</sub>, 399.78 MHz)  $\delta$ : 7.80 (dd,  $J$  = 7.5 Hz, 1.5 Hz, 2H), 7.60 (dd,  $J$  = 8.0 Hz, 1.1 Hz, 2H), 7.30–7.22 (m, 10H), 6.95 (td,  $J$  = 7.6 Hz, 1.1 Hz, 2H), 2.40 (s, 6H).

<sup>13</sup>C{<sup>1</sup>H} NMR (CDCl<sub>3</sub>, 100.53 MHz)  $\delta$ : 200.7, 147.9, 138.1, 133.7, 131.3, 130.0, 129.5, 129.3, 129.1, 128.9, 128.3, 124.5, 123.2, 21.6.

IR (KBr, cm<sup>-1</sup>): 1695 s, 1594 m, 1509 m, 1447 m, 1347 m, 1302 m, 1182 m, 1106 m, 974 m, 838 w, 810 m, 768 m, 764 m, 756 s, 725 m, 653 w, 572 w, 524 m, 497 w, 446 w, 431 w, 415 m.

HRMS (DART+TOF)  $m/z$ : [M+H]<sup>+</sup> Calcd for C<sub>31</sub>H<sub>23</sub>O 411.1743; Found 411.1747.

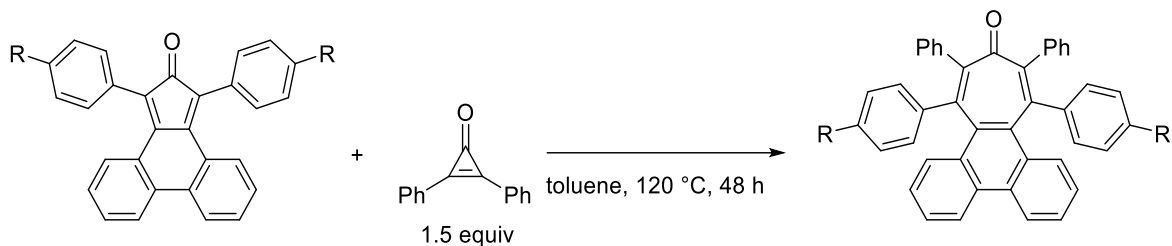

**General procedure II. Synthesis of Tropone Derivatives 1f, 1g.** A mixture of phencyclone **S1** (3.0 mmol, 1.0 equiv) and diphenylcyclopropanone (4.5 mmol, 1.5 equiv) in toluene (25 mL) was stirred at 120 °C under a nitrogen atmosphere for 48 h. The solvent was removed under reduced pressure and the resulting crude product was purified by silica gel column chromatography to give the desired product.

**9,13-Bis(4-fluorophenyl)-10,12-diphenyl-11*H*-cyclohepta[*l*]phenanthren-11-one (1f).**

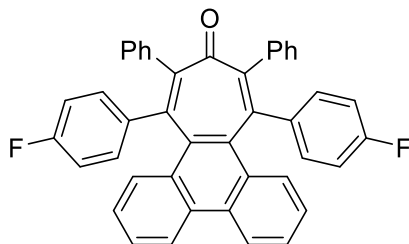

Colorless solid (40%). Mp 271–272 °C  $R_f$  0.40 (SiO<sub>2</sub>, hexane/CH<sub>2</sub>Cl<sub>2</sub> = 1/1 (v/v)).

<sup>1</sup>H NMR (CDCl<sub>3</sub>, 399.78 MHz)  $\delta$ : 8.60 (d,  $J$  = 8.2 Hz, 2H), 7.85 (d,  $J$  = 7.8 Hz, 2H), 7.48 (t,  $J$  = 6.8 Hz, 2H), 7.22 (t,  $J$  = 7.1 Hz, 2H), 7.14 (dd,  $J$  = 7.6, 1.6 Hz, 4H), 7.00–7.06 (m, 10H), 6.82 (t,  $J$  = 8.7 Hz, 4H).

<sup>13</sup>C {<sup>1</sup>H} NMR (CDCl<sub>3</sub>, 100.53 MHz)  $\delta$ : 199.4, 161.7 (d,  $J^{C-F}$  = 248 Hz), 146.2, 136.6, 135.5, 133.8, 133.3, 132.0 (d,  $J^{C-F}$  = 8.6 Hz), 131.1, 130.6, 129.6, 129.5, 128.2, 128.0, 127.0, 126.1, 122.5, 115.5 (d,  $J^{C-F}$  = 22.0 Hz)

<sup>19</sup>F NMR (CDCl<sub>3</sub>, 376.17 MHz)  $\delta$ : -116.9.

IR (KBr, cm<sup>-1</sup>): 3076 m, 3052 m, 1708 s, 1601 s, 1506 s, 1496 m, 1491 s, 1440 s, 1263 m, 1232 s, 1159 s, 1099 m, 1076 m, 838 s, 828 m, 820 s, 799 m, 773 s, 751 s, 742 m, 731 s, 725 m, 719 s, 700 s, 554 s, 501 m.

HRMS (DART+TOF)  $m/z$ : [M+H]<sup>+</sup> Calcd for C<sub>43</sub>H<sub>27</sub>OF<sub>2</sub> 597.2024; Found 597.2024.

**10,12-Diphenyl-9,13-di-p-tolyl-11H-cyclohepta[*l*]phenanthren-11-one (1g).**

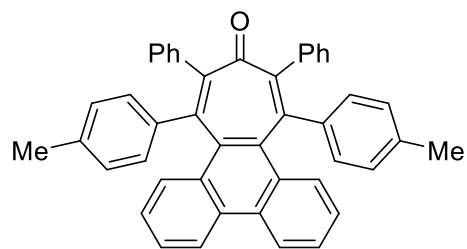

Colorless solid (11%). Mp 244–247 °C  $R_f$  0.14 (SiO<sub>2</sub>, hexane/CHCl<sub>3</sub> = 7/13 (v/v)).

<sup>1</sup>H NMR (CDCl<sub>3</sub>, 399.78 MHz)  $\delta$ : 8.59 (d,  $J$  = 8.2 Hz, 2H), 7.93 (d,  $J$  = 8.2 Hz, 2H), 7.47 (t,  $J$  = 7.8 Hz, 2H), 7.20 (t,  $J$  = 7.6 Hz, 2H), 7.16–7.14 (m, 4H), 7.04–6.97 (m, 10H), 6.92 (d,  $J$  = 8.2 Hz, 4H), 2.25 (s, 6H).

<sup>13</sup>C{<sup>1</sup>H} NMR (CDCl<sub>3</sub>, 100.53 MHz)  $\delta$ : 200.2, 145.9, 137.6, 137.0, 135.7, 134.9, 133.9, 131.0, 130.7, 130.3, 129.9, 129.7, 129.0, 128.0, 127.6, 126.7, 125.9, 122.4, 21.4.

IR (KBr, cm<sup>-1</sup>): 3022 w, 1739 m, 1732 m, 1720 s, 1509 m, 1591 m, 1443 m, 1264 m, 1240 m, 1075 m, 827 m, 811 m, 761 s, 752 m, 748 m, 732 m, 726 m, 722 m, 701 s, 697 s, 694 s, 564 m.

HRMS (DART+TOF)  $m/z$ : [M+H]<sup>+</sup> Calcd for C<sub>45</sub>H<sub>33</sub>O 589.2526; Found 589.2529.

#### IV. Optimization of Catalytic Decarbonylation Reaction.

**Table S1.** Development of the Nickel-Mediated Decarbonylation of Tropone **1e**.<sup>a</sup>

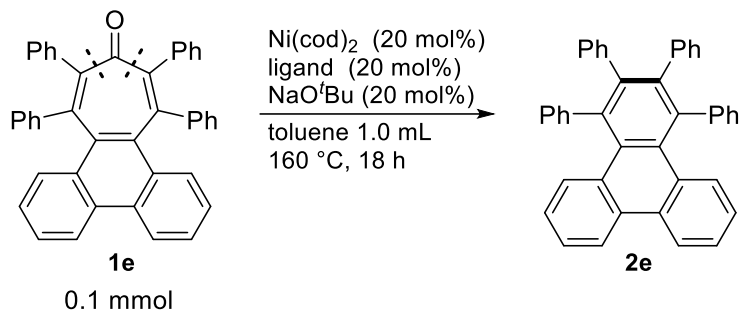

| entry          | ligand                                    | Isolated yields (%) |                    |
|----------------|-------------------------------------------|---------------------|--------------------|
|                |                                           | <b>2e</b>           | <b>1e</b>          |
| 1              | IMes <sup>Me</sup> ·HCl                   | 93(49) <sup>b</sup> | 4(40) <sup>b</sup> |
| 2 <sup>c</sup> | IMes <sup>Me</sup> ·HCl                   | 59                  | 30                 |
| 3              | ICy·HBF <sub>4</sub>                      | 26                  | 60                 |
| 4              | IMes·HCl                                  | 40                  | 50                 |
| 5              | IPr·HCl                                   | 53                  | 33                 |
| 6              | PCy <sub>3</sub> (no NaO <sup>t</sup> Bu) | 30                  | 54                 |
| 7 <sup>d</sup> | dcype (no NaO <sup>t</sup> Bu)            | 20                  | 67                 |

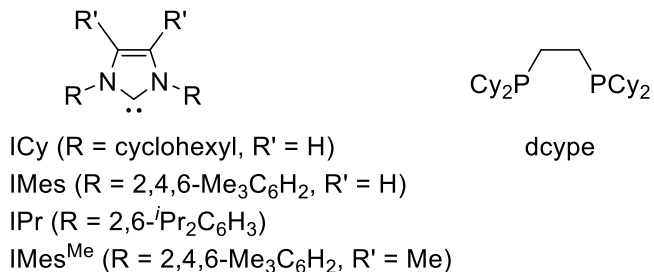

<sup>a</sup>Reaction condition : **1e** (0.10 mmol), Ni(cod)<sub>2</sub> (0.020 mmol), ligand (0.020 mmol), NaO<sup>t</sup>Bu (0.020 mmol), toluene (1.0 mL), 160 °C for 18 h. <sup>b</sup>**1e** (0.10 mmol), Ni(cod)<sub>2</sub> (0.010 mmol), NaO<sup>t</sup>Bu (0.010 mmol), ligand (0.010 mmol), toluene (1.0 mL), 160 °C for 18 h. <sup>c</sup>**1e** (0.10 mmol), Ni(cod)<sub>2</sub> (0.020 mmol), ligand (0.040 mmol), NaO<sup>t</sup>Bu (0.040 mmol), toluene (1.0 mL), 160 °C for 18 h. <sup>d</sup>NMR yields.

## V. Typical Procedures for Catalytic Decarbonylation Reaction.

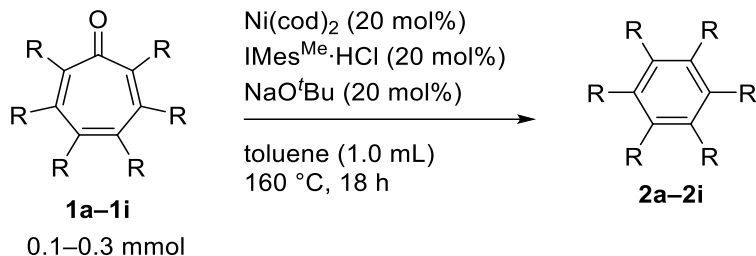

**General procedure III. Decarbonylation of Tropone Derivatives 1e–1i.** In a glovebox filled with nitrogen,  $\text{Ni}(\text{cod})_2$  (5.5 mg, 0.020 mmol),  $\text{IMes}^{\text{Me}}\cdot\text{HCl}$  (7.4 mg, 0.020 mmol),  $\text{NaO}^t\text{Bu}$  (1.9 mg, 0.020 mmol) and toluene (0.5 mL) were added to a 10 mL pressure-proof vial with a Teflon-sealed screwcap, and stirred for 10 min at room temperature. **1e** (56 mg, 0.10 mmol) and toluene (0.5 mL) were then added, and the cap was applied to seal the vial. The vessel was heated at  $160\text{ }^\circ\text{C}$  (aluminum heating block) for 18 h. The reaction mixture was cooled to room temperature, and the crude mixture was filtered through a pad of silica gel. The filtrate was then concentrated *in vacuo* to give a residue, which was purified by flash column chromatography over silica gel.

### 1,2,3,4-Tetraphenyltriphenylene (**2e**). [CAS: 36262-81-4]

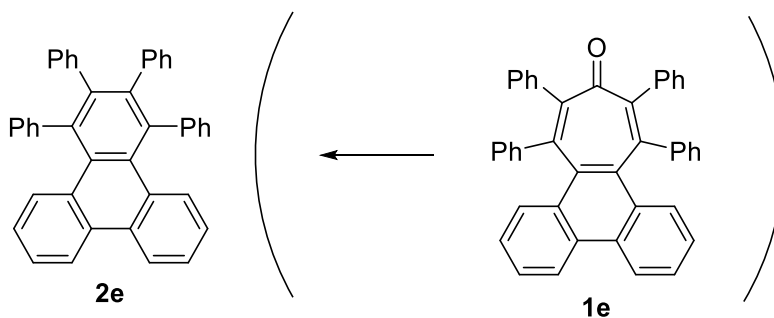

Colorless solid (50 mg, 93%).  $R_f$  0.30 ( $\text{SiO}_2$ , hexane/ $\text{CHCl}_3$  = 3/1 (v/v)).

$^1\text{H}$  NMR ( $\text{CDCl}_3$ , 399.78 MHz)  $\delta$ : 8.43 (d,  $J$  = 8.2 Hz, 2H), 7.60 (d,  $J$  = 8.7 Hz, 2H), 7.43–7.39 (m, 2H), 7.14–7.00 (m, 12H), 6.95–6.83 (m, 6H), 6.74–6.70 (m, 4H).

$^{13}\text{C}\{^1\text{H}\}$  NMR ( $\text{CDCl}_3$ , 100.53 MHz)  $\delta$ : 142.9, 140.5, 140.4, 137.2, 132.2, 131.7 (2 peaks are overlapped), 131.3, 130.9, 130.1, 128.1, 126.7, 126.5, 126.3, 125.6, 125.4, 123.3.

HRMS (DART+TOF)  $m/z$ :  $[\text{M}+\text{H}]^+$  Calcd for  $\text{C}_{42}\text{H}_{29}$  533.2264; Found 533.2260.

**1,4-Bis(4-fluorophenyl)-2,3-diphenyltriphenylene (2f).**

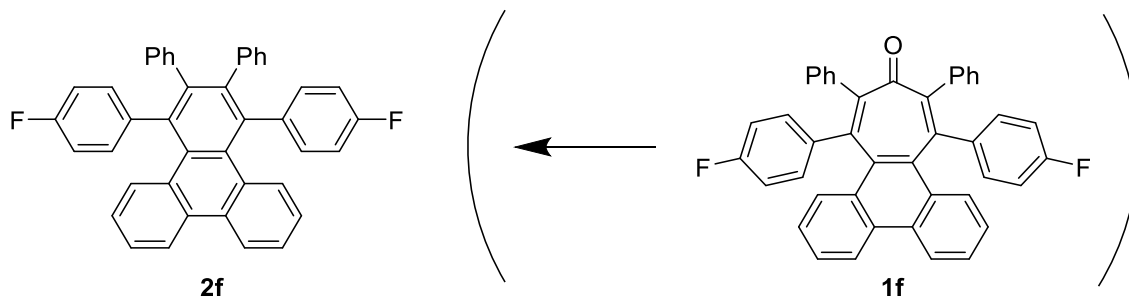

Colorless solid (59 mg, >99%). Mp 294–298 °C  $R_f$  0.57 (SiO<sub>2</sub>, hexane/CHCl<sub>3</sub> = 1/1 (v/v)).

<sup>1</sup>H NMR (CDCl<sub>3</sub>, 399.78 MHz)  $\delta$ : 8.43 (d,  $J$  = 7.3 Hz, 2H), 7.55–7.53 (m, 2H), 7.44–7.40 (m, 2H), 7.09–7.04 (m, 2H), 7.02–6.96 (m, 4H), 6.94–6.89 (m, 6H), 6.82–6.77 (m, 4H), 6.68–6.66 (m, 4H).

<sup>13</sup>C {<sup>1</sup>H} NMR (CDCl<sub>3</sub>, 100.53 MHz)  $\delta$ : 161.2 (d,  $J^{C-F}$  = 247 Hz), 140.6, 140.2, 138.9, 138.8, 136.3, 133.7 (d,  $J^{C-F}$  = 7.6 Hz), 131.7, 131.6, 131.4, 130.6, 130.0, 127.0, 126.7, 125.8, 125.6, 123.5, 115.2 (d,  $J^{C-F}$  = 21.0 Hz).

<sup>19</sup>F NMR (CDCl<sub>3</sub>, 376.17 MHz)  $\delta$ : -118.5.

IR (KBr, cm<sup>-1</sup>): 3053 w, 3026 w, 2926 w, 1601 s, 1509 s, 1440 m, 1392 m, 1224 s, 1157 m, 1143 w, 840 s, 821 m, 796 w, 760 m, 750 m, 728 m, 700 s, 560 m, 529 m.

HRMS (DART+TOF)  $m/z$ : [M+H]<sup>+</sup> Calcd for C<sub>42</sub>H<sub>27</sub>F<sub>2</sub> 569.2075; Found 569.2052.

**2,3-Diphenyl-1,4-di-*p*-tolyltriphenylene (2g).**

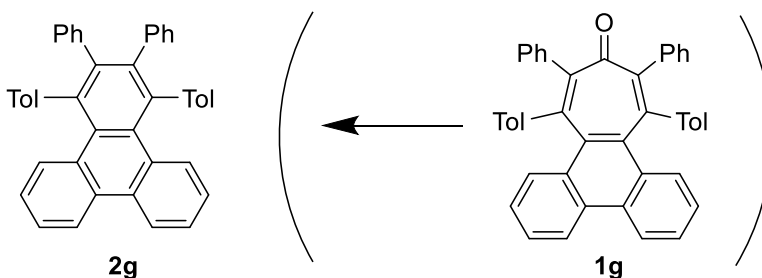

Colorless solid (28 mg, 75%). Mp 314–320 °C  $R_f$  0.37 (SiO<sub>2</sub>, hexane/CHCl<sub>3</sub> = 1/1 (v/v)).

<sup>1</sup>H NMR (CDCl<sub>3</sub>, 399.78 MHz)  $\delta$ : 8.41 (d,  $J$  = 7.3 Hz, 2H), 7.61 (dd,  $J$  = 8.7, 0.90 Hz, 2H), 7.41–7.37 (m, 2H), 7.05–7.00 (m, 2H), 6.94–6.87 (m, 14H), 6.71–6.69 (m, 4H), 2.26 (s, 6H).

<sup>13</sup>C {<sup>1</sup>H} NMR (CDCl<sub>3</sub>, 100.53 MHz)  $\delta$ : 141.8, 141.6, 132.7, 131.2, 131.1, 130.7, 129.3, 128.8, 128.7, 127.9, 127.7, 127.2, 126.7, 126.5, 126.2, 126.1, 123.6, 24.3.

IR (KBr, cm<sup>-1</sup>): 3080 w, 3073 w, 3060 m, 3039 w, 3022 m, 2919 w, 1717 w, 1511 m, 1493 m, 1440 m, 1110 w, 839 w, 827 m, 758 s, 748 m, 742 m, 736 w, 726 s, 700 s, 560 m.

HRMS (DART+TOF)  $m/z$ : [M+H]<sup>+</sup> Calcd for C<sub>44</sub>H<sub>33</sub> 561.2577; Found 561.2574.



### 2,3-Bis(4-(*tert*-butyl)phenyl)triphenylene (**2h**).

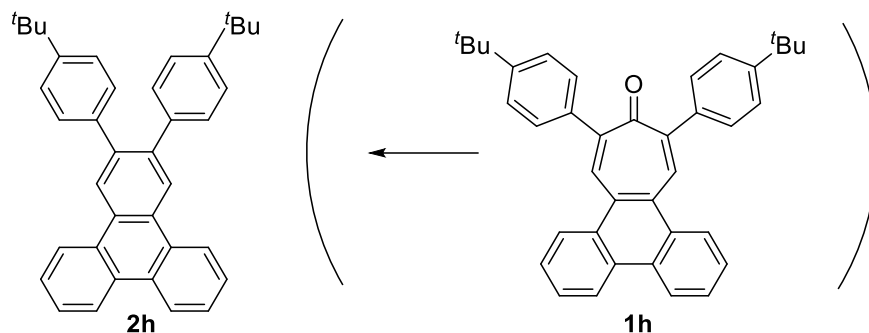

Colorless solid (3.0 mg, 6%). Mp 267–268 °C  $R_f$  0.60 (SiO<sub>2</sub>, hexane/CHCl<sub>3</sub> = 1/1 (v/v)).

<sup>1</sup>H NMR (CDCl<sub>3</sub>, 399.78 MHz)  $\delta$ : 8.69–8.65 (m, 6H), 7.68–7.58 (m, 4H), 7.31 (d,  $J$  = 8.2 Hz, 4H), 7.25 (d,  $J$  = 4.6 Hz, 4H), 1.29 (s, 18H).

<sup>13</sup>C {<sup>1</sup>H} NMR (CDCl<sub>3</sub>, 100.53 MHz)  $\delta$ : 149.7, 139.9, 138.8, 130.1, 129.8 (two peaks are overlapped), 128.9, 127.4, 127.3, 125.6, 125.0, 123.6, 123.5, 34.6, 31.5.

IR (KBr, cm<sup>-1</sup>): 2960 s, 2914 w, 2901 m, 2884 w, 2864 w, 1484 m, 1469 w, 1458 w, 1447 w, 1436 m, 1390 m, 1361 w, 1268 w, 1116 w, 891 w, 835 m, 755 s, 720 m, 624 w.

HRMS (DART+TOF)  $m/z$ : [M+H]<sup>+</sup> Calcd for C<sub>38</sub>H<sub>37</sub> 493.2890; Found 493.2888.

### 7,8,9,10-Tetraphenylfluoranthene (**2i**). [CAS: 13238-75-0]

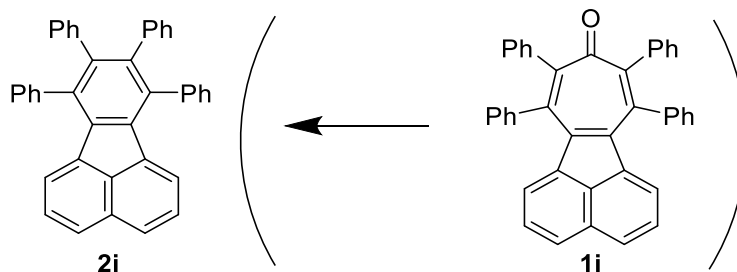

Colorless solid (50 mg, 97%). Mp 325–326 °C  $R_f$  0.50 (SiO<sub>2</sub>, hexane/CHCl<sub>3</sub> = 3/1 (v/v)).

<sup>1</sup>H NMR (CDCl<sub>3</sub>, 399.78 MHz)  $\delta$ : 7.73 (d,  $J$  = 8.2 Hz, 2H), 7.35–7.29 (m, 12H), 6.96–6.85 (m, 10H), 6.64 (d,  $J$  = 6.8 Hz, 2H).

<sup>13</sup>C {<sup>1</sup>H} NMR (CDCl<sub>3</sub>, 100.53 MHz)  $\delta$ : 140.7, 139.9, 139.8, 137.2, 136.6, 136.5, 133.3, 131.4, 130.2, 129.7, 128.2, 127.7, 127.0, 126.7, 126.6, 125.5, 123.3.

IR (KBr, cm<sup>-1</sup>): 3057 w, 3039 w, 3028 w, 1600 w, 1496 w, 1440 w, 1436 w, 1428 m, 1421 m, 1417 w, 1375 w, 1070 w, 1039 w, 1028 w, 826 w, 774 m, 770 m, 765 m, 747 w, 741 w, 708 m, 706 m, 699 s, 578 w, 552 w.

HRMS (DART+TOF)  $m/z$ : [M+H]<sup>+</sup> Calcd for C<sub>40</sub>H<sub>27</sub> 507.2107; Found 507.2099.

## VI. Typical Procedures for Catalytic Two-Carbon Ring Contraction Reaction.

### 1,2,3-Triphenyl-1*H*-cyclopenta[*l*]phenanthrene (**3e**).

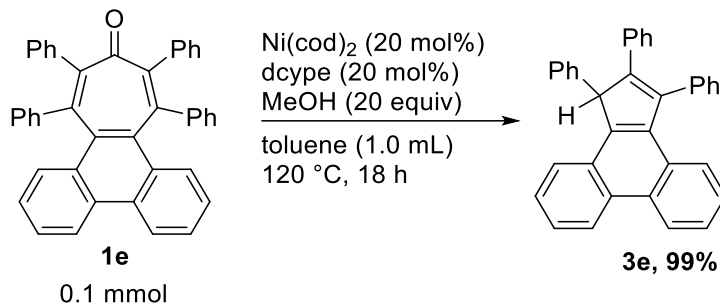

In a glovebox filled with nitrogen, Ni(cod)<sub>2</sub> (5.8 mg, 0.021 mmol), dcype (8.9 mg, 0.020 mmol), MeOH (80  $\mu$ L), **1e** (60 mg, 0.11 mmol) and toluene (1.0 mL) were added to a 10 mL pressure-proof vial with a Teflon-sealed screwcap and the cap was closed. The contents of the vial were then stirred at 120 °C (aluminum heating block) for 18 h. The reaction mixture was cooled to room temperature, and the crude mixture was filtered through a pad of silica gel. The filtrate was then concentrated in vacuo to give a residue, which was purified by flash column chromatography over silica gel to give **3e** as a colorless solid (46 mg, >99%).

R<sub>f</sub> 0.54 (SiO<sub>2</sub>, hexane/CHCl<sub>3</sub> = 2/1 (v/v)).

<sup>1</sup>H NMR ((CD<sub>3</sub>)<sub>2</sub>CO, 399.78 MHz)  $\delta$ : 8.87 (d, *J* = 7.8 Hz, 1H), 8.80 (d, *J* = 8.7 Hz, 1H), 7.99–7.94 (m, 1H), 7.78 (d, *J* = 7.8 Hz, 1H), 7.62–7.37 (m, 7H), 7.30–7.18 (m, 6H), 7.12 (t, *J* = 7.6 Hz, 2H), 7.07–6.98 (m, 4H), 5.78 (s, 1H).

<sup>13</sup>C{<sup>1</sup>H} NMR ((CD<sub>3</sub>)<sub>2</sub>CO, 100.53 MHz)  $\delta$ : 151.4, 144.1, 141.8, 140.8, 139.5, 136.4, 132.3, 131.9, 130.4, 130.3, 130.1, 129.9, 129.4, 129.4, 129.3, 129.1, 128.5, 128.4, 127.5, 127.4, 127.4, 126.7, 126.6, 126.5, 125.7, 125.4, 124.4, 124.2, 58.6.

HRMS (DART+TOF) *m/z*: [M+H]<sup>+</sup> Calcd for C<sub>35</sub>H<sub>25</sub> 445.1951; Found 445.1944.

### 8c,9,10a,11-Tetraphenyl-8c,9,10a,11-tetrahydro-10*H*-cyclobuta[3,4]cyclopenta[1,2-*l*]phenanthren-10-one (**5e**).

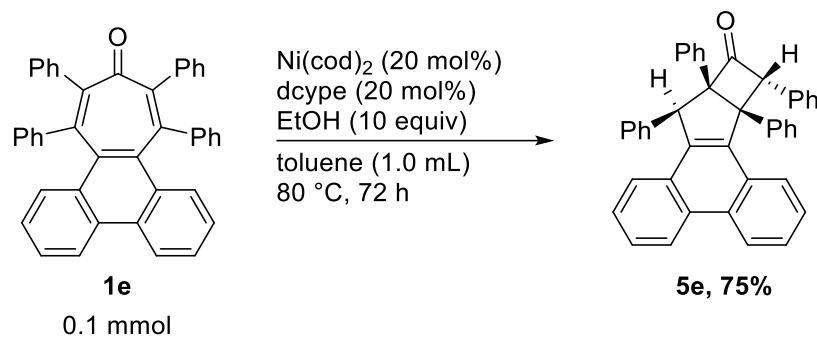

In a glovebox filled with nitrogen,  $\text{Ni(cod)}_2$  (5.6 mg, 0.020 mmol), dcype (9.2 mg, 0.020 mmol), EtOH (58  $\mu\text{L}$ ), **1e** (55 mg, 0.10 mmol) and toluene (1.0 mL) were added to a 10 mL pressure-proof vial with a Teflon-sealed screwcap and the cap was closed. The contents of the vial were then stirred at 80 °C (aluminum heating block) for 3 days. The reaction mixture was cooled to room temperature, and the crude mixture was filtered through a pad of silica gel. The filtrate was then concentrated in vacuo to give a residue, which was purified by flash column chromatography over silica gel to give **6e** as a colorless solid (42 mg, 75%).

Mp 236–237 °C  $R_f$  0.22 (SiO<sub>2</sub>, hexane/ $\text{CHCl}_3$  = 2/1 (v/v)).

<sup>1</sup>H NMR ( $\text{CDCl}_3$ , 399.78 MHz)  $\delta$ : 8.73 (d,  $J$  = 8.2 Hz, 1H), 8.59 (d,  $J$  = 8.7 Hz, 1H), 7.65 (t,  $J$  = 8.5 Hz, 2H), 7.48–7.43 (m, 2H), 7.30 (t,  $J$  = 8.0 Hz, 3H), 7.21 (t,  $J$  = 7.1 Hz, 1H), 7.14 (t,  $J$  = 7.6 Hz, 1H), 7.04–6.91 (m, 5H), 6.84 (t,  $J$  = 7.8 Hz, 2H), 6.80–6.72 (m, 4H), 6.67–6.60 (m, 3H), 6.52 (d,  $J$  = 8.2 Hz, 1H), 6.29 (m, 2H), 5.82 (s, 1H), 5.60 (s, 1H).

<sup>13</sup>C{<sup>1</sup>H} NMR ( $\text{CDCl}_3$ , 100.53 MHz)  $\delta$ : 209.7, 140.6, 139.7, 139.3, 138.2, 133.0, 131.7, 131.1, 130.4, 129.8, 129.7, 129.5, 129.5, 129.3, 128.6, 128.5, 128.3, 128.0, 127.9, 127.8, 127.7, 127.5, 127.3, 126.9, 126.9, 126.8, 126.5, 125.7, 125.1, 123.2, 122.4, 85.0, 69.8, 66.6, 57.3.

IR (KBr,  $\text{cm}^{-1}$ ): 3080 m, 3059 m, 3055 m, 3050 m, 3043 w, 3028 m, 1770 s, 1597 w, 1495 m, 1450 m, 1174 w, 1132 m, 1032 w, 777 m, 772 m, 755 s, 742 w, 734 m, 726 m, 724 m, 699 s, 556 m, 539 m, 510 w.  
 HRMS (DART+TOF)  $m/z$ :  $[\text{M}+\text{H}]^+$  Calcd for  $\text{C}_{43}\text{H}_{31}\text{O}$  563.2369; Found 563.2345.

The structure of **6e** was unambiguously determined by X-ray crystallography.

**Ethyl 2-phenyl-2-(1,2,3-triphenyl-1H-cyclopenta[*l*]phenanthren-1-yl)acetate (7e).**

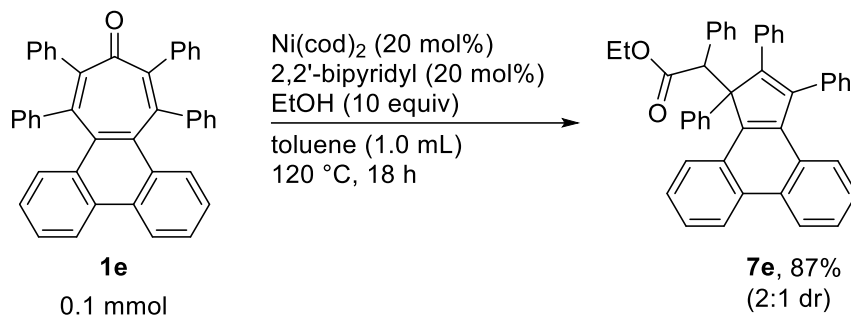

In a glovebox filled with nitrogen,  $\text{Ni}(\text{cod})_2$  (5.5 mg, 0.020 mmol), 2,2'-bipyridyl (3.2 mg, 0.020 mmol), EtOH (58  $\mu\text{L}$ ), **1e** (56 mg, 0.10 mmol) and toluene (1.0 mL) were added to a 10 mL pressure-proof vial with a Teflon-sealed screwcap and the cap was closed. The contents of the vial were then stirred at 120 °C (aluminum heating block) for 18 h. The reaction mixture was cooled to room temperature, and the crude mixture was filtered through a pad of silica gel. The filtrate was then concentrated in vacuo to give a residue, which was purified by flash column chromatography over silica gel to give **7e** as a colorless solid (53 mg, 87%).

Mp 243–247 °C  $R_f$  0.26 (SiO<sub>2</sub>, hexane/CHCl<sub>3</sub> = 1/1 (v/v)).

<sup>1</sup>H NMR (CDCl<sub>3</sub>, 399.78 MHz) major  $\delta$ : 8.65 (dd,  $J$  = 8.6, 2.9 Hz, 2H), 7.60 (d,  $J$  = 8.2 Hz, 1H), 7.52–7.45 (m, 3H), 7.36–7.21 (m, 10H), 7.15 (t,  $J$  = 7.6 Hz, 1H), 7.04–6.88 (m, 8H), 6.80 (t,  $J$  = 7.8 Hz, 2H), 6.69 (d,  $J$  = 7.8 Hz, 2H), 5.41 (s, 1H), 3.78–3.70 (m, 1H), 3.63–3.55 (m, 1H), 0.96 (t,  $J$  = 7.1 Hz, 3H).

<sup>13</sup>C {<sup>1</sup>H} NMR (CDCl<sub>3</sub>, 100.53 MHz)  $\delta$ : 171.3, 151.7, 145.5, 145.3, 139.8, 138.6, 138.2, 136.8, 134.5, 131.4, 130.8, 130.4, 130.1, 129.8, 129.5, 128.9, 128.4, 128.2, 127.9, 127.6, 127.4, 127.3, 127.1, 126.9, 126.8, 126.4, 126.0, 125.8, 125.7, 125.5, 125.2, 123.4, 123.2, 67.6, 60.9, 54.8, 13.8.

IR (KBr, cm<sup>-1</sup>): 1733 s, 1493 m, 1487 m, 1483 m, 1453 m, 1449 w, 1441 m, 1369 m, 1192 m, 1146 s, 1112 m, 1045 w, 1031 m, 783 w, 756 s, 745 m, 738 m, 732 m, 722 s, 717 m, 710 s, 543 m.

HRMS (DART+TOF)  $m/z$ :  $[\text{M}+\text{H}]^+$  Calcd for C<sub>45</sub>H<sub>35</sub>O<sub>2</sub> 607.2632; Found 607.3633.

The structure of **5e** was unambiguously determined by X-ray crystallography.

## VII. Nickel-Mediated Decarbonylation under Ambient Temperature.

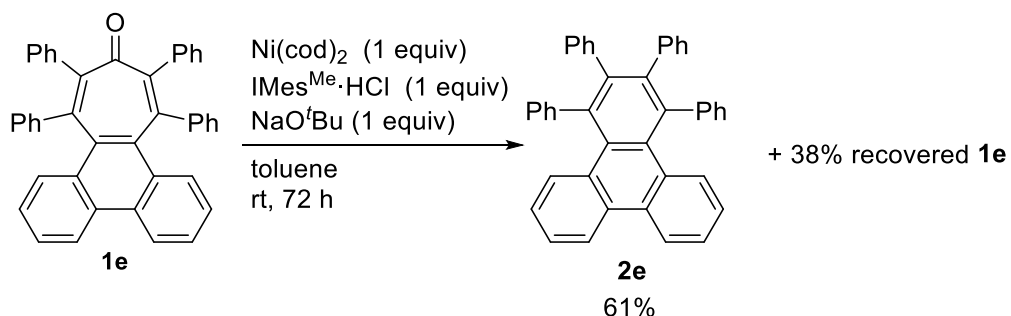

In a glovebox filled with nitrogen, Ni(cod)<sub>2</sub> (13 mg, 0.05 mmol), IMes<sup>Me</sup>·HCl (19 mg, 0.050 mmol), NaO<sup>t</sup>Bu (5.2 mg, 0.050 mmol) and toluene (0.5 mL) were added to a 10 mL pressure-proof vial with a Teflon-sealed screwcap, and stirred for 10 min at room temperature. **1e** (27 mg, 0.05 mmol) and toluene (0.5 mL) were then added, and the cap was applied to seal the vial. The vessel was run at room temperature for 72 h. The crude mixture was filtered through a pad of silica gel. The filtrate was then concentrated *in vacuo* to give a residue, which was purified by flash column chromatography over silica gel to give **2e** in 61% yield.

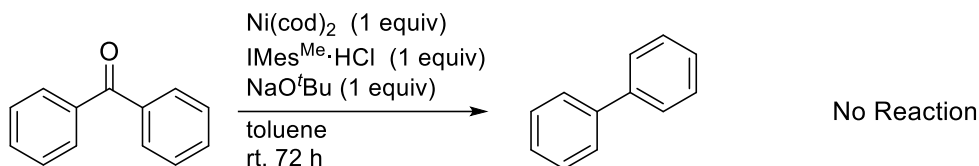

In a glovebox filled with nitrogen, Ni(cod)<sub>2</sub> (13 mg, 0.050 mmol), IMes<sup>Me</sup>·HCl (18 mg, 0.050 mmol), NaO<sup>t</sup>Bu (4.9 mg, 0.050 mmol) and toluene (0.5 mL) were added to a 10 mL pressure-proof vial with a Teflon-sealed screwcap, and stirred for 10 min at room temperature. Benzophenone (12 mg, 0.050 mmol) and toluene (0.5 mL) were then added, and the cap was applied to seal the vial. The vessel was heated at room temperatures for 72 h. The reaction mixture was cooled to room temperature, and the crude mixture was filtered through a pad of silica gel. It was confirmed by <sup>1</sup>H NMR that the reaction was not progressing.

## VIII. Mechanistic studies.

### a. Effect of CO ligand.

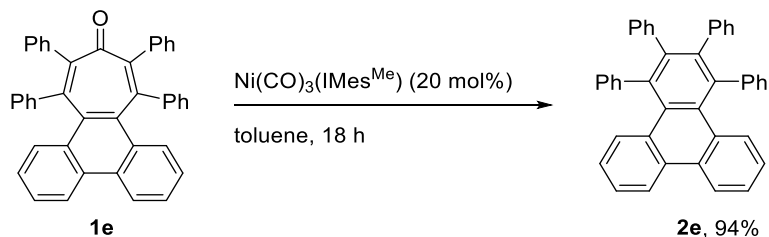

$\text{Ni(CO)}_3(\text{IMes}^{\text{Me}})$  (10 mg, 0.020 mmol), **1e** (58 mg, 0.10 mmol) and toluene (1 mL) were added to a 10 mL-sample vial with a Teflon-sealed screwcap in a glovebox filled with nitrogen. The resulting mixture was stirred at room temperature for 3 min and the cap was closed. The contents of the vial were then stirred at 120 °C for 18 h. The contents were cooled to room temperature, and the crude mixture was filtered through a pad of silica gel. The filtrate was then concentrated *in vacuo* to give the decarbonylative product **2e** (94%).

### $\text{Ni(CO)}_3(\text{IMes}^{\text{Me}})$

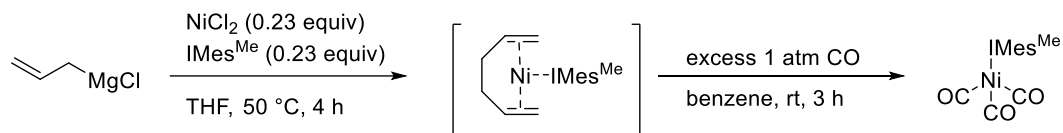

(Allyl)MgCl (7.4 mL, 0.7 M in THF, 5.2 mmol) was added to a stirred suspension of  $\text{NiCl}_2$  (0.16 g, 1.2 mmol) and  $\text{IMes}^{\text{Me}}$  (0.40 g, 1.2 mmol) in 10 mL THF. The mixture was stirred at 50 °C for 4 h and the volatiles removed under reduced pressure. The resulting residue was extracted with pentane (3 x 6 mL) and filtered through celite. The pentane was removed under reduced pressure to give nickel-diene complex, which was used in the next step without further purification.

Excess 1 atm CO was added via a dual manifold Schlenk line to a solution of nickel-diene complex (0.14 g, 0.29 mmol) in 3 mL benzene at rt for 3 h and the volatiles were removed under vacuum to give  $\text{Ni(CO)}_3(\text{IMes}^{\text{Me}})$  as colorless solid (0.13 g, 92%).

$^1\text{H NMR}$  (toluene- $d_8$ , 399.78 MHz)  $\delta$ : 7.13 (s, 1H), 6.97 (s, 2H), 6.81 (s, 4H), 2.13 (s, 6H), 2.01 (s, 12H), 1.52 (s, 6H).

$^{13}\text{C}\{^1\text{H}\}$  NMR ( $\text{CDCl}_3$ , 100.53 MHz)  $\delta$ : 198.6, 190.5, 138.6, 136.3, 135.7, 129.5, 128.5, 21.1, 17.7, 9.2.

IR (KBr,  $\text{cm}^{-1}$ ): 3385 m, 2975 m, 2920 s, 2858 m, 1702 s, 1663 s, 1609 s, 1541 m, 1488 s, 1439 s, 1387 s, 1302 m, 1255 w, 1035 w, 851 m, 750 w, 622 w, 567 m.

HRMS (FAB+TOF)  $m/z$ :  $[\text{M}-\text{CO}+\text{H}]^+$  Calcd for  $\text{C}_{24}\text{H}_{28}\text{N}_2\text{ONi}$  418.1550; Found 418.1567.

HRMS (FAB+TOF)  $m/z$ :  $[M-(CO)_2+H]^+$  Calcd for  $C_{23}H_{28}N_2Ni$  390.1600; Found 390.1616.

The structure of  $Ni(CO)_3(IMes^{Me})$  was unambiguously determined by X-ray crystallography.

### b. Stoichiometric experiment.

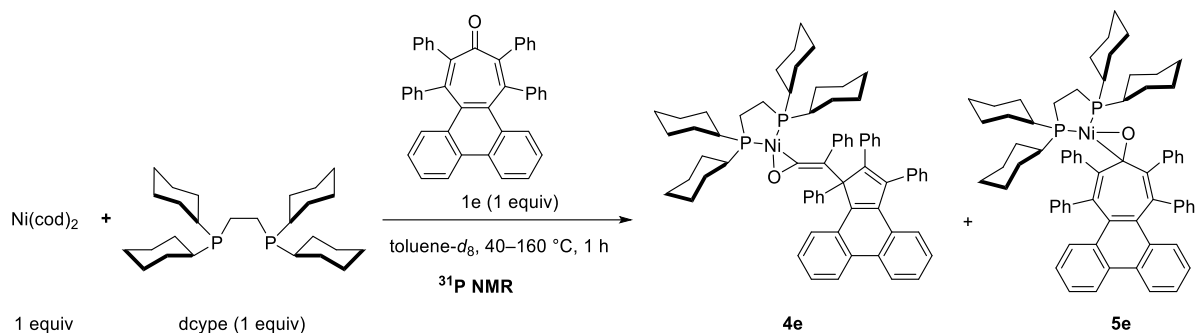

$Ni(cod)_2$  (19 mg, 0.070 mmol), dcype (30 mg, 0.070 mmol), **1e** (25 mg, 0.070 mmol) and  $toluene-d_8$  (1.0 mL) were added to a 10 mL-sample vial with a Teflon-sealed screwcap in a glovebox filled with nitrogen. The resulting mixture was stirred at room temperature for 30 min and transferred to a NMR tube equipped with a screw cap. The cap was closed, and then it was taken out of the glovebox. The contents were then heated at  $40\text{ }^\circ\text{C}$  for 1 h. The contents were cooled to room temperature, the reaction was monitored by  $^{31}\text{P}$  NMR spectroscopy at room temperature. The same procedure was performed at 60, 80, 100, 120, 140 and  $160\text{ }^\circ\text{C}$  (**Figure S1**).

During the course of the reaction, two new downfield peaks assignable to **5e** (**b**:  $\delta = 62.5$  and  $61.3$  ppm,  $J_{pp} = 50.2$  Hz) appeared at  $60\text{ }^\circ\text{C}$  alongside the signal of the  $Ni(cod)(dcype)$  (**a**:  $\delta = 60.6$  ppm, s) on  $^{31}\text{P}$  NMR. The signal of the  $Ni(dcype)(CO)_2$  (**d**:  $\delta = 64.0$  ppm) started to appear at  $120\text{ }^\circ\text{C}$ . Another two new downfield peaks assignable to the Ni-ketene complex (**4e**) (**c**:  $\delta = 71.7$  and  $55.1$  ppm,  $J_{pp} = 48.0$  Hz) appeared at  $100\text{ }^\circ\text{C}$ .

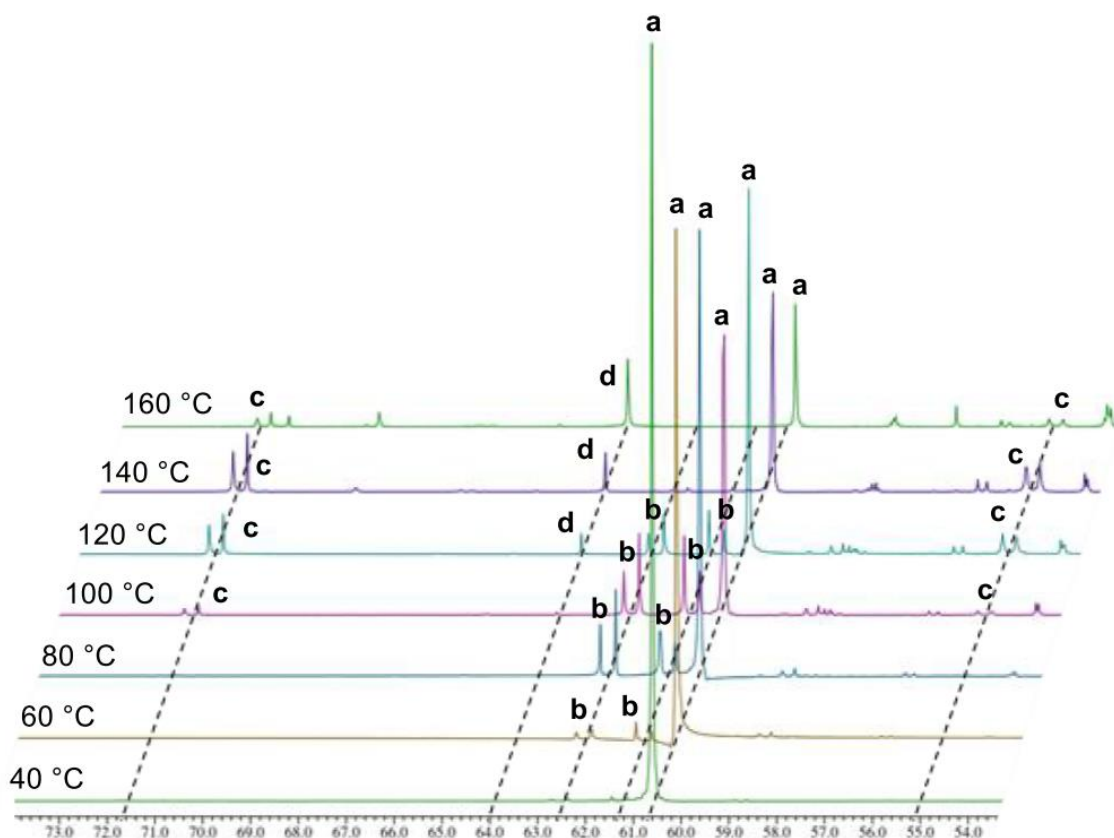

Fig. S1

### Complex 4e and 5e.

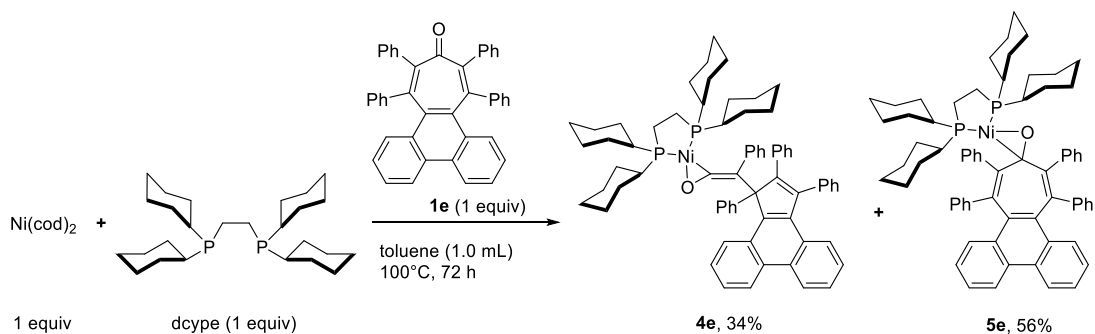

$\text{Ni}(\text{cod})_2$  (28.1 mg, 0.1 mmol), dcype (45 mg, 0.1 mmol), **1e** (56 mg, 0.1 mmol) and toluene (1.0 mL) were added to a 10 mL-sample vial with a Teflon-sealed screwcap in a glovebox filled with nitrogen. The resulting mixture was stirred at room temperature for 30 min to give a homogeneous yellow solution, and the cap was closed. The contents of the vial were then heated at 100 °C for 72 h. Recrystallization from pentane gave orange crystal (**4e**, 34%) and red crystal (**5e**, 56%). They were collected by filtration and dried in a glovebox filled with nitrogen.



Complex **4e**.

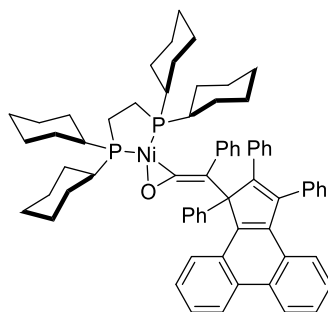

Orange crystal. Decomposition temperature 208 °C.

$^1\text{H}$  NMR (THF-*d*<sub>8</sub>, 399.78 MHz)  $\delta$ : 8.80 (d, *J* = 8.2 Hz, 1H), 8.72 (d, *J* = 8.2 Hz, 1H), 8.37 (d, *J* = 7.8 Hz, 1H), 7.48–7.40 (m, 3H), 7.28 (t, *J* = 7.1 Hz, 1H), 7.14–7.06 (m, 9H), 6.98–6.87 (m, 7H), 6.82 (d, *J* = 6.4 Hz, 2H), 6.73 (t, *J* = 7.1 Hz, 2H), 6.27 (d, *J* = 6.9 Hz, 2H), 1.56–0.87 (m, 48H).

$^{31}\text{P}$  NMR (CDCl<sub>3</sub>, 161.83 MHz)  $\delta$ : 70.2 (d,  $J^{\text{P-P}}$  = 95.4 Hz), 54.2 (d,  $J^{\text{P-P}}$  = 77.9 Hz).

IR (KBr, cm<sup>-1</sup>): 3076 w, 3048 w, 3021 w, 2929 s, 2850 m, 1616 m, 1590 w, 1490 w, 1445 m, 1177 w, 1068 w, 1001 w, 850 w, 774 w, 756 m, 727 m, 704 m, 662 w, 654 w, 644 w, 582 w, 554 w.

HRMS (ESI+TOF) *m/z*: [M+MeOH]<sup>+</sup> Calcd for C<sub>70</sub>H<sub>79</sub>O<sub>2</sub>P<sub>2</sub>Ni 1071.4903; Found 1071.4941.

The structure of **4e** was unambiguously determined by X-ray crystallography.

Complex **5e**.

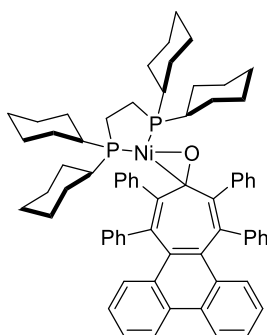

Obtained as a mixture with **1e**. Red crystal. The structure of **5e** was unambiguously determined by X-ray crystallography.

c. Ketene elimination from **4e**.

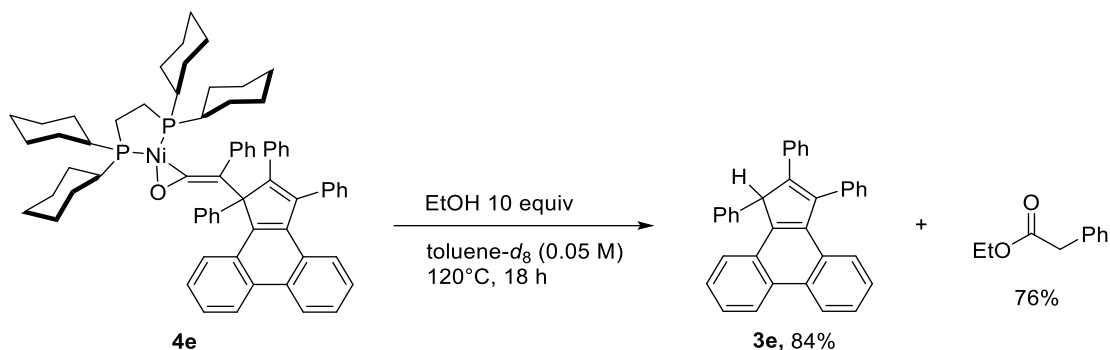

Complex **4e** (10 mg, 0.01 mmol), EtOH (6.0  $\mu$ L, 10 equiv) and toluene-*d*<sub>8</sub> (0.50 mL) were added to a 10 mL-sample vial with a Teflon-sealed screwcap in a glovebox filled with nitrogen. The resulting mixture was stirred at room temperature for 3 min and the cap was closed, and then it was taken out of the glovebox. The contents of the vial were then heated at 120 °C for 18 h. The contents were cooled to room temperature, the product yield was determined by <sup>1</sup>H NMR using 1,3,5-trimethoxybenzene as an internal standard (**3e**: 84%, corresponding ester: 76%).

After 18 h of heating, the peak indicating **4e** (**a**:  $\delta$  = 8.76, 8.68 and 7.91 ppm) disappeared on <sup>1</sup>H NMR. New peaks (**b**:  $\delta$  = 8.51, 7.90 and 5.18 ppm) appeared, and these peaks were consistent with the signal of **3e**. Two peaks (**c**:  $\delta$  = 3.85 and 3.53 ppm) characteristic of the corresponding ester formed by the reaction of ketene and alcohol were also observed. The ratio of **3e** to ester was determined to be about 1:1 by <sup>1</sup>H NMR (**Figure S2**).

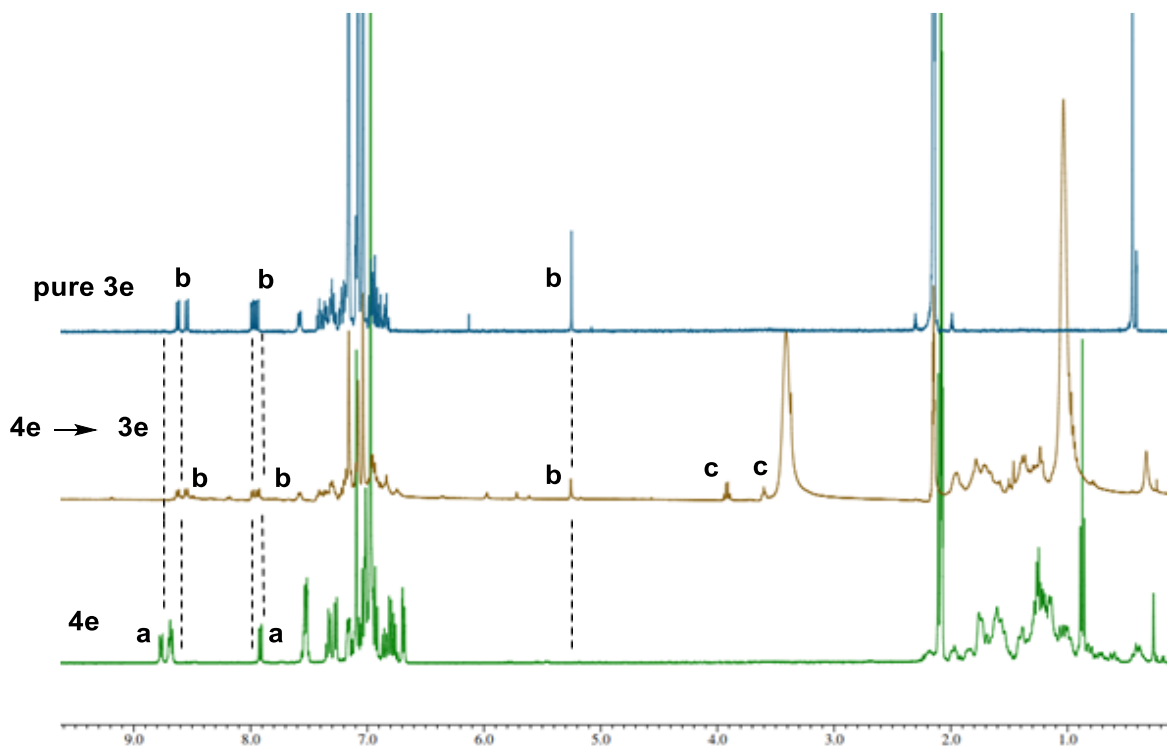

Fig. S2

**d. Labelling experiment.**

**8c,9,10a,11-Tetraphenyl-8c,9,10a,11-tetrahydro-10*H*-cyclobuta[3,4]cyclopenta[1,2-*l*]phenanthren-10-one-9,11-*d*<sub>2</sub> (6e-*d*<sub>2</sub>).**

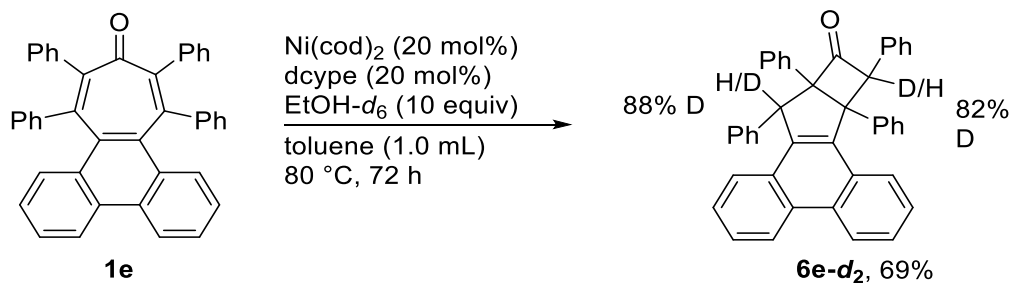

In a glovebox filled with nitrogen, Ni(cod)<sub>2</sub> (5.6 mg, 0.020 mmol), dcype (9.2 mg, 0.020 mmol), EtOH-*d*<sub>6</sub> (58 μL), **1e** (55 mg, 0.10 mmol) and toluene (1.0 mL) were added to a 10 mL pressure-proof vial with a Teflon-sealed screwcap and the cap was closed. The contents of the vial were then stirred at 80 °C (aluminum heating block) for 72 h. The reaction mixture was cooled to room temperature, and a colorless precipitate was formed. The solid obtained was filtered and washed hexane to give **5e-*d*<sub>2</sub>**.

Colorless solid (39 mg, 69%). Mp 233–234 °C  $R_f$  0.22 (SiO<sub>2</sub>, hexane/CHCl<sub>3</sub> = 2/1 (v/v)).

<sup>1</sup>H NMR (CDCl<sub>3</sub>, 399.78 MHz)  $\delta$ : 8.73 (d,  $J$  = 8.2 Hz, 1H), 8.59 (d,  $J$  = 8.2 Hz, 1H), 7.67–7.63 (m, 2H), 7.52–7.44 (m, 2H), 7.33–7.28 (m, 3H), 7.22 (t,  $J$  = 7.3 Hz, 1H), 7.14 (td,  $J$  = 7.6, 1.2 Hz, 1H), 7.05–6.91 (m, 5H), 6.85 (t,  $J$  = 7.8 Hz, 2H), 6.80–6.73 (m, 4H), 6.68–6.60 (m, 3H), 6.53 (d,  $J$  = 8.2 Hz, 1H), 6.29 (s, 2H), 5.83 (s, 0.2H), 5.61 (s, 0.1H).

<sup>13</sup>C{<sup>1</sup>H} NMR (CDCl<sub>3</sub>, 100.53 MHz)  $\delta$ : 209.7, 140.6, 139.6, 139.3, 138.2, 133.0 (two peaks are overlapped), 131.7, 131.1, 130.4, 129.8, 129.7, 129.5 (two peaks are overlapped), 129.3, 128.6, 128.5, 128.3, 128.0, 127.9, 127.7, 127.5, 127.3, 126.9 (three peaks are overlapped), 126.5, 125.7, 125.1, 123.2, 122.4, 84.9, 69.8, 66.5, 57.4.

<sup>2</sup>H NMR (CDCl<sub>3</sub>, 399.78 MHz)  $\delta$ : 5.82, 5.61.

IR (KBr, cm<sup>-1</sup>): 3081 m, 3050 m, 3027 m, 1768 s, 1597 m, 1495 s, 1447 m, 1149 m, 1031 w, 922 w, 759 s, 730 s, 722 m, 699 s, 679 w, 618 w, 543 m, 533 m, 507 w.

HRMS (DART+TOF)  $m/z$ : [M+H]<sup>+</sup> Calcd for C<sub>43</sub>H<sub>29</sub>OD<sub>2</sub> 565.2495; Found 565.2490.

### 1,2,3-Triphenyl-1*H*-cyclopenta[*l*]phenanthrene-1-*d* (**3e-d**).

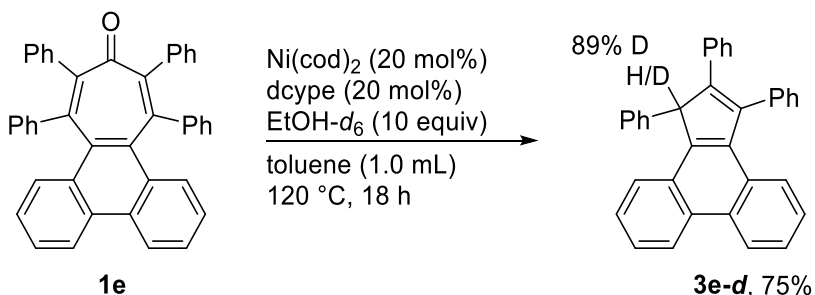

In a glovebox filled with nitrogen, Ni(cod)<sub>2</sub> (5.8 mg, 0.021 mmol), dcype (8.9 mg, 0.020 mmol), EtOH-*d*<sub>6</sub> (80  $\mu$ L), **1e** (59.8 mg, 0.11 mmol) and toluene (1.0 mL) were added to a 10 mL pressure-proof vial with a Teflon-sealed screwcap and the cap was closed. The contents of the vial were then stirred at 120 °C (aluminum heating block) for 18 h. The reaction mixture was cooled to room temperature, and the crude mixture was filtered through a pad of silica gel. The filtrate was then concentrated in vacuo to give a residue, which was purified by flash column chromatography over silica gel to give **3e-d**.

Colorless solid (33 mg, 75%). Mp 205–213 °C  $R_f$  0.54 (SiO<sub>2</sub>, hexane/CHCl<sub>3</sub> = 2/1 (v/v)).

<sup>1</sup>H NMR (CDCl<sub>3</sub>, 399.78 MHz)  $\delta$ : 8.77 (d,  $J$  = 8.2 Hz, 1H), 8.70 (d,  $J$  = 8.2 Hz, 1H), 7.88 (dd,  $J$  = 8.2, 0.9 Hz, 1H), 7.66 (d,  $J$  = 7.8 Hz, 1H), 7.63–7.50 (m, 4H), 7.45–7.36 (m, 3H), 7.29 (td,  $J$  = 7.7, 1.2 Hz, 2H), 7.20–7.13 (m, 4H), 7.11–7.01 (m, 6H), 5.48 (s, 0.1 H).

<sup>13</sup>C{<sup>1</sup>H} NMR (CDCl<sub>3</sub>, 100.53 MHz)  $\delta$ : 150.2, 142.9, 141.4, 139.5, 139.0, 138.5, 135.6, 131.5, 130.9,

129.7, 129.5, 129.1, 128.8, 128.7, 128.6, 128.5, 128.3, 127.7, 127.6, 126.8 (two peaks are overlapped), 126.6, 126.0, 125.8, 125.6, 125.3, 124.5, 123.4 (two peaks are overlapped), 58.6.

$^2\text{H}$  NMR ( $\text{CDCl}_3$ , 399.78 MHz)  $\delta$ : 5.49.

IR (KBr,  $\text{cm}^{-1}$ ): 3078 w, 3057 w, 3023 w, 2924 w, 1599 w, 1492 m, 1442 m, 1239 w, 1215 w, 1157 w, 1075 w, 1028 w, 932 w, 909 w, 802 w, 787 w, 753 s, 725 s, 708 m, 698 s, 667 w, 615 w, 559 w, 536 w, 518 w.

HRMS (DART+TOF)  $m/z$ :  $[\text{M}+\text{H}]^+$  Calcd for  $\text{C}_{35}\text{H}_{24}\text{D}$  446.2014; Found 446.2014.

#### e. Role of Ni in the Cleavage of C–C bond in 7e.

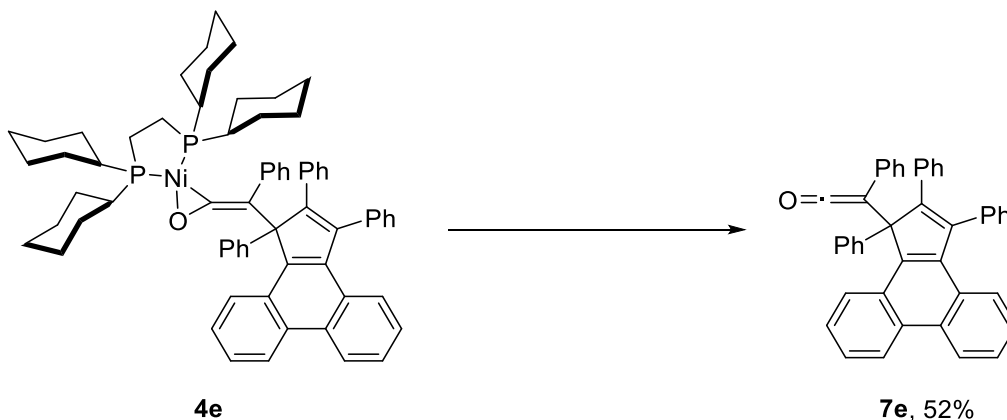

Ni-ketene complex (**4e**) (15.2 mg, 0.01 mmol) was filtered through a pad of silica gel. The filtrate was then concentrated in vacuo to give **7e** (52%).

#### 2-Phenyl-2-(1,2,3-triphenyl-1*H*-cyclopenta[*l*]phenanthren-1-yl)ethen-1-one (**7e**).

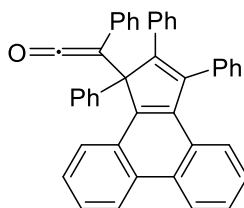

Yellow solid (4.1 mg, 52%). Mp 239–243 °C  $R_f$  0.49 ( $\text{SiO}_2$ , hexane/ $\text{CHCl}_3$  = 1/1 ( $v/v$ )).

$^1\text{H}$  NMR ( $\text{THF}-d_8$ , 399.78 MHz)  $\delta$ : 8.86 (d,  $J$  = 10.4 Hz, 1H), 8.84 (d,  $J$  = 9.2 Hz, 1H), 7.96 (d,  $J$  = 8.2 Hz, 1H), 7.59–7.53 (m, 3H), 7.46 (dd,  $J$  = 8.0 Hz, 7.1 Hz, 1H), 7.33–7.09 (m, 11H), 7.07–6.91 (m, 8H), 6.67 (d,  $J$  = 8.2 Hz, 2H).

$^{13}\text{C}$  NMR ( $\text{THF}-d_8$ , 100.53 MHz)  $\delta$ : 202.2, 154.4, 144.2, 142.7, 139.8, 139.2, 138.7, 135.8, 132.7, 131.8, 131.5, 131.1, 130.7, 130.3, 129.3, 129.1, 129.0, 128.8, 128.7, 128.6, 128.5, 128.0, 127.7, 127.6, 127.0, 126.9, 126.6, 126.5, 126.4, 126.1, 126.0, 124.2, 124.1, 64.0, 46.7.

IR (KBr,  $\text{cm}^{-1}$ ): 3898 w, 3851 w, 3646 w, 2093 s, 1595 w, 1557 w, 1538 w, 1505 w, 1494 w, 1443 w, 1029

w, 753 m, 725 w, 700 m, 559 w, 488 w, 480 w, 445 w, 435 w, 428 w, 416 m, 403 w.

HRMS (DART) Calcd for C<sub>43</sub>H<sub>29</sub>O ([M+H<sup>+</sup>]):561.2213. Found: 561.2210.

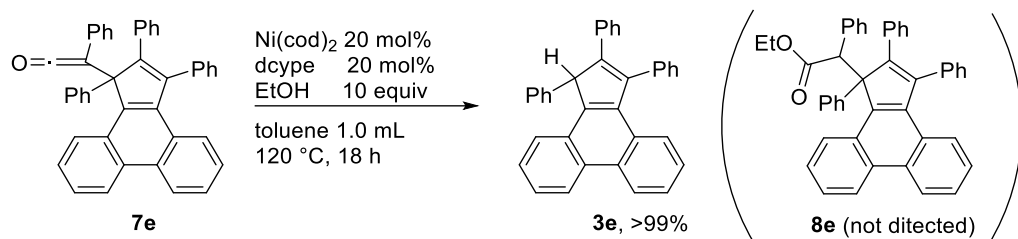

In a glovebox filled with nitrogen, Ni(cod)<sub>2</sub> (2.5 mg, 0.009 mmol), dcype (4.3 mg, 0.009 mmol), EtOH (30 μL, 10 equiv), **7e** (28.0 mg, 0.05 mmol) and toluene (0.5 mL) were added to a 10 mL pressure-proof vial with a Teflon-sealed screwcap and the cap was closed. The contents of the vial were then stirred at 120 °C (aluminum heating block) for 18 h. The reaction mixture was cooled to room temperature, and the crude mixture was filtered through a pad of silica gel. The filtrate was then concentrated in vacuo to give **3e** as a colorless solid (23 mg, >99%).

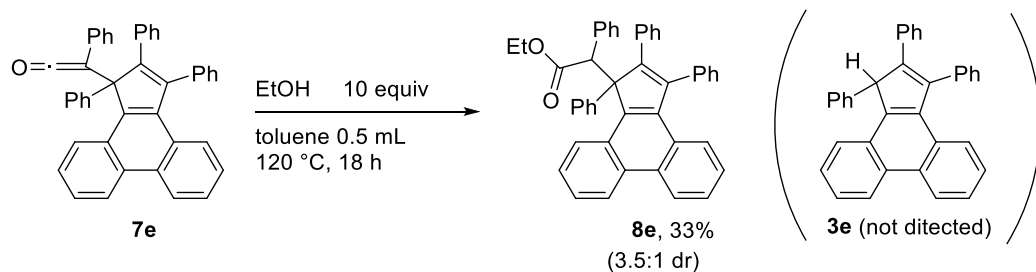

In a glovebox filled with nitrogen, **7e** (28 mg, 0.050 mmol), EtOH (30 μL, 10 equiv) and toluene (0.5 mL) were added to a 10 mL pressure-proof vial with a Teflon-sealed screwcap and the cap was closed. The contents of the vial were then stirred at 120 °C (aluminum heating block) for 18 h. Yield was determined by <sup>1</sup>H NMR spectroscopy using 1,3,5-trimethoxybenzene as an internal standard (33%).

#### f. Thermal conversion from **3e** to **6e**.

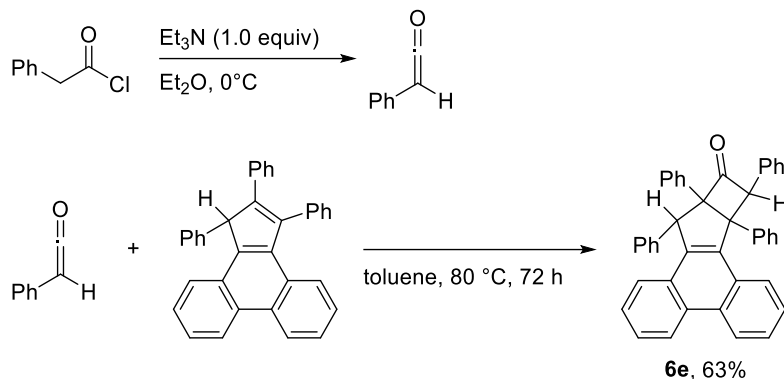

Phenylacetyl chloride (2.0 g, 13 mmol) was dissolved in diethyl ether (20 mL) and cooled to 0 °C. Freshly distilled triethylamine (1.8 mL, 1.0 equiv) was added dropwise over 30 min. When addition was complete the flask was stoppered and stored at 0 °C for overnight. The reaction mixture was warmed to rt and the salts were filtered and washed with diethyl ether until washings were colorless. The residue was concentrated to give phenylketene without further purification.

In a glovebox filled with nitrogen, phenylketene (5.9 mg, 0.05 mmol), **3e** (22 mg, 0.05 mmol) and toluene (0.5 mL) were added to a 10 mL pressure-proof vial with a Teflon-sealed screwcap and the cap was closed. The contents of the vial were then stirred at 80 °C (aluminum heating block) for 72 h. Yield was determined by <sup>1</sup>H NMR spectroscopy using 1,3,5-trimethoxybenzene as an internal standard (63%).

### g. Retro [2+2] Reaction from cyclobutanone derivatives **6e** to cyclopentadiene derivatives **3e**.

#### NMR studies.

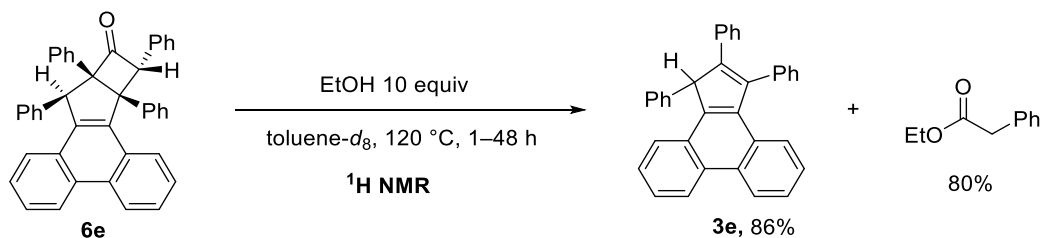

Cyclobutanone derivatives **6e** (57 mg, 0.1 mmol), EtOH (58 μL, 10 equiv) and toluene-*d*<sub>8</sub> (60 μL) were added to a NMR tube equipped with a screw cap. The cap was closed, and then it was taken out of the glovebox. The contents were then heated at 120 °C for 1 h. The contents were cooled to room temperature, the reaction was monitored by <sup>1</sup>H NMR spectroscopy at room temperature. The same procedure was performed at 120 °C for 6, 12, 18, 36, 48 h (**Figure S3**).

During the course of the reaction, new peaks (**b**: δ = 8.55, 8.48 and 5.18 ppm) appeared after 6 hours of heating alongside the signal of the **6e** (**a**: δ = 8.45, 8.35, 5.79 and 5.66 ppm) on <sup>1</sup>H NMR. These peaks were consistent with the signal of **3e**. Simultaneously, the characteristic peak of ester (**c**: δ = 3.84 ppm)

appeared. After 48 hours, the signal of cyclobutanone disappeared, and the peak of cyclopentadiene and ester were observed.

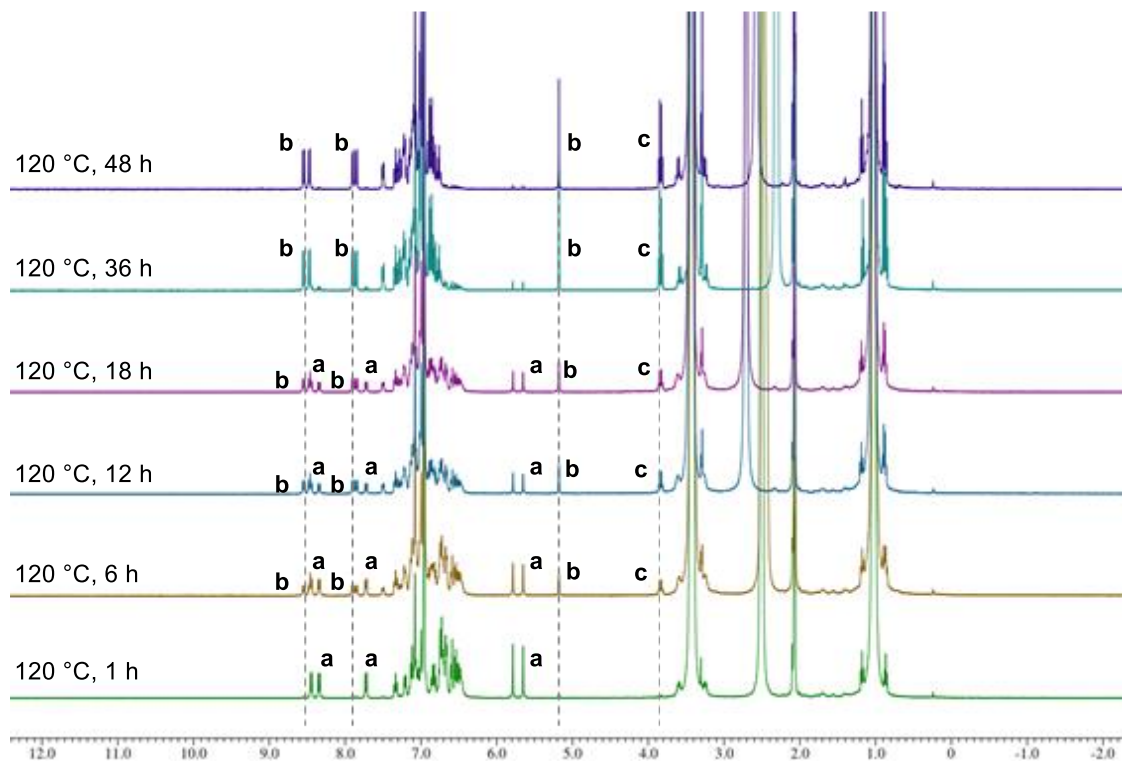

Fig. S3

#### h. Thermal Reaction of Ketene with Ethanol.

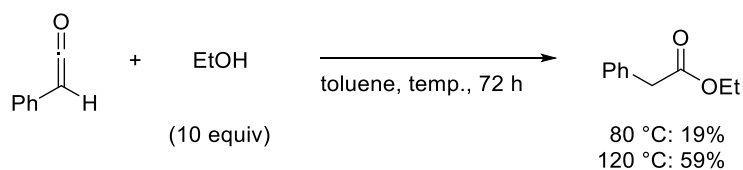

In a glovebox filled with nitrogen, phenyl ketene (11.5 mg, 0.05 mmol), EtOH (60  $\mu$ L) and toluene (0.5 mL) were added to a 10 mL pressure-proof vial with a Teflon-sealed screwcap and the cap was closed. The contents of the vial were then stirred at 80  $^\circ$ C or 120  $^\circ$ C (aluminum heating block) for 72 h. Yield was determined by  $^1\text{H}$  NMR spectroscopy using 1,3,5-trimethoxybenzene as an internal standard.



## IX. DFT Calculations.

All calculations were performed on actually used ligands (monodentate IMes<sup>Me</sup> and bidentate dcype) and substrates (**1e** and **1c**) without simplification except for **1h**. For **1h**,  $\alpha$ -phenyl analogue was used as a model for clarity.

### a. Distortion/Interaction Analysis.

**Table S2** Distortion/interaction analysis for **TS1**.

| $\Delta E / \text{kcal mol}^{-1}$                             | <b>TS1 (1c)</b> | <b>TS1 (1e)</b> | <b>TS1 (1h)</b> |
|---------------------------------------------------------------|-----------------|-----------------|-----------------|
| $\Delta E_{\text{strain}}$                                    | 43.2            | 20.4            | 36.6            |
| $\Delta E_{\text{int}}$                                       | 17.5            | 10.3            | 15.4            |
| $\Delta E = \Delta E_{\text{strain}} + \Delta E_{\text{int}}$ | 60.7            | 30.7            | 52.0            |

## b. Computed energy profiles.

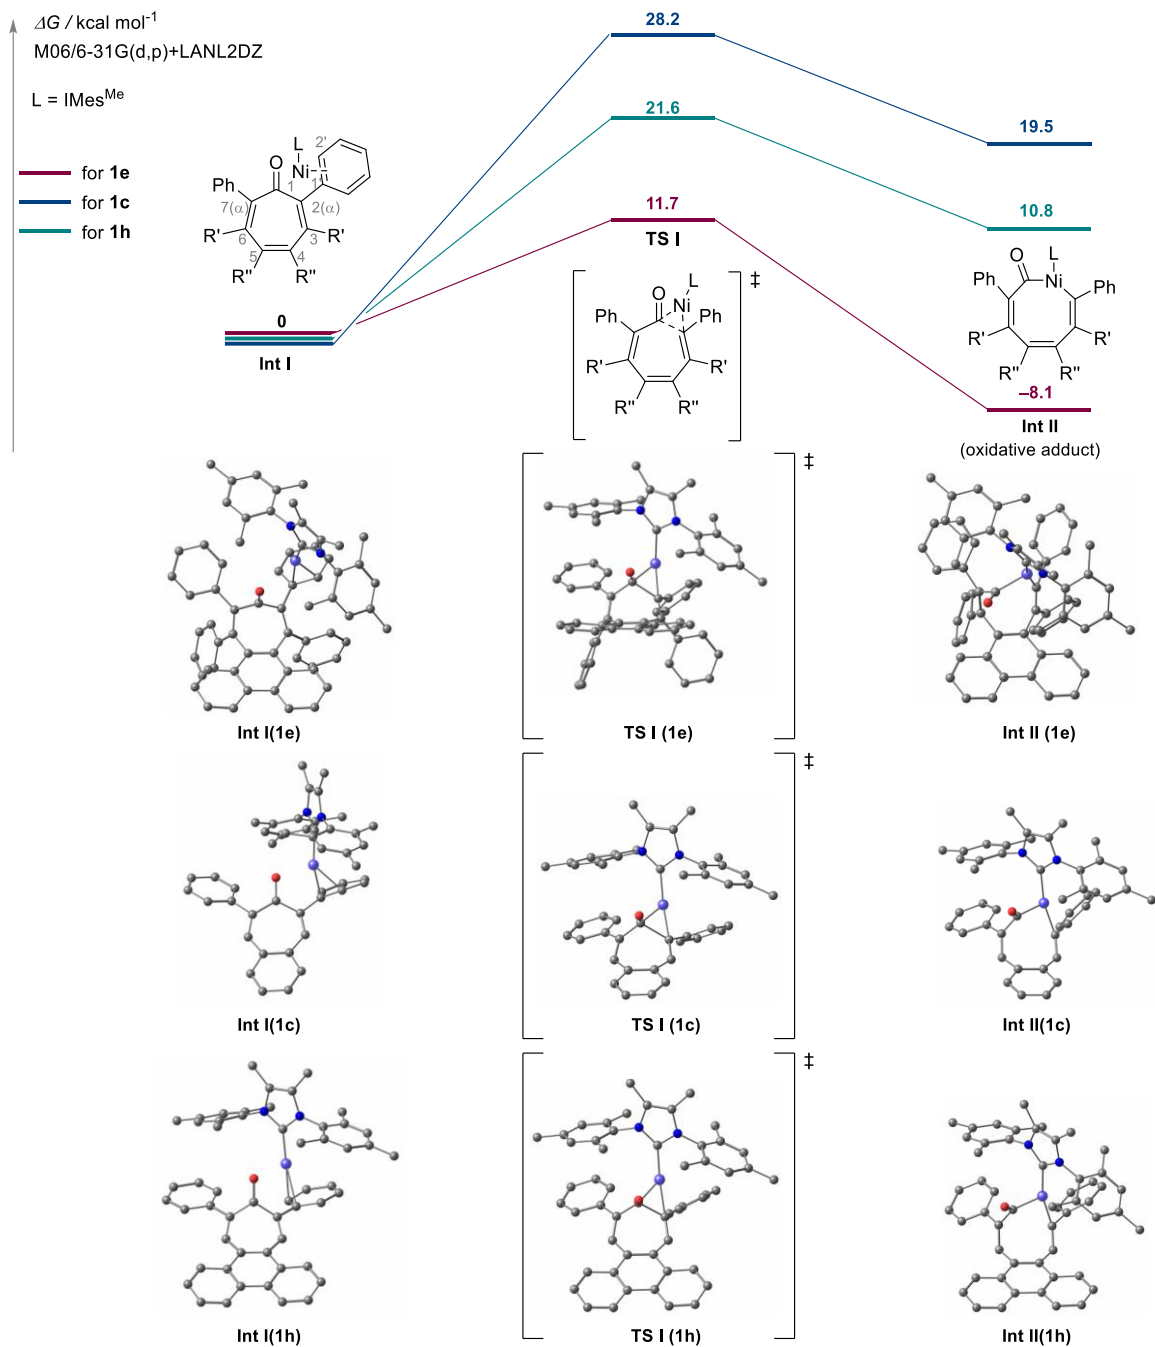

**Fig. S4.** Substrate dependence on oxidative addition of **1e** (red), **1c** (blue), and **1h** (green) to Ni-IMes<sup>Me</sup> at the M06-2X/6-31G(d,p)-LanL2DZ level of theory. For **1h**,  $\alpha$ -phenyl analogue was used as a model for clarity.

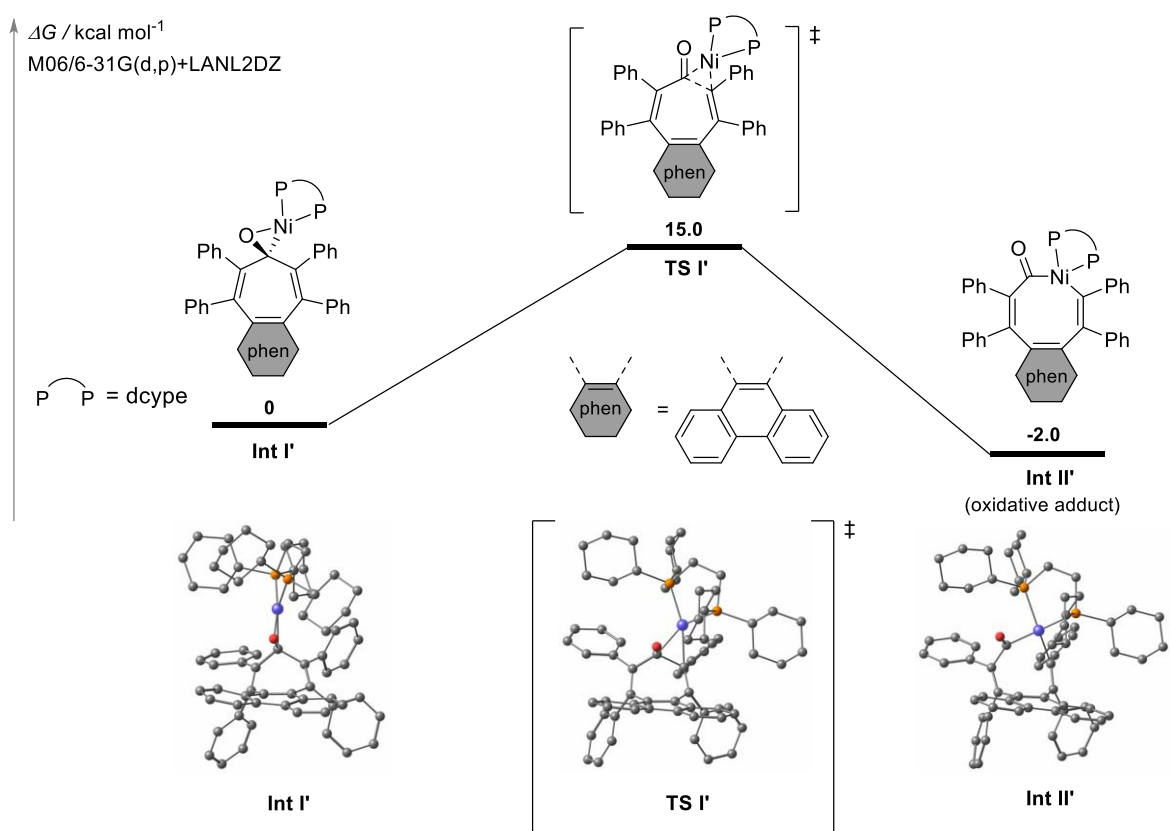

**Fig. S5.** Oxidative addition of **1e** to Ni-dcype at the at the M06-2X/6-31G(d,p)-Lanl2DZ level of theory.

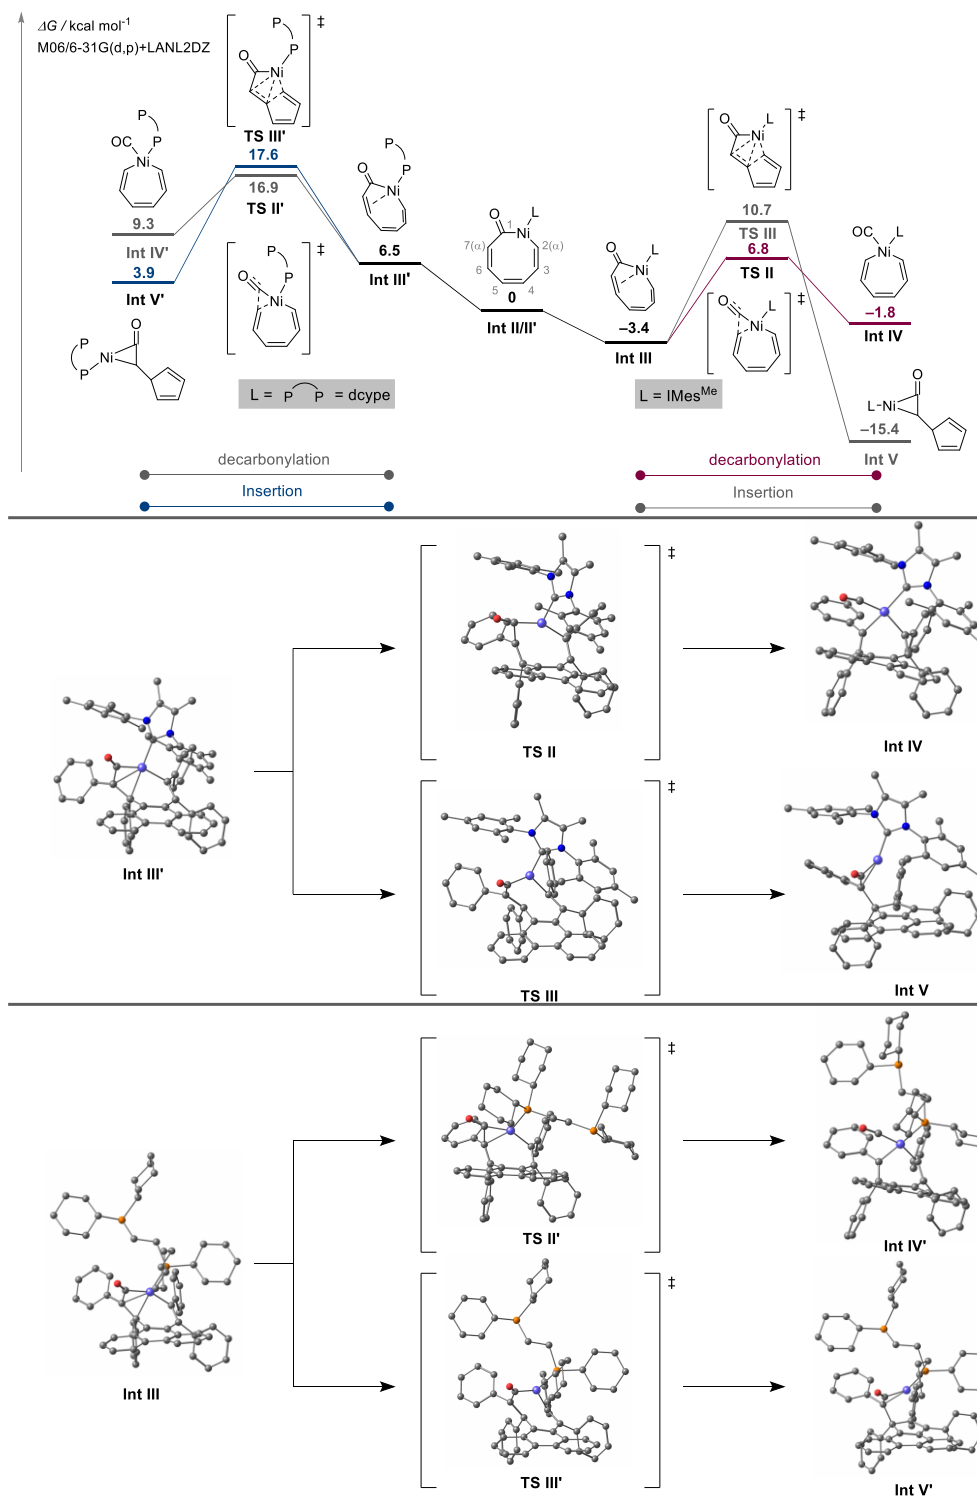

**Fig. S6.** Energy diagram for ligand-controlled selective ring contraction reactions of **1e** at the at the M06-2X/6-31G(d,p)-Lanl2DZ level of the theory.

## X. Crystallographic Information.

View1

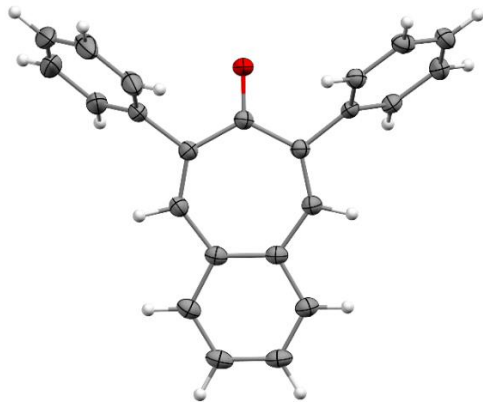

View2

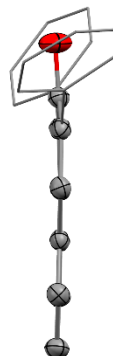

**Fig. S7.** ORTEP drawing of **1c** with thermal ellipsoids set at the 50% probability level.<sup>a</sup>

<sup>a</sup>Crystal data for **1c**, triclinic, space group  $P\bar{1}$  (no. 2),  $a = 10.99710(10)$  Å,  $b = 21.3867(2)$  Å,  $c = 28.8610(2)$  Å,  $\alpha = 76.1520(10)^\circ$ ,  $\beta = 85.8840(10)^\circ$ ,  $\gamma = 86.2040(10)^\circ$ ,  $V = 6565.15(10)$  Å<sup>3</sup>,  $T = 123$  K,  $Z = 2$ ,  $R1$  ( $wR2$ ) = 0.0434 (0.1171) for 1729 parameters and 26553 unique reflections. GOF = 1.046. CCDC 2115589.

View1

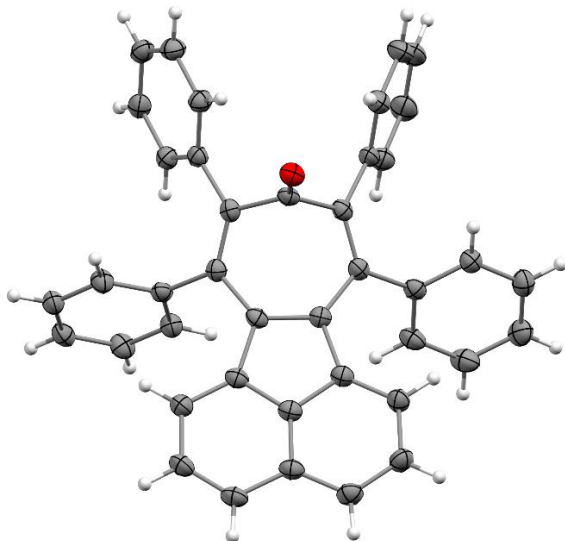

View2

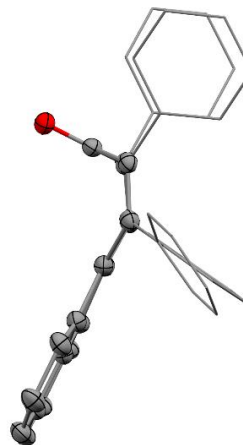

**Fig. S8.** ORTEP drawing of **1i** with thermal ellipsoids set at the 50% probability level.<sup>a</sup>

<sup>a</sup>Crystal data for **1i**, triclinic, space group  $P\bar{1}$  (no. 2),  $a = 10.4122(3)$  Å,  $b = 11.1627(3)$  Å,  $c = 14.3485(3)$  Å,  $\alpha = 103.578(2)^\circ$ ,  $\beta = 103.147(2)^\circ$ ,  $\gamma = 112.391(3)^\circ$ ,  $V = 1402.62(7)$  Å<sup>3</sup>,  $T = 123$  K,  $Z = 2$ ,  $R1$  ( $wR2$ ) = 0.0554 (0.1469) for 380 parameters and 5623 unique reflections. GOF = 1.059. CCDC 2115591.

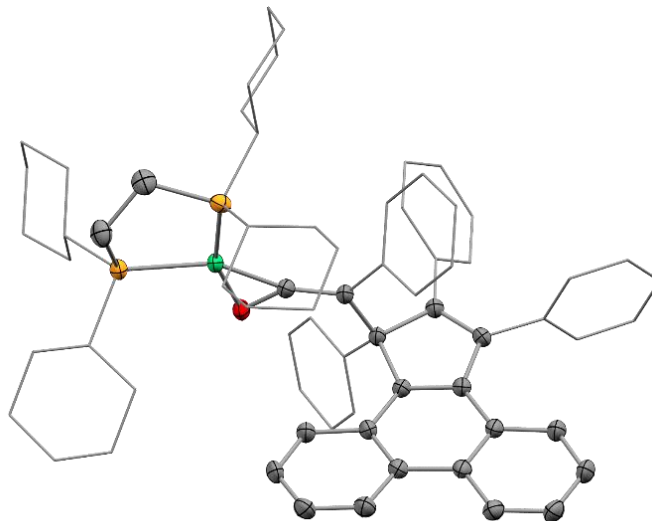

**Fig. S9.** ORTEP drawing of **4e** with thermal ellipsoids set at the 50% probability level.<sup>a</sup>

<sup>a</sup>Crystal data for **4e**, monoclinic, space group  $P 2_1/c$  (no. 14),  $a = 33.7405(2) \text{ \AA}$ ,  $b = 13.53070(10) \text{ \AA}$ ,  $c = 24.6084(2) \text{ \AA}$ ,  $\alpha = \gamma = 90^\circ$   $\beta = 105.0390(10)^\circ$ ,  $V = 10849.75(14) \text{ \AA}^3$ ,  $T = 123 \text{ K}$ ,  $Z = 4$ ,  $R1$  ( $wR2$ ) = 0.0531 (0.1423) for 1315 parameters and 21988 unique reflections. GOF = 1.383. CCDC 2115592.

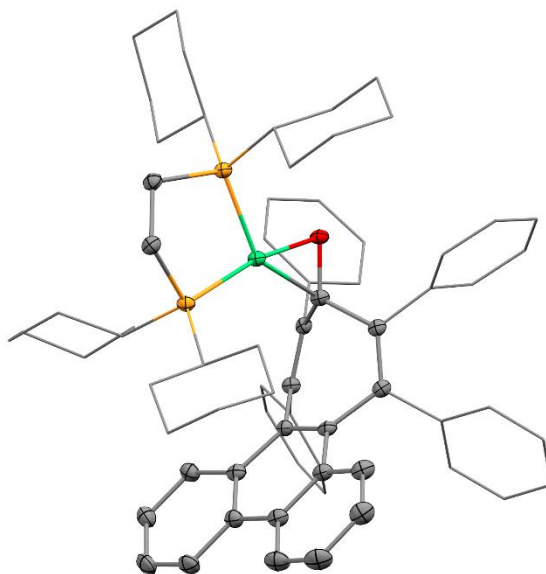

**Fig. S10.** ORTEP drawing of **5e** with thermal ellipsoids set at the 50% probability level.<sup>a</sup>

<sup>a</sup>Crystal data for **5e**, triclinic, space group  $P \bar{1}$  (no. 2),  $a = 10.9952(2) \text{ \AA}$ ,  $b = 14.1370(2) \text{ \AA}$ ,  $c = 21.6909(3) \text{ \AA}$ ,  $\alpha = 104.7600(10)^\circ$ ,  $\beta = 97.2130(10)^\circ$ ,  $\gamma = 100.5840(10)^\circ$ ,  $V = 3151.76(9) \text{ \AA}^3$ ,  $T = 123 \text{ K}$ ,  $Z = 2$ ,  $R1$  ( $wR2$ ) = 0.0728 (0.2025) for 748 parameters and 12709 unique reflections. GOF = 1.126. CCDC 2115590.

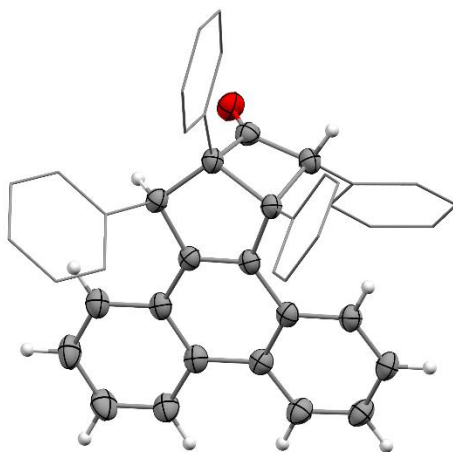

**Fig. S11.** ORTEP drawing of **6e** with thermal ellipsoids set at the 50% probability level.<sup>a</sup>

<sup>a</sup>Crystal data for **6e**, monoclinic, space group  $P 2_1/n$  (no. 14),  $a = 13.0907(5)$  Å,  $b = 10.1466(3)$  Å,  $c = 22.1188(7)$  Å,  $\alpha = \gamma = 90^\circ$   $\beta = 94.055(3)^\circ$ ,  $V = 2930.60(18)$  Å<sup>3</sup>,  $T = 123$  K,  $Z = 4$ ,  $R1$  ( $wR2$ ) = 0.0647 (0.1735) for 397 parameters and 5927 unique reflections. GOF = 1.050. CCDC 2115593.

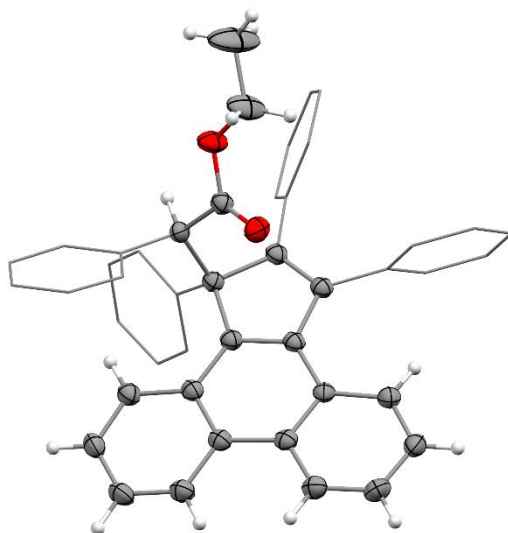

**Fig. S12.** ORTEP drawing of **8e** with thermal ellipsoids set at the 50% probability level.<sup>a</sup>

<sup>a</sup>Crystal data for **8e**, triclinic, space group  $P \bar{1}$  (no. 2),  $a = 10.26982(17)$  Å,  $b = 12.9000(2)$  Å,  $c = 13.4161(2)$  Å,  $\alpha = 101.7874(13)^\circ$ ,  $\beta = 98.9295(13)^\circ$ ,  $\gamma = 108.9135(15)^\circ$ ,  $V = 1598.20(5)$  Å<sup>3</sup>,  $T = 123$  K,  $Z = 2$ ,  $R1$  ( $wR2$ ) = 0.0529 (0.1489) for 425 parameters and 6464 unique reflections. GOF = 1.082. CCDC 2115594.

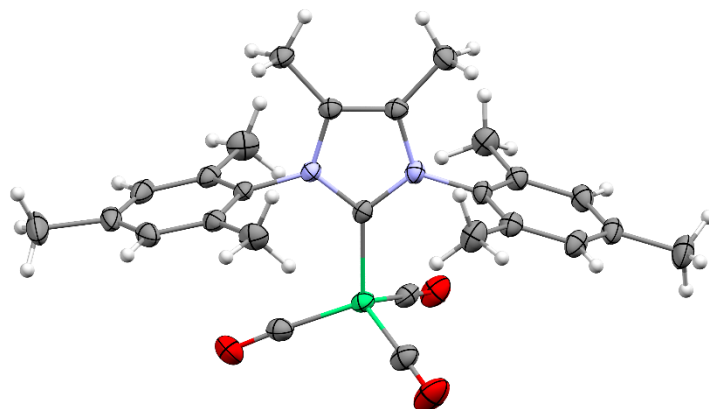

**Fig. S13.** ORTEP drawing of  $\text{Ni}(\text{CO})_3(\text{IMes}^{\text{Me}})$  with thermal ellipsoids set at the 50% probability level.<sup>a</sup>

<sup>a</sup>Crystal data for  $\text{Ni}(\text{CO})_3(\text{IMes}^{\text{Me}})$ , monoclinic, space group  $P 2_1/c$  (no. 14),  $a = 19.0889(5)$  Å,  $b = 15.9034(4)$  Å,  $c = 18.9504(7)$  Å,  $\alpha = \gamma = 90^\circ$   $\beta = 106.854(4)^\circ$ ,  $V = 5505.8(3)$  Å<sup>3</sup>,  $T = 123$  K,  $Z = 4$ ,  $R1$  ( $wR2$ ) = 0.0365 (0.0991) for 657 parameters and 13240 unique reflections. GOF = 1.061. CCDC 2115595.

## X. Cartesian Coordinates and Energies of Optimized Structures.

### Phenylketene.

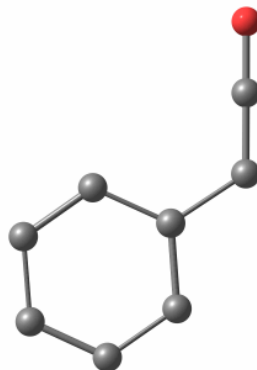

|   |             |             |             |
|---|-------------|-------------|-------------|
| 8 | -3.47099900 | 0.56787300  | -0.00002700 |
| 6 | -2.53260600 | -0.11982800 | 0.00001900  |
| 6 | -1.46510400 | -0.89730700 | 0.00001500  |
| 6 | -0.08739400 | -0.38625900 | 0.00000700  |
| 6 | 0.97543400  | -1.29602900 | -0.00000400 |
| 6 | 2.29164700  | -0.84787300 | -0.00001000 |
| 6 | 2.57149000  | 0.51516800  | -0.00000600 |
| 6 | 1.51843000  | 1.42781700  | 0.00000400  |
| 6 | 0.20266500  | 0.98504300  | 0.00001100  |
| 1 | -1.65886400 | -1.96335600 | 0.00001000  |
| 1 | 0.76499300  | -2.36162600 | -0.00000700 |



|   |             |             |             |
|---|-------------|-------------|-------------|
| 1 | 3.10216400  | -1.56997100 | -0.00001900 |
| 1 | 3.59843600  | 0.86444400  | -0.00001200 |
| 1 | 1.72251200  | 2.49390600  | 0.00000800  |
| 1 | -0.60862300 | 1.70922200  | 0.00002000  |

Method: M06-2X/6-31G(d,p) Key word: opt freq pop=full  
 imaginary frequencies: 0 Energy: -383.413497 Hartree

**1,2,3-triphenyl-1*H*-cyclopenta[*l*]phenanthrene. (3e)**

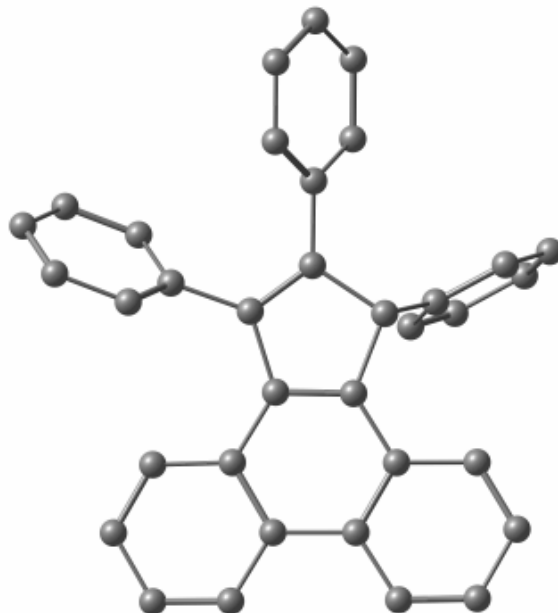

|   |             |             |             |
|---|-------------|-------------|-------------|
| 6 | 2.48500400  | -0.90852500 | -0.68350900 |
| 6 | 3.52128400  | 0.03882400  | -0.48161200 |
| 6 | 3.19089000  | 1.37216400  | 0.01468800  |
| 6 | 1.83398900  | 1.74535500  | 0.22470100  |
| 6 | 0.80408000  | 0.78632900  | -0.10718100 |
| 6 | 1.13353800  | -0.48774600 | -0.48086800 |
| 6 | 2.79947300  | -2.21552600 | -1.11704400 |
| 6 | 4.10352100  | -2.58092900 | -1.36127500 |
| 6 | 5.13406900  | -1.64304300 | -1.18344100 |
| 6 | 4.84591900  | -0.36554300 | -0.75295600 |
| 6 | 4.19662200  | 2.30832300  | 0.33753100  |
| 6 | 3.89264200  | 3.54386800  | 0.86573900  |
| 6 | 2.55659700  | 3.88956600  | 1.11356100  |
| 6 | 1.54907400  | 3.00403300  | 0.80022000  |
| 6 | -0.67639700 | 0.90022200  | -0.08809800 |
| 6 | -1.21683100 | -0.30998300 | -0.36987500 |
| 6 | -0.11286300 | -1.32094500 | -0.64096000 |
| 6 | -2.65179500 | -0.62656100 | -0.54475800 |
| 6 | -3.43208900 | 0.14700800  | -1.41547700 |
| 6 | -4.77937900 | -0.13570400 | -1.60459300 |
| 6 | -5.37275300 | -1.19840500 | -0.92736600 |
| 6 | -4.60941200 | -1.97148400 | -0.05768300 |
| 6 | -3.25915100 | -1.69181500 | 0.13374000  |
| 6 | -1.46366200 | 2.14372800  | 0.08938100  |
| 6 | -1.25648200 | 3.22700200  | -0.77377400 |
| 6 | -2.02016900 | 4.38194300  | -0.65369400 |

|   |             |             |             |
|---|-------------|-------------|-------------|
| 6 | -3.00239500 | 4.47014600  | 0.33108400  |
| 6 | -3.21746400 | 3.39644900  | 1.19053500  |
| 6 | -2.45449400 | 2.23838700  | 1.06957900  |
| 6 | -0.16102700 | -2.53443700 | 0.27135700  |
| 6 | -0.52031800 | -3.78760700 | -0.22265200 |
| 6 | -0.61992300 | -4.88376600 | 0.63202900  |
| 6 | -0.36046400 | -4.73330500 | 1.99029200  |
| 6 | 0.00450400  | -3.48322700 | 2.48956000  |
| 6 | 0.10533300  | -2.39140100 | 1.63556200  |
| 1 | 1.99590900  | -2.93254300 | -1.25391300 |
| 1 | 4.33480600  | -3.58723300 | -1.69509500 |
| 1 | 6.16277900  | -1.92277700 | -1.38649300 |
| 1 | 5.66338600  | 0.33499600  | -0.63127800 |
| 1 | 5.23893700  | 2.05317900  | 0.18914100  |
| 1 | 4.69053300  | 4.23872100  | 1.10727500  |
| 1 | 2.31451700  | 4.84835900  | 1.56051200  |
| 1 | 0.52292500  | 3.26831000  | 1.01906200  |
| 1 | -0.21667100 | -1.66537500 | -1.68013000 |
| 1 | -2.96881400 | 0.97572900  | -1.94252500 |
| 1 | -5.36702600 | 0.47438600  | -2.28328200 |
| 1 | -6.42495600 | -1.42011500 | -1.07505700 |
| 1 | -5.06671700 | -2.79618200 | 0.48005100  |
| 1 | -2.67842800 | -2.29139200 | 0.82659900  |
| 1 | -0.48414100 | 3.15594100  | -1.53531000 |
| 1 | -1.84937700 | 5.21365800  | -1.32984300 |
| 1 | -3.59772100 | 5.37264000  | 0.42622800  |
| 1 | -3.98249400 | 3.45964100  | 1.95788800  |
| 1 | -2.62547100 | 1.39425000  | 1.73101100  |
| 1 | -0.73790600 | -3.90157000 | -1.28180800 |
| 1 | -0.90413000 | -5.85318300 | 0.23492300  |
| 1 | -0.43766100 | -5.58504400 | 2.65829000  |
| 1 | 0.21247500  | -3.36057300 | 3.54782200  |
| 1 | 0.38841600  | -1.41420700 | 2.01949600  |

-----  
Method: M06-2X/6-31G(d,p) Key word: opt freq pop=full  
imaginary frequencies: 0 Energy: -1347.258113 Hartree  
-----

**8c,9,10a,11-Tetraphenyl-8c,9,10a,11-tetrahydro-10H-cyclobuta[3,4]cyclopenta[1,2-l]phenanthren-10-one. (5e)**

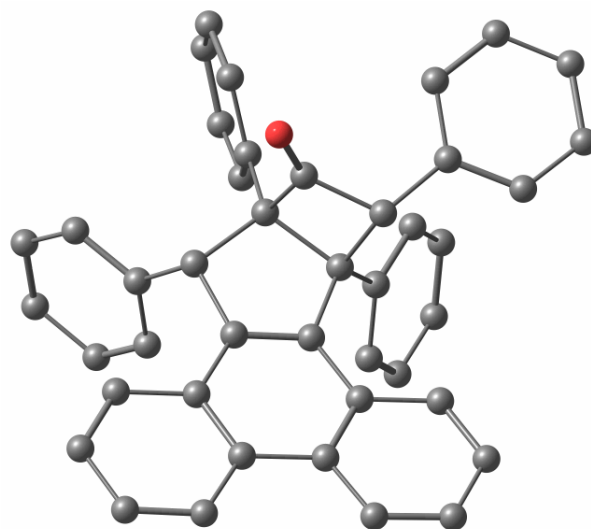

|   |             |             |             |
|---|-------------|-------------|-------------|
| 6 | 3.19777800  | 0.12964800  | -0.75462400 |
| 6 | 3.88059200  | -1.07246700 | -0.44477000 |
| 6 | 3.12568300  | -2.22022000 | 0.05357200  |
| 6 | 1.72536700  | -2.10922700 | 0.25149800  |
| 6 | 1.07067300  | -0.86331000 | -0.06912400 |
| 6 | 1.77045900  | 0.18428500  | -0.57639900 |
| 6 | 3.91490400  | 1.24355800  | -1.23770600 |
| 6 | 5.27926600  | 1.17751800  | -1.41699900 |
| 6 | 5.96275500  | -0.01015400 | -1.11492000 |
| 6 | 5.27706200  | -1.10810100 | -0.63853700 |
| 6 | 3.73954000  | -3.45671900 | 0.34304100  |
| 6 | 3.01076100  | -4.53229400 | 0.80557100  |
| 6 | 1.62733800  | -4.41460200 | 1.00573200  |
| 6 | 0.99851200  | -3.21890800 | 0.73387700  |
| 6 | -0.42967700 | -0.62508900 | -0.03103500 |
| 6 | -0.53029000 | 0.74036800  | -0.85431900 |
| 6 | 0.89955400  | 1.36721500  | -0.92586000 |
| 6 | -1.03359800 | -1.42291700 | -1.27921700 |
| 6 | -0.80456800 | -0.14357200 | -2.07856800 |
| 8 | -0.77951600 | 0.08949100  | -3.25636400 |
| 6 | -1.63642300 | 1.73740100  | -0.58536400 |
| 6 | -1.85858000 | 2.24447100  | 0.70198400  |
| 6 | -2.81850700 | 3.22567400  | 0.91901900  |
| 6 | -3.56873000 | 3.72540900  | -0.14306300 |
| 6 | -3.34159100 | 3.24529500  | -1.42761300 |
| 6 | -2.37947900 | 2.26136400  | -1.64763100 |
| 6 | -1.06523700 | -0.71391600 | 1.34074600  |
| 6 | -2.45512500 | -0.66036400 | 1.51295000  |
| 6 | -3.01926200 | -0.66516800 | 2.78457400  |
| 6 | -2.21107200 | -0.71608100 | 3.91612900  |
| 6 | -0.82934700 | -0.76022500 | 3.76266900  |
| 6 | -0.26536400 | -0.75968500 | 2.49007400  |
| 6 | -2.44638400 | -1.95111900 | -1.26540600 |
| 6 | -2.70415900 | -3.17864000 | -0.64816900 |
| 6 | -3.99910200 | -3.67754600 | -0.56812900 |
| 6 | -5.05867200 | -2.95774600 | -1.11521800 |
| 6 | -4.80941400 | -1.74660900 | -1.75342300 |
| 6 | -3.51162000 | -1.24762200 | -1.83270000 |
| 6 | 1.11251300  | 2.57712000  | -0.03830500 |
| 6 | 0.83675600  | 3.85266300  | -0.53655300 |

|   |             |             |             |
|---|-------------|-------------|-------------|
| 6 | 0.95515700  | 4.97411800  | 0.27699900  |
| 6 | 1.35586500  | 4.83311000  | 1.60345200  |
| 6 | 1.64035700  | 3.56694200  | 2.10656800  |
| 6 | 1.52064100  | 2.44557100  | 1.29012800  |
| 1 | 3.37823700  | 2.16239200  | -1.45338300 |
| 1 | 5.82338800  | 2.04059200  | -1.78626200 |
| 1 | 7.03762500  | -0.06673400 | -1.25347900 |
| 1 | 5.83534800  | -2.00817800 | -0.40987600 |
| 1 | 4.80632500  | -3.57892500 | 0.19722200  |
| 1 | 3.51193800  | -5.47161200 | 1.01537700  |
| 1 | 1.05546200  | -5.25969200 | 1.37496500  |
| 1 | -0.06718700 | -3.11064400 | 0.90971900  |
| 1 | 1.05893700  | 1.67384300  | -1.96913300 |
| 1 | -0.36055400 | -2.23082600 | -1.58819200 |
| 1 | -1.26654800 | 1.88246800  | 1.53577700  |
| 1 | -2.97462000 | 3.60559000  | 1.92360300  |
| 1 | -4.31790000 | 4.49169800  | 0.02941800  |
| 1 | -3.90814300 | 3.63765000  | -2.26635800 |
| 1 | -2.18982200 | 1.91157500  | -2.65806800 |
| 1 | -3.10989700 | -0.58379400 | 0.65367900  |
| 1 | -4.09882200 | -0.61855600 | 2.88634300  |
| 1 | -2.65310600 | -0.71693800 | 4.90746800  |
| 1 | -0.18301100 | -0.79579900 | 4.63396100  |
| 1 | 0.81486800  | -0.80104600 | 2.39193900  |
| 1 | -1.87793100 | -3.74665000 | -0.22860600 |
| 1 | -4.18055700 | -4.63029900 | -0.08099500 |
| 1 | -6.07075200 | -3.34431200 | -1.05283000 |
| 1 | -5.62671600 | -1.18580300 | -2.19564100 |
| 1 | -3.33316700 | -0.30048700 | -2.33237300 |
| 1 | 0.50400100  | 3.95913300  | -1.56629900 |
| 1 | 0.73194000  | 5.95790800  | -0.12365200 |
| 1 | 1.44777100  | 5.70674700  | 2.24095300  |
| 1 | 1.95752700  | 3.44997200  | 3.13810900  |
| 1 | 1.73950600  | 1.45823900  | 1.68795200  |

Method: M06-2X/6-31G(d,p) Key word: opt freq pop=full  
 imaginary frequencies: 0 Energy: -1730.678737 Hartree

### Ethyl 2-phenylacetate.

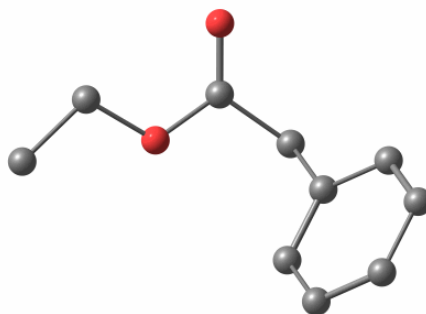

|   |             |             |             |
|---|-------------|-------------|-------------|
| 8 | 1.82606200  | 0.09331300  | -0.32438000 |
| 6 | 1.26800900  | -1.11716100 | -0.15431100 |
| 6 | 0.05689900  | -1.28718300 | -1.04920200 |
| 8 | 1.67568100  | -1.93505600 | 0.63108600  |
| 6 | -1.10649000 | -0.47438500 | -0.51997100 |
| 6 | -1.18591100 | 0.89684200  | -0.77291000 |

|   |             |             |             |
|---|-------------|-------------|-------------|
| 6 | -2.24013000 | 1.64723900  | -0.26400400 |
| 6 | -3.22583600 | 1.03567400  | 0.50764200  |
| 6 | -3.14959700 | -0.32897400 | 0.76843000  |
| 6 | -2.09350200 | -1.07917200 | 0.25809100  |
| 6 | 2.93117200  | 0.38756600  | 0.54275700  |
| 6 | 3.37294400  | 1.80197600  | 0.23963600  |
| 1 | 0.32034200  | -0.95922200 | -2.05881300 |
| 1 | -0.18692800 | -2.35021500 | -1.06762400 |
| 1 | -0.41001600 | 1.37319700  | -1.36560800 |
| 1 | -2.29391100 | 2.71142200  | -0.47097200 |
| 1 | -4.05015900 | 1.62085500  | 0.90248400  |
| 1 | -3.91348700 | -0.81269900 | 1.36889400  |
| 1 | -2.03237900 | -2.14426200 | 0.46431600  |
| 1 | 2.60511400  | 0.26915200  | 1.58031600  |
| 1 | 3.72568600  | -0.34257900 | 0.36155300  |
| 1 | 4.21750600  | 2.07539200  | 0.87636300  |
| 1 | 3.68170500  | 1.89336500  | -0.80419000 |
| 1 | 2.55723500  | 2.50499700  | 0.42268800  |

Method: M06-2X/6-31G(d,p) Key word: opt freq pop=full  
 imaginary frequencies: 0 Energy: -538.369447 Hartree

#### Ethanol.

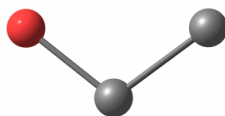

|   |             |             |             |
|---|-------------|-------------|-------------|
| 6 | -1.21576800 | -0.22146900 | 0.00015000  |
| 6 | 0.08874500  | 0.54955200  | -0.00013800 |
| 8 | 1.14007000  | -0.39787900 | -0.00031500 |
| 1 | -2.07077400 | 0.45911300  | -0.00019700 |
| 1 | -1.27268200 | -0.85933400 | -0.88493900 |
| 1 | -1.27277500 | -0.85865000 | 0.88571800  |
| 1 | 0.14006900  | 1.19897700  | 0.88648200  |
| 1 | 0.13973800  | 1.19886300  | -0.88687300 |
| 1 | 1.97799900  | 0.07555800  | 0.00225800  |

Method: M06-2X/6-31G(d,p) Key word: opt freq pop=full  
 imaginary frequencies: 0 Energy: -154.907494 Hartree

#### Int I (1e).

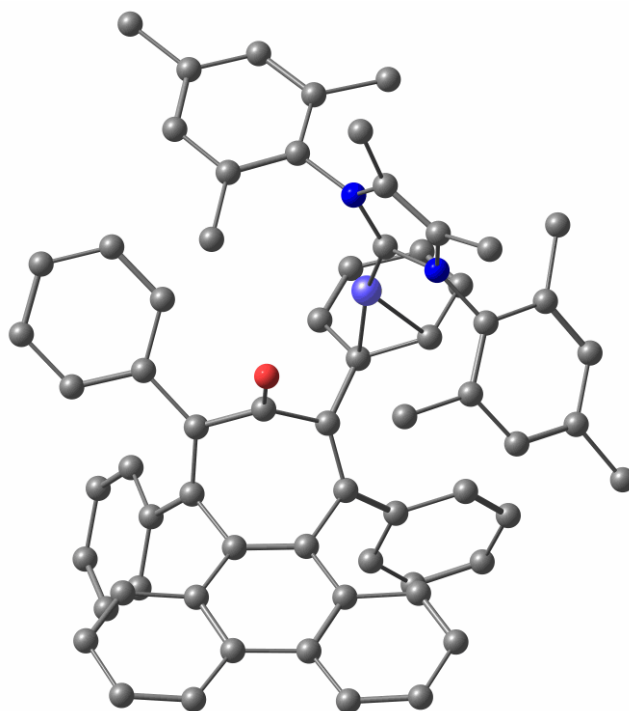

|    |              |              |              |
|----|--------------|--------------|--------------|
| 6  | 4.095832000  | -0.823868000 | 1.908214000  |
| 6  | 4.629592000  | 0.273763000  | 2.629752000  |
| 6  | 4.290956000  | 1.622604000  | 2.222897000  |
| 6  | 3.412140000  | 1.810903000  | 1.127443000  |
| 6  | 2.958118000  | 0.677798000  | 0.348323000  |
| 6  | 3.319702000  | -0.599165000 | 0.702436000  |
| 6  | 4.745769000  | 2.756952000  | 2.925131000  |
| 6  | 4.324854000  | 4.025783000  | 2.596731000  |
| 6  | 3.408608000  | 4.205960000  | 1.553191000  |
| 6  | 2.965056000  | 3.117656000  | 0.836683000  |
| 6  | 4.313374000  | -2.128106000 | 2.406385000  |
| 6  | 5.073049000  | -2.354507000 | 3.530543000  |
| 6  | 5.649593000  | -1.273061000 | 4.207685000  |
| 6  | 5.419638000  | 0.010552000  | 3.767092000  |
| 6  | 2.029997000  | 0.909476000  | -0.787187000 |
| 6  | 0.856646000  | 0.237882000  | -0.765561000 |
| 28 | -1.924599000 | 0.318133000  | -0.751786000 |
| 6  | 0.629019000  | -0.817377000 | 0.298463000  |
| 6  | 1.476612000  | -2.039104000 | 0.091361000  |
| 6  | 2.821921000  | -1.812299000 | -0.022706000 |
| 8  | -0.287693000 | -0.758871000 | 1.099016000  |
| 6  | 0.755266000  | -3.324706000 | 0.033318000  |
| 6  | 3.782812000  | -2.628647000 | -0.790610000 |
| 6  | -0.226539000 | 0.287191000  | -1.785994000 |
| 6  | -0.402947000 | -0.810133000 | -2.683944000 |
| 6  | -1.205467000 | -0.711128000 | -3.800841000 |
| 6  | -1.882581000 | 0.492068000  | -4.087031000 |
| 6  | -1.780654000 | 1.558653000  | -3.222886000 |
| 6  | -0.998144000 | 1.473566000  | -2.040962000 |
| 6  | 1.390156000  | -4.513378000 | 0.429035000  |
| 6  | 0.708936000  | -5.719543000 | 0.444519000  |
| 6  | -0.633023000 | -5.772363000 | 0.073392000  |
| 6  | -1.284023000 | -4.602925000 | -0.299020000 |

|   |              |              |              |
|---|--------------|--------------|--------------|
| 6 | -0.604744000 | -3.390110000 | -0.307236000 |
| 6 | 3.332135000  | -3.463397000 | -1.829590000 |
| 6 | 4.221235000  | -4.146420000 | -2.642635000 |
| 6 | 5.594557000  | -4.005706000 | -2.460020000 |
| 6 | 6.062133000  | -3.156876000 | -1.465017000 |
| 6 | 5.171388000  | -2.472693000 | -0.647422000 |
| 6 | 2.534344000  | 1.735488000  | -1.915674000 |
| 6 | 1.863389000  | 2.828337000  | -2.474352000 |
| 6 | 2.415512000  | 3.537547000  | -3.534554000 |
| 6 | 3.649517000  | 3.171379000  | -4.059851000 |
| 6 | 4.335461000  | 2.096191000  | -3.504707000 |
| 6 | 3.788023000  | 1.394193000  | -2.439233000 |
| 1 | 5.436198000  | 2.637931000  | 3.755083000  |
| 1 | 4.690791000  | 4.881447000  | 3.159004000  |
| 1 | 3.049493000  | 5.202795000  | 1.303557000  |
| 1 | 2.248502000  | 3.264639000  | 0.034208000  |
| 1 | 3.860318000  | -2.970189000 | 1.890030000  |
| 1 | 5.218504000  | -3.369237000 | 3.892483000  |
| 1 | 6.260206000  | -1.442433000 | 5.091142000  |
| 1 | 5.850421000  | 0.836000000  | 4.326271000  |
| 1 | 0.163423000  | -1.725442000 | -2.509596000 |
| 1 | -1.293591000 | -1.559640000 | -4.475190000 |
| 1 | -2.486995000 | 0.572174000  | -4.987780000 |
| 1 | -2.293215000 | 2.495536000  | -3.440310000 |
| 1 | -0.799036000 | 2.381413000  | -1.471185000 |
| 1 | 2.435220000  | -4.483085000 | 0.730195000  |
| 1 | 1.225505000  | -6.623455000 | 0.759129000  |
| 1 | -1.168102000 | -6.719366000 | 0.085644000  |
| 1 | -2.335284000 | -4.618925000 | -0.580167000 |
| 1 | -1.151158000 | -2.487862000 | -0.581790000 |
| 1 | 2.265555000  | -3.564276000 | -2.010593000 |
| 1 | 3.838051000  | -4.781955000 | -3.437425000 |
| 1 | 6.291732000  | -4.540258000 | -3.100602000 |
| 1 | 7.131135000  | -3.017226000 | -1.322603000 |
| 1 | 5.565141000  | -1.802023000 | 0.110573000  |
| 1 | 0.913027000  | 3.147832000  | -2.054665000 |
| 1 | 1.875421000  | 4.387460000  | -3.946900000 |
| 1 | 4.079051000  | 3.725972000  | -4.890758000 |
| 1 | 5.304460000  | 1.801819000  | -3.901313000 |
| 1 | 4.329759000  | 0.555576000  | -2.003084000 |
| 6 | -3.295352000 | 0.699586000  | 0.467616000  |
| 6 | -4.989694000 | 0.711125000  | 2.010699000  |
| 6 | -6.120315000 | 0.134587000  | 2.776263000  |
| 1 | -6.535079000 | 0.875968000  | 3.465739000  |
| 1 | -6.928748000 | -0.200629000 | 2.113836000  |
| 1 | -5.810775000 | -0.738068000 | 3.365417000  |
| 6 | -4.423257000 | 1.945855000  | 2.028901000  |
| 6 | -4.725444000 | 3.154613000  | 2.831906000  |
| 1 | -5.584435000 | 2.976126000  | 3.485416000  |
| 1 | -3.876693000 | 3.444676000  | 3.464876000  |
| 1 | -4.958381000 | 4.017199000  | 2.194661000  |
| 6 | -2.565913000 | 3.014055000  | 0.690833000  |
| 6 | -2.136014000 | 4.809947000  | -0.835930000 |
| 6 | -0.505031000 | 4.219347000  | 0.818645000  |
| 1 | -2.447843000 | 5.425583000  | -1.680720000 |
| 1 | 0.470855000  | 4.371182000  | 1.283457000  |
| 6 | -4.589375000 | -1.371840000 | 0.675641000  |
| 6 | -5.747406000 | -2.890281000 | -0.766596000 |
| 6 | -4.377211000 | -3.727344000 | 1.013138000  |
| 1 | -6.402013000 | -3.068725000 | -1.620288000 |

|   |              |              |              |
|---|--------------|--------------|--------------|
| 1 | -3.943159000 | -4.567989000 | 1.557368000  |
| 6 | -1.323678000 | 3.203527000  | 1.307107000  |
| 6 | -0.849822000 | 2.297445000  | 2.398270000  |
| 1 | 0.049088000  | 2.699168000  | 2.877208000  |
| 1 | -1.615376000 | 2.140171000  | 3.168125000  |
| 1 | -0.610239000 | 1.306082000  | 1.988370000  |
| 6 | -2.992398000 | 3.808899000  | -0.376894000 |
| 6 | -4.291367000 | 3.522352000  | -1.063756000 |
| 1 | -4.246165000 | 2.533485000  | -1.542802000 |
| 1 | -5.136748000 | 3.494935000  | -0.364624000 |
| 1 | -4.504672000 | 4.271393000  | -1.832798000 |
| 6 | -0.885775000 | 5.021734000  | -0.258023000 |
| 6 | 0.053999000  | 6.063717000  | -0.787489000 |
| 1 | -0.402248000 | 6.648136000  | -1.592904000 |
| 1 | 0.366622000  | 6.760447000  | -0.000195000 |
| 1 | 0.969654000  | 5.603556000  | -1.185868000 |
| 6 | -4.025190000 | -2.433181000 | 1.390440000  |
| 6 | -3.014373000 | -2.192332000 | 2.466893000  |
| 1 | -2.062704000 | -1.862924000 | 2.024881000  |
| 1 | -3.323128000 | -1.405361000 | 3.165394000  |
| 1 | -2.823861000 | -3.107909000 | 3.035700000  |
| 6 | -5.432807000 | -1.577294000 | -0.420240000 |
| 6 | -5.923068000 | -0.419796000 | -1.234379000 |
| 1 | -5.084517000 | 0.030748000  | -1.785262000 |
| 1 | -6.679819000 | -0.739126000 | -1.957597000 |
| 1 | -6.351755000 | 0.376971000  | -0.612588000 |
| 6 | -5.239661000 | -3.974986000 | -0.054575000 |
| 6 | -5.608974000 | -5.381895000 | -0.419014000 |
| 1 | -6.031422000 | -5.439862000 | -1.427384000 |
| 1 | -4.738724000 | -6.048452000 | -0.377502000 |
| 1 | -6.354989000 | -5.790643000 | 0.274390000  |
| 7 | -3.391908000 | 1.914083000  | 1.086868000  |
| 7 | -4.281161000 | -0.029187000 | 1.056003000  |

-----  
Method: M06-2X/6-31G(d,p) Key word: opt freq pop=full  
imaginary frequencies: 0 Energy: -2899.943432 Hartree  
-----

**Int I (phenyl analogue of 1h).**



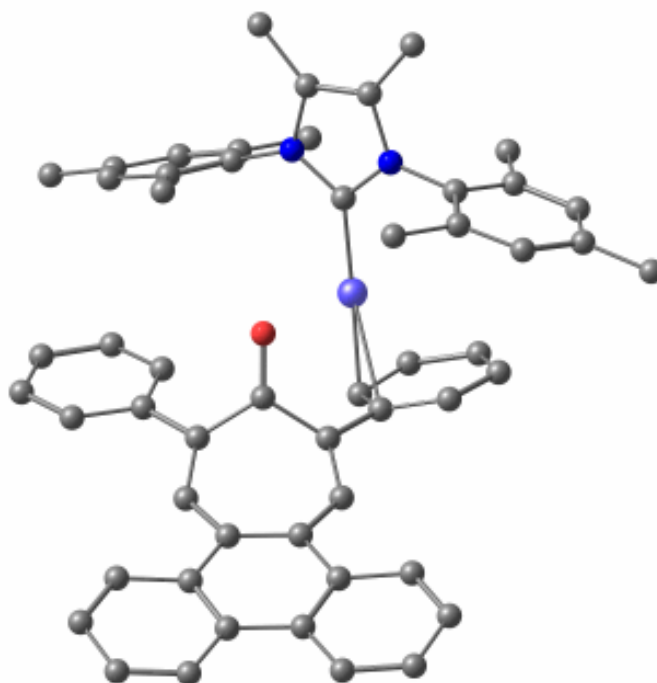

|    |              |              |              |
|----|--------------|--------------|--------------|
| 6  | -5.727163000 | -1.397503000 | -0.455232000 |
| 6  | -6.837184000 | -0.516698000 | -0.467293000 |
| 6  | -6.641745000 | 0.882559000  | -0.135299000 |
| 6  | -5.345713000 | 1.341010000  | 0.201561000  |
| 6  | -4.241307000 | 0.401605000  | 0.340134000  |
| 6  | -4.424493000 | -0.939803000 | 0.014996000  |
| 6  | -7.696545000 | 1.814046000  | -0.191411000 |
| 6  | -7.490451000 | 3.156103000  | 0.036469000  |
| 6  | -6.199964000 | 3.620604000  | 0.308314000  |
| 6  | -5.154553000 | 2.728012000  | 0.384912000  |
| 6  | -5.922188000 | -2.715266000 | -0.924223000 |
| 6  | -7.159521000 | -3.172401000 | -1.319016000 |
| 6  | -8.264653000 | -2.317826000 | -1.266973000 |
| 6  | -8.094844000 | -1.014022000 | -0.859294000 |
| 6  | -3.029597000 | 0.912791000  | 0.937338000  |
| 6  | -1.741743000 | 0.507827000  | 0.818953000  |
| 28 | 1.764777000  | 0.461814000  | 1.132618000  |
| 6  | -1.314656000 | -0.632874000 | -0.018396000 |
| 6  | -2.057832000 | -1.893285000 | 0.179012000  |
| 6  | -3.413943000 | -1.954798000 | 0.213618000  |
| 8  | -0.318512000 | -0.574794000 | -0.726701000 |
| 6  | -1.236349000 | -3.115810000 | 0.318146000  |
| 6  | -0.661310000 | 1.236347000  | 1.514615000  |
| 6  | 0.239294000  | 0.493343000  | 2.347193000  |
| 6  | 1.321133000  | 1.179310000  | 2.966637000  |
| 6  | 1.412319000  | 2.591410000  | 2.839666000  |
| 6  | 0.484377000  | 3.294092000  | 2.101053000  |
| 6  | -0.540406000 | 2.614108000  | 1.417526000  |
| 6  | -1.704861000 | -4.361718000 | -0.115244000 |
| 6  | -0.958688000 | -5.516129000 | 0.086002000  |
| 6  | 0.270743000  | -5.449243000 | 0.732401000  |
| 6  | 0.758809000  | -4.214473000 | 1.149696000  |
| 6  | 0.025710000  | -3.058298000 | 0.927793000  |

|   |              |              |              |
|---|--------------|--------------|--------------|
| 1 | -8.700808000 | 1.479133000  | -0.431982000 |
| 1 | -8.325093000 | 3.850601000  | -0.016813000 |
| 1 | -6.017040000 | 4.682508000  | 0.452192000  |
| 1 | -4.156014000 | 3.115583000  | 0.563599000  |
| 1 | -5.075093000 | -3.389019000 | -1.009330000 |
| 1 | -7.269924000 | -4.192587000 | -1.678028000 |
| 1 | -9.248057000 | -2.670607000 | -1.567272000 |
| 1 | -8.959326000 | -0.357054000 | -0.855001000 |
| 1 | -0.035949000 | -0.517124000 | 2.657550000  |
| 1 | 1.927028000  | 0.676272000  | 3.719197000  |
| 1 | 2.222467000  | 3.119728000  | 3.340637000  |
| 1 | 0.576645000  | 4.373100000  | 1.994050000  |
| 1 | -1.216714000 | 3.164698000  | 0.762912000  |
| 1 | -2.654776000 | -4.424599000 | -0.643614000 |
| 1 | -1.339113000 | -6.470885000 | -0.270033000 |
| 1 | 0.853602000  | -6.353410000 | 0.897434000  |
| 1 | 1.728400000  | -4.140257000 | 1.638712000  |
| 1 | 0.451225000  | -2.099204000 | 1.224251000  |
| 6 | 3.021472000  | 0.475465000  | -0.270581000 |
| 6 | 4.523616000  | -0.021955000 | -1.934400000 |
| 6 | 5.447702000  | -0.886871000 | -2.705903000 |
| 1 | 5.950808000  | -0.308185000 | -3.486272000 |
| 1 | 6.219118000  | -1.328385000 | -2.061832000 |
| 1 | 4.922238000  | -1.720385000 | -3.190170000 |
| 6 | 4.213630000  | 1.293328000  | -2.055975000 |
| 6 | 4.669159000  | 2.330040000  | -3.012385000 |
| 1 | 5.376714000  | 1.906944000  | -3.731570000 |
| 1 | 3.828586000  | 2.756176000  | -3.574652000 |
| 1 | 5.164014000  | 3.164991000  | -2.499868000 |
| 6 | 2.750491000  | 2.871368000  | -0.799596000 |
| 6 | 2.935080000  | 5.024746000  | 0.228593000  |
| 6 | 1.087831000  | 4.534936000  | -1.218197000 |
| 1 | 3.466876000  | 5.717203000  | 0.882866000  |
| 1 | 0.161904000  | 4.842169000  | -1.706787000 |
| 6 | 3.907923000  | -1.836759000 | -0.357206000 |
| 6 | 4.996783000  | -3.399333000 | 1.092252000  |
| 6 | 3.449496000  | -4.171553000 | -0.567328000 |
| 1 | 5.687604000  | -3.605641000 | 1.910615000  |
| 1 | 2.903647000  | -4.988144000 | -1.042567000 |
| 6 | 1.561860000  | 3.241211000  | -1.433000000 |
| 6 | 0.804949000  | 2.264039000  | -2.275265000 |
| 1 | -0.021218000 | 2.755792000  | -2.798841000 |
| 1 | 1.446130000  | 1.779148000  | -3.022266000 |
| 1 | 0.394471000  | 1.456970000  | -1.651074000 |
| 6 | 3.444184000  | 3.741622000  | 0.047076000  |
| 6 | 4.666279000  | 3.276304000  | 0.774605000  |
| 1 | 4.386639000  | 2.502538000  | 1.503365000  |
| 1 | 5.404743000  | 2.818870000  | 0.103605000  |
| 1 | 5.147597000  | 4.101110000  | 1.309304000  |
| 6 | 1.760212000  | 5.438692000  | -0.398151000 |
| 6 | 1.206456000  | 6.811060000  | -0.155418000 |
| 1 | 0.574453000  | 6.830827000  | 0.743052000  |
| 1 | 2.002910000  | 7.547601000  | -0.002652000 |
| 1 | 0.586587000  | 7.148807000  | -0.992771000 |
| 6 | 3.196684000  | -2.866488000 | -0.982399000 |
| 6 | 2.159824000  | -2.569069000 | -2.019849000 |
| 1 | 1.419036000  | -1.856023000 | -1.632626000 |
| 1 | 2.590825000  | -2.124169000 | -2.926984000 |
| 1 | 1.628553000  | -3.483085000 | -2.307216000 |
| 6 | 4.800715000  | -2.078538000 | 0.691166000  |

|   |              |              |              |
|---|--------------|--------------|--------------|
| 6 | 5.498213000  | -0.942979000 | 1.373099000  |
| 1 | 4.765918000  | -0.308051000 | 1.891292000  |
| 1 | 6.227203000  | -1.308326000 | 2.103019000  |
| 1 | 6.019977000  | -0.292802000 | 0.657616000  |
| 6 | 4.342160000  | -4.456950000 | 0.464522000  |
| 6 | 4.537611000  | -5.870793000 | 0.923349000  |
| 1 | 5.432755000  | -5.975104000 | 1.545100000  |
| 1 | 3.681464000  | -6.211142000 | 1.522435000  |
| 1 | 4.627900000  | -6.560667000 | 0.076608000  |
| 7 | 3.296702000  | 1.571364000  | -1.038427000 |
| 7 | 3.780769000  | -0.499840000 | -0.847615000 |
| 1 | -3.813138000 | -2.953570000 | 0.376081000  |
| 1 | -3.163784000 | 1.787278000  | 1.571348000  |

Method: M06-2X/6-31G(d,p) Key word: opt freq pop=full  
 imaginary frequencies: 0 Energy: -2438.359604 Hartree

**Int I (1c).**

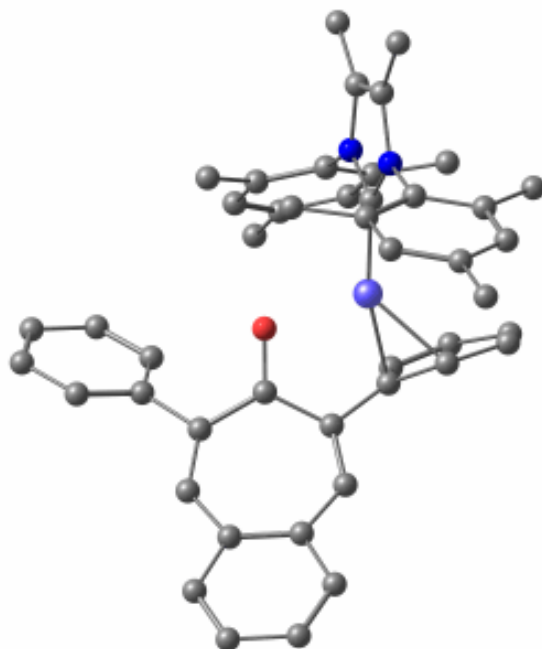

|    |              |              |              |
|----|--------------|--------------|--------------|
| 6  | -5.841946000 | 2.705175000  | -0.408761000 |
| 6  | -6.123631000 | 3.988909000  | 0.008768000  |
| 6  | -5.257664000 | 4.622132000  | 0.905286000  |
| 6  | -4.139691000 | 3.955106000  | 1.358991000  |
| 6  | -3.815270000 | 2.650677000  | 0.932622000  |
| 6  | -4.693072000 | 2.008061000  | 0.018237000  |
| 6  | -2.654891000 | 2.051612000  | 1.532341000  |
| 6  | -1.963850000 | 0.915085000  | 1.245412000  |
| 28 | 0.544367000  | 0.207136000  | 0.641140000  |
| 6  | -2.194816000 | 0.025053000  | 0.101155000  |
| 6  | -3.514453000 | -0.219437000 | -0.490568000 |
| 6  | -4.541240000 | 0.673015000  | -0.498925000 |
| 8  | -1.207119000 | -0.573411000 | -0.362010000 |
| 6  | -3.673931000 | -1.499736000 | -1.226158000 |

|   |              |              |              |
|---|--------------|--------------|--------------|
| 6 | -0.742394000 | 0.565675000  | 2.016169000  |
| 6 | -0.672510000 | -0.683804000 | 2.719634000  |
| 6 | 0.269083000  | -0.903189000 | 3.696915000  |
| 6 | 1.211590000  | 0.098229000  | 4.034017000  |
| 6 | 1.249601000  | 1.264735000  | 3.309375000  |
| 6 | 0.339835000  | 1.490312000  | 2.238623000  |
| 6 | -4.341322000 | -1.542026000 | -2.454832000 |
| 6 | -4.547093000 | -2.745105000 | -3.120041000 |
| 6 | -4.090210000 | -3.934622000 | -2.566612000 |
| 6 | -3.411245000 | -3.905843000 | -1.351561000 |
| 6 | -3.192253000 | -2.703498000 | -0.694548000 |
| 1 | -1.414248000 | -1.452574000 | 2.497593000  |
| 1 | 0.282890000  | -1.857360000 | 4.221394000  |
| 1 | 1.915688000  | -0.071786000 | 4.845850000  |
| 1 | 1.981778000  | 2.036366000  | 3.546145000  |
| 1 | 0.282870000  | 2.490147000  | 1.802516000  |
| 1 | -4.681126000 | -0.612744000 | -2.908535000 |
| 1 | -5.060741000 | -2.749102000 | -4.078635000 |
| 1 | -4.253693000 | -4.878605000 | -3.080914000 |
| 1 | -3.050775000 | -4.832407000 | -0.907047000 |
| 1 | -2.632915000 | -2.702430000 | 0.239461000  |
| 6 | 2.121337000  | -0.218677000 | -0.288121000 |
| 6 | 3.744905000  | -1.554012000 | -1.217657000 |
| 6 | 4.406640000  | -2.837095000 | -1.552834000 |
| 1 | 5.323124000  | -2.660445000 | -2.123825000 |
| 1 | 4.674858000  | -3.402549000 | -0.651027000 |
| 1 | 3.754368000  | -3.485041000 | -2.152661000 |
| 6 | 4.068212000  | -0.267446000 | -1.507310000 |
| 6 | 5.193580000  | 0.316449000  | -2.275264000 |
| 1 | 5.834471000  | -0.474325000 | -2.676639000 |
| 1 | 4.834988000  | 0.921419000  | -3.118243000 |
| 1 | 5.818735000  | 0.973313000  | -1.656532000 |
| 6 | 2.992999000  | 1.947266000  | -1.002310000 |
| 6 | 3.509629000  | 4.098851000  | -0.099110000 |
| 6 | 2.192237000  | 3.916878000  | -2.095457000 |
| 1 | 3.988144000  | 4.714378000  | 0.664133000  |
| 1 | 1.633170000  | 4.387357000  | -2.905135000 |
| 6 | 1.825446000  | -2.609721000 | 0.039780000  |
| 6 | 1.291181000  | -4.047673000 | 1.875104000  |
| 6 | 0.035249000  | -4.176945000 | -0.162359000 |
| 1 | 1.473099000  | -4.381526000 | 2.897647000  |
| 1 | -0.771683000 | -4.614717000 | -0.751998000 |
| 6 | 2.264884000  | 2.525717000  | -2.043372000 |
| 6 | 1.551230000  | 1.662292000  | -3.037714000 |
| 1 | 1.100065000  | 2.264133000  | -3.832531000 |
| 1 | 2.222463000  | 0.926544000  | -3.499105000 |
| 1 | 0.756858000  | 1.086683000  | -2.541731000 |
| 6 | 3.610280000  | 2.713473000  | -0.009040000 |
| 6 | 4.313185000  | 2.048741000  | 1.133670000  |
| 1 | 3.601825000  | 1.452945000  | 1.723151000  |
| 1 | 5.092951000  | 1.354686000  | 0.794957000  |
| 1 | 4.777973000  | 2.787923000  | 1.793786000  |
| 6 | 2.808380000  | 4.716760000  | -1.135746000 |
| 6 | 2.705021000  | 6.211595000  | -1.194919000 |
| 1 | 2.012357000  | 6.593038000  | -0.434190000 |
| 1 | 3.674859000  | 6.688329000  | -1.011173000 |
| 1 | 2.340544000  | 6.551378000  | -2.169801000 |
| 6 | 0.800923000  | -3.164779000 | -0.733844000 |
| 6 | 0.483016000  | -2.639111000 | -2.099265000 |
| 1 | -0.076068000 | -1.697411000 | -2.007712000 |

|   |              |              |              |
|---|--------------|--------------|--------------|
| 1 | 1.386144000  | -2.433217000 | -2.686932000 |
| 1 | -0.143775000 | -3.346681000 | -2.652447000 |
| 6 | 2.085752000  | -3.032331000 | 1.345605000  |
| 6 | 3.140524000  | -2.359111000 | 2.167700000  |
| 1 | 2.864727000  | -1.310990000 | 2.350523000  |
| 1 | 3.256081000  | -2.852998000 | 3.138263000  |
| 1 | 4.116501000  | -2.351562000 | 1.665598000  |
| 6 | 0.258093000  | -4.624163000 | 1.139590000  |
| 6 | -0.603645000 | -5.704563000 | 1.721814000  |
| 1 | -0.427067000 | -5.827760000 | 2.795242000  |
| 1 | -1.669070000 | -5.481411000 | 1.580650000  |
| 1 | -0.415076000 | -6.672969000 | 1.241271000  |
| 7 | 3.069111000  | 0.525150000  | -0.927264000 |
| 7 | 2.559738000  | -1.499511000 | -0.479002000 |
| 1 | -3.472932000 | 4.439119000  | 2.070405000  |
| 1 | -5.466935000 | 5.631319000  | 1.251076000  |
| 1 | -7.014452000 | 4.497461000  | -0.350410000 |
| 1 | -6.519290000 | 2.202777000  | -1.097512000 |
| 1 | -2.239928000 | 2.631074000  | 2.359728000  |
| 1 | -5.425139000 | 0.334775000  | -1.043532000 |

Method: M06-2X/6-31G(d,p) Key word: opt freq pop=full  
 imaginary frequencies: 0 Energy: -2131.396949 Hartree

**TS I (1e).**

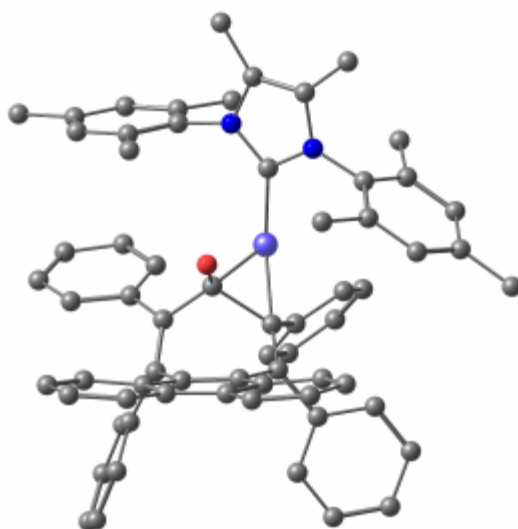

|   |             |              |             |
|---|-------------|--------------|-------------|
| 6 | 3.165364000 | -1.670624000 | 2.060092000 |
| 6 | 3.865169000 | -0.856356000 | 2.988003000 |
| 6 | 3.952551000 | 0.571145000  | 2.757552000 |
| 6 | 3.314216000 | 1.123467000  | 1.620291000 |
| 6 | 2.668820000 | 0.262635000  | 0.659341000 |
| 6 | 2.617544000 | -1.097288000 | 0.849462000 |
| 6 | 4.598928000 | 1.444438000  | 3.655632000 |
| 6 | 4.586239000 | 2.808557000  | 3.469840000 |
| 6 | 3.906646000 | 3.357847000  | 2.374381000 |
| 6 | 3.284939000 | 2.527399000  | 1.470221000 |
| 6 | 2.993277000 | -3.040401000 | 2.360936000 |

|    |              |              |              |
|----|--------------|--------------|--------------|
| 6  | 3.520659000  | -3.602051000 | 3.500269000  |
| 6  | 4.246539000  | -2.805464000 | 4.395021000  |
| 6  | 4.405059000  | -1.462175000 | 4.140883000  |
| 6  | 2.012296000  | 0.860546000  | -0.525002000 |
| 6  | 0.705035000  | 0.631476000  | -0.801023000 |
| 28 | -1.284017000 | 0.533150000  | -0.639722000 |
| 6  | 0.052099000  | -0.492169000 | 0.323986000  |
| 6  | 0.526334000  | -1.847097000 | -0.190501000 |
| 6  | 1.880090000  | -2.008469000 | -0.092596000 |
| 8  | 0.037813000  | -0.262659000 | 1.534428000  |
| 6  | -0.441227000 | -2.810374000 | -0.737617000 |
| 6  | 2.702505000  | -2.902999000 | -0.949584000 |
| 6  | 0.138810000  | 0.810868000  | -2.168736000 |
| 6  | 0.410742000  | -0.144902000 | -3.172961000 |
| 6  | -0.154302000 | -0.031142000 | -4.429658000 |
| 6  | -1.009898000 | 1.033466000  | -4.732591000 |
| 6  | -1.269013000 | 1.997279000  | -3.771733000 |
| 6  | -0.696388000 | 1.900953000  | -2.499401000 |
| 6  | -0.326772000 | -4.167741000 | -0.398185000 |
| 6  | -1.203864000 | -5.110590000 | -0.912675000 |
| 6  | -2.232849000 | -4.718598000 | -1.765566000 |
| 6  | -2.394112000 | -3.371126000 | -2.067077000 |
| 6  | -1.514168000 | -2.426098000 | -1.554065000 |
| 6  | 2.211395000  | -3.415899000 | -2.164864000 |
| 6  | 3.013052000  | -4.163818000 | -3.013366000 |
| 6  | 4.342079000  | -4.419349000 | -2.690700000 |
| 6  | 4.859101000  | -3.894928000 | -1.513227000 |
| 6  | 4.057109000  | -3.142921000 | -0.663519000 |
| 6  | 2.892202000  | 1.538639000  | -1.508640000 |
| 6  | 2.556133000  | 2.776933000  | -2.068839000 |
| 6  | 3.386463000  | 3.376504000  | -3.006719000 |
| 6  | 4.564237000  | 2.748568000  | -3.401577000 |
| 6  | 4.911040000  | 1.521311000  | -2.845994000 |
| 6  | 4.085949000  | 0.924419000  | -1.900356000 |
| 1  | 5.112129000  | 1.042573000  | 4.524907000  |
| 1  | 5.091044000  | 3.457087000  | 4.181990000  |
| 1  | 3.871220000  | 4.436388000  | 2.235548000  |
| 1  | 2.754357000  | 2.957187000  | 0.623534000  |
| 1  | 2.428133000  | -3.660527000 | 1.670384000  |
| 1  | 3.369232000  | -4.659160000 | 3.705040000  |
| 1  | 4.671490000  | -3.240865000 | 5.296350000  |
| 1  | 4.950812000  | -0.857928000 | 4.860036000  |
| 1  | 1.091956000  | -0.964196000 | -2.944780000 |
| 1  | 0.076386000  | -0.773913000 | -5.190141000 |
| 1  | -1.449450000 | 1.114725000  | -5.723879000 |
| 1  | -1.899877000 | 2.853958000  | -4.004665000 |
| 1  | -0.821758000 | 2.716092000  | -1.788917000 |
| 1  | 0.479468000  | -4.476882000 | 0.263708000  |
| 1  | -1.083774000 | -6.159057000 | -0.647525000 |
| 1  | -2.917100000 | -5.458187000 | -2.176957000 |
| 1  | -3.214550000 | -3.045971000 | -2.704005000 |
| 1  | -1.649452000 | -1.372901000 | -1.809979000 |
| 1  | 1.184886000  | -3.217795000 | -2.460634000 |
| 1  | 2.594858000  | -4.540766000 | -3.944125000 |
| 1  | 4.969256000  | -5.006818000 | -3.356902000 |
| 1  | 5.900754000  | -4.064029000 | -1.249639000 |
| 1  | 4.497146000  | -2.732379000 | 0.240450000  |
| 1  | 1.640760000  | 3.272249000  | -1.743008000 |
| 1  | 3.114653000  | 4.341805000  | -3.429001000 |
| 1  | 5.213062000  | 3.217846000  | -4.137521000 |

|   |              |              |              |
|---|--------------|--------------|--------------|
| 1 | 5.829617000  | 1.024699000  | -3.150295000 |
| 1 | 4.350862000  | -0.038976000 | -1.464863000 |
| 6 | -2.708316000 | 0.945025000  | 0.530424000  |
| 6 | -4.400550000 | 1.032057000  | 2.067005000  |
| 6 | -5.521520000 | 0.490293000  | 2.871069000  |
| 1 | -5.960892000 | 1.275740000  | 3.492887000  |
| 1 | -6.315047000 | 0.078913000  | 2.234334000  |
| 1 | -5.193129000 | -0.320298000 | 3.534399000  |
| 6 | -3.864760000 | 2.276701000  | 1.993950000  |
| 6 | -4.201293000 | 3.536858000  | 2.698259000  |
| 1 | -5.064916000 | 3.390390000  | 3.353299000  |
| 1 | -3.368501000 | 3.894072000  | 3.317341000  |
| 1 | -4.444068000 | 4.341714000  | 1.993084000  |
| 6 | -2.046064000 | 3.307049000  | 0.594932000  |
| 6 | -1.720203000 | 5.070849000  | -0.997171000 |
| 6 | -0.041879000 | 4.608140000  | 0.650443000  |
| 1 | -2.072001000 | 5.643190000  | -1.856528000 |
| 1 | 0.932226000  | 4.822146000  | 1.095487000  |
| 6 | -3.969499000 | -1.141583000 | 0.920945000  |
| 6 | -5.142102000 | -2.801920000 | -0.339751000 |
| 6 | -3.792323000 | -3.443867000 | 1.532619000  |
| 1 | -5.794176000 | -3.071044000 | -1.172167000 |
| 1 | -3.379554000 | -4.221548000 | 2.176707000  |
| 6 | -0.813580000 | 3.586406000  | 1.202280000  |
| 6 | -0.319543000 | 2.799966000  | 2.373189000  |
| 1 | 0.594729000  | 3.243364000  | 2.781983000  |
| 1 | -1.068555000 | 2.753052000  | 3.173763000  |
| 1 | -0.097492000 | 1.760382000  | 2.089728000  |
| 6 | -2.518571000 | 4.041736000  | -0.497461000 |
| 6 | -3.797260000 | 3.664898000  | -1.180585000 |
| 1 | -3.657544000 | 2.729727000  | -1.742032000 |
| 1 | -4.616533000 | 3.485576000  | -0.473906000 |
| 1 | -4.110657000 | 4.441531000  | -1.885258000 |
| 6 | -0.473374000 | 5.357922000  | -0.444606000 |
| 6 | 0.389287000  | 6.451863000  | -0.998115000 |
| 1 | 0.034849000  | 6.789494000  | -1.977357000 |
| 1 | 0.402582000  | 7.324230000  | -0.332781000 |
| 1 | 1.428535000  | 6.118854000  | -1.108133000 |
| 6 | -3.444431000 | -2.117957000 | 1.775990000  |
| 6 | -2.521693000 | -1.754918000 | 2.895487000  |
| 1 | -1.584696000 | -1.328380000 | 2.511732000  |
| 1 | -2.959962000 | -1.000208000 | 3.561427000  |
| 1 | -2.277407000 | -2.635762000 | 3.496943000  |
| 6 | -4.811099000 | -1.462074000 | -0.147351000 |
| 6 | -5.301933000 | -0.404161000 | -1.087426000 |
| 1 | -4.479492000 | -0.035582000 | -1.717491000 |
| 1 | -6.084777000 | -0.795379000 | -1.744740000 |
| 1 | -5.701685000 | 0.469555000  | -0.556399000 |
| 6 | -4.643162000 | -3.803404000 | 0.488784000  |
| 6 | -5.001058000 | -5.241689000 | 0.268464000  |
| 1 | -5.504243000 | -5.387784000 | -0.693685000 |
| 1 | -4.103656000 | -5.872969000 | 0.278639000  |
| 1 | -5.669590000 | -5.615069000 | 1.054266000  |
| 7 | -2.832047000 | 2.200313000  | 1.054440000  |
| 7 | -3.673827000 | 0.236624000  | 1.170282000  |

---

Method: M06-2X/6-31G(d,p) Key word: opt freq pop=full  
imaginary frequencies: -186.2651 cm<sup>-1</sup> Energy: -2899.924784 Hartree

---

TS I (phenyl analogue of 1h).

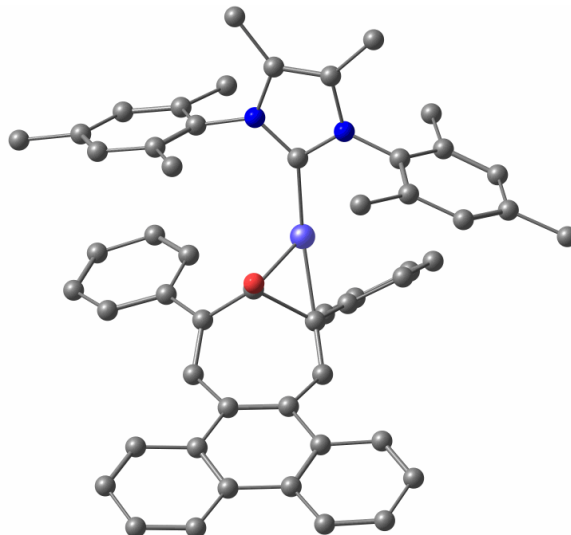

|    |              |              |              |
|----|--------------|--------------|--------------|
| 6  | -4.633102000 | -1.716126000 | -0.456094000 |
| 6  | -5.780128000 | -0.928086000 | -0.721435000 |
| 6  | -5.729139000 | 0.500621000  | -0.475676000 |
| 6  | -4.537092000 | 1.070601000  | 0.034557000  |
| 6  | -3.405072000 | 0.236632000  | 0.388404000  |
| 6  | -3.448481000 | -1.128246000 | 0.141910000  |
| 6  | -6.814848000 | 1.351110000  | -0.759179000 |
| 6  | -6.734732000 | 2.713768000  | -0.572514000 |
| 6  | -5.543483000 | 3.282610000  | -0.108087000 |
| 6  | -4.468791000 | 2.472586000  | 0.183522000  |
| 6  | -4.664267000 | -3.085932000 | -0.794940000 |
| 6  | -5.792133000 | -3.676096000 | -1.319567000 |
| 6  | -6.939578000 | -2.905588000 | -1.537033000 |
| 6  | -6.922542000 | -1.558168000 | -1.251080000 |
| 6  | -2.349034000 | 0.865102000  | 1.174905000  |
| 6  | -1.014939000 | 0.670483000  | 1.186494000  |
| 28 | 0.847494000  | 0.464123000  | 0.569263000  |
| 6  | -0.629747000 | -0.539944000 | -0.042116000 |
| 6  | -1.071076000 | -1.843615000 | 0.582795000  |
| 6  | -2.408913000 | -2.043328000 | 0.589953000  |
| 8  | -0.954684000 | -0.302537000 | -1.206646000 |
| 6  | -0.152021000 | -2.826400000 | 1.181525000  |
| 6  | -0.185928000 | 1.206367000  | 2.297580000  |
| 6  | 0.054032000  | 0.437392000  | 3.455464000  |
| 6  | 0.823790000  | 0.943011000  | 4.491304000  |
| 6  | 1.371647000  | 2.223438000  | 4.405396000  |
| 6  | 1.137172000  | 2.996729000  | 3.275467000  |
| 6  | 0.366298000  | 2.501144000  | 2.226398000  |
| 6  | -0.471094000 | -4.193377000 | 1.167741000  |
| 6  | 0.330994000  | -5.124934000 | 1.810266000  |
| 6  | 1.486633000  | -4.718878000 | 2.472731000  |
| 6  | 1.841912000  | -3.375208000 | 2.455026000  |
| 6  | 1.039739000  | -2.441837000 | 1.810012000  |
| 1  | -7.741707000 | 0.933800000  | -1.142761000 |
| 1  | -7.590547000 | 3.343622000  | -0.803409000 |
| 1  | -5.461484000 | 4.360035000  | 0.014190000  |
| 1  | -3.535493000 | 2.922288000  | 0.513109000  |
| 1  | -3.766047000 | -3.683894000 | -0.662935000 |



|   |              |              |              |
|---|--------------|--------------|--------------|
| 1 | -5.785271000 | -4.733561000 | -1.572701000 |
| 1 | -7.837568000 | -3.361586000 | -1.947116000 |
| 1 | -7.817148000 | -0.975383000 | -1.450704000 |
| 1 | -0.383035000 | -0.557576000 | 3.523036000  |
| 1 | 0.993453000  | 0.337641000  | 5.379035000  |
| 1 | 1.972776000  | 2.615319000  | 5.222386000  |
| 1 | 1.554109000  | 3.999818000  | 3.199092000  |
| 1 | 0.164427000  | 3.116875000  | 1.350455000  |
| 1 | -1.357958000 | -4.527330000 | 0.632179000  |
| 1 | 0.055403000  | -6.177529000 | 1.788707000  |
| 1 | 2.114408000  | -5.448087000 | 2.981155000  |
| 1 | 2.756315000  | -3.045363000 | 2.945941000  |
| 1 | 1.339508000  | -1.391107000 | 1.795969000  |
| 6 | 2.316169000  | 0.558169000  | -0.620211000 |
| 6 | 3.977653000  | 0.272629000  | -2.171037000 |
| 6 | 4.949473000  | -0.500320000 | -2.980551000 |
| 1 | 5.536247000  | 0.170266000  | -3.614976000 |
| 1 | 5.646683000  | -1.063290000 | -2.347450000 |
| 1 | 4.449572000  | -1.230160000 | -3.629527000 |
| 6 | 3.689038000  | 1.597479000  | -2.136835000 |
| 6 | 4.211137000  | 2.742285000  | -2.919943000 |
| 1 | 4.959427000  | 2.402986000  | -3.642034000 |
| 1 | 3.406471000  | 3.241337000  | -3.474869000 |
| 1 | 4.677453000  | 3.503230000  | -2.281854000 |
| 6 | 2.055625000  | 2.996788000  | -0.875339000 |
| 6 | 2.016567000  | 5.044320000  | 0.359023000  |
| 6 | 0.307690000  | 4.578361000  | -1.259105000 |
| 1 | 2.451084000  | 5.703648000  | 1.112044000  |
| 1 | -0.603042000 | 4.870364000  | -1.783098000 |
| 6 | 3.106993000  | -1.753502000 | -1.033408000 |
| 6 | 3.979736000  | -3.687258000 | 0.064869000  |
| 6 | 2.339504000  | -3.922172000 | -1.667535000 |
| 1 | 4.630757000  | -4.136693000 | 0.816888000  |
| 1 | 1.704908000  | -4.556535000 | -2.287202000 |
| 6 | 0.892459000  | 3.350651000  | -1.568037000 |
| 6 | 0.285112000  | 2.429364000  | -2.578530000 |
| 1 | -0.473973000 | 2.949065000  | -3.171190000 |
| 1 | 1.041226000  | 2.025553000  | -3.264772000 |
| 1 | -0.192161000 | 1.563795000  | -2.092751000 |
| 6 | 2.629407000  | 3.820207000  | 0.097722000  |
| 6 | 3.828892000  | 3.371113000  | 0.874870000  |
| 1 | 3.591738000  | 2.472699000  | 1.461509000  |
| 1 | 4.676381000  | 3.109676000  | 0.229442000  |
| 1 | 4.159411000  | 4.151110000  | 1.568133000  |
| 6 | 0.858582000  | 5.439838000  | -0.310343000 |
| 6 | 0.232382000  | 6.774468000  | -0.037796000 |
| 1 | 0.448470000  | 7.121466000  | 0.978141000  |
| 1 | 0.612242000  | 7.537310000  | -0.729423000 |
| 1 | -0.855072000 | 6.739725000  | -0.161991000 |
| 6 | 2.289430000  | -2.539910000 | -1.849564000 |
| 6 | 1.378244000  | -1.930951000 | -2.869368000 |
| 1 | 0.477741000  | -1.512090000 | -2.397976000 |
| 1 | 1.854956000  | -1.105068000 | -3.412414000 |
| 1 | 1.058417000  | -2.681808000 | -3.598701000 |
| 6 | 3.958204000  | -2.303581000 | -0.070038000 |
| 6 | 4.784197000  | -1.419247000 | 0.813570000  |
| 1 | 4.142791000  | -0.769487000 | 1.425452000  |
| 1 | 5.410606000  | -2.013583000 | 1.486493000  |
| 1 | 5.439790000  | -0.751522000 | 0.239288000  |
| 6 | 3.174012000  | -4.510804000 | -0.722213000 |

|   |              |              |              |
|---|--------------|--------------|--------------|
| 6 | 3.188242000  | -5.995019000 | -0.525365000 |
| 1 | 4.204489000  | -6.372818000 | -0.365270000 |
| 1 | 2.596581000  | -6.268067000 | 0.358838000  |
| 1 | 2.758678000  | -6.520688000 | -1.384338000 |
| 7 | 2.682995000  | 1.748428000  | -1.178805000 |
| 7 | 3.129763000  | -0.338558000 | -1.239176000 |
| 1 | -2.772098000 | -2.969039000 | 1.038376000  |
| 1 | -2.724527000 | 1.543967000  | 1.947892000  |

Method: M06-2X/6-31G(d,p) Key word: opt freq pop=full  
 imaginary frequencies:  $-162.8271 \text{ cm}^{-1}$  Energy:  $-2438.325062 \text{ Hartree}$

**TS I (1c).**

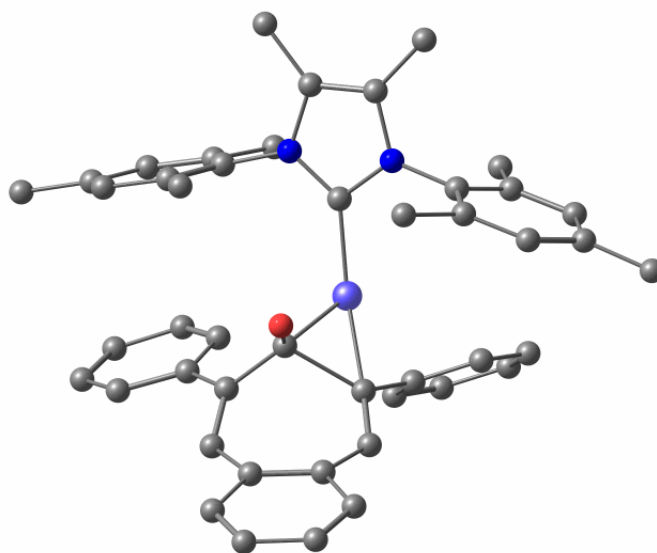

|    |              |              |              |
|----|--------------|--------------|--------------|
| 6  | -0.774556000 | 5.515116000  | -1.615087000 |
| 6  | 0.183597000  | 6.356544000  | -2.150265000 |
| 6  | 1.529520000  | 6.127861000  | -1.867379000 |
| 6  | 1.881758000  | 5.068752000  | -1.050513000 |
| 6  | 0.932720000  | 4.172869000  | -0.534726000 |
| 6  | -0.436609000 | 4.400484000  | -0.831868000 |
| 6  | 1.418409000  | 3.177456000  | 0.418774000  |
| 6  | 0.990013000  | 1.934368000  | 0.711498000  |
| 28 | 0.418907000  | 0.075369000  | 0.424746000  |
| 6  | -0.335283000 | 1.537112000  | -0.468892000 |
| 6  | -1.550501000 | 2.300856000  | 0.002869000  |
| 6  | -1.532499000 | 3.624079000  | -0.268199000 |
| 8  | -0.037185000 | 1.606566000  | -1.660824000 |
| 6  | -2.683475000 | 1.682555000  | 0.711671000  |
| 6  | 1.522986000  | 1.219841000  | 1.898139000  |
| 6  | 0.746063000  | 1.050215000  | 3.063877000  |
| 6  | 1.265636000  | 0.391987000  | 4.170264000  |
| 6  | 2.568840000  | -0.102031000 | 4.151084000  |
| 6  | 3.348836000  | 0.064844000  | 3.011427000  |
| 6  | 2.835697000  | 0.709920000  | 1.892275000  |
| 6  | -3.979041000 | 2.203927000  | 0.575253000  |
| 6  | -5.036779000 | 1.703814000  | 1.320778000  |
| 6  | -4.831862000 | 0.660560000  | 2.219812000  |

|   |              |              |              |
|---|--------------|--------------|--------------|
| 6 | -3.563839000 | 0.103448000  | 2.333543000  |
| 6 | -2.505547000 | 0.597552000  | 1.580370000  |
| 1 | -0.259347000 | 1.467172000  | 3.092512000  |
| 1 | 0.652859000  | 0.277754000  | 5.061797000  |
| 1 | 2.973800000  | -0.609655000 | 5.023344000  |
| 1 | 4.368588000  | -0.316680000 | 2.982851000  |
| 1 | 3.442246000  | 0.832305000  | 0.995291000  |
| 1 | -4.155661000 | 3.006752000  | -0.137435000 |
| 1 | -6.030157000 | 2.131382000  | 1.197713000  |
| 1 | -5.660042000 | 0.269657000  | 2.807595000  |
| 1 | -3.393007000 | -0.730426000 | 3.012872000  |
| 1 | -1.519170000 | 0.134759000  | 1.664495000  |
| 6 | 0.224054000  | -1.609733000 | -0.420000000 |
| 6 | -0.348601000 | -3.504044000 | -1.575521000 |
| 6 | -1.276969000 | -4.499201000 | -2.162921000 |
| 1 | -0.715278000 | -5.285570000 | -2.675563000 |
| 1 | -1.902209000 | -4.975357000 | -1.397085000 |
| 1 | -1.958972000 | -4.041098000 | -2.889922000 |
| 6 | 1.005170000  | -3.428558000 | -1.580695000 |
| 6 | 2.043579000  | -4.295013000 | -2.185914000 |
| 1 | 1.583640000  | -5.135151000 | -2.714180000 |
| 1 | 2.658275000  | -3.736859000 | -2.903518000 |
| 1 | 2.726795000  | -4.701254000 | -1.429480000 |
| 6 | 2.671811000  | -1.832396000 | -0.650866000 |
| 6 | 4.685578000  | -1.925736000 | 0.631130000  |
| 6 | 4.566371000  | -0.546258000 | -1.328013000 |
| 1 | 5.244544000  | -2.303466000 | 1.489105000  |
| 1 | 5.033043000  | 0.156181000  | -2.019096000 |
| 6 | -2.193441000 | -2.127866000 | -0.662593000 |
| 6 | -4.194816000 | -2.509468000 | 0.583372000  |
| 6 | -4.260229000 | -1.222544000 | -1.438695000 |
| 1 | -4.702976000 | -2.930518000 | 1.452336000  |
| 1 | -4.823274000 | -0.636857000 | -2.166670000 |
| 6 | 3.246832000  | -0.937919000 | -1.558337000 |
| 6 | 2.459564000  | -0.395034000 | -2.710010000 |
| 1 | 3.110659000  | 0.139832000  | -3.408146000 |
| 1 | 1.945592000  | -1.192729000 | -3.262468000 |
| 1 | 1.681091000  | 0.302871000  | -2.363318000 |
| 6 | 3.364582000  | -2.327566000 | 0.458013000  |
| 6 | 2.678161000  | -3.187613000 | 1.473962000  |
| 1 | 1.958679000  | -2.584740000 | 2.048725000  |
| 1 | 2.112661000  | -4.011444000 | 1.020895000  |
| 1 | 3.398781000  | -3.610035000 | 2.181498000  |
| 6 | 5.297493000  | -1.027950000 | -0.243781000 |
| 6 | 6.697227000  | -0.559081000 | 0.016710000  |
| 1 | 6.717504000  | 0.167787000  | 0.839966000  |
| 1 | 7.352804000  | -1.388223000 | 0.306103000  |
| 1 | 7.131421000  | -0.071149000 | -0.861640000 |
| 6 | -2.889416000 | -1.383857000 | -1.622106000 |
| 6 | -2.178065000 | -0.768137000 | -2.786340000 |
| 1 | -1.481458000 | 0.017029000  | -2.459593000 |
| 1 | -1.580576000 | -1.504921000 | -3.338888000 |
| 1 | -2.891356000 | -0.318850000 | -3.483816000 |
| 6 | -2.820152000 | -2.690630000 | 0.450208000  |
| 6 | -2.022347000 | -3.416973000 | 1.490061000  |
| 1 | -1.289880000 | -2.743769000 | 1.958402000  |
| 1 | -2.671965000 | -3.816580000 | 2.275277000  |
| 1 | -1.446182000 | -4.250041000 | 1.066661000  |
| 6 | -4.928405000 | -1.780767000 | -0.349176000 |
| 6 | -6.400656000 | -1.564459000 | -0.177485000 |

|   |              |              |              |
|---|--------------|--------------|--------------|
| 1 | -6.787728000 | -2.097583000 | 0.697239000  |
| 1 | -6.620820000 | -0.497783000 | -0.042620000 |
| 1 | -6.963476000 | -1.900943000 | -1.056485000 |
| 7 | 1.329495000  | -2.271674000 | -0.869012000 |
| 7 | -0.801586000 | -2.385638000 | -0.863810000 |
| 1 | 2.928479000  | 4.908155000  | -0.794424000 |
| 1 | 2.296331000  | 6.787219000  | -2.267103000 |
| 1 | -0.114023000 | 7.196908000  | -2.772884000 |
| 1 | -1.829733000 | 5.701780000  | -1.811562000 |
| 1 | 2.235405000  | 3.551398000  | 1.047639000  |
| 1 | -2.411627000 | 4.213093000  | 0.002779000  |

Method: M06-2X/6-31G(d,p) Key word: opt freq pop=full  
 imaginary frequencies:  $-173.6447 \text{ cm}^{-1}$  Energy:  $-2131.351951 \text{ Hartree}$

### Int II (1e).

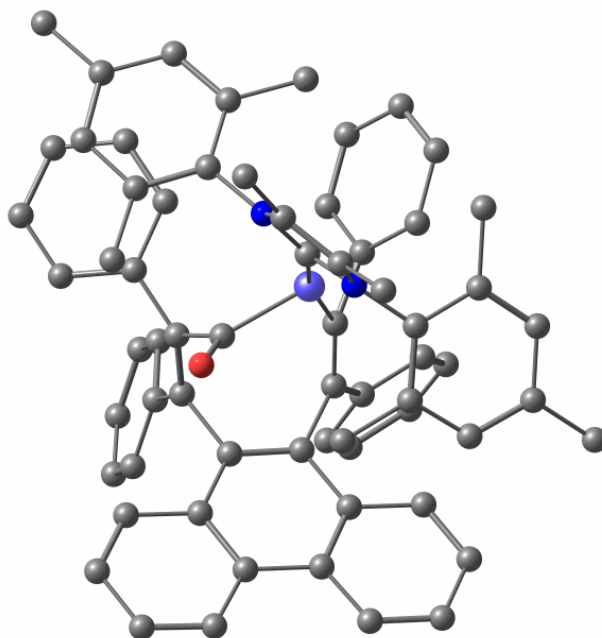

|    |              |              |              |
|----|--------------|--------------|--------------|
| 6  | -2.512865000 | -0.618771000 | -2.707516000 |
| 6  | -3.321807000 | 0.499746000  | -3.032049000 |
| 6  | -3.793326000 | 1.362531000  | -1.966117000 |
| 6  | -3.422858000 | 1.078369000  | -0.625216000 |
| 6  | -2.584179000 | -0.061130000 | -0.325358000 |
| 6  | -2.166734000 | -0.888363000 | -1.334371000 |
| 6  | -4.607083000 | 2.487469000  | -2.213746000 |
| 6  | -5.055618000 | 3.294265000  | -1.190568000 |
| 6  | -4.690518000 | 3.011330000  | 0.132196000  |
| 6  | -3.877971000 | 1.933464000  | 0.402281000  |
| 6  | -2.034833000 | -1.445455000 | -3.746245000 |
| 6  | -2.351486000 | -1.196001000 | -5.061715000 |
| 6  | -3.157250000 | -0.096097000 | -5.384631000 |
| 6  | -3.625252000 | 0.732088000  | -4.388318000 |
| 6  | -2.125819000 | -0.257533000 | 1.082655000  |
| 6  | -0.832744000 | -0.029830000 | 1.362725000  |
| 28 | 0.751017000  | 0.544920000  | 0.501272000  |

|   |              |              |              |
|---|--------------|--------------|--------------|
| 6 | 0.481741000  | -0.412670000 | -1.080992000 |
| 6 | 0.027948000  | -1.838689000 | -0.884083000 |
| 6 | -1.299253000 | -2.057761000 | -0.987641000 |
| 8 | 0.683739000  | 0.036334000  | -2.188853000 |
| 6 | 1.055954000  | -2.836987000 | -0.540439000 |
| 6 | -2.012053000 | -3.287838000 | -0.574631000 |
| 6 | -0.065947000 | -0.110132000 | 2.590190000  |
| 6 | 0.288280000  | -1.337430000 | 3.197350000  |
| 6 | 1.223495000  | -1.377212000 | 4.213568000  |
| 6 | 1.843979000  | -0.204535000 | 4.662871000  |
| 6 | 1.500930000  | 1.011759000  | 4.092192000  |
| 6 | 0.558358000  | 1.067756000  | 3.061924000  |
| 6 | 1.130481000  | -4.039975000 | -1.253831000 |
| 6 | 2.039688000  | -5.023732000 | -0.888978000 |
| 6 | 2.887143000  | -4.824976000 | 0.197750000  |
| 6 | 2.849704000  | -3.616950000 | 0.887354000  |
| 6 | 1.957936000  | -2.620763000 | 0.508895000  |
| 6 | -1.625684000 | -4.006610000 | 0.564788000  |
| 6 | -2.381719000 | -5.076497000 | 1.022696000  |
| 6 | -3.537644000 | -5.460783000 | 0.349428000  |
| 6 | -3.929648000 | -4.763454000 | -0.788194000 |
| 6 | -3.179562000 | -3.684870000 | -1.240686000 |
| 6 | -3.127328000 | -0.696038000 | 2.085034000  |
| 6 | -3.086722000 | -0.265967000 | 3.417700000  |
| 6 | -4.008437000 | -0.733274000 | 4.345515000  |
| 6 | -4.991703000 | -1.641740000 | 3.964318000  |
| 6 | -5.050280000 | -2.068538000 | 2.641594000  |
| 6 | -4.137852000 | -1.590802000 | 1.710346000  |
| 1 | -4.902472000 | 2.726727000  | -3.231661000 |
| 1 | -5.693048000 | 4.146955000  | -1.413515000 |
| 1 | -5.039539000 | 3.645799000  | 0.944487000  |
| 1 | -3.579528000 | 1.728716000  | 1.427331000  |
| 1 | -1.389346000 | -2.282040000 | -3.484941000 |
| 1 | -1.970627000 | -1.844909000 | -5.846700000 |
| 1 | -3.409385000 | 0.110330000  | -6.422208000 |
| 1 | -4.240942000 | 1.583035000  | -4.666986000 |
| 1 | -0.198578000 | -2.247067000 | 2.846822000  |
| 1 | 1.476244000  | -2.331102000 | 4.672668000  |
| 1 | 2.578664000  | -0.248649000 | 5.463135000  |
| 1 | 1.960516000  | 1.933149000  | 4.447105000  |
| 1 | 0.244525000  | 2.028880000  | 2.648102000  |
| 1 | 0.447172000  | -4.202393000 | -2.085668000 |
| 1 | 2.075637000  | -5.957245000 | -1.446137000 |
| 1 | 3.577611000  | -5.608775000 | 0.503873000  |
| 1 | 3.523291000  | -3.441819000 | 1.724675000  |
| 1 | 1.936548000  | -1.672964000 | 1.049440000  |
| 1 | -0.731458000 | -3.704143000 | 1.106721000  |
| 1 | -2.072648000 | -5.606257000 | 1.920865000  |
| 1 | -4.131506000 | -6.296259000 | 0.712679000  |
| 1 | -4.830687000 | -5.053602000 | -1.324161000 |
| 1 | -3.508732000 | -3.130392000 | -2.117626000 |
| 1 | -2.327534000 | 0.453778000  | 3.719638000  |
| 1 | -3.961737000 | -0.380668000 | 5.373808000  |
| 1 | -5.709841000 | -2.010678000 | 4.693180000  |
| 1 | -5.808622000 | -2.782917000 | 2.327344000  |
| 1 | -4.183828000 | -1.939843000 | 0.679482000  |
| 6 | 2.222846000  | 1.553615000  | -0.217359000 |
| 6 | 4.019891000  | 2.425843000  | -1.315128000 |
| 6 | 5.376288000  | 2.409320000  | -1.911573000 |
| 1 | 5.674411000  | 3.419740000  | -2.206282000 |

|   |              |              |              |
|---|--------------|--------------|--------------|
| 1 | 6.118273000  | 2.031578000  | -1.196611000 |
| 1 | 5.432034000  | 1.770022000  | -2.801444000 |
| 6 | 3.111224000  | 3.425723000  | -1.174511000 |
| 6 | 3.126683000  | 4.839978000  | -1.617642000 |
| 1 | 4.090256000  | 5.088750000  | -2.071673000 |
| 1 | 2.345663000  | 5.035637000  | -2.363470000 |
| 1 | 2.953949000  | 5.533784000  | -0.785732000 |
| 6 | 0.894819000  | 3.589720000  | 0.017134000  |
| 6 | -0.093773000 | 4.789190000  | 1.839874000  |
| 6 | -1.384306000 | 4.288752000  | -0.117445000 |
| 1 | -0.013733000 | 5.234270000  | 2.832506000  |
| 1 | -2.328293000 | 4.329431000  | -0.662489000 |
| 6 | 4.128349000  | 0.033288000  | -0.599886000 |
| 6 | 5.469451000  | -1.439531000 | 0.730329000  |
| 6 | 4.899706000  | -2.037201000 | -1.515065000 |
| 1 | 5.966680000  | -1.671104000 | 1.673378000  |
| 1 | 4.933020000  | -2.747802000 | -2.342946000 |
| 6 | -0.295376000 | 3.657362000  | -0.716038000 |
| 6 | -0.419666000 | 3.064804000  | -2.083110000 |
| 1 | -1.393484000 | 3.307894000  | -2.520899000 |
| 1 | 0.366864000  | 3.425957000  | -2.758436000 |
| 1 | -0.319942000 | 1.973842000  | -2.055535000 |
| 6 | 1.022138000  | 4.164779000  | 1.287752000  |
| 6 | 2.311544000  | 4.080071000  | 2.047737000  |
| 1 | 2.653986000  | 3.040162000  | 2.128536000  |
| 1 | 3.121404000  | 4.637890000  | 1.559347000  |
| 1 | 2.193761000  | 4.482631000  | 3.059174000  |
| 6 | -1.309305000 | 4.842473000  | 1.158425000  |
| 6 | -2.519865000 | 5.456001000  | 1.793155000  |
| 1 | -2.250543000 | 6.246904000  | 2.501545000  |
| 1 | -3.195316000 | 5.879876000  | 1.042002000  |
| 1 | -3.090621000 | 4.699956000  | 2.348975000  |
| 6 | 4.188569000  | -0.849675000 | -1.683663000 |
| 6 | 3.515860000  | -0.581540000 | -2.995465000 |
| 1 | 2.693508000  | -1.290527000 | -3.151034000 |
| 1 | 3.073737000  | 0.415955000  | -3.051407000 |
| 1 | 4.224277000  | -0.709108000 | -3.823013000 |
| 6 | 4.758570000  | -0.248138000 | 0.619702000  |
| 6 | 4.648065000  | 0.682402000  | 1.787992000  |
| 1 | 3.660309000  | 0.591846000  | 2.265212000  |
| 1 | 5.404946000  | 0.449388000  | 2.543460000  |
| 1 | 4.766915000  | 1.733739000  | 1.494117000  |
| 6 | 5.547383000  | -2.347605000 | -0.323909000 |
| 6 | 6.289354000  | -3.640801000 | -0.179722000 |
| 1 | 6.676583000  | -3.773046000 | 0.836223000  |
| 1 | 5.629208000  | -4.488550000 | -0.403689000 |
| 1 | 7.137528000  | -3.699650000 | -0.872491000 |
| 7 | 2.022280000  | 2.868025000  | -0.501493000 |
| 7 | 3.447235000  | 1.287582000  | -0.730170000 |

-----  
Method: M06-2X/6-31G(d,p) Key word: opt freq pop=full  
imaginary frequencies: 0 Energy: -2899.956298 Hartree  
-----

**Int II (phenyl analogue of 1h).**

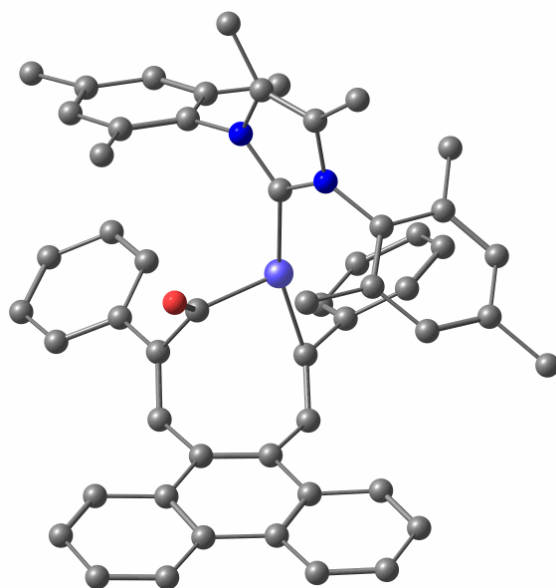

|    |              |              |              |
|----|--------------|--------------|--------------|
| 6  | 3.324026000  | 3.088180000  | -0.443670000 |
| 6  | 4.625096000  | 2.600706000  | -0.721931000 |
| 6  | 5.031989000  | 1.326316000  | -0.163140000 |
| 6  | 4.129956000  | 0.615071000  | 0.669448000  |
| 6  | 2.828592000  | 1.165584000  | 0.994170000  |
| 6  | 2.436969000  | 2.359878000  | 0.432637000  |
| 6  | 6.290551000  | 0.754449000  | -0.434578000 |
| 6  | 6.657197000  | -0.468538000 | 0.082472000  |
| 6  | 5.758658000  | -1.181571000 | 0.885739000  |
| 6  | 4.517830000  | -0.650194000 | 1.162698000  |
| 6  | 2.907423000  | 4.299840000  | -1.033328000 |
| 6  | 3.748397000  | 5.029723000  | -1.842661000 |
| 6  | 5.043653000  | 4.561847000  | -2.097806000 |
| 6  | 5.464712000  | 3.369233000  | -1.551136000 |
| 6  | 2.023575000  | 0.444197000  | 1.994430000  |
| 6  | 0.770157000  | 0.000856000  | 1.856654000  |
| 28 | -0.412194000 | -0.402411000 | 0.473406000  |
| 6  | -0.080642000 | 1.211653000  | -0.358338000 |
| 6  | -0.054613000 | 2.459112000  | 0.482510000  |
| 6  | 1.144896000  | 2.979424000  | 0.780119000  |
| 8  | 0.137467000  | 1.289471000  | -1.550308000 |
| 6  | -1.324248000 | 3.055276000  | 0.929108000  |
| 6  | -0.013941000 | -0.788133000 | 2.801200000  |
| 6  | -0.955865000 | -0.203445000 | 3.673426000  |
| 6  | -1.789062000 | -0.995320000 | 4.445820000  |
| 6  | -1.727210000 | -2.389161000 | 4.359466000  |
| 6  | -0.815393000 | -2.981699000 | 3.495852000  |
| 6  | 0.032970000  | -2.192629000 | 2.720932000  |
| 6  | -1.479862000 | 4.447480000  | 0.947833000  |
| 6  | -2.645974000 | 5.027406000  | 1.426924000  |
| 6  | -3.682524000 | 4.225892000  | 1.897060000  |
| 6  | -3.548923000 | 2.841467000  | 1.861390000  |
| 6  | -2.387762000 | 2.258064000  | 1.369734000  |
| 1  | 6.995940000  | 1.282161000  | -1.070516000 |
| 1  | 7.638385000  | -0.880519000 | -0.141752000 |
| 1  | 6.038932000  | -2.152221000 | 1.291365000  |
| 1  | 3.806814000  | -1.221869000 | 1.756000000  |

|   |              |              |              |
|---|--------------|--------------|--------------|
| 1 | 1.892387000  | 4.646070000  | -0.850512000 |
| 1 | 3.405311000  | 5.961302000  | -2.286563000 |
| 1 | 5.715425000  | 5.132943000  | -2.734391000 |
| 1 | 6.470569000  | 3.023277000  | -1.773069000 |
| 1 | -1.011675000 | 0.882873000  | 3.728807000  |
| 1 | -2.497525000 | -0.527103000 | 5.126113000  |
| 1 | -2.385966000 | -3.003568000 | 4.968668000  |
| 1 | -0.749700000 | -4.066872000 | 3.424836000  |
| 1 | 0.771718000  | -2.648991000 | 2.061406000  |
| 1 | -0.675280000 | 5.073494000  | 0.565568000  |
| 1 | -2.747345000 | 6.110355000  | 1.431939000  |
| 1 | -4.592395000 | 4.678200000  | 2.287125000  |
| 1 | -4.357271000 | 2.204737000  | 2.216469000  |
| 1 | -2.289247000 | 1.171178000  | 1.344570000  |
| 6 | -1.362577000 | -1.358138000 | -0.914498000 |
| 6 | -2.671915000 | -2.125939000 | -2.618620000 |
| 6 | -3.880155000 | -2.174276000 | -3.475465000 |
| 1 | -3.855904000 | -3.055827000 | -4.122604000 |
| 1 | -4.792242000 | -2.225881000 | -2.867256000 |
| 1 | -3.971884000 | -1.289481000 | -4.117462000 |
| 6 | -1.571772000 | -2.921485000 | -2.567717000 |
| 6 | -1.157997000 | -4.077803000 | -3.397719000 |
| 1 | -1.902087000 | -4.275049000 | -4.174709000 |
| 1 | -0.197061000 | -3.893628000 | -3.893851000 |
| 1 | -1.039649000 | -4.991675000 | -2.802097000 |
| 6 | 0.398678000  | -3.054292000 | -1.007226000 |
| 6 | 1.396215000  | -4.695859000 | 0.422479000  |
| 6 | 2.772411000  | -3.129142000 | -0.761511000 |
| 1 | 1.294109000  | -5.526663000 | 1.122325000  |
| 1 | 3.758838000  | -2.726251000 | -0.994363000 |
| 6 | -3.490774000 | -0.184330000 | -1.271538000 |
| 6 | -5.312309000 | 0.512439000  | 0.111478000  |
| 6 | -4.554432000 | 1.915340000  | -1.676816000 |
| 1 | -5.989736000 | 0.328332000  | 0.946770000  |
| 1 | -4.625926000 | 2.843390000  | -2.244980000 |
| 6 | 1.655127000  | -2.543646000 | -1.354329000 |
| 6 | 1.806964000  | -1.420470000 | -2.331290000 |
| 1 | 2.845949000  | -1.077522000 | -2.364120000 |
| 1 | 1.531010000  | -1.740054000 | -3.345826000 |
| 1 | 1.170784000  | -0.562290000 | -2.084880000 |
| 6 | 0.246258000  | -4.128605000 | -0.122941000 |
| 6 | -1.114669000 | -4.603561000 | 0.287271000  |
| 1 | -1.633140000 | -3.827192000 | 0.868868000  |
| 1 | -1.755531000 | -4.841394000 | -0.570692000 |
| 1 | -1.042533000 | -5.498296000 | 0.913972000  |
| 6 | 2.665028000  | -4.201174000 | 0.123152000  |
| 6 | 3.894375000  | -4.816545000 | 0.719247000  |
| 1 | 3.679469000  | -5.308092000 | 1.673881000  |
| 1 | 4.324044000  | -5.573281000 | 0.050576000  |
| 1 | 4.669560000  | -4.060241000 | 0.888373000  |
| 6 | -3.578445000 | 0.986418000  | -2.032614000 |
| 6 | -2.671326000 | 1.236317000  | -3.197763000 |
| 1 | -1.656557000 | 0.873641000  | -3.008934000 |
| 1 | -3.039828000 | 0.738856000  | -4.105747000 |
| 1 | -2.612928000 | 2.306628000  | -3.416995000 |
| 6 | -4.343039000 | -0.440597000 | -0.192612000 |
| 6 | -4.200325000 | -1.686593000 | 0.628055000  |
| 1 | -3.309604000 | -1.634728000 | 1.272130000  |
| 1 | -5.072617000 | -1.831866000 | 1.272542000  |
| 1 | -4.081257000 | -2.580490000 | 0.001251000  |



|   |              |              |              |
|---|--------------|--------------|--------------|
| 6 | -5.427975000 | 1.696908000  | -0.613829000 |
| 6 | -6.433807000 | 2.739032000  | -0.232589000 |
| 1 | -7.200678000 | 2.335521000  | 0.437123000  |
| 1 | -5.938826000 | 3.569657000  | 0.289487000  |
| 1 | -6.933750000 | 3.160877000  | -1.111573000 |
| 7 | -0.788994000 | -2.433651000 | -1.519041000 |
| 7 | -2.512621000 | -1.172991000 | -1.606107000 |
| 1 | 1.180435000  | 3.903957000  | 1.363741000  |
| 1 | 2.556440000  | 0.222037000  | 2.928288000  |

Method: M06-2X/6-31G(d,p) Key word: opt freq pop=full  
 imaginary frequencies: 0 Energy: -2438.342279 Hartree

### Int II (1c).

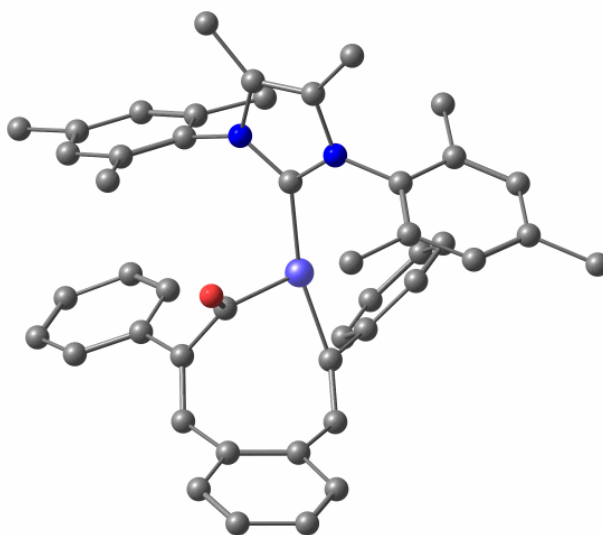

|    |              |              |              |
|----|--------------|--------------|--------------|
| 6  | 0.362666000  | 5.120572000  | -1.794062000 |
| 6  | 1.558085000  | 5.716499000  | -2.162321000 |
| 6  | 2.720146000  | 5.404451000  | -1.460946000 |
| 6  | 2.661492000  | 4.507869000  | -0.406978000 |
| 6  | 1.469341000  | 3.867460000  | -0.035969000 |
| 6  | 0.294191000  | 4.184450000  | -0.755356000 |
| 6  | 1.523659000  | 2.998660000  | 1.153888000  |
| 6  | 1.035970000  | 1.764925000  | 1.318210000  |
| 28 | 0.406602000  | 0.257157000  | 0.398945000  |
| 6  | -0.412271000 | 1.350100000  | -0.839534000 |
| 6  | -1.388942000 | 2.370910000  | -0.320882000 |
| 6  | -1.027247000 | 3.662466000  | -0.368811000 |
| 8  | -0.168291000 | 1.297071000  | -2.027452000 |
| 6  | -2.688419000 | 1.960813000  | 0.243853000  |
| 6  | 1.063951000  | 0.906251000  | 2.491536000  |
| 6  | 0.092185000  | 1.015781000  | 3.514381000  |
| 6  | 0.004507000  | 0.063283000  | 4.512156000  |
| 6  | 0.868008000  | -1.038730000 | 4.524733000  |
| 6  | 1.822428000  | -1.170011000 | 3.528324000  |
| 6  | 1.919599000  | -0.216340000 | 2.511793000  |
| 6  | -3.852063000 | 2.657481000  | -0.104517000 |
| 6  | -5.065293000 | 2.371433000  | 0.508877000  |

|   |              |              |              |
|---|--------------|--------------|--------------|
| 6 | -5.137701000 | 1.383519000  | 1.485867000  |
| 6 | -3.995510000 | 0.658981000  | 1.812319000  |
| 6 | -2.784319000 | 0.931230000  | 1.188265000  |
| 1 | -0.587265000 | 1.866640000  | 3.491630000  |
| 1 | -0.741329000 | 0.174087000  | 5.296773000  |
| 1 | 0.793646000  | -1.780674000 | 5.316181000  |
| 1 | 2.516387000  | -2.009451000 | 3.541163000  |
| 1 | 2.701134000  | -0.297492000 | 1.757029000  |
| 1 | -3.790994000 | 3.433549000  | -0.865228000 |
| 1 | -5.955584000 | 2.931096000  | 0.229654000  |
| 1 | -6.081735000 | 1.171454000  | 1.984153000  |
| 1 | -4.044468000 | -0.126663000 | 2.564089000  |
| 1 | -1.895189000 | 0.352853000  | 1.448195000  |
| 6 | 0.278307000  | -1.388222000 | -0.590597000 |
| 6 | -0.296619000 | -3.078647000 | -2.017356000 |
| 6 | -1.226472000 | -3.980850000 | -2.736316000 |
| 1 | -0.667129000 | -4.731522000 | -3.302007000 |
| 1 | -1.889360000 | -4.507856000 | -2.038267000 |
| 1 | -1.868014000 | -3.437694000 | -3.440914000 |
| 6 | 1.058517000  | -3.025780000 | -1.985570000 |
| 6 | 2.089791000  | -3.811546000 | -2.704505000 |
| 1 | 1.618297000  | -4.533781000 | -3.377037000 |
| 1 | 2.737811000  | -3.163963000 | -3.308276000 |
| 1 | 2.742308000  | -4.365923000 | -2.017990000 |
| 6 | 2.721746000  | -1.710410000 | -0.665747000 |
| 6 | 4.552226000  | -2.253468000 | 0.781312000  |
| 6 | 4.730561000  | -0.423206000 | -0.756081000 |
| 1 | 4.984254000  | -2.873713000 | 1.567976000  |
| 1 | 5.306218000  | 0.396272000  | -1.187218000 |
| 6 | -2.130104000 | -1.895983000 | -0.826692000 |
| 6 | -3.944612000 | -2.435414000 | 0.638862000  |
| 6 | -4.338451000 | -1.139531000 | -1.334873000 |
| 1 | -4.316657000 | -2.906071000 | 1.550062000  |
| 1 | -5.018046000 | -0.580868000 | -1.980612000 |
| 6 | 3.439885000  | -0.655524000 | -1.235194000 |
| 6 | 2.851058000  | 0.221228000  | -2.293197000 |
| 1 | 3.637116000  | 0.758109000  | -2.832893000 |
| 1 | 2.250075000  | -0.344184000 | -3.014464000 |
| 1 | 2.166829000  | 0.960718000  | -1.857177000 |
| 6 | 3.258234000  | -2.520538000 | 0.344545000  |
| 6 | 2.438153000  | -3.603768000 | 0.976312000  |
| 1 | 1.578454000  | -3.171196000 | 1.508323000  |
| 1 | 2.032724000  | -4.309553000 | 0.240194000  |
| 1 | 3.031949000  | -4.171846000 | 1.699672000  |
| 6 | 5.300670000  | -1.203761000 | 0.245722000  |
| 6 | 6.679528000  | -0.912028000 | 0.756198000  |
| 1 | 7.219045000  | -1.831866000 | 1.007306000  |
| 1 | 7.271228000  | -0.359880000 | 0.018912000  |
| 1 | 6.641951000  | -0.301426000 | 1.667020000  |
| 6 | -2.989338000 | -1.204156000 | -1.684971000 |
| 6 | -2.518496000 | -0.532116000 | -2.939153000 |
| 1 | -2.659202000 | 0.553249000  | -2.867954000 |
| 1 | -1.454860000 | -0.692106000 | -3.132853000 |
| 1 | -3.096754000 | -0.879802000 | -3.804165000 |
| 6 | -2.587792000 | -2.512667000 | 0.346329000  |
| 6 | -1.637523000 | -3.202312000 | 1.277805000  |
| 1 | -1.020236000 | -2.469245000 | 1.819269000  |
| 1 | -2.179954000 | -3.798205000 | 2.018224000  |
| 1 | -0.943385000 | -3.865109000 | 0.743485000  |
| 6 | -4.834353000 | -1.748683000 | -0.187680000 |

|   |              |              |              |
|---|--------------|--------------|--------------|
| 6 | -6.289415000 | -1.652873000 | 0.156399000  |
| 1 | -6.473989000 | -1.939576000 | 1.197799000  |
| 1 | -6.652942000 | -0.627079000 | 0.020926000  |
| 1 | -6.899958000 | -2.304753000 | -0.480931000 |
| 7 | 1.386457000  | -1.991597000 | -1.103398000 |
| 7 | -0.748854000 | -2.063659000 | -1.164396000 |
| 1 | 3.562925000  | 4.278649000  | 0.160993000  |
| 1 | 3.666576000  | 5.868791000  | -1.729327000 |
| 1 | 1.583604000  | 6.426217000  | -2.985942000 |
| 1 | -0.555520000 | 5.369752000  | -2.324410000 |
| 1 | 2.100055000  | 3.434648000  | 1.980690000  |
| 1 | -1.751531000 | 4.404445000  | -0.020614000 |

Method: M06-2X/6-31G(d,p) Key word: opt freq pop=full  
 imaginary frequencies: 0 Energy: -2131.365845 Hartree

### Int I'.

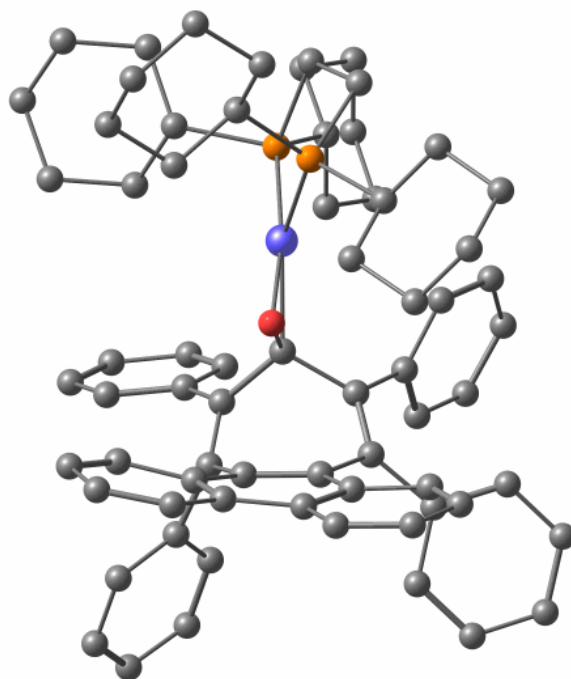

|   |             |              |              |
|---|-------------|--------------|--------------|
| 6 | 3.274007000 | 0.692740000  | 2.265258000  |
| 6 | 4.241632000 | 1.673842000  | 1.945966000  |
| 6 | 4.704307000 | 1.776933000  | 0.577529000  |
| 6 | 4.106728000 | 0.961838000  | -0.421532000 |
| 6 | 3.170136000 | -0.086708000 | -0.052047000 |
| 6 | 2.840465000 | -0.260994000 | 1.273816000  |
| 6 | 5.672871000 | 2.726370000  | 0.195477000  |
| 6 | 6.017151000 | 2.920217000  | -1.123201000 |
| 6 | 5.379380000 | 2.169835000  | -2.117236000 |
| 6 | 4.447661000 | 1.218032000  | -1.768641000 |
| 6 | 2.669257000 | 0.727048000  | 3.541081000  |
| 6 | 3.067796000 | 1.627837000  | 4.502834000  |
| 6 | 4.091057000 | 2.540226000  | 4.214190000  |
| 6 | 4.650411000 | 2.568159000  | 2.955806000  |

|    |              |              |              |
|----|--------------|--------------|--------------|
| 6  | 2.524507000  | -0.906871000 | -1.109996000 |
| 6  | 1.173794000  | -1.078422000 | -1.100459000 |
| 28 | -1.250198000 | 0.529011000  | -0.203794000 |
| 6  | 0.383571000  | -0.538383000 | 0.086690000  |
| 6  | 0.700665000  | -1.478168000 | 1.239254000  |
| 6  | 1.967429000  | -1.380188000 | 1.715513000  |
| 8  | 0.462116000  | 0.755604000  | 0.316145000  |
| 15 | -3.385546000 | 0.033004000  | -0.530528000 |
| 15 | -1.687838000 | 2.635069000  | -0.777712000 |
| 6  | -4.167060000 | 1.570982000  | -1.285223000 |
| 6  | -3.118388000 | 2.464772000  | -1.943327000 |
| 6  | -0.238678000 | -2.508846000 | 1.719178000  |
| 6  | 2.641633000  | -2.505739000 | 2.433654000  |
| 6  | 0.467277000  | -1.867357000 | -2.133948000 |
| 6  | 0.715435000  | -3.228723000 | -2.331927000 |
| 6  | 0.075105000  | -3.928137000 | -3.348924000 |
| 6  | -0.810768000 | -3.272056000 | -4.197897000 |
| 6  | -1.077937000 | -1.919351000 | -4.002331000 |
| 6  | -0.459474000 | -1.228625000 | -2.966798000 |
| 6  | -0.440780000 | -2.682220000 | 3.094795000  |
| 6  | -1.307070000 | -3.657449000 | 3.573020000  |
| 6  | -1.992024000 | -4.482421000 | 2.685232000  |
| 6  | -1.805204000 | -4.315956000 | 1.316579000  |
| 6  | -0.946690000 | -3.333215000 | 0.838899000  |
| 6  | 2.619799000  | -3.753325000 | 1.789642000  |
| 6  | 3.265371000  | -4.857637000 | 2.327294000  |
| 6  | 3.963216000  | -4.742144000 | 3.524535000  |
| 6  | 4.015001000  | -3.509615000 | 4.164240000  |
| 6  | 3.369915000  | -2.402131000 | 3.623900000  |
| 6  | 3.412697000  | -1.600154000 | -2.081046000 |
| 6  | 3.194524000  | -1.615184000 | -3.464347000 |
| 6  | 4.047553000  | -2.311770000 | -4.309813000 |
| 6  | 5.135531000  | -3.009450000 | -3.792798000 |
| 6  | 5.368102000  | -2.996200000 | -2.421963000 |
| 6  | 4.518511000  | -2.293510000 | -1.576103000 |
| 1  | 6.162260000  | 3.327940000  | 0.956362000  |
| 1  | 6.769291000  | 3.659931000  | -1.387015000 |
| 1  | 5.616735000  | 2.333127000  | -3.165928000 |
| 1  | 3.967386000  | 0.648635000  | -2.556434000 |
| 1  | 1.848397000  | 0.041555000  | 3.741279000  |
| 1  | 2.580692000  | 1.639286000  | 5.475034000  |
| 1  | 4.421197000  | 3.249552000  | 4.969489000  |
| 1  | 5.401700000  | 3.321931000  | 2.737860000  |
| 1  | -4.664119000 | 2.126968000  | -0.478843000 |
| 1  | -4.955362000 | 1.291026000  | -1.996296000 |
| 1  | -3.548335000 | 3.423725000  | -2.264153000 |
| 1  | -2.709098000 | 1.974323000  | -2.841092000 |
| 1  | 1.438706000  | -3.731856000 | -1.690245000 |
| 1  | 0.281956000  | -4.986639000 | -3.489010000 |
| 1  | -1.299641000 | -3.814331000 | -5.004461000 |
| 1  | -1.777766000 | -1.401931000 | -4.656820000 |
| 1  | -0.677204000 | -0.173170000 | -2.793300000 |
| 1  | 0.098452000  | -2.041006000 | 3.790195000  |
| 1  | -1.447480000 | -3.773874000 | 4.645649000  |
| 1  | -2.666967000 | -5.249158000 | 3.058815000  |
| 1  | -2.331437000 | -4.955927000 | 0.609240000  |
| 1  | -0.808043000 | -3.212918000 | -0.233197000 |
| 1  | 2.089694000  | -3.840186000 | 0.841593000  |
| 1  | 3.227828000  | -5.810349000 | 1.803740000  |
| 1  | 4.470360000  | -5.604424000 | 3.951285000  |

|   |              |              |              |
|---|--------------|--------------|--------------|
| 1 | 4.564765000  | -3.402823000 | 5.096910000  |
| 1 | 3.436465000  | -1.450242000 | 4.142900000  |
| 1 | 2.348616000  | -1.068680000 | -3.878807000 |
| 1 | 3.862955000  | -2.306164000 | -5.381825000 |
| 1 | 5.801326000  | -3.555871000 | -4.456762000 |
| 1 | 6.216997000  | -3.534412000 | -2.006207000 |
| 1 | 4.699295000  | -2.280776000 | -0.501364000 |
| 6 | -4.144826000 | 0.015459000  | 1.179950000  |
| 6 | -5.635152000 | 0.307517000  | 1.373102000  |
| 6 | -3.750182000 | -1.241449000 | 1.955513000  |
| 1 | -3.587436000 | 0.859649000  | 1.633573000  |
| 6 | -5.945750000 | 0.483929000  | 2.858548000  |
| 1 | -6.234884000 | -0.528839000 | 0.986328000  |
| 1 | -5.951766000 | 1.199289000  | 0.815637000  |
| 6 | -4.076437000 | -1.095990000 | 3.437310000  |
| 1 | -4.296847000 | -2.109746000 | 1.548392000  |
| 1 | -2.682237000 | -1.452260000 | 1.818163000  |
| 6 | -5.544827000 | -0.752221000 | 3.655779000  |
| 1 | -7.012710000 | 0.703026000  | 2.996595000  |
| 1 | -5.394723000 | 1.359116000  | 3.240419000  |
| 1 | -3.806633000 | -2.018312000 | 3.968481000  |
| 1 | -3.445184000 | -0.297525000 | 3.860754000  |
| 1 | -5.754676000 | -0.605668000 | 4.723144000  |
| 1 | -6.165367000 | -1.602904000 | 3.329627000  |
| 6 | -4.149011000 | -1.298002000 | -1.601435000 |
| 6 | -3.416219000 | -2.631853000 | -1.473419000 |
| 6 | -5.658146000 | -1.508009000 | -1.472596000 |
| 1 | -3.943894000 | -0.905484000 | -2.618303000 |
| 6 | -3.931054000 | -3.647933000 | -2.485972000 |
| 1 | -3.555654000 | -3.026267000 | -0.453783000 |
| 1 | -2.338276000 | -2.472250000 | -1.602595000 |
| 6 | -6.164820000 | -2.507337000 | -2.508888000 |
| 1 | -5.870260000 | -1.911592000 | -0.470074000 |
| 1 | -6.206968000 | -0.558535000 | -1.549434000 |
| 6 | -5.438029000 | -3.840532000 | -2.376054000 |
| 1 | -3.401305000 | -4.602494000 | -2.359631000 |
| 1 | -3.684174000 | -3.293229000 | -3.500409000 |
| 1 | -7.248915000 | -2.643665000 | -2.402382000 |
| 1 | -5.998010000 | -2.099037000 | -3.518981000 |
| 1 | -5.794774000 | -4.551234000 | -3.132598000 |
| 1 | -5.677194000 | -4.281978000 | -1.394800000 |
| 6 | -0.294449000 | 3.267463000  | -1.829935000 |
| 6 | -0.616269000 | 4.353626000  | -2.858677000 |
| 6 | 0.939175000  | 3.635212000  | -0.997411000 |
| 1 | -0.030211000 | 2.345112000  | -2.385563000 |
| 6 | 0.589657000  | 4.615209000  | -3.757973000 |
| 1 | -0.884462000 | 5.286713000  | -2.340523000 |
| 1 | -1.486877000 | 4.072585000  | -3.467749000 |
| 6 | 2.131876000  | 3.902543000  | -1.908072000 |
| 1 | 0.721093000  | 4.541482000  | -0.406983000 |
| 1 | 1.173707000  | 2.825139000  | -0.293701000 |
| 6 | 1.822144000  | 4.980529000  | -2.938968000 |
| 1 | 0.354311000  | 5.406380000  | -4.482040000 |
| 1 | 0.802870000  | 3.707238000  | -4.345125000 |
| 1 | 3.015238000  | 4.168092000  | -1.311953000 |
| 1 | 2.393445000  | 2.963858000  | -2.424241000 |
| 1 | 2.684761000  | 5.144514000  | -3.597685000 |
| 1 | 1.638359000  | 5.936944000  | -2.421474000 |
| 6 | -2.232955000 | 3.908068000  | 0.464434000  |
| 6 | -1.425017000 | 3.757790000  | 1.759067000  |

|   |              |             |              |
|---|--------------|-------------|--------------|
| 6 | -2.289445000 | 5.368777000 | 0.018181000  |
| 1 | -3.268672000 | 3.585750000 | 0.693059000  |
| 6 | -1.984037000 | 4.653127000 | 2.858574000  |
| 1 | -0.373079000 | 4.023520000 | 1.567092000  |
| 1 | -1.413247000 | 2.704508000 | 2.071378000  |
| 6 | -2.851350000 | 6.255418000 | 1.126828000  |
| 1 | -1.270497000 | 5.708402000 | -0.228072000 |
| 1 | -2.887306000 | 5.476379000 | -0.897949000 |
| 6 | -2.044615000 | 6.109184000 | 2.411861000  |
| 1 | -1.381530000 | 4.553281000 | 3.770113000  |
| 1 | -3.000872000 | 4.312543000 | 3.116828000  |
| 1 | -2.871708000 | 7.302844000 | 0.799134000  |
| 1 | -3.897762000 | 5.968859000 | 1.321465000  |
| 1 | -2.468301000 | 6.739435000 | 3.204129000  |
| 1 | -1.019718000 | 6.474426000 | 2.236376000  |

Method: M06-2X/6-31G(d,p) Key word: opt freq pop=full  
 imaginary frequencies: 0 Energy: -3599.238937 Hartree

### TS I'

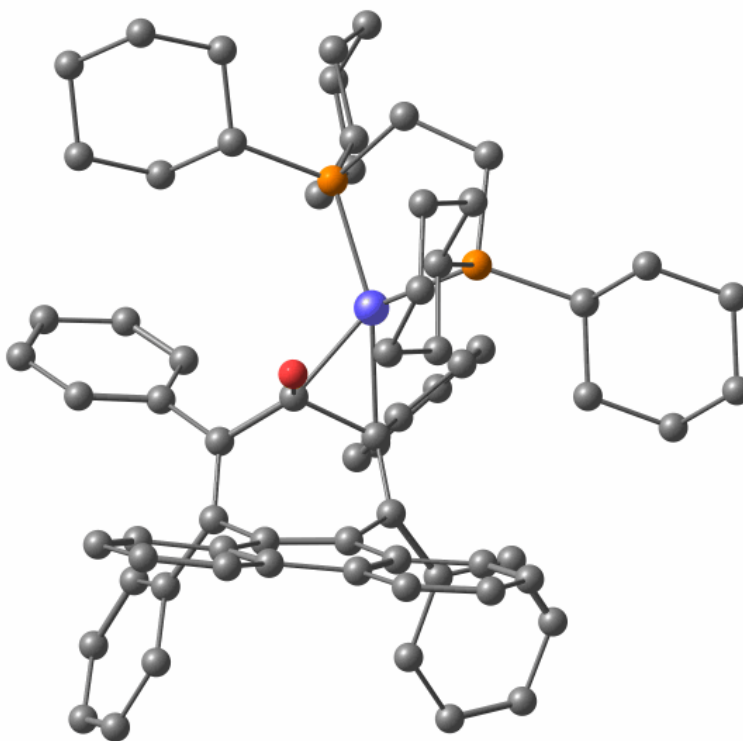

|   |              |              |              |
|---|--------------|--------------|--------------|
| 6 | -3.235723000 | -1.525224000 | -2.075811000 |
| 6 | -4.027749000 | -0.448339000 | -2.550938000 |
| 6 | -4.308480000 | 0.670900000  | -1.675916000 |
| 6 | -3.709863000 | 0.708691000  | -0.392701000 |
| 6 | -2.835727000 | -0.362186000 | 0.029043000  |
| 6 | -2.671050000 | -1.484085000 | -0.743319000 |
| 6 | -5.128248000 | 1.749338000  | -2.067572000 |
| 6 | -5.337402000 | 2.833964000  | -1.245429000 |
| 6 | -4.737134000 | 2.875338000  | 0.019861000  |

|    |              |              |              |
|----|--------------|--------------|--------------|
| 6  | -3.943611000 | 1.829624000  | 0.433374000  |
| 6  | -2.950339000 | -2.592110000 | -2.956602000 |
| 6  | -3.426928000 | -2.610652000 | -4.246873000 |
| 6  | -4.209330000 | -1.547067000 | -4.714244000 |
| 6  | -4.495172000 | -0.490562000 | -3.879871000 |
| 6  | -2.013781000 | -0.186630000 | 1.254357000  |
| 6  | -0.647198000 | -0.183341000 | 1.139388000  |
| 28 | 1.070688000  | 0.645439000  | 0.166572000  |
| 6  | -0.158756000 | -0.792445000 | -0.289484000 |
| 6  | -0.408823000 | -2.292130000 | -0.292123000 |
| 6  | -1.736951000 | -2.594662000 | -0.344069000 |
| 8  | -0.326287000 | -0.147039000 | -1.349710000 |
| 15 | 3.193575000  | 0.630851000  | -0.447362000 |
| 15 | 0.942949000  | 2.851461000  | -0.081300000 |
| 6  | 3.539678000  | 2.411974000  | -0.936685000 |
| 6  | 2.711637000  | 3.410663000  | -0.134849000 |
| 6  | 0.706528000  | -3.253933000 | -0.307125000 |
| 6  | -2.348486000 | -3.892309000 | 0.038582000  |
| 6  | 0.177776000  | -0.403544000 | 2.376844000  |
| 6  | 0.113526000  | -1.649558000 | 3.015454000  |
| 6  | 0.843052000  | -1.906925000 | 4.171297000  |
| 6  | 1.646060000  | -0.917357000 | 4.727551000  |
| 6  | 1.698026000  | 0.336558000  | 4.125348000  |
| 6  | 0.969782000  | 0.592086000  | 2.968507000  |
| 6  | 0.777761000  | -4.177737000 | -1.360639000 |
| 6  | 1.815719000  | -5.095613000 | -1.434720000 |
| 6  | 2.808024000  | -5.111896000 | -0.457270000 |
| 6  | 2.759546000  | -4.188725000 | 0.581279000  |
| 6  | 1.728877000  | -3.257284000 | 0.648251000  |
| 6  | -1.643840000 | -4.867124000 | 0.767429000  |
| 6  | -2.254944000 | -6.040286000 | 1.183486000  |
| 6  | -3.595528000 | -6.281223000 | 0.899727000  |
| 6  | -4.319811000 | -5.318508000 | 0.208614000  |
| 6  | -3.709114000 | -4.142369000 | -0.207647000 |
| 6  | -2.737158000 | -0.217691000 | 2.545612000  |
| 6  | -2.378231000 | 0.567153000  | 3.651880000  |
| 6  | -3.093515000 | 0.495158000  | 4.839326000  |
| 6  | -4.181410000 | -0.364876000 | 4.954506000  |
| 6  | -4.552500000 | -1.147255000 | 3.866173000  |
| 6  | -3.845622000 | -1.068037000 | 2.674004000  |
| 1  | -5.612405000 | 1.734032000  | -3.040115000 |
| 1  | -5.971775000 | 3.652134000  | -1.578027000 |
| 1  | -4.898458000 | 3.727578000  | 0.677539000  |
| 1  | -3.487822000 | 1.861751000  | 1.419001000  |
| 1  | -2.336776000 | -3.415370000 | -2.601507000 |
| 1  | -3.186292000 | -3.444088000 | -4.902328000 |
| 1  | -4.581749000 | -1.548117000 | -5.735826000 |
| 1  | -5.084585000 | 0.334751000  | -4.269085000 |
| 1  | 3.279034000  | 2.490889000  | -2.002696000 |
| 1  | 4.611920000  | 2.638600000  | -0.859937000 |
| 1  | 2.836641000  | 4.430003000  | -0.525891000 |
| 1  | 3.042650000  | 3.426984000  | 0.915580000  |
| 1  | -0.537890000 | -2.417249000 | 2.596786000  |
| 1  | 0.770172000  | -2.883526000 | 4.644692000  |
| 1  | 2.216793000  | -1.116104000 | 5.631836000  |
| 1  | 2.303196000  | 1.128187000  | 4.563360000  |
| 1  | 1.000586000  | 1.582878000  | 2.518061000  |
| 1  | 0.003326000  | -4.162080000 | -2.124785000 |
| 1  | 1.852170000  | -5.801843000 | -2.261229000 |
| 1  | 3.617682000  | -5.835959000 | -0.511493000 |

|   |              |              |              |
|---|--------------|--------------|--------------|
| 1 | 3.533524000  | -4.183544000 | 1.347092000  |
| 1 | 1.702892000  | -2.533601000 | 1.457360000  |
| 1 | -0.601785000 | -4.704245000 | 1.025680000  |
| 1 | -1.676310000 | -6.769952000 | 1.745486000  |
| 1 | -4.071774000 | -7.202471000 | 1.226593000  |
| 1 | -5.373715000 | -5.477135000 | -0.008636000 |
| 1 | -4.304170000 | -3.401852000 | -0.734494000 |
| 1 | -1.534603000 | 1.249681000  | 3.576878000  |
| 1 | -2.799717000 | 1.119240000  | 5.680323000  |
| 1 | -4.739535000 | -0.420760000 | 5.886185000  |
| 1 | -5.400522000 | -1.823840000 | 3.943502000  |
| 1 | -4.139831000 | -1.683271000 | 1.824647000  |
| 6 | 3.711259000  | -0.234035000 | -2.025530000 |
| 6 | 4.966160000  | 0.249087000  | -2.758166000 |
| 6 | 3.737520000  | -1.751709000 | -1.859184000 |
| 1 | 2.838496000  | 0.003283000  | -2.667209000 |
| 6 | 5.104427000  | -0.449397000 | -4.109311000 |
| 1 | 5.857497000  | 0.023076000  | -2.154841000 |
| 1 | 4.952605000  | 1.337295000  | -2.900241000 |
| 6 | 3.909110000  | -2.458904000 | -3.199097000 |
| 1 | 4.570808000  | -2.032204000 | -1.190985000 |
| 1 | 2.815816000  | -2.091248000 | -1.371477000 |
| 6 | 5.142597000  | -1.963255000 | -3.942682000 |
| 1 | 6.004840000  | -0.092799000 | -4.626752000 |
| 1 | 4.247887000  | -0.175522000 | -4.746407000 |
| 1 | 3.956795000  | -3.544667000 | -3.041886000 |
| 1 | 3.012225000  | -2.272958000 | -3.812202000 |
| 1 | 5.232195000  | -2.457044000 | -4.919027000 |
| 1 | 6.043815000  | -2.237392000 | -3.369644000 |
| 6 | 4.469498000  | 0.387506000  | 0.901353000  |
| 6 | 4.200063000  | -0.873191000 | 1.724321000  |
| 6 | 5.951602000  | 0.466285000  | 0.534543000  |
| 1 | 4.238435000  | 1.250840000  | 1.559029000  |
| 6 | 5.072934000  | -0.913889000 | 2.973078000  |
| 1 | 4.404078000  | -1.761140000 | 1.101969000  |
| 1 | 3.137694000  | -0.914642000 | 2.000353000  |
| 6 | 6.819809000  | 0.454199000  | 1.790170000  |
| 1 | 6.215696000  | -0.408265000 | -0.082186000 |
| 1 | 6.170011000  | 1.355885000  | -0.072698000 |
| 6 | 6.552841000  | -0.790508000 | 2.629349000  |
| 1 | 4.880913000  | -1.837004000 | 3.537067000  |
| 1 | 4.778738000  | -0.081340000 | 3.634202000  |
| 1 | 7.881727000  | 0.515231000  | 1.518174000  |
| 1 | 6.598172000  | 1.352478000  | 2.389112000  |
| 1 | 7.163466000  | -0.778932000 | 3.541464000  |
| 1 | 6.864424000  | -1.679525000 | 2.056878000  |
| 6 | 0.174886000  | 4.082431000  | 1.087947000  |
| 6 | 0.166280000  | 5.560374000  | 0.698643000  |
| 6 | -1.225727000 | 3.641296000  | 1.514566000  |
| 1 | 0.832693000  | 3.979320000  | 1.975002000  |
| 6 | -0.347981000 | 6.415004000  | 1.856698000  |
| 1 | -0.496567000 | 5.698057000  | -0.170970000 |
| 1 | 1.166145000  | 5.894520000  | 0.387908000  |
| 6 | -1.732632000 | 4.478412000  | 2.680983000  |
| 1 | -1.919222000 | 3.751996000  | 0.666052000  |
| 1 | -1.227121000 | 2.570388000  | 1.757065000  |
| 6 | -1.728495000 | 5.960205000  | 2.320574000  |
| 1 | -0.370063000 | 7.473403000  | 1.566043000  |
| 1 | 0.359462000  | 6.338380000  | 2.698407000  |
| 1 | -2.740652000 | 4.152442000  | 2.974767000  |



|   |              |             |              |
|---|--------------|-------------|--------------|
| 1 | -1.083778000 | 4.309044000 | 3.557302000  |
| 1 | -2.065358000 | 6.568756000 | 3.169579000  |
| 1 | -2.454259000 | 6.127903000 | 1.507703000  |
| 6 | 0.309749000  | 3.105866000 | -1.814652000 |
| 6 | -1.205562000 | 2.893918000 | -1.883691000 |
| 6 | 0.717621000  | 4.359918000 | -2.585532000 |
| 1 | 0.758787000  | 2.232978000 | -2.324769000 |
| 6 | -1.664506000 | 2.781908000 | -3.332166000 |
| 1 | -1.722718000 | 3.745840000 | -1.409471000 |
| 1 | -1.481385000 | 1.987125000 | -1.330381000 |
| 6 | 0.259793000  | 4.250826000 | -4.039667000 |
| 1 | 0.256012000  | 5.247030000 | -2.124710000 |
| 1 | 1.804744000  | 4.518973000 | -2.547494000 |
| 6 | -1.242489000 | 4.005736000 | -4.137581000 |
| 1 | -2.755286000 | 2.651036000 | -3.367257000 |
| 1 | -1.227298000 | 1.868343000 | -3.767570000 |
| 1 | 0.540664000  | 5.155662000 | -4.594964000 |
| 1 | 0.793755000  | 3.412557000 | -4.516262000 |
| 1 | -1.543265000 | 3.903442000 | -5.188457000 |
| 1 | -1.773273000 | 4.889991000 | -3.746963000 |

Method: M06-2X/6-31G(d,p) Key word: opt freq pop=full  
 imaginary frequencies:  $-94.807 \text{ cm}^{-1}$  Energy:  $-3599.215012 \text{ Hartree}$

### Int II'

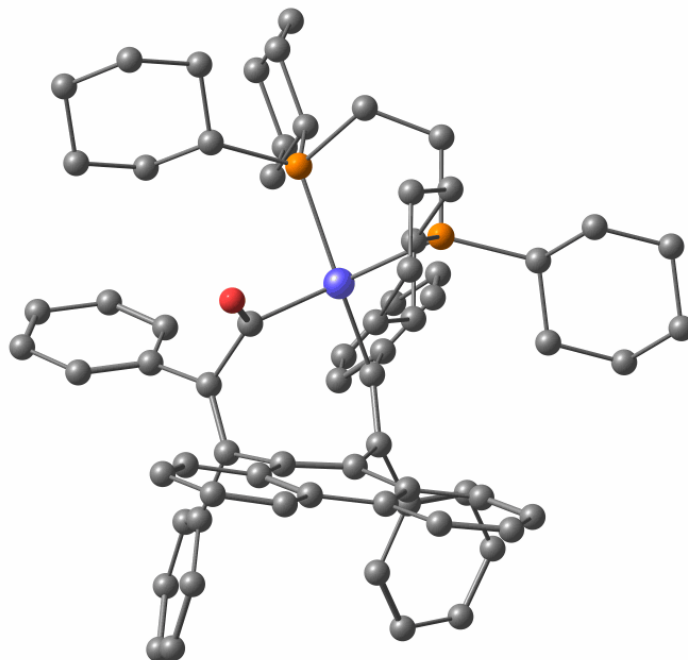

|   |              |              |             |
|---|--------------|--------------|-------------|
| 6 | -2.534360000 | 1.350113000  | 2.500100000 |
| 6 | -3.588241000 | 0.456597000  | 2.816983000 |
| 6 | -4.176852000 | -0.341627000 | 1.759907000 |
| 6 | -3.651582000 | -0.248235000 | 0.444088000 |
| 6 | -2.540151000 | 0.634174000  | 0.158321000 |
| 6 | -2.059579000 | 1.460569000  | 1.141465000 |
| 6 | -5.231366000 | -1.245627000 | 2.001079000 |

|    |              |              |              |
|----|--------------|--------------|--------------|
| 6  | -5.757744000 | -2.028250000 | 0.997288000  |
| 6  | -5.254167000 | -1.920593000 | -0.305393000 |
| 6  | -4.226007000 | -1.044598000 | -0.570062000 |
| 6  | -1.940061000 | 2.103595000  | 3.535874000  |
| 6  | -2.363757000 | 1.987451000  | 4.839425000  |
| 6  | -3.410409000 | 1.110460000  | 5.153689000  |
| 6  | -4.005444000 | 0.364777000  | 4.160473000  |
| 6  | -1.899600000 | 0.626883000  | -1.190264000 |
| 6  | -0.629797000 | 0.173168000  | -1.330339000 |
| 28 | 0.769096000  | -0.577460000 | -0.229066000 |
| 6  | 0.637033000  | 0.817886000  | 1.033163000  |
| 6  | 0.242948000  | 2.247667000  | 0.785050000  |
| 6  | -1.071259000 | 2.534245000  | 0.800064000  |
| 8  | 0.741489000  | 0.393548000  | 2.173346000  |
| 15 | 2.918566000  | -1.166943000 | 0.298476000  |
| 15 | 0.353088000  | -2.828090000 | -0.304987000 |
| 6  | 2.973111000  | -3.015583000 | 0.538818000  |
| 6  | 1.988126000  | -3.700475000 | -0.398728000 |
| 6  | 1.366555000  | 3.190651000  | 0.616026000  |
| 6  | -1.656112000 | 3.837578000  | 0.404543000  |
| 6  | 0.145041000  | 0.346475000  | -2.571987000 |
| 6  | 0.401590000  | 1.644783000  | -3.054720000 |
| 6  | 1.200028000  | 1.858382000  | -4.169240000 |
| 6  | 1.765836000  | 0.781533000  | -4.849004000 |
| 6  | 1.513291000  | -0.510830000 | -4.400388000 |
| 6  | 0.720125000  | -0.726462000 | -3.278184000 |
| 6  | 1.639967000  | 4.119332000  | 1.626271000  |
| 6  | 2.749995000  | 4.950979000  | 1.540363000  |
| 6  | 3.606837000  | 4.865756000  | 0.446119000  |
| 6  | 3.338793000  | 3.950633000  | -0.566822000 |
| 6  | 2.229771000  | 3.116346000  | -0.482170000 |
| 6  | -1.093833000 | 4.600317000  | -0.628758000 |
| 6  | -1.707994000 | 5.760385000  | -1.079031000 |
| 6  | -2.899334000 | 6.193931000  | -0.506021000 |
| 6  | -3.466708000 | 5.453968000  | 0.525614000  |
| 6  | -2.856787000 | 4.288095000  | 0.971602000  |
| 6  | -2.721671000 | 1.162914000  | -2.311086000 |
| 6  | -2.708372000 | 0.595930000  | -3.594307000 |
| 6  | -3.486701000 | 1.119104000  | -4.618620000 |
| 6  | -4.303525000 | 2.222385000  | -4.390221000 |
| 6  | -4.339159000 | 2.788973000  | -3.120724000 |
| 6  | -3.567846000 | 2.259268000  | -2.093963000 |
| 1  | -5.644752000 | -1.336712000 | 3.002089000  |
| 1  | -6.568414000 | -2.719098000 | 1.216910000  |
| 1  | -5.671262000 | -2.525310000 | -1.108732000 |
| 1  | -3.844857000 | -0.957811000 | -1.583476000 |
| 1  | -1.117584000 | 2.769536000  | 3.285360000  |
| 1  | -1.883317000 | 2.569144000  | 5.622386000  |
| 1  | -3.752326000 | 1.013207000  | 6.181427000  |
| 1  | -4.808417000 | -0.315342000 | 4.431877000  |
| 1  | 2.699909000  | -3.215084000 | 1.584674000  |
| 1  | 3.992989000  | -3.397977000 | 0.401640000  |
| 1  | 1.909586000  | -4.773652000 | -0.179213000 |
| 1  | 2.320974000  | -3.612361000 | -1.444418000 |
| 1  | -0.060932000 | 2.488347000  | -2.542348000 |
| 1  | 1.374062000  | 2.874701000  | -4.517278000 |
| 1  | 2.392239000  | 0.948712000  | -5.722318000 |
| 1  | 1.934858000  | -1.363023000 | -4.931218000 |
| 1  | 0.515626000  | -1.745785000 | -2.955142000 |
| 1  | 0.970516000  | 4.176712000  | 2.483146000  |

|   |              |              |              |
|---|--------------|--------------|--------------|
| 1 | 2.948590000  | 5.668061000  | 2.333729000  |
| 1 | 4.476692000  | 5.515262000  | 0.382070000  |
| 1 | 3.996163000  | 3.882121000  | -1.432558000 |
| 1 | 2.019708000  | 2.400684000  | -1.274241000 |
| 1 | -0.171745000 | 4.264547000  | -1.097447000 |
| 1 | -1.257817000 | 6.322016000  | -1.894385000 |
| 1 | -3.383494000 | 7.099467000  | -0.864031000 |
| 1 | -4.397528000 | 5.780554000  | 0.984062000  |
| 1 | -3.325511000 | 3.711623000  | 1.765903000  |
| 1 | -2.077723000 | -0.269982000 | -3.790661000 |
| 1 | -3.457791000 | 0.656384000  | -5.603050000 |
| 1 | -4.910714000 | 2.632303000  | -5.194142000 |
| 1 | -4.968295000 | 3.654164000  | -2.920677000 |
| 1 | -3.607852000 | 2.715975000  | -1.106116000 |
| 6 | 3.679345000  | -0.520818000 | 1.868238000  |
| 6 | 4.788979000  | -1.337749000 | 2.534947000  |
| 6 | 4.092143000  | 0.948496000  | 1.753814000  |
| 1 | 2.795412000  | -0.548241000 | 2.531801000  |
| 6 | 5.105904000  | -0.758701000 | 3.913476000  |
| 1 | 5.700365000  | -1.317049000 | 1.918105000  |
| 1 | 4.503524000  | -2.392815000 | 2.636299000  |
| 6 | 4.407477000  | 1.526040000  | 3.127967000  |
| 1 | 4.985466000  | 1.036090000  | 1.110720000  |
| 1 | 3.303246000  | 1.537847000  | 1.272499000  |
| 6 | 5.490171000  | 0.713875000  | 3.828112000  |
| 1 | 5.906605000  | -1.339710000 | 4.389650000  |
| 1 | 4.217416000  | -0.863421000 | 4.556301000  |
| 1 | 4.709518000  | 2.576815000  | 3.030777000  |
| 1 | 3.483388000  | 1.519044000  | 3.728837000  |
| 1 | 5.691406000  | 1.115744000  | 4.829390000  |
| 1 | 6.430511000  | 0.805214000  | 3.259667000  |
| 6 | 4.089649000  | -0.974597000 | -1.144029000 |
| 6 | 3.960536000  | 0.394779000  | -1.811783000 |
| 6 | 5.556005000  | -1.306697000 | -0.859110000 |
| 1 | 3.699981000  | -1.720920000 | -1.863823000 |
| 6 | 4.825865000  | 0.491933000  | -3.062475000 |
| 1 | 4.259332000  | 1.179015000  | -1.097080000 |
| 1 | 2.907852000  | 0.579412000  | -2.064547000 |
| 6 | 6.397323000  | -1.219242000 | -2.129648000 |
| 1 | 5.951365000  | -0.584446000 | -0.127513000 |
| 1 | 5.657147000  | -2.300655000 | -0.401561000 |
| 6 | 6.282003000  | 0.160890000  | -2.764876000 |
| 1 | 4.726862000  | 1.493821000  | -3.502812000 |
| 1 | 4.439396000  | -0.212330000 | -3.817908000 |
| 1 | 7.444392000  | -1.458067000 | -1.902630000 |
| 1 | 6.050506000  | -1.979847000 | -2.847893000 |
| 1 | 6.888026000  | 0.216150000  | -3.678155000 |
| 1 | 6.692490000  | 0.911334000  | -2.069397000 |
| 6 | -0.681351000 | -3.813869000 | -1.499332000 |
| 6 | -0.939297000 | -5.289982000 | -1.193667000 |
| 6 | -1.996528000 | -3.101470000 | -1.804456000 |
| 1 | -0.058382000 | -3.775310000 | -2.415624000 |
| 6 | -1.662241000 | -5.956801000 | -2.363111000 |
| 1 | -1.574206000 | -5.365702000 | -0.297235000 |
| 1 | -0.005524000 | -5.822658000 | -0.965705000 |
| 6 | -2.723127000 | -3.757752000 | -2.969839000 |
| 1 | -2.640766000 | -3.135872000 | -0.911248000 |
| 1 | -1.817250000 | -2.036761000 | -1.997377000 |
| 6 | -2.965472000 | -5.237463000 | -2.696211000 |
| 1 | -1.853047000 | -7.013184000 | -2.133712000 |

|   |              |              |              |
|---|--------------|--------------|--------------|
| 1 | -1.004082000 | -5.944021000 | -3.247175000 |
| 1 | -3.671599000 | -3.236685000 | -3.162099000 |
| 1 | -2.115432000 | -3.643433000 | -3.883712000 |
| 1 | -3.459738000 | -5.717579000 | -3.550372000 |
| 1 | -3.655960000 | -5.330270000 | -1.841616000 |
| 6 | -0.152844000 | -3.122832000 | 1.468821000  |
| 6 | -1.533991000 | -2.547442000 | 1.782924000  |
| 6 | 0.005637000  | -4.529411000 | 2.047045000  |
| 1 | 0.562262000  | -2.463277000 | 1.996491000  |
| 6 | -1.780031000 | -2.539859000 | 3.288165000  |
| 1 | -2.321896000 | -3.143094000 | 1.288932000  |
| 1 | -1.608568000 | -1.528565000 | 1.381618000  |
| 6 | -0.218649000 | -4.498185000 | 3.557199000  |
| 1 | -0.730813000 | -5.208157000 | 1.591609000  |
| 1 | 0.997229000  | -4.946818000 | 1.820735000  |
| 6 | -1.590232000 | -3.924086000 | 3.894794000  |
| 1 | -2.790938000 | -2.165296000 | 3.493920000  |
| 1 | -1.084459000 | -1.822517000 | 3.755030000  |
| 1 | -0.104364000 | -5.505995000 | 3.977703000  |
| 1 | 0.562487000  | -3.873593000 | 4.021248000  |
| 1 | -1.734539000 | -3.891889000 | 4.982279000  |
| 1 | -2.365022000 | -4.600199000 | 3.496952000  |

Method: M06-2X/6-31G(d,p) Key word: opt freq pop=full  
 imaginary frequencies: 0 Energy: -3599.248440 Hartree

### Int III

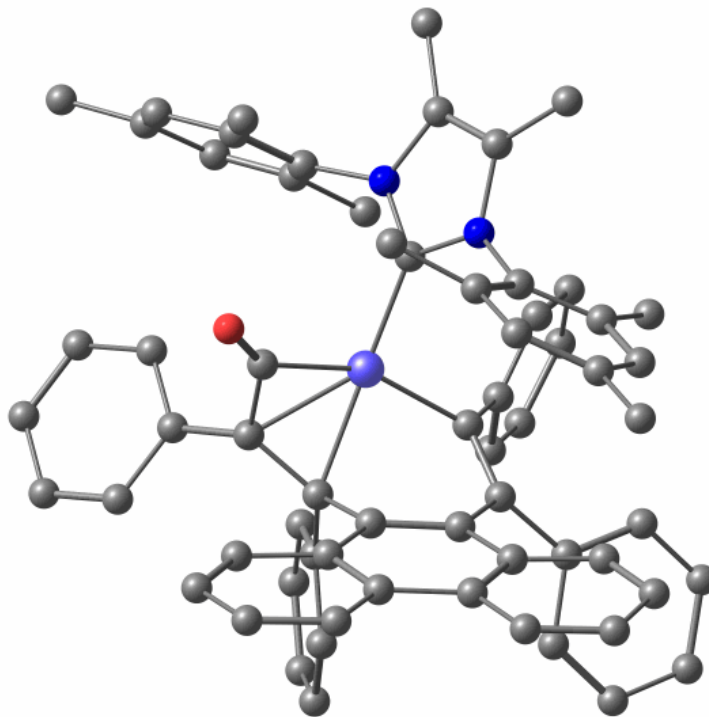

|   |              |              |              |
|---|--------------|--------------|--------------|
| 6 | -1.864844000 | -1.198885000 | -2.619767000 |
| 6 | -3.173568000 | -0.754204000 | -2.954440000 |

|    |              |              |              |
|----|--------------|--------------|--------------|
| 6  | -4.039559000 | -0.238055000 | -1.915204000 |
| 6  | -3.563088000 | -0.160860000 | -0.580540000 |
| 6  | -2.247415000 | -0.658913000 | -0.243369000 |
| 6  | -1.419465000 | -1.141149000 | -1.240806000 |
| 6  | -5.358369000 | 0.182953000  | -2.189697000 |
| 6  | -6.174558000 | 0.691987000  | -1.205895000 |
| 6  | -5.682571000 | 0.834258000  | 0.097993000  |
| 6  | -4.406130000 | 0.420137000  | 0.395713000  |
| 6  | -1.069037000 | -1.747042000 | -3.654288000 |
| 6  | -1.516674000 | -1.825206000 | -4.952711000 |
| 6  | -2.792491000 | -1.355667000 | -5.282986000 |
| 6  | -3.597786000 | -0.836464000 | -4.296418000 |
| 6  | -1.762424000 | -0.670578000 | 1.166870000  |
| 6  | -0.469271000 | -0.338907000 | 1.411863000  |
| 28 | 0.678039000  | 0.061011000  | -0.164727000 |
| 6  | 1.236781000  | -0.049252000 | -1.978333000 |
| 6  | 1.084667000  | -1.415006000 | -1.559918000 |
| 6  | -0.096359000 | -1.735022000 | -0.847714000 |
| 8  | 1.490349000  | 0.602115000  | -2.950698000 |
| 6  | 2.289360000  | -2.272019000 | -1.657901000 |
| 6  | -0.137467000 | -3.029375000 | -0.114119000 |
| 6  | 0.116894000  | -0.461391000 | 2.755074000  |
| 6  | 0.177850000  | -1.693648000 | 3.429185000  |
| 6  | 0.727893000  | -1.791103000 | 4.700532000  |
| 6  | 1.198904000  | -0.656704000 | 5.356052000  |
| 6  | 1.135314000  | 0.574023000  | 4.710131000  |
| 6  | 0.630512000  | 0.662962000  | 3.419012000  |
| 6  | 2.173381000  | -3.545146000 | -2.229084000 |
| 6  | 3.294242000  | -4.349492000 | -2.381628000 |
| 6  | 4.545971000  | -3.899213000 | -1.970545000 |
| 6  | 4.667605000  | -2.633926000 | -1.408332000 |
| 6  | 3.547735000  | -1.825173000 | -1.255826000 |
| 6  | 0.882351000  | -3.409997000 | 0.765174000  |
| 6  | 0.861870000  | -4.653080000 | 1.380528000  |
| 6  | -0.182459000 | -5.540879000 | 1.135064000  |
| 6  | -1.201489000 | -5.175657000 | 0.263532000  |
| 6  | -1.176788000 | -3.931392000 | -0.357622000 |
| 6  | -2.690139000 | -1.215533000 | 2.201341000  |
| 6  | -2.829441000 | -0.655528000 | 3.478649000  |
| 6  | -3.695616000 | -1.205754000 | 4.414881000  |
| 6  | -4.449866000 | -2.332004000 | 4.101909000  |
| 6  | -4.325359000 | -2.900883000 | 2.839343000  |
| 6  | -3.460429000 | -2.347907000 | 1.903800000  |
| 1  | -5.754470000 | 0.096310000  | -3.196951000 |
| 1  | -7.191077000 | 0.996052000  | -1.446504000 |
| 1  | -6.306933000 | 1.267383000  | 0.876529000  |
| 1  | -4.043552000 | 0.527676000  | 1.412545000  |
| 1  | -0.069757000 | -2.105055000 | -3.431473000 |
| 1  | -0.870965000 | -2.247566000 | -5.718715000 |
| 1  | -3.148784000 | -1.402525000 | -6.309156000 |
| 1  | -4.586647000 | -0.481266000 | -4.570282000 |
| 1  | -0.236489000 | -2.576661000 | 2.947104000  |
| 1  | 0.766342000  | -2.760613000 | 5.193399000  |
| 1  | 1.609941000  | -0.731554000 | 6.360216000  |
| 1  | 1.504758000  | 1.470240000  | 5.206218000  |
| 1  | 0.636716000  | 1.621506000  | 2.900900000  |
| 1  | 1.194769000  | -3.911654000 | -2.535483000 |
| 1  | 3.187557000  | -5.338197000 | -2.822021000 |
| 1  | 5.420097000  | -4.535760000 | -2.085124000 |
| 1  | 5.635447000  | -2.266949000 | -1.069962000 |

|   |              |              |              |
|---|--------------|--------------|--------------|
| 1 | 3.638444000  | -0.844552000 | -0.796003000 |
| 1 | 1.690876000  | -2.711191000 | 0.975583000  |
| 1 | 1.658529000  | -4.922668000 | 2.070507000  |
| 1 | -0.201032000 | -6.512442000 | 1.623209000  |
| 1 | -2.020445000 | -5.862186000 | 0.061194000  |
| 1 | -1.970468000 | -3.652677000 | -1.050093000 |
| 1 | -2.249105000 | 0.224946000  | 3.747298000  |
| 1 | -3.784136000 | -0.745879000 | 5.397038000  |
| 1 | -5.130170000 | -2.760072000 | 4.834576000  |
| 1 | -4.906934000 | -3.782470000 | 2.577489000  |
| 1 | -3.374129000 | -2.800518000 | 0.916891000  |
| 6 | 1.210751000  | 1.848263000  | 0.215140000  |
| 6 | 2.473655000  | 3.620262000  | 0.920352000  |
| 6 | 3.707044000  | 4.317344000  | 1.358283000  |
| 1 | 3.466785000  | 5.323606000  | 1.712974000  |
| 1 | 4.200961000  | 3.782139000  | 2.178470000  |
| 1 | 4.442815000  | 4.411947000  | 0.549841000  |
| 6 | 1.195501000  | 4.054706000  | 0.811585000  |
| 6 | 0.602029000  | 5.396806000  | 1.024489000  |
| 1 | 1.382106000  | 6.121890000  | 1.272968000  |
| 1 | 0.088130000  | 5.749007000  | 0.121392000  |
| 1 | -0.136739000 | 5.405798000  | 1.834847000  |
| 6 | -0.923222000 | 3.124479000  | -0.071927000 |
| 6 | -3.258424000 | 3.444287000  | 0.351317000  |
| 6 | -2.416470000 | 3.655881000  | -1.872777000 |
| 1 | -4.091569000 | 3.475073000  | 1.054420000  |
| 1 | -2.578810000 | 3.866862000  | -2.930289000 |
| 6 | 3.706325000  | 1.597203000  | 0.217681000  |
| 6 | 5.546434000  | 0.175158000  | 0.803308000  |
| 6 | 5.554037000  | 1.322132000  | -1.291914000 |
| 1 | 6.016187000  | -0.506800000 | 1.512893000  |
| 1 | 6.035017000  | 1.551040000  | -2.243295000 |
| 6 | -1.120122000 | 3.401223000  | -1.433471000 |
| 6 | 0.025695000  | 3.489386000  | -2.391550000 |
| 1 | -0.301712000 | 3.922370000  | -3.341526000 |
| 1 | 0.833527000  | 4.118418000  | -1.993960000 |
| 1 | 0.462197000  | 2.507706000  | -2.606478000 |
| 6 | -1.982972000 | 3.165462000  | 0.840217000  |
| 6 | -1.793510000 | 2.903385000  | 2.298798000  |
| 1 | -0.933909000 | 3.437378000  | 2.721213000  |
| 1 | -2.686222000 | 3.186566000  | 2.865497000  |
| 1 | -1.612903000 | 1.834775000  | 2.457092000  |
| 6 | -3.499982000 | 3.679508000  | -0.998162000 |
| 6 | -4.882704000 | 3.952922000  | -1.503119000 |
| 1 | -5.558637000 | 4.236778000  | -0.689149000 |
| 1 | -4.886449000 | 4.754843000  | -2.250197000 |
| 1 | -5.301585000 | 3.055217000  | -1.976048000 |
| 6 | 4.325887000  | 1.910911000  | -1.005974000 |
| 6 | 3.698955000  | 2.842997000  | -1.995544000 |
| 1 | 2.765011000  | 2.423209000  | -2.386629000 |
| 1 | 3.463754000  | 3.819718000  | -1.553972000 |
| 1 | 4.370750000  | 3.010456000  | -2.842274000 |
| 6 | 4.310781000  | 0.734084000  | 1.136696000  |
| 6 | 3.658897000  | 0.372153000  | 2.428535000  |
| 1 | 2.843118000  | -0.348086000 | 2.272873000  |
| 1 | 4.376651000  | -0.080361000 | 3.119649000  |
| 1 | 3.205790000  | 1.239080000  | 2.919672000  |
| 6 | 6.183777000  | 0.455047000  | -0.399933000 |
| 6 | 7.517135000  | -0.143506000 | -0.732088000 |
| 1 | 7.764567000  | -0.971869000 | -0.059456000 |

|   |             |              |              |
|---|-------------|--------------|--------------|
| 1 | 7.538304000 | -0.521312000 | -1.761165000 |
| 1 | 8.319242000 | 0.600334000  | -0.647716000 |
| 7 | 0.433747000 | 2.956523000  | 0.384946000  |
| 7 | 2.471730000 | 2.272755000  | 0.529440000  |

Method: M06-2X/6-31G(d,p) Key word: opt freq pop=full  
 imaginary frequencies: 0 Energy: -2899.961724 Hartree

## TS II

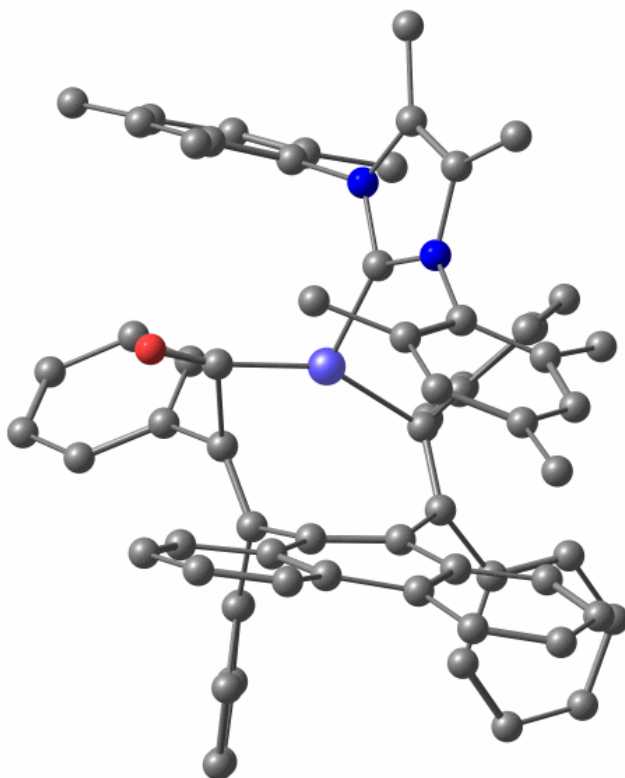

|    |              |              |              |
|----|--------------|--------------|--------------|
| 6  | 2.110103000  | 0.447428000  | -2.436852000 |
| 6  | 3.332362000  | -0.259591000 | -2.316609000 |
| 6  | 4.002151000  | -0.286255000 | -1.033978000 |
| 6  | 3.319961000  | 0.182393000  | 0.119102000  |
| 6  | 2.016412000  | 0.802709000  | -0.003488000 |
| 6  | 1.491125000  | 1.006470000  | -1.260052000 |
| 6  | 5.326137000  | -0.746751000 | -0.898029000 |
| 6  | 5.954976000  | -0.780381000 | 0.326804000  |
| 6  | 5.257301000  | -0.391709000 | 1.476833000  |
| 6  | 3.964253000  | 0.069910000  | 1.371393000  |
| 6  | 1.502726000  | 0.555055000  | -3.707671000 |
| 6  | 2.047203000  | -0.061572000 | -4.811654000 |
| 6  | 3.221244000  | -0.815395000 | -4.680653000 |
| 6  | 3.848515000  | -0.905685000 | -3.456730000 |
| 6  | 1.254904000  | 1.194438000  | 1.225906000  |
| 6  | 0.029304000  | 0.636576000  | 1.400456000  |
| 28 | -0.736334000 | -0.287082000 | -0.173051000 |
| 6  | -1.199393000 | -0.276512000 | -1.871167000 |

|   |              |              |              |
|---|--------------|--------------|--------------|
| 6 | -0.953111000 | 1.362472000  | -1.443249000 |
| 6 | 0.290801000  | 1.887757000  | -1.419224000 |
| 8 | -1.499059000 | -0.561099000 | -2.980742000 |
| 6 | -2.229036000 | 2.077276000  | -1.610834000 |
| 6 | 0.590152000  | 3.338609000  | -1.425596000 |
| 6 | -0.792553000 | 0.948963000  | 2.575441000  |
| 6 | -1.431475000 | 2.191889000  | 2.696684000  |
| 6 | -2.184687000 | 2.507649000  | 3.820640000  |
| 6 | -2.316389000 | 1.590881000  | 4.860771000  |
| 6 | -1.702046000 | 0.346610000  | 4.749029000  |
| 6 | -0.969563000 | 0.021976000  | 3.613623000  |
| 6 | -2.486659000 | 2.814527000  | -2.772168000 |
| 6 | -3.715039000 | 3.434655000  | -2.953161000 |
| 6 | -4.708126000 | 3.318650000  | -1.982884000 |
| 6 | -4.465734000 | 2.573841000  | -0.833021000 |
| 6 | -3.237682000 | 1.947777000  | -0.651501000 |
| 6 | -0.202078000 | 4.247408000  | -0.712956000 |
| 6 | 0.147325000  | 5.589215000  | -0.645325000 |
| 6 | 1.282986000  | 6.052667000  | -1.301169000 |
| 6 | 2.072279000  | 5.162780000  | -2.023516000 |
| 6 | 1.737418000  | 3.816256000  | -2.074005000 |
| 6 | 1.879792000  | 2.220289000  | 2.107811000  |
| 6 | 1.799841000  | 2.183611000  | 3.507460000  |
| 6 | 2.372597000  | 3.182813000  | 4.284455000  |
| 6 | 3.043197000  | 4.246029000  | 3.687810000  |
| 6 | 3.146064000  | 4.289663000  | 2.301655000  |
| 6 | 2.581029000  | 3.285790000  | 1.526306000  |
| 6 | -1.046773000 | -2.034779000 | 0.404684000  |
| 6 | -2.190218000 | -3.892906000 | 1.068093000  |
| 6 | -3.390290000 | -4.692676000 | 1.411844000  |
| 6 | -0.870332000 | -4.200019000 | 1.088946000  |
| 6 | -0.166754000 | -5.464138000 | 1.411892000  |
| 6 | 1.223395000  | -3.082189000 | 0.391486000  |
| 6 | 3.482250000  | -3.246472000 | 1.165043000  |
| 6 | 2.974028000  | -3.671090000 | -1.132683000 |
| 6 | -3.511156000 | -1.964350000 | 0.188103000  |
| 6 | -5.428320000 | -0.575646000 | 0.540797000  |
| 6 | -5.097157000 | -1.627587000 | -1.578885000 |
| 6 | 1.623871000  | -3.411962000 | -0.910852000 |
| 6 | 0.645821000  | -3.497366000 | -2.040859000 |
| 6 | 2.147168000  | -2.952145000 | 1.433187000  |
| 6 | 1.733077000  | -2.461895000 | 2.784060000  |
| 6 | 3.911339000  | -3.631288000 | -0.102529000 |
| 6 | 5.333139000  | -4.034739000 | -0.349725000 |
| 6 | -3.935401000 | -2.241682000 | -1.123831000 |
| 6 | -3.172647000 | -3.157688000 | -2.032840000 |
| 6 | -4.267864000 | -1.164672000 | 1.046726000  |
| 6 | -3.882121000 | -0.905745000 | 2.466740000  |
| 6 | -5.844106000 | -0.770569000 | -0.770474000 |
| 6 | -7.050315000 | -0.068550000 | -1.313058000 |
| 7 | -0.183721000 | -3.041880000 | 0.683506000  |
| 7 | -2.281901000 | -2.563675000 | 0.634574000  |
| 1 | 5.882729000  | -1.047826000 | -1.782383000 |
| 1 | 6.988880000  | -1.112737000 | 0.396824000  |
| 1 | 5.737281000  | -0.438000000 | 2.451864000  |
| 1 | 3.437566000  | 0.388983000  | 2.265771000  |
| 1 | 0.570192000  | 1.108476000  | -3.800332000 |
| 1 | 1.555292000  | 0.022222000  | -5.777520000 |
| 1 | 3.638635000  | -1.329943000 | -5.543002000 |
| 1 | 4.751673000  | -1.505744000 | -3.370846000 |



|   |              |              |              |
|---|--------------|--------------|--------------|
| 1 | -1.288887000 | 2.925526000  | 1.904001000  |
| 1 | -2.657586000 | 3.485146000  | 3.893554000  |
| 1 | -2.893967000 | 1.843096000  | 5.746979000  |
| 1 | -1.804325000 | -0.384258000 | 5.549531000  |
| 1 | -0.509553000 | -0.962360000 | 3.524125000  |
| 1 | -1.705819000 | 2.899874000  | -3.527164000 |
| 1 | -3.902283000 | 4.008542000  | -3.857915000 |
| 1 | -5.670833000 | 3.804830000  | -2.125928000 |
| 1 | -5.237453000 | 2.470930000  | -0.071820000 |
| 1 | -3.039948000 | 1.363522000  | 0.248869000  |
| 1 | -1.087504000 | 3.890375000  | -0.191984000 |
| 1 | -0.468013000 | 6.274640000  | -0.067763000 |
| 1 | 1.554772000  | 7.104167000  | -1.246846000 |
| 1 | 2.961396000  | 5.515836000  | -2.540642000 |
| 1 | 2.373924000  | 3.121524000  | -2.618732000 |
| 1 | 1.285770000  | 1.356844000  | 3.992965000  |
| 1 | 2.295976000  | 3.125907000  | 5.368374000  |
| 1 | 3.486670000  | 5.029085000  | 4.298755000  |
| 1 | 3.667659000  | 5.111002000  | 1.813809000  |
| 1 | 2.673205000  | 3.331382000  | 0.441949000  |
| 1 | -3.102355000 | -5.707011000 | 1.702491000  |
| 1 | -3.945965000 | -4.249936000 | 2.247974000  |
| 1 | -4.086485000 | -4.767264000 | 0.567559000  |
| 1 | -0.890601000 | -6.247897000 | 1.653008000  |
| 1 | 0.437065000  | -5.810383000 | 0.563271000  |
| 1 | 0.513548000  | -5.359753000 | 2.265845000  |
| 1 | 4.208625000  | -3.165381000 | 1.973754000  |
| 1 | 3.297173000  | -3.925911000 | -2.143258000 |
| 1 | -6.020704000 | 0.059636000  | 1.201842000  |
| 1 | -5.426620000 | -1.823155000 | -2.599858000 |
| 1 | 1.091515000  | -4.007249000 | -2.900471000 |
| 1 | -0.267385000 | -4.035855000 | -1.756471000 |
| 1 | 0.335197000  | -2.497576000 | -2.373713000 |
| 1 | 1.494075000  | -1.388917000 | 2.723048000  |
| 1 | 0.835848000  | -2.967908000 | 3.162208000  |
| 1 | 2.538033000  | -2.589253000 | 3.514564000  |
| 1 | 5.666593000  | -3.735839000 | -1.350647000 |
| 1 | 6.012567000  | -3.580678000 | 0.379301000  |
| 1 | 5.448818000  | -5.124331000 | -0.280941000 |
| 1 | -3.835155000 | -3.565098000 | -2.803241000 |
| 1 | -2.367134000 | -2.617352000 | -2.546550000 |
| 1 | -2.718567000 | -3.998248000 | -1.494640000 |
| 1 | -3.125605000 | -1.604931000 | 2.833392000  |
| 1 | -3.462900000 | 0.101693000  | 2.583272000  |
| 1 | -4.759526000 | -0.966534000 | 3.121005000  |
| 1 | -7.698876000 | 0.298026000  | -0.510151000 |
| 1 | -6.749015000 | 0.798645000  | -1.916024000 |
| 1 | -7.643762000 | -0.722728000 | -1.961556000 |

-----  
Method: M06-2X/6-31G(d,p) Key word: opt freq pop=full  
imaginary frequencies: -105.5699 cm<sup>-1</sup> Energy: -2899.945426 Hartree  
-----

**TS III**

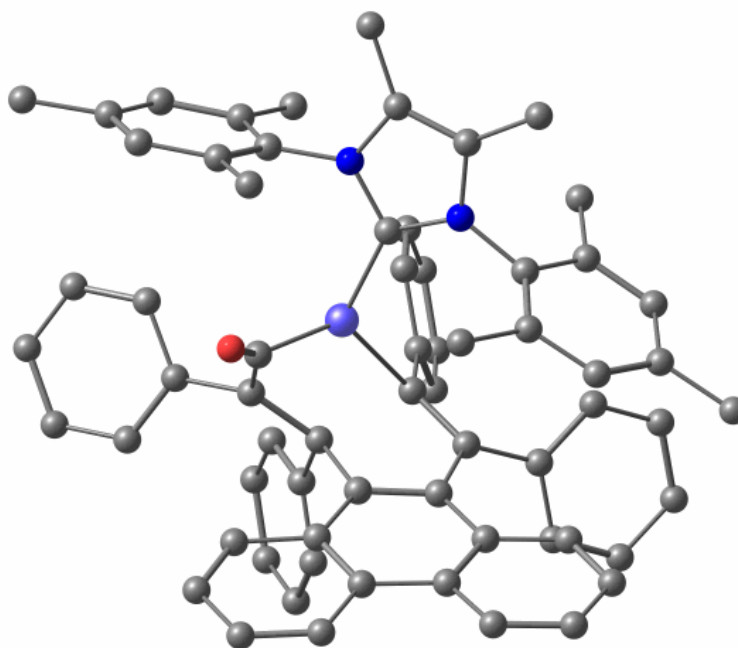

|    |              |              |              |
|----|--------------|--------------|--------------|
| 6  | -1.094891000 | -2.222452000 | -2.403499000 |
| 6  | -2.203640000 | -2.024099000 | -3.273417000 |
| 6  | -3.329082000 | -1.213842000 | -2.843251000 |
| 6  | -3.365273000 | -0.694403000 | -1.521322000 |
| 6  | -2.237185000 | -0.934939000 | -0.649843000 |
| 6  | -1.130331000 | -1.628769000 | -1.090351000 |
| 6  | -4.405499000 | -0.927171000 | -3.707644000 |
| 6  | -5.493051000 | -0.191320000 | -3.294574000 |
| 6  | -5.535742000 | 0.307218000  | -1.987841000 |
| 6  | -4.483125000 | 0.074989000  | -1.131261000 |
| 6  | -0.037148000 | -3.051256000 | -2.843749000 |
| 6  | -0.058486000 | -3.655071000 | -4.078836000 |
| 6  | -1.144427000 | -3.451540000 | -4.937442000 |
| 6  | -2.189813000 | -2.652501000 | -4.535057000 |
| 6  | -2.074862000 | -0.492226000 | 0.733922000  |
| 6  | -0.774107000 | -0.502574000 | 1.154515000  |
| 28 | 0.880613000  | 0.210623000  | -0.016980000 |
| 6  | 1.620405000  | -0.617829000 | -1.505246000 |
| 6  | 1.345409000  | -1.646598000 | -0.561034000 |
| 6  | -0.050532000 | -1.773846000 | -0.049382000 |
| 8  | 2.018342000  | -0.378682000 | -2.607602000 |
| 6  | 2.533095000  | -2.459707000 | -0.188864000 |
| 6  | -0.224582000 | -2.969603000 | 0.868410000  |
| 6  | -0.386404000 | -0.436415000 | 2.578941000  |
| 6  | -0.994309000 | -1.247799000 | 3.551868000  |
| 6  | -0.583669000 | -1.209235000 | 4.876168000  |
| 6  | 0.443941000  | -0.355880000 | 5.271804000  |
| 6  | 1.058534000  | 0.455992000  | 4.326278000  |
| 6  | 0.650601000  | 0.407114000  | 2.996746000  |
| 6  | 2.537868000  | -3.859306000 | -0.293402000 |
| 6  | 3.684414000  | -4.591006000 | -0.013296000 |
| 6  | 4.860140000  | -3.948437000 | 0.364474000  |
| 6  | 4.873408000  | -2.562095000 | 0.461090000  |
| 6  | 3.723028000  | -1.829548000 | 0.192500000  |
| 6  | 0.627702000  | -3.175005000 | 1.960355000  |

|   |              |              |              |
|---|--------------|--------------|--------------|
| 6 | 0.484949000  | -4.285739000 | 2.779715000  |
| 6 | -0.519831000 | -5.215590000 | 2.534834000  |
| 6 | -1.377169000 | -5.021434000 | 1.458832000  |
| 6 | -1.229723000 | -3.911789000 | 0.631705000  |
| 6 | -3.221263000 | -0.306381000 | 1.650871000  |
| 6 | -3.326946000 | 0.805533000  | 2.489642000  |
| 6 | -4.403174000 | 0.943220000  | 3.357778000  |
| 6 | -5.384147000 | -0.040960000 | 3.419592000  |
| 6 | -5.277311000 | -1.167799000 | 2.608267000  |
| 6 | -4.209180000 | -1.297181000 | 1.730882000  |
| 1 | -4.385605000 | -1.288430000 | -4.731338000 |
| 1 | -6.310488000 | 0.002698000  | -3.985119000 |
| 1 | -6.388983000 | 0.892474000  | -1.650862000 |
| 1 | -4.510209000 | 0.502474000  | -0.134962000 |
| 1 | 0.823503000  | -3.198313000 | -2.202529000 |
| 1 | 0.773962000  | -4.283905000 | -4.384466000 |
| 1 | -1.168083000 | -3.923700000 | -5.916684000 |
| 1 | -3.030004000 | -2.526062000 | -5.210537000 |
| 1 | -1.784717000 | -1.934141000 | 3.252717000  |
| 1 | -1.064660000 | -1.858021000 | 5.604768000  |
| 1 | 0.764181000  | -0.328585000 | 6.310851000  |
| 1 | 1.862217000  | 1.129487000  | 4.619924000  |
| 1 | 1.136409000  | 1.039211000  | 2.252589000  |
| 1 | 1.625691000  | -4.385216000 | -0.570106000 |
| 1 | 3.657149000  | -5.675553000 | -0.093408000 |
| 1 | 5.754787000  | -4.526098000 | 0.585463000  |
| 1 | 5.780040000  | -2.037962000 | 0.762787000  |
| 1 | 3.735387000  | -0.745420000 | 0.284506000  |
| 1 | 1.413544000  | -2.454569000 | 2.175756000  |
| 1 | 1.161539000  | -4.416222000 | 3.621110000  |
| 1 | -0.631268000 | -6.086423000 | 3.176644000  |
| 1 | -2.164455000 | -5.742123000 | 1.249180000  |
| 1 | -1.900817000 | -3.787390000 | -0.215018000 |
| 1 | -2.557600000 | 1.571650000  | 2.444138000  |
| 1 | -4.470755000 | 1.824829000  | 3.992734000  |
| 1 | -6.225122000 | 0.065185000  | 4.100878000  |
| 1 | -6.031768000 | -1.949635000 | 2.658989000  |
| 1 | -4.127542000 | -2.176896000 | 1.093129000  |
| 6 | 1.181189000  | 2.095637000  | -0.156512000 |
| 6 | 2.341012000  | 4.074567000  | -0.317132000 |
| 6 | 3.545072000  | 4.940508000  | -0.318439000 |
| 1 | 3.256997000  | 5.994733000  | -0.361217000 |
| 1 | 4.139419000  | 4.790841000  | 0.591818000  |
| 1 | 4.208210000  | 4.735713000  | -1.167825000 |
| 6 | 1.022447000  | 4.375870000  | -0.391792000 |
| 6 | 0.327089000  | 5.667967000  | -0.606450000 |
| 1 | 1.057225000  | 6.467716000  | -0.760134000 |
| 1 | -0.317759000 | 5.626412000  | -1.493479000 |
| 1 | -0.312415000 | 5.953431000  | 0.237993000  |
| 6 | -1.089275000 | 3.119472000  | -0.269346000 |
| 6 | -3.141669000 | 3.640867000  | 0.833870000  |
| 6 | -3.151903000 | 2.942205000  | -1.459242000 |
| 1 | -3.685321000 | 3.941424000  | 1.731732000  |
| 1 | -3.697543000 | 2.692710000  | -2.369993000 |
| 6 | 3.673786000  | 2.003489000  | -0.295208000 |
| 6 | 5.625126000  | 1.026050000  | 0.687044000  |
| 6 | 5.432433000  | 1.180826000  | -1.694385000 |
| 1 | 6.183087000  | 0.726029000  | 1.575608000  |
| 1 | 5.845845000  | 1.005846000  | -2.688095000 |
| 6 | -1.763932000 | 2.812884000  | -1.452825000 |

|   |              |              |              |
|---|--------------|--------------|--------------|
| 6 | -1.018981000 | 2.353696000  | -2.668252000 |
| 1 | -1.709313000 | 2.128445000  | -3.486830000 |
| 1 | -0.304284000 | 3.111654000  | -3.019146000 |
| 1 | -0.432413000 | 1.449041000  | -2.456178000 |
| 6 | -1.757292000 | 3.517759000  | 0.892897000  |
| 6 | -1.008446000 | 3.776546000  | 2.165844000  |
| 1 | -0.282460000 | 4.594425000  | 2.071129000  |
| 1 | -1.698236000 | 4.032139000  | 2.977001000  |
| 1 | -0.438830000 | 2.888097000  | 2.474724000  |
| 6 | -3.853820000 | 3.364900000  | -0.332296000 |
| 6 | -5.346436000 | 3.495677000  | -0.341162000 |
| 1 | -5.810851000 | 2.727980000  | 0.294083000  |
| 1 | -5.664087000 | 4.467391000  | 0.055063000  |
| 1 | -5.756029000 | 3.390685000  | -1.350715000 |
| 6 | 4.200216000  | 1.812801000  | -1.583964000 |
| 6 | 3.466147000  | 2.291223000  | -2.798785000 |
| 1 | 2.475853000  | 1.828665000  | -2.864389000 |
| 1 | 3.330568000  | 3.380742000  | -2.789445000 |
| 1 | 4.013803000  | 2.024758000  | -3.707345000 |
| 6 | 4.378711000  | 1.636180000  | 0.851349000  |
| 6 | 3.823533000  | 1.824533000  | 2.228906000  |
| 1 | 3.330285000  | 0.902428000  | 2.568451000  |
| 1 | 4.622189000  | 2.046764000  | 2.944851000  |
| 1 | 3.078499000  | 2.627628000  | 2.277897000  |
| 6 | 6.157323000  | 0.773779000  | -0.571873000 |
| 6 | 7.471322000  | 0.072606000  | -0.736016000 |
| 1 | 7.974846000  | -0.070436000 | 0.225986000  |
| 1 | 7.330022000  | -0.916944000 | -1.189314000 |
| 1 | 8.146746000  | 0.632624000  | -1.393321000 |
| 7 | 0.338935000  | 3.159261000  | -0.274198000 |
| 7 | 2.418528000  | 2.685193000  | -0.185865000 |

---

Method: M06-2X/6-31G(d,p) Key word: opt freq pop=full  
 imaginary frequencies: -197.3036 cm<sup>-1</sup> Energy: -2899.939208 Hartree

---

#### Int IV

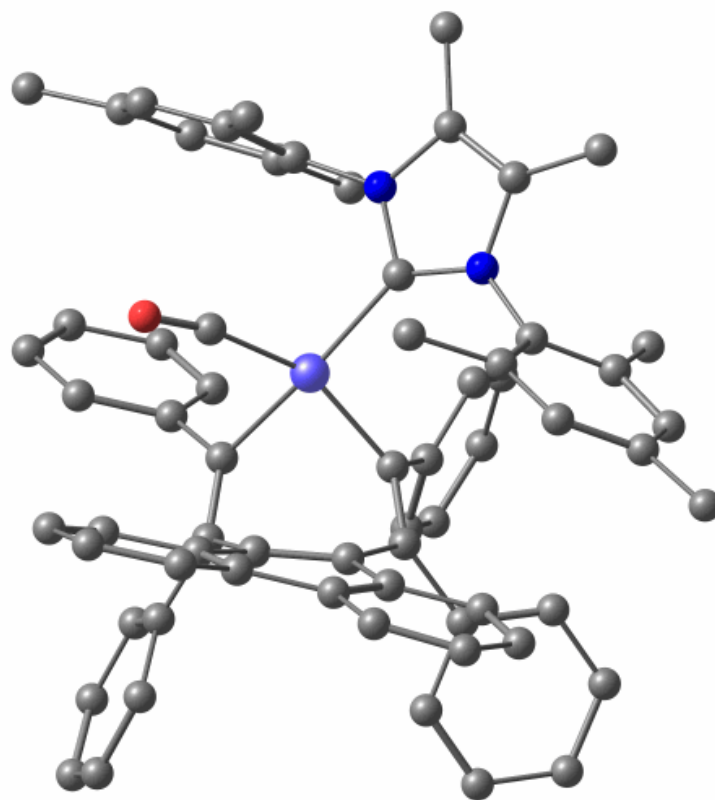

|    |              |              |              |
|----|--------------|--------------|--------------|
| 6  | 1.471946000  | 2.148543000  | -2.378043000 |
| 6  | 2.546429000  | 1.580185000  | -3.105296000 |
| 6  | 3.489979000  | 0.731279000  | -2.407073000 |
| 6  | 3.220800000  | 0.347464000  | -1.064878000 |
| 6  | 2.040357000  | 0.843809000  | -0.380899000 |
| 6  | 1.274020000  | 1.816399000  | -0.984259000 |
| 6  | 4.684927000  | 0.298606000  | -3.015973000 |
| 6  | 5.613973000  | -0.451660000 | -2.329807000 |
| 6  | 5.351945000  | -0.829311000 | -1.008088000 |
| 6  | 4.167433000  | -0.467948000 | -0.406855000 |
| 6  | 0.573423000  | 3.006187000  | -3.051806000 |
| 6  | 0.715373000  | 3.286815000  | -4.390977000 |
| 6  | 1.769411000  | 2.711827000  | -5.113138000 |
| 6  | 2.661550000  | 1.876049000  | -4.478591000 |
| 6  | 1.673789000  | 0.382734000  | 0.987336000  |
| 6  | 0.402968000  | -0.019118000 | 1.247595000  |
| 28 | -0.851649000 | -0.141355000 | -0.231209000 |
| 6  | -1.588562000 | 0.330264000  | -1.816312000 |
| 6  | -0.894788000 | 1.763657000  | 0.068012000  |
| 6  | 0.178767000  | 2.514743000  | -0.243397000 |
| 8  | -1.870944000 | 0.777649000  | -2.835830000 |
| 6  | -2.236182000 | 2.190063000  | 0.495002000  |
| 6  | 0.423047000  | 3.917203000  | 0.177054000  |
| 6  | -0.111824000 | -0.133394000 | 2.622489000  |
| 6  | 0.041015000  | 0.945033000  | 3.513334000  |
| 6  | -0.494840000 | 0.902555000  | 4.792382000  |
| 6  | -1.201956000 | -0.218042000 | 5.223566000  |
| 6  | -1.377348000 | -1.287221000 | 4.352243000  |
| 6  | -0.851317000 | -1.236873000 | 3.064807000  |

|   |              |              |              |
|---|--------------|--------------|--------------|
| 6 | -3.004275000 | 2.962190000  | -0.394105000 |
| 6 | -4.308772000 | 3.325497000  | -0.087881000 |
| 6 | -4.886774000 | 2.924680000  | 1.114240000  |
| 6 | -4.142867000 | 2.151312000  | 1.999814000  |
| 6 | -2.839430000 | 1.777970000  | 1.692696000  |
| 6 | -0.358302000 | 4.537069000  | 1.167739000  |
| 6 | -0.090910000 | 5.829642000  | 1.594612000  |
| 6 | 0.976457000  | 6.545927000  | 1.062176000  |
| 6 | 1.781265000  | 5.940674000  | 0.104903000  |
| 6 | 1.512453000  | 4.647692000  | -0.326651000 |
| 6 | 2.692221000  | 0.576191000  | 2.054160000  |
| 6 | 2.976940000  | -0.408781000 | 3.007425000  |
| 6 | 3.912697000  | -0.184080000 | 4.008763000  |
| 6 | 4.590248000  | 1.029863000  | 4.075990000  |
| 6 | 4.328331000  | 2.012684000  | 3.126572000  |
| 6 | 3.394202000  | 1.785906000  | 2.123419000  |
| 6 | -1.137426000 | -2.081933000 | -0.241510000 |
| 6 | -2.393355000 | -3.990754000 | -0.396813000 |
| 6 | -3.643069000 | -4.779502000 | -0.511531000 |
| 6 | -1.095784000 | -4.368295000 | -0.294629000 |
| 6 | -0.472159000 | -5.712345000 | -0.356553000 |
| 6 | 1.087626000  | -3.237767000 | -0.161117000 |
| 6 | 3.113913000  | -3.983258000 | 0.871015000  |
| 6 | 3.131720000  | -3.261720000 | -1.408457000 |
| 6 | -3.567578000 | -1.811377000 | -0.642478000 |
| 6 | -5.407667000 | -0.476289000 | 0.094268000  |
| 6 | -4.995122000 | -0.753081000 | -2.246680000 |
| 6 | 1.772768000  | -2.968992000 | -1.354160000 |
| 6 | 1.079219000  | -2.372662000 | -2.539186000 |
| 6 | 1.747679000  | -3.724122000 | 0.973103000  |
| 6 | 1.051394000  | -3.979223000 | 2.276066000  |
| 6 | 3.814625000  | -3.791659000 | -0.315866000 |
| 6 | 5.263999000  | -4.158338000 | -0.413039000 |
| 6 | -3.914360000 | -1.591713000 | -1.981417000 |
| 6 | -3.159299000 | -2.230242000 | -3.108903000 |
| 6 | -4.326656000 | -1.292935000 | 0.412427000  |
| 6 | -4.002844000 | -1.588660000 | 1.841779000  |
| 6 | -5.736676000 | -0.167604000 | -1.223830000 |
| 6 | -6.855064000 | 0.783470000  | -1.517519000 |
| 7 | -0.347704000 | -3.184655000 | -0.173537000 |
| 7 | -2.397826000 | -2.595193000 | -0.365956000 |
| 1 | 4.906400000  | 0.600851000  | -4.036024000 |
| 1 | 6.546455000  | -0.738487000 | -2.811208000 |
| 1 | 6.077347000  | -1.420752000 | -0.453434000 |
| 1 | 3.966982000  | -0.808252000 | 0.604053000  |
| 1 | -0.254439000 | 3.434744000  | -2.491623000 |
| 1 | 0.005036000  | 3.943447000  | -4.887397000 |
| 1 | 1.881628000  | 2.917771000  | -6.175132000 |
| 1 | 3.461024000  | 1.427205000  | -5.061735000 |
| 1 | 0.577792000  | 1.829729000  | 3.172341000  |
| 1 | -0.364161000 | 1.753323000  | 5.457548000  |
| 1 | -1.620983000 | -0.251961000 | 6.226576000  |
| 1 | -1.944353000 | -2.162472000 | 4.666494000  |
| 1 | -1.028054000 | -2.062144000 | 2.376022000  |
| 1 | -2.554325000 | 3.274359000  | -1.336070000 |
| 1 | -4.875968000 | 3.933762000  | -0.790458000 |
| 1 | -5.908416000 | 3.211440000  | 1.355771000  |
| 1 | -4.579763000 | 1.825823000  | 2.942886000  |
| 1 | -2.267383000 | 1.183312000  | 2.401048000  |
| 1 | -1.177449000 | 3.991043000  | 1.626939000  |

|   |              |              |              |
|---|--------------|--------------|--------------|
| 1 | -0.717985000 | 6.275799000  | 2.363684000  |
| 1 | 1.186575000  | 7.557629000  | 1.401319000  |
| 1 | 2.632130000  | 6.475226000  | -0.312189000 |
| 1 | 2.166148000  | 4.195448000  | -1.068159000 |
| 1 | 2.460455000  | -1.366309000 | 2.941857000  |
| 1 | 4.117639000  | -0.963590000 | 4.739867000  |
| 1 | 5.323419000  | 1.205345000  | 4.859997000  |
| 1 | 4.853265000  | 2.964760000  | 3.168144000  |
| 1 | 3.183825000  | 2.560147000  | 1.384709000  |
| 1 | -3.429228000 | -5.849447000 | -0.438728000 |
| 1 | -4.348320000 | -4.520341000 | 0.287784000  |
| 1 | -4.160082000 | -4.600519000 | -1.463037000 |
| 1 | -1.218799000 | -6.456875000 | -0.647533000 |
| 1 | 0.335499000  | -5.734291000 | -1.098668000 |
| 1 | -0.038941000 | -6.028259000 | 0.600422000  |
| 1 | 3.638127000  | -4.370944000 | 1.745786000  |
| 1 | 3.676675000  | -3.046849000 | -2.328324000 |
| 1 | -6.000641000 | -0.052878000 | 0.905299000  |
| 1 | -5.255356000 | -0.542985000 | -3.284457000 |
| 1 | 1.742654000  | -2.353726000 | -3.409140000 |
| 1 | 0.169663000  | -2.927906000 | -2.807121000 |
| 1 | 0.778224000  | -1.335502000 | -2.328304000 |
| 1 | 1.061287000  | -3.083638000 | 2.912021000  |
| 1 | -0.001405000 | -4.252673000 | 2.149386000  |
| 1 | 1.550790000  | -4.781116000 | 2.830049000  |
| 1 | 5.390375000  | -5.240613000 | -0.544332000 |
| 1 | 5.745228000  | -3.662819000 | -1.262863000 |
| 1 | 5.808807000  | -3.879813000 | 0.496967000  |
| 1 | -3.331212000 | -1.688599000 | -4.044134000 |
| 1 | -2.078011000 | -2.256159000 | -2.929530000 |
| 1 | -3.478633000 | -3.269776000 | -3.265840000 |
| 1 | -3.614719000 | -2.605711000 | 1.979654000  |
| 1 | -3.235588000 | -0.903435000 | 2.222622000  |
| 1 | -4.891329000 | -1.467764000 | 2.470293000  |
| 1 | -7.748895000 | 0.547331000  | -0.928635000 |
| 1 | -6.558511000 | 1.808039000  | -1.255267000 |
| 1 | -7.130301000 | 0.774073000  | -2.576886000 |

Method: M06-2X/6-31G(d,p) Key word: opt freq pop=full  
imaginary frequencies: 0 Energy: -2899.959223 Hartree

**Int V**

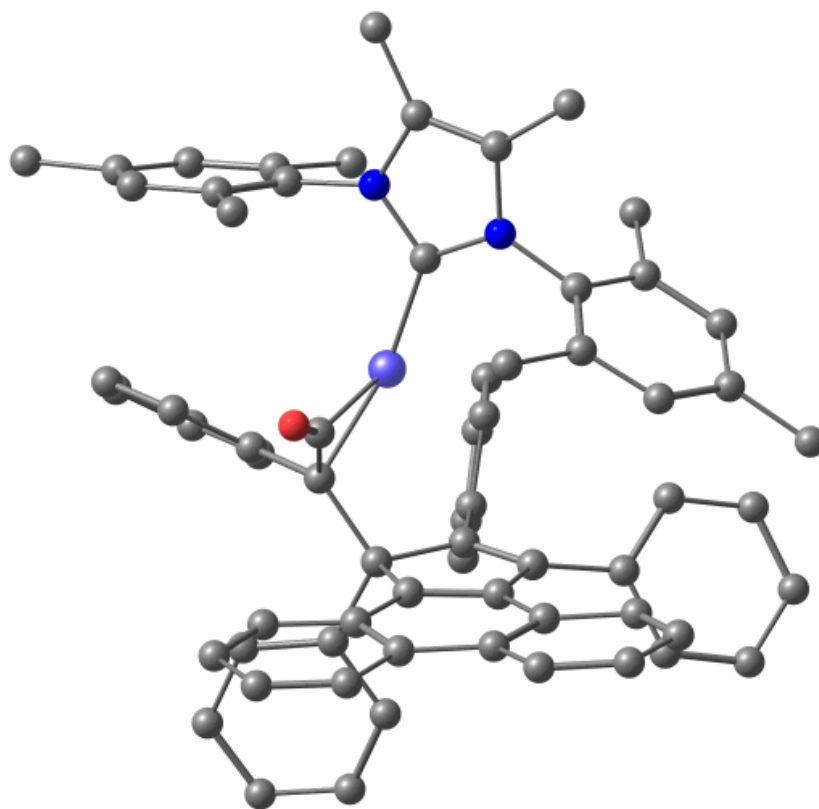

|    |              |              |              |
|----|--------------|--------------|--------------|
| 6  | -1.783642000 | -2.200656000 | -2.260128000 |
| 6  | -2.788811000 | -1.775439000 | -3.171567000 |
| 6  | -3.717463000 | -0.728955000 | -2.783219000 |
| 6  | -3.678284000 | -0.189404000 | -1.466075000 |
| 6  | -2.686659000 | -0.690726000 | -0.551993000 |
| 6  | -1.751576000 | -1.610399000 | -0.958977000 |
| 6  | -4.662095000 | -0.203945000 | -3.688290000 |
| 6  | -5.537620000 | 0.796198000  | -3.327763000 |
| 6  | -5.499022000 | 1.322626000  | -2.030814000 |
| 6  | -4.582151000 | 0.839360000  | -1.124001000 |
| 6  | -0.861489000 | -3.189588000 | -2.667329000 |
| 6  | -0.938849000 | -3.765637000 | -3.912361000 |
| 6  | -1.943842000 | -3.367639000 | -4.804496000 |
| 6  | -2.841502000 | -2.390513000 | -4.438674000 |
| 6  | -2.429812000 | -0.344670000 | 0.858419000  |
| 6  | -1.322601000 | -1.003103000 | 1.274597000  |
| 28 | 1.146338000  | 0.269946000  | 0.060913000  |
| 6  | 0.891694000  | -0.832424000 | -1.360890000 |
| 6  | 0.667909000  | -1.613425000 | -0.188724000 |
| 6  | -0.796025000 | -1.943165000 | 0.187206000  |
| 8  | 0.974351000  | -0.740642000 | -2.551752000 |
| 6  | 1.905027000  | -2.218054000 | 0.379591000  |
| 6  | -1.073365000 | -3.405432000 | 0.603903000  |
| 6  | -0.694494000 | -0.873070000 | 2.603842000  |
| 6  | -0.934813000 | -1.787193000 | 3.633043000  |
| 6  | -0.279364000 | -1.664378000 | 4.854502000  |
| 6  | 0.622756000  | -0.627707000 | 5.069373000  |
| 6  | 0.853409000  | 0.303033000  | 4.061011000  |



|   |              |              |              |
|---|--------------|--------------|--------------|
| 6 | 0.194777000  | 0.182366000  | 2.843447000  |
| 6 | 2.984013000  | -2.505456000 | -0.478759000 |
| 6 | 4.151338000  | -3.086622000 | -0.004518000 |
| 6 | 4.284564000  | -3.408929000 | 1.342552000  |
| 6 | 3.228118000  | -3.133822000 | 2.204974000  |
| 6 | 2.060518000  | -2.544539000 | 1.737545000  |
| 6 | -0.179568000 | -4.455477000 | 0.393026000  |
| 6 | -0.514793000 | -5.763542000 | 0.736494000  |
| 6 | -1.751572000 | -6.053848000 | 1.293380000  |
| 6 | -2.659724000 | -5.019276000 | 1.497684000  |
| 6 | -2.323221000 | -3.717499000 | 1.155368000  |
| 6 | -3.311968000 | 0.411805000  | 1.771546000  |
| 6 | -2.868066000 | 1.523192000  | 2.489386000  |
| 6 | -3.706566000 | 2.165199000  | 3.395492000  |
| 6 | -5.001951000 | 1.704694000  | 3.602392000  |
| 6 | -5.454913000 | 0.592247000  | 2.897349000  |
| 6 | -4.616941000 | -0.049055000 | 1.995450000  |
| 1 | -4.699631000 | -0.581536000 | -4.705913000 |
| 1 | -6.251608000 | 1.178609000  | -4.053572000 |
| 1 | -6.180835000 | 2.118976000  | -1.738698000 |
| 1 | -4.535999000 | 1.272024000  | -0.129404000 |
| 1 | -0.070378000 | -3.484243000 | -1.984609000 |
| 1 | -0.218911000 | -4.526282000 | -4.204104000 |
| 1 | -2.014924000 | -3.826087000 | -5.788094000 |
| 1 | -3.611867000 | -2.101732000 | -5.148177000 |
| 1 | -1.626959000 | -2.609692000 | 3.464710000  |
| 1 | -0.474690000 | -2.387595000 | 5.642962000  |
| 1 | 1.135729000  | -0.538460000 | 6.024084000  |
| 1 | 1.543877000  | 1.128900000  | 4.223084000  |
| 1 | 0.354995000  | 0.930801000  | 2.057238000  |
| 1 | 2.893330000  | -2.278483000 | -1.541009000 |
| 1 | 4.958361000  | -3.301518000 | -0.703606000 |
| 1 | 5.194933000  | -3.875385000 | 1.713311000  |
| 1 | 3.305716000  | -3.383486000 | 3.261525000  |
| 1 | 1.244411000  | -2.361949000 | 2.429183000  |
| 1 | 0.797158000  | -4.265277000 | -0.041962000 |
| 1 | 0.207666000  | -6.557859000 | 0.562925000  |
| 1 | -2.010033000 | -7.075582000 | 1.561425000  |
| 1 | -3.639848000 | -5.225279000 | 1.922365000  |
| 1 | -3.047656000 | -2.920750000 | 1.319119000  |
| 1 | -1.859965000 | 1.895646000  | 2.322695000  |
| 1 | -3.341850000 | 3.033933000  | 3.940646000  |
| 1 | -5.656447000 | 2.207371000  | 4.310599000  |
| 1 | -6.464300000 | 0.219087000  | 3.054775000  |
| 1 | -4.974754000 | -0.915421000 | 1.439231000  |
| 6 | 1.826203000  | 1.990789000  | -0.326340000 |
| 6 | 3.314786000  | 3.588531000  | -1.005491000 |
| 6 | 4.654544000  | 4.136191000  | -1.323698000 |
| 1 | 4.587213000  | 5.201153000  | -1.564038000 |
| 1 | 5.339140000  | 4.024125000  | -0.472952000 |
| 1 | 5.120404000  | 3.625099000  | -2.175734000 |
| 6 | 2.087377000  | 4.168469000  | -0.972889000 |
| 6 | 1.640763000  | 5.537752000  | -1.322271000 |
| 1 | 2.476586000  | 6.121658000  | -1.718502000 |
| 1 | 0.853514000  | 5.513436000  | -2.086224000 |
| 1 | 1.230559000  | 6.078459000  | -0.459690000 |
| 6 | -0.192188000 | 3.406419000  | -0.298936000 |
| 6 | -1.888417000 | 4.333703000  | 1.113254000  |
| 6 | -2.475849000 | 3.357444000  | -0.994118000 |
| 1 | -2.181361000 | 4.819473000  | 2.045572000  |

|   |              |              |              |
|---|--------------|--------------|--------------|
| 1 | -3.230063000 | 3.083825000  | -1.731862000 |
| 6 | 4.163990000  | 1.275574000  | -0.561852000 |
| 6 | 5.767199000  | 0.025499000  | 0.693978000  |
| 6 | 5.600900000  | -0.270389000 | -1.679089000 |
| 1 | 6.221797000  | -0.239209000 | 1.649373000  |
| 1 | 5.925763000  | -0.767457000 | -2.594223000 |
| 6 | -1.143293000 | 3.044335000  | -1.258651000 |
| 6 | -0.758322000 | 2.352177000  | -2.529074000 |
| 1 | -1.646293000 | 2.129828000  | -3.130325000 |
| 1 | -0.075601000 | 2.964981000  | -3.133992000 |
| 1 | -0.238614000 | 1.405042000  | -2.336890000 |
| 6 | -0.546119000 | 4.029930000  | 0.903414000  |
| 6 | 0.486714000  | 4.316747000  | 1.952755000  |
| 1 | 1.153031000  | 5.144862000  | 1.675838000  |
| 1 | 0.010428000  | 4.578964000  | 2.902976000  |
| 1 | 1.131261000  | 3.442350000  | 2.121007000  |
| 6 | -2.867399000 | 4.002841000  | 0.176819000  |
| 6 | -4.313849000 | 4.272646000  | 0.455865000  |
| 1 | -4.749878000 | 3.455185000  | 1.050307000  |
| 1 | -4.449876000 | 5.193677000  | 1.033775000  |
| 1 | -4.893942000 | 4.358195000  | -0.469270000 |
| 6 | 4.562789000  | 0.656872000  | -1.750347000 |
| 6 | 3.871775000  | 0.956798000  | -3.045002000 |
| 1 | 2.787988000  | 0.802322000  | -2.957574000 |
| 1 | 4.025898000  | 1.995036000  | -3.368426000 |
| 1 | 4.241666000  | 0.303273000  | -3.840744000 |
| 6 | 4.735894000  | 0.959504000  | 0.674433000  |
| 6 | 4.227664000  | 1.578704000  | 1.940326000  |
| 1 | 3.261602000  | 1.134729000  | 2.222870000  |
| 1 | 4.926513000  | 1.412728000  | 2.765828000  |
| 1 | 4.064364000  | 2.659253000  | 1.833897000  |
| 6 | 6.222713000  | -0.586057000 | -0.473020000 |
| 6 | 7.365282000  | -1.554819000 | -0.426681000 |
| 1 | 7.314120000  | -2.193151000 | 0.463160000  |
| 1 | 7.379481000  | -2.202424000 | -1.310225000 |
| 1 | 8.329285000  | -1.031302000 | -0.391090000 |
| 7 | 1.196837000  | 3.174610000  | -0.551177000 |
| 7 | 3.127465000  | 2.260113000  | -0.615024000 |

-----  
Method: M06-2X/6-31G(d,p) Key word: opt freq pop=full  
imaginary frequencies: 0 Energy: -2899.980783 Hartree  
-----

**Int III'**

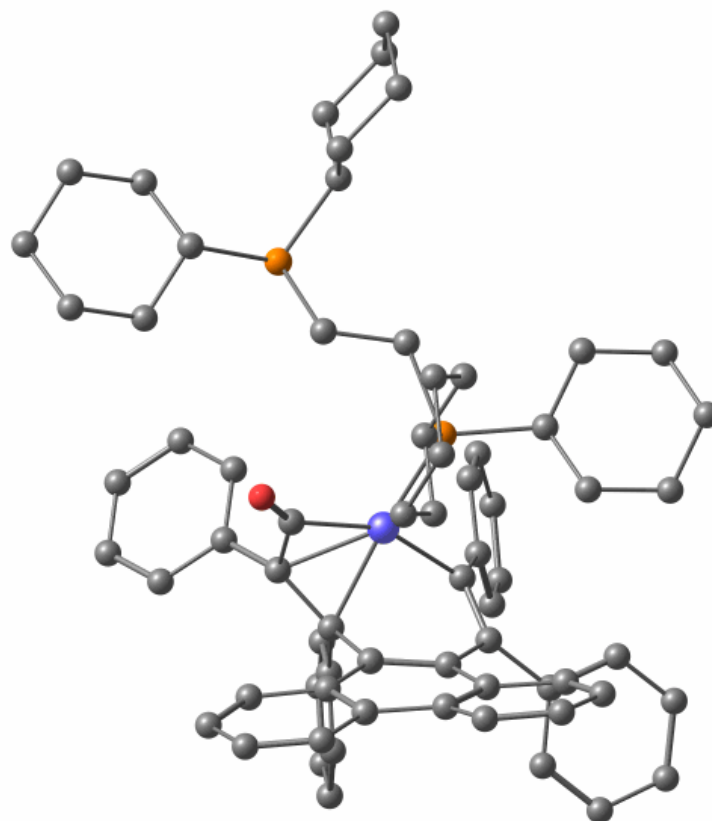

|    |              |              |              |
|----|--------------|--------------|--------------|
| 6  | -2.607792000 | 1.372219000  | 2.636277000  |
| 6  | -3.228217000 | 0.442044000  | 3.511208000  |
| 6  | -3.753109000 | -0.795457000 | 2.972266000  |
| 6  | -3.784996000 | -0.989352000 | 1.565583000  |
| 6  | -3.172648000 | -0.019551000 | 0.681853000  |
| 6  | -2.516222000 | 1.078324000  | 1.222822000  |
| 6  | -4.208370000 | -1.834022000 | 3.810704000  |
| 6  | -4.685781000 | -3.019387000 | 3.299871000  |
| 6  | -4.737921000 | -3.206123000 | 1.912599000  |
| 6  | -4.300602000 | -2.210542000 | 1.070482000  |
| 6  | -2.144129000 | 2.595032000  | 3.172998000  |
| 6  | -2.257250000 | 2.882550000  | 4.513037000  |
| 6  | -2.841971000 | 1.950639000  | 5.379548000  |
| 6  | -3.319481000 | 0.759970000  | 4.880929000  |
| 6  | -3.121601000 | -0.217399000 | -0.794036000 |
| 6  | -1.932144000 | 0.039610000  | -1.398114000 |
| 28 | -0.489941000 | 0.396671000  | -0.127506000 |
| 6  | 0.338136000  | 1.240310000  | 1.384016000  |
| 6  | -0.371639000 | 2.269311000  | 0.664639000  |
| 6  | -1.719076000 | 1.978763000  | 0.311532000  |
| 8  | 0.990257000  | 1.059836000  | 2.371412000  |
| 15 | 0.590967000  | -1.525329000 | -0.038802000 |
| 15 | 4.605647000  | 0.362064000  | -0.789701000 |
| 6  | 2.344941000  | -1.359016000 | -0.621670000 |
| 6  | 3.168692000  | -0.353599000 | 0.172209000  |
| 6  | 0.494224000  | 3.307921000  | 0.053369000  |
| 6  | -2.473815000 | 2.873929000  | -0.602939000 |
| 6  | -1.704954000 | 0.279639000  | -2.825123000 |

|   |              |              |              |
|---|--------------|--------------|--------------|
| 6 | -2.665967000 | 0.885759000  | -3.657246000 |
| 6 | -2.369154000 | 1.222552000  | -4.969788000 |
| 6 | -1.107457000 | 0.965751000  | -5.500665000 |
| 6 | -0.134464000 | 0.384611000  | -4.693992000 |
| 6 | -0.429985000 | 0.063250000  | -3.375550000 |
| 6 | 0.295813000  | 4.651949000  | 0.381660000  |
| 6 | 1.132280000  | 5.631638000  | -0.137132000 |
| 6 | 2.185006000  | 5.283825000  | -0.979298000 |
| 6 | 2.387519000  | 3.949362000  | -1.314790000 |
| 6 | 1.543310000  | 2.968290000  | -0.806537000 |
| 6 | -1.946615000 | 3.351902000  | -1.809018000 |
| 6 | -2.684988000 | 4.209419000  | -2.612987000 |
| 6 | -3.964130000 | 4.605242000  | -2.235477000 |
| 6 | -4.498995000 | 4.139627000  | -1.039598000 |
| 6 | -3.759141000 | 3.285236000  | -0.231231000 |
| 6 | -4.378442000 | -0.560832000 | -1.502004000 |
| 6 | -4.396378000 | -1.529802000 | -2.514175000 |
| 6 | -5.570210000 | -1.842568000 | -3.184912000 |
| 6 | -6.758762000 | -1.195504000 | -2.856040000 |
| 6 | -6.758745000 | -0.236407000 | -1.848914000 |
| 6 | -5.582622000 | 0.074268000  | -1.175829000 |
| 1 | -4.158825000 | -1.714412000 | 4.889419000  |
| 1 | -5.017819000 | -3.806093000 | 3.973154000  |
| 1 | -5.117059000 | -4.137295000 | 1.497754000  |
| 1 | -4.341747000 | -2.373581000 | -0.001670000 |
| 1 | -1.695424000 | 3.326798000  | 2.507251000  |
| 1 | -1.894995000 | 3.833726000  | 4.895050000  |
| 1 | -2.932325000 | 2.170151000  | 6.440533000  |
| 1 | -3.801192000 | 0.066124000  | 5.563955000  |
| 1 | 2.277523000  | -1.059927000 | -1.681464000 |
| 1 | 2.830976000  | -2.344565000 | -0.610925000 |
| 1 | 3.509684000  | -0.796865000 | 1.121212000  |
| 1 | 2.546373000  | 0.505123000  | 0.447638000  |
| 1 | -3.646351000 | 1.125756000  | -3.249777000 |
| 1 | -3.128980000 | 1.704261000  | -5.581952000 |
| 1 | -0.880119000 | 1.231976000  | -6.530391000 |
| 1 | 0.862839000  | 0.198136000  | -5.086480000 |
| 1 | 0.348078000  | -0.343224000 | -2.729545000 |
| 1 | -0.530950000 | 4.927215000  | 1.034844000  |
| 1 | 0.961437000  | 6.674455000  | 0.119844000  |
| 1 | 2.839979000  | 6.053650000  | -1.380053000 |
| 1 | 3.198962000  | 3.661037000  | -1.979801000 |
| 1 | 1.674386000  | 1.927221000  | -1.106457000 |
| 1 | -0.963346000 | 3.023628000  | -2.138903000 |
| 1 | -2.261737000 | 4.551268000  | -3.554888000 |
| 1 | -4.542811000 | 5.270364000  | -2.872180000 |
| 1 | -5.496650000 | 4.442957000  | -0.730232000 |
| 1 | -4.179667000 | 2.929848000  | 0.708802000  |
| 1 | -3.464929000 | -2.033968000 | -2.770896000 |
| 1 | -5.559474000 | -2.599700000 | -3.965983000 |
| 1 | -7.679813000 | -1.441859000 | -3.379075000 |
| 1 | -7.681635000 | 0.275000000  | -1.583657000 |
| 1 | -5.587818000 | 0.827292000  | -0.388705000 |
| 6 | -0.074082000 | -2.912150000 | -1.099092000 |
| 6 | 0.882808000  | -4.057316000 | -1.447069000 |
| 6 | -1.389087000 | -3.449355000 | -0.529757000 |
| 1 | -0.321696000 | -2.392029000 | -2.042232000 |
| 6 | 0.212129000  | -5.060295000 | -2.384297000 |
| 1 | 1.197558000  | -4.576958000 | -0.529253000 |
| 1 | 1.795998000  | -3.673496000 | -1.920582000 |

|   |              |              |              |
|---|--------------|--------------|--------------|
| 6 | -2.039578000 | -4.447603000 | -1.478669000 |
| 1 | -1.199449000 | -3.953169000 | 0.432120000  |
| 1 | -2.070540000 | -2.614913000 | -0.323383000 |
| 6 | -1.089886000 | -5.593690000 | -1.799934000 |
| 1 | 0.905085000  | -5.882154000 | -2.606042000 |
| 1 | -0.001580000 | -4.564064000 | -3.344704000 |
| 1 | -2.977315000 | -4.819679000 | -1.043189000 |
| 1 | -2.312563000 | -3.934147000 | -2.415109000 |
| 1 | -1.557280000 | -6.305444000 | -2.492171000 |
| 1 | -0.870391000 | -6.152662000 | -0.875386000 |
| 6 | 0.768495000  | -2.088397000 | 1.723133000  |
| 6 | -0.538910000 | -1.996693000 | 2.516865000  |
| 6 | 1.457505000  | -3.432120000 | 1.960061000  |
| 1 | 1.420423000  | -1.295209000 | 2.128817000  |
| 6 | -0.278175000 | -2.205839000 | 4.003214000  |
| 1 | -1.260127000 | -2.752414000 | 2.166591000  |
| 1 | -1.012915000 | -1.021315000 | 2.350100000  |
| 6 | 1.712975000  | -3.641061000 | 3.451503000  |
| 1 | 0.815484000  | -4.248029000 | 1.589231000  |
| 1 | 2.403420000  | -3.495980000 | 1.401784000  |
| 6 | 0.421320000  | -3.535772000 | 4.255985000  |
| 1 | -1.227109000 | -2.154125000 | 4.554806000  |
| 1 | 0.347901000  | -1.379472000 | 4.376242000  |
| 1 | 2.195226000  | -4.613232000 | 3.618049000  |
| 1 | 2.422558000  | -2.874016000 | 3.801527000  |
| 1 | 0.626313000  | -3.670803000 | 5.325701000  |
| 1 | -0.252324000 | -4.356976000 | 3.960362000  |
| 6 | 5.559796000  | 1.082549000  | 0.654986000  |
| 6 | 6.924525000  | 1.614919000  | 0.212782000  |
| 6 | 4.741882000  | 2.207108000  | 1.304293000  |
| 1 | 5.717957000  | 0.291215000  | 1.410026000  |
| 6 | 7.676062000  | 2.278037000  | 1.362239000  |
| 1 | 6.773984000  | 2.346353000  | -0.599736000 |
| 1 | 7.537063000  | 0.806319000  | -0.207234000 |
| 6 | 5.500159000  | 2.869394000  | 2.449894000  |
| 1 | 4.502603000  | 2.966766000  | 0.539341000  |
| 1 | 3.780025000  | 1.828757000  | 1.674626000  |
| 6 | 6.853656000  | 3.394784000  | 1.991079000  |
| 1 | 8.644422000  | 2.657256000  | 1.010361000  |
| 1 | 7.897370000  | 1.517918000  | 2.129263000  |
| 1 | 4.893757000  | 3.676785000  | 2.879388000  |
| 1 | 5.652056000  | 2.131871000  | 3.254602000  |
| 1 | 7.397229000  | 3.851230000  | 2.828400000  |
| 1 | 6.698734000  | 4.191957000  | 1.245889000  |
| 6 | 5.511913000  | -1.224921000 | -1.228483000 |
| 6 | 6.615763000  | -1.008173000 | -2.267146000 |
| 6 | 6.011589000  | -2.087924000 | -0.072496000 |
| 1 | 4.721022000  | -1.796771000 | -1.749450000 |
| 6 | 7.161258000  | -2.341425000 | -2.770611000 |
| 1 | 7.442784000  | -0.432376000 | -1.823102000 |
| 1 | 6.232650000  | -0.403336000 | -3.100312000 |
| 6 | 6.553787000  | -3.421146000 | -0.581477000 |
| 1 | 6.816177000  | -1.556921000 | 0.462334000  |
| 1 | 5.211427000  | -2.260182000 | 0.662253000  |
| 6 | 7.652481000  | -3.207634000 | -1.615902000 |
| 1 | 7.966109000  | -2.174592000 | -3.498173000 |
| 1 | 6.361040000  | -2.876462000 | -3.307721000 |
| 1 | 6.923537000  | -4.028339000 | 0.255086000  |
| 1 | 5.728318000  | -3.990736000 | -1.040434000 |
| 1 | 8.025037000  | -4.170781000 | -1.987723000 |

1 8.507337000 -2.708624000 -1.130808000

Method: M06-2X/6-31G(d,p) Key word: opt freq pop=full  
imaginary frequencies: 0 Energy: -3599.236983 Hartree

**TS II'**

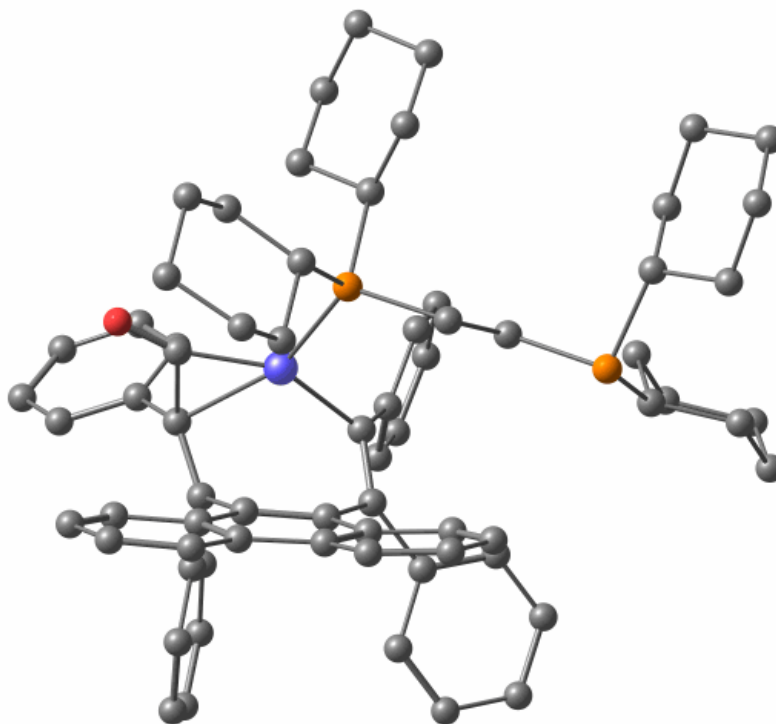

|    |              |              |              |
|----|--------------|--------------|--------------|
| 6  | -3.292685000 | -0.944684000 | -2.169842000 |
| 6  | -2.661000000 | -1.361048000 | -3.369553000 |
| 6  | -1.363943000 | -0.812741000 | -3.713585000 |
| 6  | -0.767007000 | 0.157306000  | -2.864482000 |
| 6  | -1.437175000 | 0.596080000  | -1.660113000 |
| 6  | -2.651443000 | 0.032674000  | -1.324876000 |
| 6  | -0.638231000 | -1.258618000 | -4.837105000 |
| 6  | 0.626954000  | -0.788272000 | -5.111777000 |
| 6  | 1.222187000  | 0.157487000  | -4.266534000 |
| 6  | 0.531826000  | 0.620702000  | -3.170153000 |
| 6  | -4.535945000 | -1.511787000 | -1.812263000 |
| 6  | -5.133768000 | -2.473142000 | -2.594626000 |
| 6  | -4.510219000 | -2.890245000 | -3.777698000 |
| 6  | -3.306346000 | -2.336664000 | -4.155784000 |
| 6  | -0.774646000 | 1.573435000  | -0.731132000 |
| 6  | -0.516136000 | 1.109571000  | 0.518180000  |
| 28 | -1.236098000 | -0.707952000 | 0.754367000  |
| 6  | -2.660773000 | -1.752322000 | 1.021511000  |
| 6  | -3.256037000 | -0.230491000 | 1.067745000  |
| 6  | -3.351618000 | 0.494781000  | -0.078107000 |
| 8  | -3.334388000 | -2.708445000 | 1.242020000  |
| 6  | -3.838070000 | 0.111078000  | 2.377781000  |
| 6  | -4.049775000 | 1.791740000  | -0.206607000 |

|    |              |              |              |
|----|--------------|--------------|--------------|
| 6  | -0.106793000 | 1.931156000  | 1.663847000  |
| 6  | -0.717215000 | 3.169243000  | 1.943018000  |
| 6  | -0.409399000 | 3.881489000  | 3.093859000  |
| 6  | 0.531887000  | 3.396819000  | 3.998742000  |
| 6  | 1.152379000  | 2.178952000  | 3.741447000  |
| 6  | 0.821549000  | 1.453264000  | 2.603023000  |
| 6  | -5.221875000 | 0.093074000  | 2.569351000  |
| 6  | -5.760764000 | 0.414135000  | 3.808525000  |
| 6  | -4.924692000 | 0.748083000  | 4.870227000  |
| 6  | -3.544777000 | 0.751928000  | 4.690569000  |
| 6  | -3.001733000 | 0.424003000  | 3.454054000  |
| 6  | -4.023456000 | 2.757462000  | 0.807693000  |
| 6  | -4.612067000 | 3.999752000  | 0.612707000  |
| 6  | -5.264978000 | 4.290295000  | -0.580932000 |
| 6  | -5.316334000 | 3.332755000  | -1.588493000 |
| 6  | -4.699152000 | 2.102380000  | -1.410164000 |
| 6  | -0.504820000 | 2.931979000  | -1.262216000 |
| 6  | 0.648005000  | 3.643381000  | -0.899731000 |
| 6  | 0.906246000  | 4.905937000  | -1.413859000 |
| 6  | 0.017111000  | 5.494132000  | -2.310214000 |
| 6  | -1.129954000 | 4.802154000  | -2.682463000 |
| 6  | -1.385193000 | 3.535594000  | -2.168822000 |
| 1  | -1.067415000 | -2.007662000 | -5.496729000 |
| 1  | 1.166010000  | -1.161608000 | -5.979236000 |
| 1  | 2.233030000  | 0.511795000  | -4.452766000 |
| 1  | 1.004521000  | 1.342075000  | -2.507490000 |
| 1  | -5.018746000 | -1.184254000 | -0.893678000 |
| 1  | -6.085360000 | -2.904023000 | -2.294197000 |
| 1  | -4.976981000 | -3.647182000 | -4.403180000 |
| 1  | -2.851375000 | -2.671589000 | -5.083577000 |
| 1  | -1.446730000 | 3.567964000  | 1.239950000  |
| 1  | -0.905497000 | 4.831459000  | 3.283472000  |
| 1  | 0.774904000  | 3.960908000  | 4.896119000  |
| 1  | 1.888771000  | 1.781542000  | 4.437861000  |
| 1  | 1.292101000  | 0.487894000  | 2.425691000  |
| 1  | -5.869449000 | -0.162247000 | 1.731173000  |
| 1  | -6.839424000 | 0.404214000  | 3.946807000  |
| 1  | -5.349705000 | 1.002682000  | 5.838259000  |
| 1  | -2.884981000 | 1.017109000  | 5.513570000  |
| 1  | -1.922308000 | 0.450849000  | 3.297270000  |
| 1  | -3.504710000 | 2.547596000  | 1.739672000  |
| 1  | -4.556539000 | 4.746843000  | 1.400837000  |
| 1  | -5.728424000 | 5.263119000  | -0.726928000 |
| 1  | -5.825813000 | 3.549280000  | -2.524384000 |
| 1  | -4.719577000 | 1.368626000  | -2.213760000 |
| 1  | 1.346442000  | 3.191667000  | -0.195662000 |
| 1  | 1.811865000  | 5.433469000  | -1.116499000 |
| 1  | 0.219517000  | 6.482181000  | -2.716920000 |
| 1  | -1.834607000 | 5.249474000  | -3.380493000 |
| 1  | -2.291164000 | 3.006466000  | -2.463912000 |
| 15 | 3.886425000  | 0.329964000  | -1.340144000 |
| 15 | 0.463727000  | -2.053631000 | 0.485312000  |
| 6  | 2.532394000  | -0.215732000 | -0.180301000 |
| 6  | 1.831629000  | -1.483494000 | -0.635877000 |
| 1  | 1.797804000  | 0.600750000  | -0.145412000 |
| 1  | 2.933638000  | -0.328134000 | 0.837224000  |
| 1  | 2.537956000  | -2.322528000 | -0.740635000 |
| 1  | 1.388975000  | -1.322311000 | -1.629147000 |
| 6  | 4.161701000  | 2.065692000  | -0.674995000 |
| 6  | 4.121061000  | 2.328471000  | 0.833204000  |

|   |              |              |              |
|---|--------------|--------------|--------------|
| 6 | 5.397547000  | 2.721486000  | -1.293956000 |
| 1 | 3.283060000  | 2.579513000  | -1.113759000 |
| 6 | 4.131289000  | 3.827557000  | 1.119525000  |
| 1 | 4.997983000  | 1.869920000  | 1.314583000  |
| 1 | 3.235340000  | 1.876277000  | 1.297727000  |
| 6 | 5.424359000  | 4.220204000  | -1.005206000 |
| 1 | 6.306162000  | 2.258787000  | -0.871978000 |
| 1 | 5.427796000  | 2.535416000  | -2.377319000 |
| 6 | 5.347235000  | 4.499195000  | 0.492220000  |
| 1 | 4.102374000  | 4.002901000  | 2.203148000  |
| 1 | 3.208908000  | 4.277992000  | 0.714804000  |
| 1 | 6.326474000  | 4.675131000  | -1.435089000 |
| 1 | 4.565432000  | 4.694021000  | -1.508004000 |
| 1 | 5.334385000  | 5.580415000  | 0.681146000  |
| 1 | 6.258413000  | 4.109216000  | 0.975322000  |
| 6 | 5.284253000  | -0.778071000 | -0.745695000 |
| 6 | 6.452734000  | -0.764251000 | -1.736257000 |
| 6 | 5.806135000  | -0.641743000 | 0.684150000  |
| 1 | 4.812674000  | -1.778751000 | -0.827708000 |
| 6 | 7.469129000  | -1.854879000 | -1.412201000 |
| 1 | 6.951163000  | 0.219032000  | -1.695127000 |
| 1 | 6.076012000  | -0.876018000 | -2.761905000 |
| 6 | 6.803375000  | -1.751244000 | 1.010498000  |
| 1 | 6.315669000  | 0.329165000  | 0.791560000  |
| 1 | 4.981881000  | -0.641986000 | 1.411803000  |
| 6 | 7.966106000  | -1.743944000 | 0.024473000  |
| 1 | 8.311035000  | -1.814040000 | -2.115468000 |
| 1 | 6.992481000  | -2.838668000 | -1.553081000 |
| 1 | 7.169489000  | -1.643991000 | 2.040118000  |
| 1 | 6.289438000  | -2.725813000 | 0.961285000  |
| 1 | 8.671220000  | -2.553605000 | 0.252433000  |
| 1 | 8.525486000  | -0.801328000 | 0.140301000  |
| 6 | 0.096963000  | -3.712522000 | -0.279532000 |
| 6 | -0.692649000 | -4.658471000 | 0.629734000  |
| 6 | -0.643897000 | -3.474597000 | -1.599616000 |
| 1 | 1.075824000  | -4.173947000 | -0.506581000 |
| 6 | -1.072276000 | -5.946491000 | -0.097957000 |
| 1 | -1.609410000 | -4.159303000 | 0.972189000  |
| 1 | -0.108407000 | -4.902459000 | 1.528396000  |
| 6 | -1.015697000 | -4.773109000 | -2.301319000 |
| 1 | -1.569860000 | -2.916693000 | -1.382918000 |
| 1 | -0.049300000 | -2.840236000 | -2.272121000 |
| 6 | -1.843395000 | -5.657517000 | -1.379948000 |
| 1 | -1.659481000 | -6.586481000 | 0.572726000  |
| 1 | -0.158120000 | -6.510301000 | -0.348348000 |
| 1 | -1.565503000 | -4.540799000 | -3.224524000 |
| 1 | -0.100579000 | -5.309212000 | -2.601820000 |
| 1 | -2.122260000 | -6.592952000 | -1.881669000 |
| 1 | -2.782123000 | -5.133978000 | -1.132546000 |
| 6 | 1.342376000  | -2.348370000 | 2.095462000  |
| 6 | 0.372082000  | -2.508409000 | 3.267727000  |
| 6 | 2.408565000  | -3.445270000 | 2.079740000  |
| 1 | 1.874490000  | -1.394786000 | 2.258985000  |
| 6 | 1.128522000  | -2.563515000 | 4.589656000  |
| 1 | -0.220416000 | -3.427152000 | 3.142877000  |
| 1 | -0.350022000 | -1.678469000 | 3.262907000  |
| 6 | 3.150432000  | -3.487494000 | 3.413297000  |
| 1 | 1.938151000  | -4.424864000 | 1.899602000  |
| 1 | 3.120393000  | -3.283064000 | 1.255802000  |
| 6 | 2.183126000  | -3.665539000 | 4.577538000  |



|   |             |              |             |
|---|-------------|--------------|-------------|
| 1 | 0.426493000 | -2.707680000 | 5.420303000 |
| 1 | 1.619938000 | -1.590632000 | 4.760375000 |
| 1 | 3.898462000 | -4.290592000 | 3.402762000 |
| 1 | 3.706492000 | -2.545143000 | 3.546455000 |
| 1 | 2.728985000 | -3.688493000 | 5.529146000 |
| 1 | 1.680864000 | -4.642051000 | 4.480881000 |

Method: M06-2X/6-31G(d,p) Key word: opt freq pop=full  
 imaginary frequencies:  $-59.4549 \text{ cm}^{-1}$  Energy:  $-3599.224711 \text{ Hartree}$

### TS III'

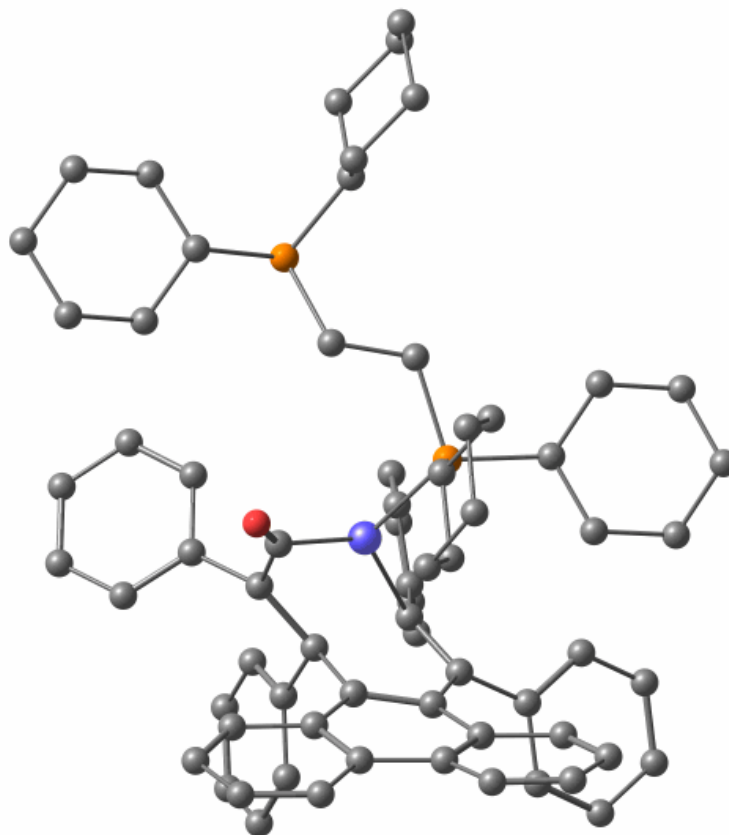

|   |              |              |             |
|---|--------------|--------------|-------------|
| 6 | -2.672225000 | 1.156630000  | 2.621726000 |
| 6 | -3.286824000 | 0.190916000  | 3.465121000 |
| 6 | -3.785276000 | -1.048981000 | 2.897474000 |
| 6 | -3.831740000 | -1.212050000 | 1.486880000 |
| 6 | -3.261760000 | -0.181394000 | 0.652067000 |
| 6 | -2.606596000 | 0.898820000  | 1.207916000 |
| 6 | -4.195353000 | -2.124159000 | 3.711618000 |
| 6 | -4.637665000 | -3.312071000 | 3.173445000 |
| 6 | -4.696617000 | -3.467125000 | 1.783177000 |
| 6 | -4.304492000 | -2.435295000 | 0.960957000 |
| 6 | -2.209550000 | 2.362444000  | 3.193103000 |
| 6 | -2.335518000 | 2.611435000  | 4.539608000 |
| 6 | -2.931455000 | 1.656406000  | 5.373200000 |
| 6 | -3.396056000 | 0.474645000  | 4.840561000 |

|    |              |              |              |
|----|--------------|--------------|--------------|
| 6  | -3.142691000 | -0.199723000 | -0.806843000 |
| 6  | -2.080924000 | 0.535750000  | -1.245316000 |
| 28 | -0.317978000 | 0.335964000  | -0.165763000 |
| 6  | 0.293417000  | 1.203023000  | 1.379995000  |
| 6  | -0.484136000 | 2.140543000  | 0.640346000  |
| 6  | -1.865601000 | 1.753181000  | 0.207958000  |
| 8  | 0.940383000  | 1.012560000  | 2.368752000  |
| 15 | 0.632114000  | -1.619047000 | -0.171674000 |
| 15 | 4.633444000  | 0.299252000  | -0.865893000 |
| 6  | 2.392389000  | -1.446521000 | -0.734759000 |
| 6  | 3.175714000  | -0.410762000 | 0.061698000  |
| 6  | 0.295121000  | 3.328838000  | 0.195279000  |
| 6  | -2.670837000 | 2.884080000  | -0.400207000 |
| 6  | -1.826386000 | 0.952491000  | -2.630834000 |
| 6  | -2.838522000 | 1.497187000  | -3.437223000 |
| 6  | -2.554352000 | 1.972417000  | -4.708673000 |
| 6  | -1.254139000 | 1.916988000  | -5.205650000 |
| 6  | -0.238133000 | 1.378607000  | -4.423013000 |
| 6  | -0.524981000 | 0.901775000  | -3.149110000 |
| 6  | -0.037251000 | 4.614395000  | 0.639836000  |
| 6  | 0.720108000  | 5.714938000  | 0.261202000  |
| 6  | 1.836124000  | 5.554108000  | -0.556139000 |
| 6  | 2.185221000  | 4.282772000  | -0.996366000 |
| 6  | 1.418863000  | 3.182688000  | -0.625963000 |
| 6  | -2.169996000 | 3.685647000  | -1.433693000 |
| 6  | -2.933525000 | 4.711041000  | -1.975376000 |
| 6  | -4.219498000 | 4.956088000  | -1.507216000 |
| 6  | -4.732657000 | 4.163641000  | -0.487690000 |
| 6  | -3.966476000 | 3.141268000  | 0.061293000  |
| 6  | -4.154500000 | -0.807748000 | -1.692186000 |
| 6  | -3.783443000 | -1.585693000 | -2.793500000 |
| 6  | -4.745214000 | -2.140993000 | -3.627587000 |
| 6  | -6.096515000 | -1.914144000 | -3.384456000 |
| 6  | -6.478381000 | -1.127978000 | -2.301219000 |
| 6  | -5.517420000 | -0.582612000 | -1.460043000 |
| 1  | -4.132414000 | -2.033688000 | 4.792570000  |
| 1  | -4.931983000 | -4.128020000 | 3.829116000  |
| 1  | -5.040976000 | -4.403034000 | 1.349127000  |
| 1  | -4.340672000 | -2.576905000 | -0.114892000 |
| 1  | -1.742511000 | 3.100648000  | 2.548484000  |
| 1  | -1.973792000 | 3.549632000  | 4.952740000  |
| 1  | -3.036476000 | 1.848850000  | 6.438145000  |
| 1  | -3.882441000 | -0.237640000 | 5.501049000  |
| 1  | 2.330312000  | -1.154769000 | -1.797603000 |
| 1  | 2.900794000  | -2.420562000 | -0.709109000 |
| 1  | 3.486161000  | -0.822689000 | 1.035411000  |
| 1  | 2.525887000  | 0.445282000  | 0.286449000  |
| 1  | -3.847984000 | 1.578243000  | -3.035649000 |
| 1  | -3.349981000 | 2.404442000  | -5.311427000 |
| 1  | -1.033621000 | 2.297399000  | -6.200419000 |
| 1  | 0.780574000  | 1.334531000  | -4.801148000 |
| 1  | 0.271748000  | 0.493630000  | -2.521070000 |
| 1  | -0.915737000 | 4.753231000  | 1.267634000  |
| 1  | 0.438466000  | 6.706040000  | 0.609672000  |
| 1  | 2.428041000  | 6.418038000  | -0.849168000 |
| 1  | 3.052476000  | 4.137776000  | -1.638235000 |
| 1  | 1.680821000  | 2.187814000  | -0.989922000 |
| 1  | -1.178746000 | 3.499428000  | -1.838642000 |
| 1  | -2.518266000 | 5.310710000  | -2.782006000 |
| 1  | -4.817132000 | 5.757872000  | -1.934550000 |

|   |              |              |              |
|---|--------------|--------------|--------------|
| 1 | -5.735208000 | 4.342439000  | -0.105606000 |
| 1 | -4.380700000 | 2.538988000  | 0.866815000  |
| 1 | -2.724675000 | -1.755857000 | -2.984665000 |
| 1 | -4.436464000 | -2.754506000 | -4.471363000 |
| 1 | -6.849867000 | -2.347768000 | -4.037734000 |
| 1 | -7.532181000 | -0.939704000 | -2.108875000 |
| 1 | -5.816088000 | 0.027991000  | -0.608836000 |
| 6 | -0.011115000 | -2.975188000 | -1.288365000 |
| 6 | 0.928166000  | -4.142117000 | -1.606967000 |
| 6 | -1.363903000 | -3.483304000 | -0.787658000 |
| 1 | -0.192326000 | -2.424607000 | -2.233206000 |
| 6 | 0.274817000  | -5.128369000 | -2.572981000 |
| 1 | 1.191005000  | -4.670139000 | -0.677534000 |
| 1 | 1.869814000  | -3.777340000 | -2.037133000 |
| 6 | -1.997795000 | -4.472838000 | -1.757060000 |
| 1 | -1.226324000 | -3.988295000 | 0.182108000  |
| 1 | -2.033675000 | -2.633116000 | -0.599987000 |
| 6 | -1.057428000 | -5.637659000 | -2.037170000 |
| 1 | 0.959002000  | -5.962879000 | -2.773690000 |
| 1 | 0.104525000  | -4.625009000 | -3.538632000 |
| 1 | -2.958552000 | -4.824026000 | -1.354969000 |
| 1 | -2.229320000 | -3.962731000 | -2.705946000 |
| 1 | -1.512064000 | -6.343267000 | -2.744137000 |
| 1 | -0.882580000 | -6.197207000 | -1.103608000 |
| 6 | 0.801603000  | -2.225315000 | 1.580098000  |
| 6 | -0.513948000 | -2.195473000 | 2.365870000  |
| 6 | 1.542615000  | -3.541322000 | 1.814325000  |
| 1 | 1.417765000  | -1.411350000 | 2.003350000  |
| 6 | -0.252264000 | -2.397894000 | 3.853895000  |
| 1 | -1.196651000 | -2.985359000 | 2.011667000  |
| 1 | -1.035439000 | -1.243370000 | 2.200077000  |
| 6 | 1.807066000  | -3.738910000 | 3.305773000  |
| 1 | 0.931683000  | -4.382269000 | 1.446309000  |
| 1 | 2.489511000  | -3.570129000 | 1.254104000  |
| 6 | 0.511079000  | -3.692462000 | 4.108565000  |
| 1 | -1.205445000 | -2.394927000 | 4.401015000  |
| 1 | 0.329945000  | -1.542969000 | 4.233299000  |
| 1 | 2.332399000  | -4.688157000 | 3.474614000  |
| 1 | 2.480753000  | -2.939813000 | 3.655231000  |
| 1 | 0.720648000  | -3.815263000 | 5.178980000  |
| 1 | -0.121645000 | -4.546206000 | 3.814376000  |
| 6 | 5.483411000  | 1.155913000  | 0.573873000  |
| 6 | 6.861749000  | 1.682401000  | 0.167416000  |
| 6 | 4.597418000  | 2.304594000  | 1.069126000  |
| 1 | 5.611087000  | 0.438222000  | 1.404455000  |
| 6 | 7.518817000  | 2.491746000  | 1.281137000  |
| 1 | 6.750101000  | 2.314668000  | -0.730520000 |
| 1 | 7.519046000  | 0.850335000  | -0.119372000 |
| 6 | 5.266220000  | 3.111416000  | 2.176626000  |
| 1 | 4.372134000  | 2.975512000  | 0.222141000  |
| 1 | 3.631210000  | 1.924731000  | 1.426918000  |
| 6 | 6.625179000  | 3.637156000  | 1.735129000  |
| 1 | 8.495131000  | 2.866833000  | 0.946930000  |
| 1 | 7.716145000  | 1.826762000  | 2.137867000  |
| 1 | 4.608670000  | 3.935542000  | 2.481584000  |
| 1 | 5.396787000  | 2.471153000  | 3.064004000  |
| 1 | 7.104797000  | 4.203417000  | 2.544030000  |
| 1 | 6.486612000  | 4.340871000  | 0.898282000  |
| 6 | 5.639023000  | -1.262348000 | -1.154052000 |
| 6 | 6.747006000  | -1.043431000 | -2.188689000 |

|   |             |              |              |
|---|-------------|--------------|--------------|
| 6 | 6.171338000 | -1.977788000 | 0.085685000  |
| 1 | 4.902067000 | -1.933286000 | -1.634115000 |
| 6 | 7.437819000 | -2.355498000 | -2.546679000 |
| 1 | 7.498020000 | -0.341703000 | -1.792773000 |
| 1 | 6.327976000 | -0.566691000 | -3.085246000 |
| 6 | 6.866242000 | -3.285663000 | -0.283711000 |
| 1 | 6.892377000 | -1.324232000 | 0.603635000  |
| 1 | 5.357978000 | -2.169013000 | 0.801198000  |
| 6 | 7.975892000 | -3.051025000 | -1.301398000 |
| 1 | 8.244315000 | -2.177235000 | -3.269769000 |
| 1 | 6.712954000 | -3.019834000 | -3.045013000 |
| 1 | 7.263701000 | -3.772718000 | 0.616435000  |
| 1 | 6.123968000 | -3.979304000 | -0.711973000 |
| 1 | 8.461711000 | -3.998701000 | -1.567185000 |
| 1 | 8.754203000 | -2.418092000 | -0.844349000 |

Method: M06-2X/6-31G(d,p) Key word: opt freq pop=full  
 imaginary frequencies:  $-209.3214 \text{ cm}^{-1}$  Energy:  $-3599.219381 \text{ Hartree}$

#### Int IV'

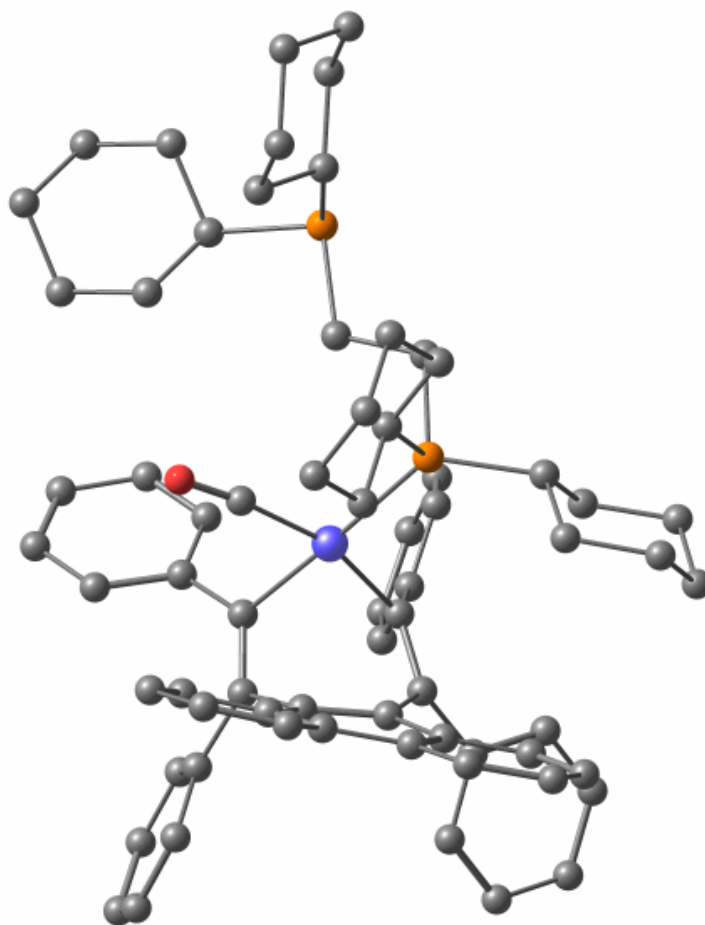

|   |             |              |              |
|---|-------------|--------------|--------------|
| 6 | 2.445711000 | -0.426299000 | -2.749750000 |
|---|-------------|--------------|--------------|

|    |              |              |              |
|----|--------------|--------------|--------------|
| 6  | 2.871657000  | -1.770397000 | -2.902150000 |
| 6  | 3.503972000  | -2.440545000 | -1.784077000 |
| 6  | 3.597929000  | -1.773424000 | -0.533031000 |
| 6  | 3.056070000  | -0.439588000 | -0.376103000 |
| 6  | 2.592626000  | 0.244920000  | -1.478869000 |
| 6  | 4.002644000  | -3.755134000 | -1.888817000 |
| 6  | 4.590313000  | -4.394052000 | -0.820086000 |
| 6  | 4.700831000  | -3.731280000 | 0.408852000  |
| 6  | 4.204059000  | -2.454893000 | 0.547494000  |
| 6  | 1.786431000  | 0.208036000  | -3.827323000 |
| 6  | 1.555485000  | -0.448700000 | -5.014635000 |
| 6  | 1.989786000  | -1.771843000 | -5.170998000 |
| 6  | 2.631886000  | -2.413114000 | -4.133930000 |
| 6  | 2.882873000  | 0.172777000  | 0.970739000  |
| 6  | 1.629587000  | 0.581425000  | 1.289202000  |
| 28 | 0.226184000  | 0.235943000  | -0.011798000 |
| 6  | -0.834831000 | 0.355477000  | -1.459231000 |
| 6  | 0.964706000  | 1.876166000  | -0.743166000 |
| 6  | 2.144050000  | 1.671008000  | -1.362112000 |
| 8  | -1.428827000 | 0.526680000  | -2.427170000 |
| 6  | 0.139128000  | 3.088663000  | -0.710689000 |
| 6  | 3.100735000  | 2.719623000  | -1.787595000 |
| 6  | 1.307541000  | 1.478629000  | 2.408893000  |
| 6  | 2.043303000  | 2.662491000  | 2.587990000  |
| 6  | 1.672691000  | 3.597728000  | 3.543848000  |
| 6  | 0.564855000  | 3.373221000  | 4.357809000  |
| 6  | -0.173077000 | 2.204574000  | 4.199485000  |
| 6  | 0.189112000  | 1.277406000  | 3.229012000  |
| 6  | -0.042090000 | 3.835547000  | -1.887245000 |
| 6  | -0.890081000 | 4.933717000  | -1.915703000 |
| 6  | -1.585422000 | 5.313307000  | -0.770781000 |
| 6  | -1.438194000 | 4.568813000  | 0.395637000  |
| 6  | -0.597051000 | 3.462727000  | 0.424005000  |
| 6  | 3.153144000  | 3.947028000  | -1.106842000 |
| 6  | 4.082773000  | 4.917700000  | -1.449191000 |
| 6  | 4.998731000  | 4.687372000  | -2.471865000 |
| 6  | 4.977741000  | 3.468752000  | -3.139735000 |
| 6  | 4.046391000  | 2.495239000  | -2.798347000 |
| 6  | 4.079718000  | 0.377501000  | 1.819221000  |
| 6  | 4.060442000  | 0.137774000  | 3.200483000  |
| 6  | 5.200269000  | 0.323141000  | 3.971548000  |
| 6  | 6.387045000  | 0.748171000  | 3.380300000  |
| 6  | 6.422553000  | 0.982549000  | 2.009625000  |
| 6  | 5.283437000  | 0.793855000  | 1.236824000  |
| 1  | 3.940736000  | -4.280213000 | -2.838164000 |
| 1  | 4.975590000  | -5.404347000 | -0.936066000 |
| 1  | 5.171976000  | -4.223244000 | 1.257520000  |
| 1  | 4.286879000  | -1.954460000 | 1.507939000  |
| 1  | 1.436951000  | 1.230191000  | -3.693961000 |
| 1  | 1.036283000  | 0.057562000  | -5.824630000 |
| 1  | 1.814480000  | -2.297441000 | -6.106831000 |
| 1  | 2.943166000  | -3.444522000 | -4.276090000 |
| 1  | 2.900269000  | 2.844878000  | 1.941133000  |
| 1  | 2.250478000  | 4.513023000  | 3.651850000  |
| 1  | 0.275035000  | 4.107716000  | 5.105429000  |
| 1  | -1.044301000 | 2.018735000  | 4.824302000  |
| 1  | -0.417729000 | 0.386927000  | 3.078527000  |
| 1  | 0.499183000  | 3.539123000  | -2.784897000 |
| 1  | -1.009999000 | 5.496232000  | -2.839089000 |
| 1  | -2.249243000 | 6.174960000  | -0.792193000 |

|    |              |              |              |
|----|--------------|--------------|--------------|
| 1  | -1.986165000 | 4.846878000  | 1.294475000  |
| 1  | -0.492014000 | 2.889226000  | 1.341951000  |
| 1  | 2.459947000  | 4.127360000  | -0.287547000 |
| 1  | 4.101807000  | 5.857107000  | -0.900962000 |
| 1  | 5.730878000  | 5.447066000  | -2.735195000 |
| 1  | 5.695268000  | 3.268142000  | -3.932410000 |
| 1  | 4.052567000  | 1.546730000  | -3.330129000 |
| 1  | 3.135377000  | -0.203104000 | 3.666261000  |
| 1  | 5.163965000  | 0.127619000  | 5.041150000  |
| 1  | 7.279914000  | 0.890381000  | 3.984541000  |
| 1  | 7.344578000  | 1.314022000  | 1.536912000  |
| 1  | 5.315792000  | 0.973448000  | 0.162459000  |
| 15 | -4.611824000 | 0.376044000  | 1.715614000  |
| 15 | -0.710080000 | -1.699378000 | 0.780743000  |
| 6  | -2.899194000 | 0.018619000  | 1.078411000  |
| 6  | -2.254361000 | -1.218040000 | 1.690583000  |
| 1  | -2.279070000 | 0.902348000  | 1.291395000  |
| 1  | -2.938617000 | -0.069591000 | -0.014868000 |
| 1  | -2.937522000 | -2.079895000 | 1.687727000  |
| 1  | -2.000500000 | -1.037319000 | 2.743577000  |
| 6  | -4.959933000 | 1.976111000  | 0.775687000  |
| 6  | -4.331426000 | 2.198151000  | -0.604188000 |
| 6  | -6.468131000 | 2.244266000  | 0.738508000  |
| 1  | -4.512537000 | 2.730977000  | 1.451364000  |
| 6  | -4.681908000 | 3.580467000  | -1.151686000 |
| 1  | -4.682445000 | 1.428139000  | -1.309197000 |
| 1  | -3.235910000 | 2.112925000  | -0.559028000 |
| 6  | -6.791173000 | 3.629350000  | 0.188847000  |
| 1  | -6.947475000 | 1.494576000  | 0.086944000  |
| 1  | -6.903771000 | 2.109869000  | 1.739641000  |
| 6  | -6.185354000 | 3.812186000  | -1.195989000 |
| 1  | -4.227600000 | 3.712179000  | -2.142740000 |
| 1  | -4.218100000 | 4.341689000  | -0.503339000 |
| 1  | -7.878149000 | 3.781309000  | 0.164192000  |
| 1  | -6.381956000 | 4.394156000  | 0.868293000  |
| 1  | -6.411064000 | 4.811730000  | -1.589343000 |
| 1  | -6.646650000 | 3.090418000  | -1.890449000 |
| 6  | -5.538399000 | -1.024319000 | 0.857926000  |
| 6  | -6.971272000 | -1.153590000 | 1.386672000  |
| 6  | -5.511767000 | -1.138495000 | -0.666263000 |
| 1  | -4.993384000 | -1.905688000 | 1.251692000  |
| 6  | -7.620766000 | -2.451722000 | 0.918206000  |
| 1  | -7.574561000 | -0.304030000 | 1.029927000  |
| 1  | -6.970520000 | -1.092056000 | 2.483469000  |
| 6  | -6.158437000 | -2.444593000 | -1.123497000 |
| 1  | -6.064296000 | -0.294048000 | -1.110551000 |
| 1  | -4.481629000 | -1.073771000 | -1.051576000 |
| 6  | -7.584647000 | -2.566998000 | -0.600718000 |
| 1  | -8.652914000 | -2.515982000 | 1.286176000  |
| 1  | -7.078736000 | -3.304959000 | 1.357786000  |
| 1  | -6.137843000 | -2.516290000 | -2.219388000 |
| 1  | -5.560370000 | -3.292354000 | -0.745331000 |
| 1  | -8.034467000 | -3.512879000 | -0.928585000 |
| 1  | -8.196818000 | -1.761593000 | -1.038331000 |
| 6  | 0.032450000  | -2.974204000 | 1.920600000  |
| 6  | 1.043533000  | -3.878445000 | 1.212185000  |
| 6  | 0.683170000  | -2.284756000 | 3.123574000  |
| 1  | -0.810554000 | -3.594835000 | 2.279702000  |
| 6  | 1.701247000  | -4.860579000 | 2.176798000  |
| 1  | 1.819087000  | -3.251362000 | 0.744078000  |

|   |              |              |              |
|---|--------------|--------------|--------------|
| 1 | 0.561243000  | -4.438994000 | 0.401021000  |
| 6 | 1.314825000  | -3.286958000 | 4.081495000  |
| 1 | 1.458821000  | -1.598715000 | 2.745632000  |
| 1 | -0.047418000 | -1.665345000 | 3.661580000  |
| 6 | 2.340368000  | -4.151082000 | 3.362196000  |
| 1 | 2.445679000  | -5.457036000 | 1.633314000  |
| 1 | 0.940385000  | -5.567719000 | 2.547242000  |
| 1 | 1.777228000  | -2.752508000 | 4.921743000  |
| 1 | 0.530375000  | -3.931099000 | 4.511799000  |
| 1 | 2.787498000  | -4.878604000 | 4.051613000  |
| 1 | 3.161119000  | -3.509139000 | 3.001480000  |
| 6 | -1.414747000 | -2.626639000 | -0.678102000 |
| 6 | -0.381512000 | -2.857091000 | -1.788301000 |
| 6 | -2.199682000 | -3.904791000 | -0.381207000 |
| 1 | -2.146367000 | -1.896220000 | -1.074101000 |
| 6 | -1.050779000 | -3.384156000 | -3.051350000 |
| 1 | 0.379866000  | -3.578192000 | -1.452590000 |
| 1 | 0.166696000  | -1.929365000 | -2.007713000 |
| 6 | -2.862061000 | -4.425103000 | -1.655487000 |
| 1 | -1.525210000 | -4.678184000 | 0.019292000  |
| 1 | -2.966413000 | -3.726215000 | 0.387642000  |
| 6 | -1.840282000 | -4.655737000 | -2.762610000 |
| 1 | -0.293152000 | -3.556924000 | -3.826468000 |
| 1 | -1.729935000 | -2.609729000 | -3.445229000 |
| 1 | -3.420762000 | -5.345611000 | -1.440901000 |
| 1 | -3.603412000 | -3.683403000 | -1.998797000 |
| 1 | -2.336829000 | -5.019065000 | -3.671154000 |
| 1 | -1.142146000 | -5.448930000 | -2.448458000 |

---

Method: M06-2X/6-31G(d,p) Key word: opt freq pop=full  
imaginary frequencies: 0 Energy: -3599.232579 Hartree

---

**Int V'**

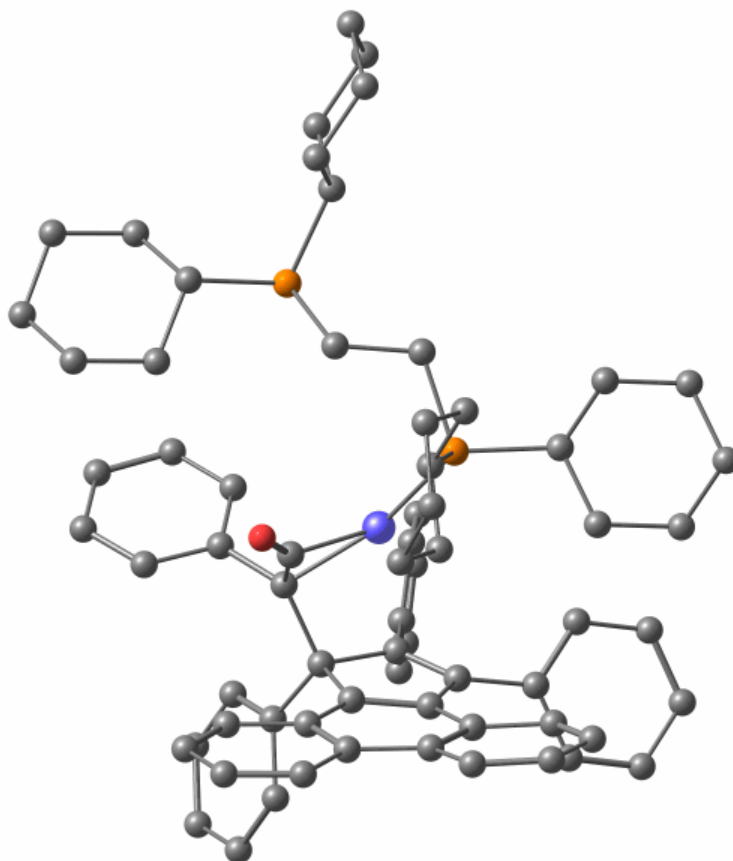

|    |              |              |              |
|----|--------------|--------------|--------------|
| 6  | 2.799525000  | -1.248780000 | 2.435204000  |
| 6  | 3.396355000  | -0.252777000 | 3.255608000  |
| 6  | 3.886980000  | 0.975304000  | 2.653036000  |
| 6  | 3.873692000  | 1.134164000  | 1.237271000  |
| 6  | 3.323833000  | 0.069698000  | 0.438766000  |
| 6  | 2.740802000  | -1.026082000 | 1.026851000  |
| 6  | 4.343777000  | 2.053348000  | 3.438648000  |
| 6  | 4.759600000  | 3.238940000  | 2.874048000  |
| 6  | 4.739202000  | 3.394051000  | 1.482760000  |
| 6  | 4.307173000  | 2.359106000  | 0.684052000  |
| 6  | 2.307462000  | -2.432338000 | 3.025417000  |
| 6  | 2.392325000  | -2.636294000 | 4.382106000  |
| 6  | 2.979520000  | -1.657968000 | 5.196801000  |
| 6  | 3.469436000  | -0.496344000 | 4.641541000  |
| 6  | 3.118355000  | -0.012305000 | -1.016510000 |
| 6  | 2.330451000  | -1.085925000 | -1.290660000 |
| 28 | 0.139276000  | -0.005653000 | -0.274673000 |
| 6  | -0.013306000 | -0.996316000 | 1.273011000  |
| 6  | 0.503812000  | -1.861725000 | 0.280727000  |
| 6  | 2.036499000  | -1.888907000 | -0.007965000 |
| 8  | -0.516717000 | -0.828033000 | 2.345587000  |
| 15 | -0.689939000 | 2.023563000  | -0.090075000 |
| 15 | -4.384465000 | -0.219721000 | -0.712639000 |
| 6  | -2.490629000 | 1.895362000  | -0.512350000 |
| 6  | -3.140432000 | 0.754426000  | 0.271537000  |
| 6  | -0.488692000 | -2.942028000 | -0.044226000 |
| 6  | 2.682826000  | -3.266771000 | -0.191435000 |



|   |              |              |              |
|---|--------------|--------------|--------------|
| 6 | 1.945479000  | -1.516734000 | -2.648983000 |
| 6 | 2.801894000  | -2.320827000 | -3.407843000 |
| 6 | 2.455186000  | -2.701098000 | -4.698561000 |
| 6 | 1.249534000  | -2.282509000 | -5.253106000 |
| 6 | 0.394090000  | -1.471943000 | -4.514600000 |
| 6 | 0.746098000  | -1.089202000 | -3.225420000 |
| 6 | -0.669966000 | -3.995239000 | 0.863210000  |
| 6 | -1.591580000 | -5.005405000 | 0.616954000  |
| 6 | -2.368913000 | -4.974952000 | -0.538018000 |
| 6 | -2.230912000 | -3.916625000 | -1.429859000 |
| 6 | -1.305207000 | -2.908079000 | -1.179726000 |
| 6 | 2.090473000  | -4.258278000 | -0.982541000 |
| 6 | 2.746610000  | -5.457023000 | -1.238913000 |
| 6 | 4.018632000  | -5.687656000 | -0.729480000 |
| 6 | 4.630424000  | -4.703330000 | 0.037264000  |
| 6 | 3.969972000  | -3.509404000 | 0.302459000  |
| 6 | 3.746553000  | 0.830650000  | -2.052990000 |
| 6 | 2.986974000  | 1.534386000  | -2.990999000 |
| 6 | 3.605407000  | 2.290389000  | -3.981374000 |
| 6 | 4.992315000  | 2.355736000  | -4.048749000 |
| 6 | 5.759801000  | 1.650272000  | -3.126103000 |
| 6 | 5.142734000  | 0.891769000  | -2.140136000 |
| 1 | 4.350154000  | 1.965062000  | 4.521658000  |
| 1 | 5.094951000  | 4.053527000  | 3.511514000  |
| 1 | 5.056628000  | 4.330795000  | 1.030080000  |
| 1 | 4.281103000  | 2.499156000  | -0.392519000 |
| 1 | 1.871565000  | -3.191768000 | 2.381420000  |
| 1 | 2.010761000  | -3.555284000 | 4.819951000  |
| 1 | 3.054846000  | -1.816318000 | 6.269857000  |
| 1 | 3.932997000  | 0.235330000  | 5.297344000  |
| 1 | -2.515584000 | 1.695334000  | -1.596575000 |
| 1 | -3.027237000 | 2.841209000  | -0.350328000 |
| 1 | -3.564982000 | 1.123667000  | 1.218592000  |
| 1 | -2.371805000 | 0.017782000  | 0.542246000  |
| 1 | 3.745647000  | -2.647106000 | -2.972239000 |
| 1 | 3.131898000  | -3.326840000 | -5.275660000 |
| 1 | 0.980149000  | -2.581841000 | -6.263299000 |
| 1 | -0.546075000 | -1.131384000 | -4.942499000 |
| 1 | 0.081822000  | -0.437087000 | -2.646430000 |
| 1 | -0.079374000 | -4.009529000 | 1.778509000  |
| 1 | -1.710844000 | -5.815077000 | 1.333786000  |
| 1 | -3.091330000 | -5.765149000 | -0.731880000 |
| 1 | -2.856979000 | -3.861744000 | -2.317731000 |
| 1 | -1.213352000 | -2.077249000 | -1.874630000 |
| 1 | 1.114103000  | -4.093099000 | -1.428511000 |
| 1 | 2.257760000  | -6.209532000 | -1.853282000 |
| 1 | 4.531327000  | -6.625068000 | -0.932803000 |
| 1 | 5.628877000  | -4.862208000 | 0.438605000  |
| 1 | 4.468607000  | -2.752364000 | 0.903277000  |
| 1 | 1.900066000  | 1.487714000  | -2.933733000 |
| 1 | 2.997296000  | 2.832217000  | -4.702931000 |
| 1 | 5.475169000  | 2.950090000  | -4.820654000 |
| 1 | 6.845403000  | 1.688568000  | -3.177072000 |
| 1 | 5.741679000  | 0.342537000  | -1.414777000 |
| 6 | -0.086869000 | 3.448065000  | -1.128687000 |
| 6 | -0.927188000 | 4.725121000  | -1.167027000 |
| 6 | 1.373385000  | 3.769975000  | -0.807575000 |
| 1 | -0.108629000 | 3.004909000  | -2.145028000 |
| 6 | -0.338334000 | 5.729499000  | -2.155791000 |
| 1 | -0.951110000 | 5.179120000  | -0.164735000 |

|   |              |              |              |
|---|--------------|--------------|--------------|
| 1 | -1.968415000 | 4.500559000  | -1.434210000 |
| 6 | 1.953481000  | 4.769181000  | -1.798880000 |
| 1 | 1.437788000  | 4.198406000  | 0.205780000  |
| 1 | 1.969277000  | 2.845974000  | -0.787182000 |
| 6 | 1.119016000  | 6.043893000  | -1.834422000 |
| 1 | -0.940160000 | 6.647460000  | -2.162557000 |
| 1 | -0.400132000 | 5.308798000  | -3.172642000 |
| 1 | 3.000698000  | 4.986743000  | -1.545059000 |
| 1 | 1.970283000  | 4.314489000  | -2.802570000 |
| 1 | 1.527133000  | 6.755469000  | -2.563529000 |
| 1 | 1.172359000  | 6.538158000  | -0.850754000 |
| 6 | -0.700325000 | 2.448910000  | 1.720477000  |
| 6 | 0.689570000  | 2.367544000  | 2.356832000  |
| 6 | -1.429241000 | 3.711066000  | 2.175908000  |
| 1 | -1.255310000 | 1.576425000  | 2.111723000  |
| 6 | 0.580609000  | 2.379683000  | 3.876826000  |
| 1 | 1.310416000  | 3.220312000  | 2.036854000  |
| 1 | 1.203209000  | 1.459796000  | 2.014020000  |
| 6 | -1.553030000 | 3.717033000  | 3.698491000  |
| 1 | -0.859442000 | 4.601304000  | 1.862130000  |
| 1 | -2.422466000 | 3.790120000  | 1.709083000  |
| 6 | -0.183961000 | 3.606724000  | 4.362929000  |
| 1 | 1.586086000  | 2.351615000  | 4.321228000  |
| 1 | 0.066387000  | 1.461028000  | 4.200809000  |
| 1 | -2.072413000 | 4.624127000  | 4.034594000  |
| 1 | -2.178634000 | 2.863655000  | 4.006382000  |
| 1 | -0.290762000 | 3.588634000  | 5.455222000  |
| 1 | 0.400271000  | 4.510324000  | 4.121835000  |
| 6 | -5.089322000 | -1.285388000 | 0.661781000  |
| 6 | -6.128192000 | -2.248405000 | 0.079233000  |
| 6 | -3.971526000 | -2.074645000 | 1.352917000  |
| 1 | -5.576629000 | -0.642893000 | 1.416471000  |
| 6 | -6.668260000 | -3.221379000 | 1.121473000  |
| 1 | -5.651619000 | -2.818932000 | -0.736767000 |
| 1 | -6.956525000 | -1.689454000 | -0.378610000 |
| 6 | -4.519347000 | -3.048476000 | 2.390403000  |
| 1 | -3.414255000 | -2.639698000 | 0.587838000  |
| 1 | -3.247799000 | -1.404405000 | 1.834527000  |
| 6 | -5.536462000 | -4.001348000 | 1.778017000  |
| 1 | -7.396365000 | -3.901987000 | 0.660665000  |
| 1 | -7.213877000 | -2.657016000 | 1.895336000  |
| 1 | -3.688329000 | -3.603713000 | 2.845325000  |
| 1 | -5.000493000 | -2.481448000 | 3.204432000  |
| 1 | -5.929843000 | -4.692527000 | 2.534983000  |
| 1 | -5.032250000 | -4.618720000 | 1.015808000  |
| 6 | -5.675201000 | 1.123809000  | -0.988287000 |
| 6 | -6.729304000 | 0.727059000  | -2.024958000 |
| 6 | -6.342231000 | 1.718971000  | 0.249468000  |
| 1 | -5.067323000 | 1.923370000  | -1.453796000 |
| 6 | -7.605422000 | 1.918958000  | -2.398249000 |
| 1 | -7.370836000 | -0.069658000 | -1.613379000 |
| 1 | -6.244116000 | 0.303693000  | -2.914968000 |
| 6 | -7.216706000 | 2.914221000  | -0.120490000 |
| 1 | -6.973422000 | 0.951375000  | 0.727267000  |
| 1 | -5.591393000 | 2.016036000  | 0.996670000  |
| 6 | -8.259655000 | 2.531291000  | -1.164811000 |
| 1 | -8.367454000 | 1.619564000  | -3.129651000 |
| 1 | -6.981276000 | 2.681472000  | -2.892197000 |
| 1 | -7.700588000 | 3.325962000  | 0.774997000  |
| 1 | -6.575471000 | 3.714553000  | -0.525222000 |

|   |              |             |              |
|---|--------------|-------------|--------------|
| 1 | -8.865246000 | 3.403814000 | -1.442376000 |
| 1 | -8.954423000 | 1.797162000 | -0.724992000 |

-----  
Method: M06-2X/6-31G(d,p) Key word: opt freq pop=full  
imaginary frequencies: 0 Energy: -3599.241111 Hartree  
-----

## XI. Reference.

1. M. J. Frisch, G. W. Trucks, H. B. Schlegel, G. E. Scuseria, M. A. Robb, J. R. Cheeseman, G. Scalmani, V. Barone, B. Mennucci, G. A. Petersson, H. Nakatsuji, M. Caricato, X. Li, H. P. Hratchian, A. F. Izmaylov, J. Bloino, G. Zheng, J. L. Sonnenberg, M. Hada, M. Ehara, K. Toyota, R. Fukuda, J. Hasegawa, M. Ishida, T. Nakajima, Y. Honda, O. Kitao, H. Nakai, T. Vreven, J. A. Montgomery, Jr., J. E. Peralta, F. Ogliaro, M. Bearpark, J. J. Heyd, E. Brothers, K. N. Kudin, V. N. Staroverov, T. Keith, R. Kobayashi, J. Normand, K. Raghavachari, A. Rendell, J. C. Burant, S. S. Iyengar, J. Tomasi, M. Cossi, N. Rega, J. M. Millam, M. Klene, J. E. Knox, J. B. Cross, V. Bakken, C. Adamo, J. Jaramillo, R. Gomperts, R. E. Stratmann, O. Yazyev, A. J. Austin, R. Cammi, C. Pomelli, J. W. Ochterski, R. L. Martin, K. Morokuma, V. G. Zakrzewski, G. A. Voth, P. Salvador, J. J. Dannenberg, S. Dapprich, A. D. Daniels, O. Farkas, J. B. Foresman, J. V. Ortiz, J. Cioslowski and D. J. Fox, Gaussian, Inc., Wallingford CT, 2013.
2. Y. Zhao and D. G. Truhlar, *Theor. Chem. Acc.*, 2008, **120**, 215–241.
3. H. Kinuta, M. Tobisu and N. Chatani, *J. Am. Chem. Soc.*, 2015, **137**, 1593–1600.
4. R. M. Pike and R. R. Luongo, *J. Am. Chem. Soc.*, 1965, **87**, 1404–1405.
5. D. L. Crossley, C. D. Gabbutt, B. M. Heron, P. Kay and M. Mogstad, *Dyes Pigm.*, 2012, **96**, 62–68.
6. X. Yang, Q. Miao, *Synlett*, 2016, **27**, 2091–2094.
7. T. Kodama, Y. Kawashima, K. Uchida, Z. Deng and M. Tobisu, *J. Org. Chem.*, 2021, **86**, 13800–13807.
8. T. Kodama, Y. Kawashima, Z. Deng and Tobisu, M. *Inorg. Chem.*, 2021, **60**, 4332–4336.
9. K. Muto, J. Yamaguchi, A. Lei and K. Itami, *J. Am. Chem. Soc.*, 2013, **135**, 16384–16387.
10. K. Amaike, K. Muto, J. Yamaguchi and Itami, K., *J. Am. Chem. Soc.*, 2012, **134**, 13573–13576.

## XII. Copies of NMR spectra.

<sup>1</sup>H NMR spectrum (400 MHz, CDCl<sub>3</sub>) of **S1f**

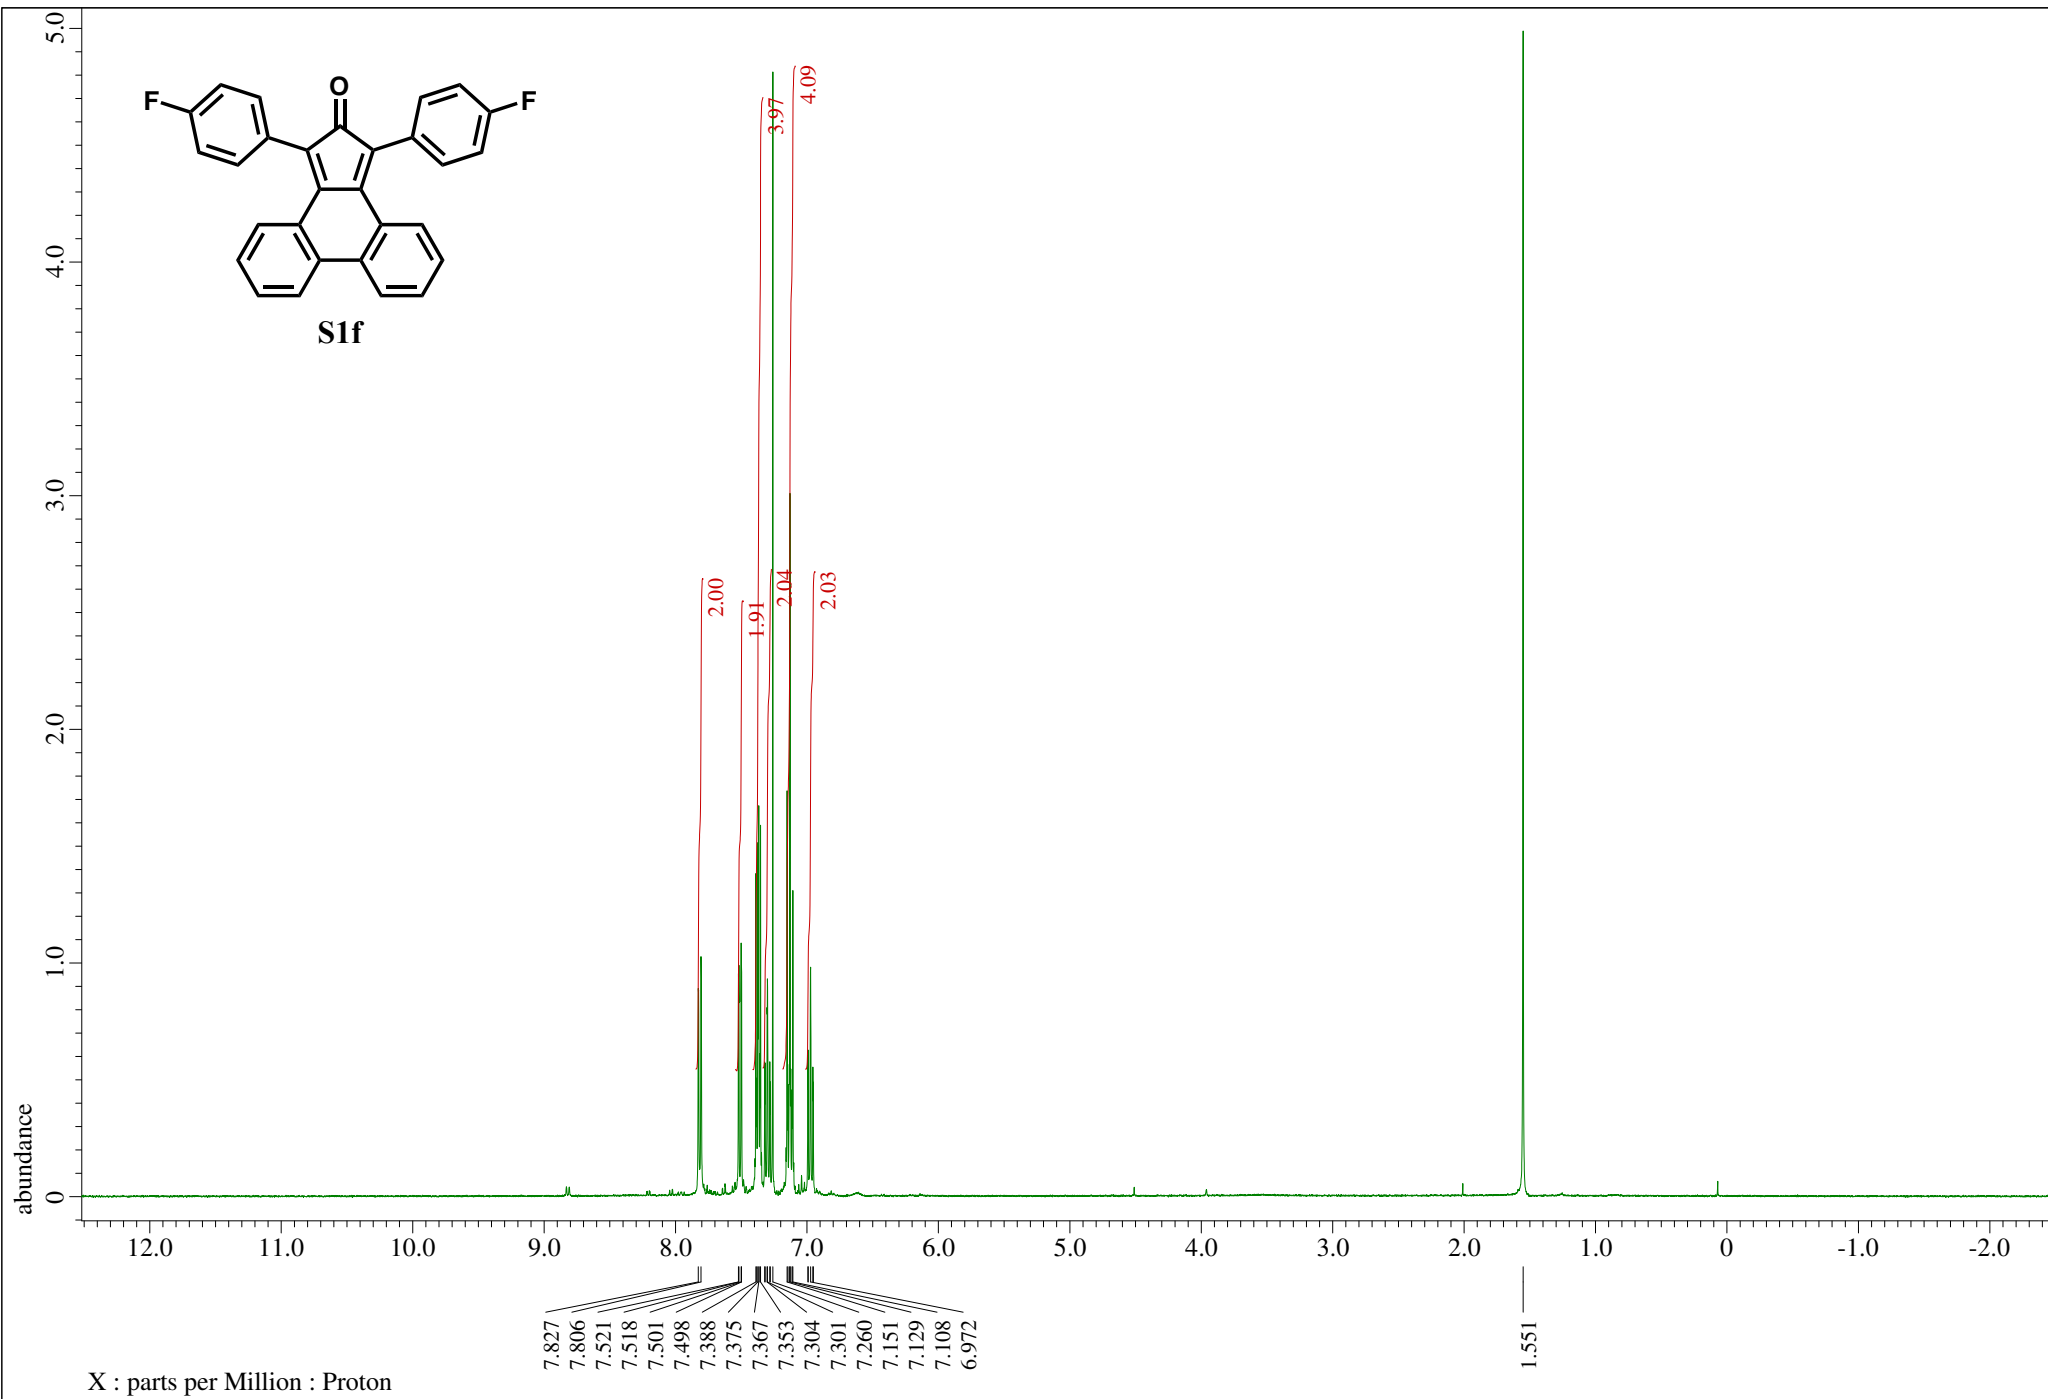

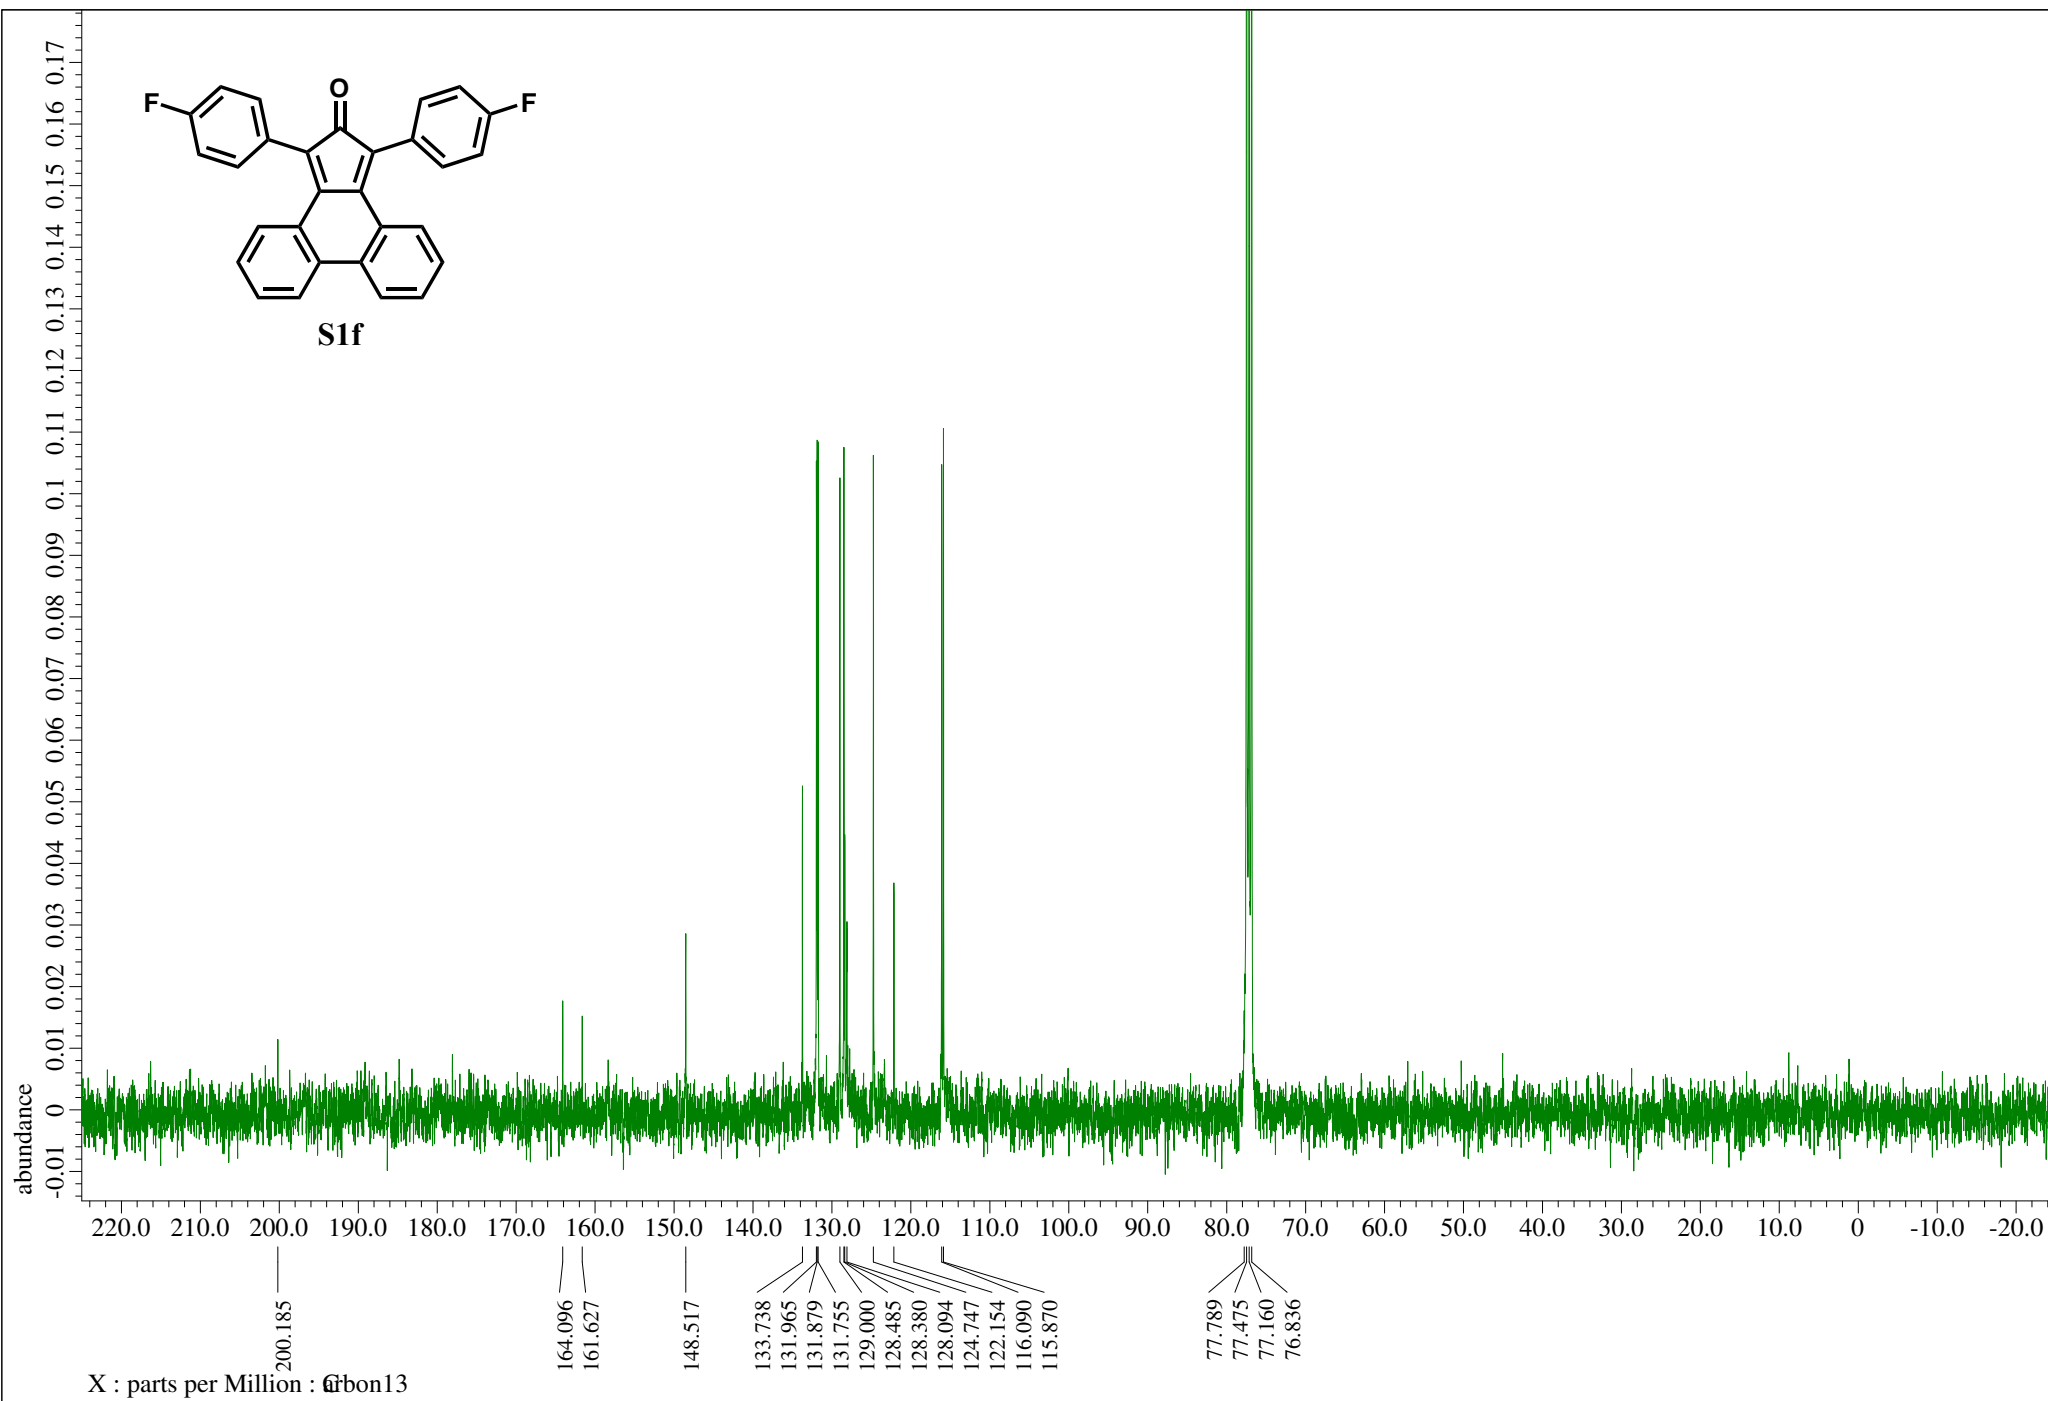

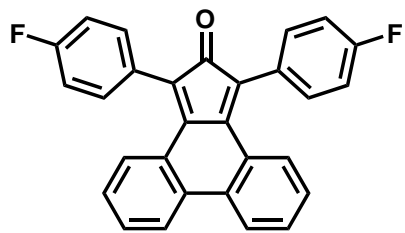

**S1f**

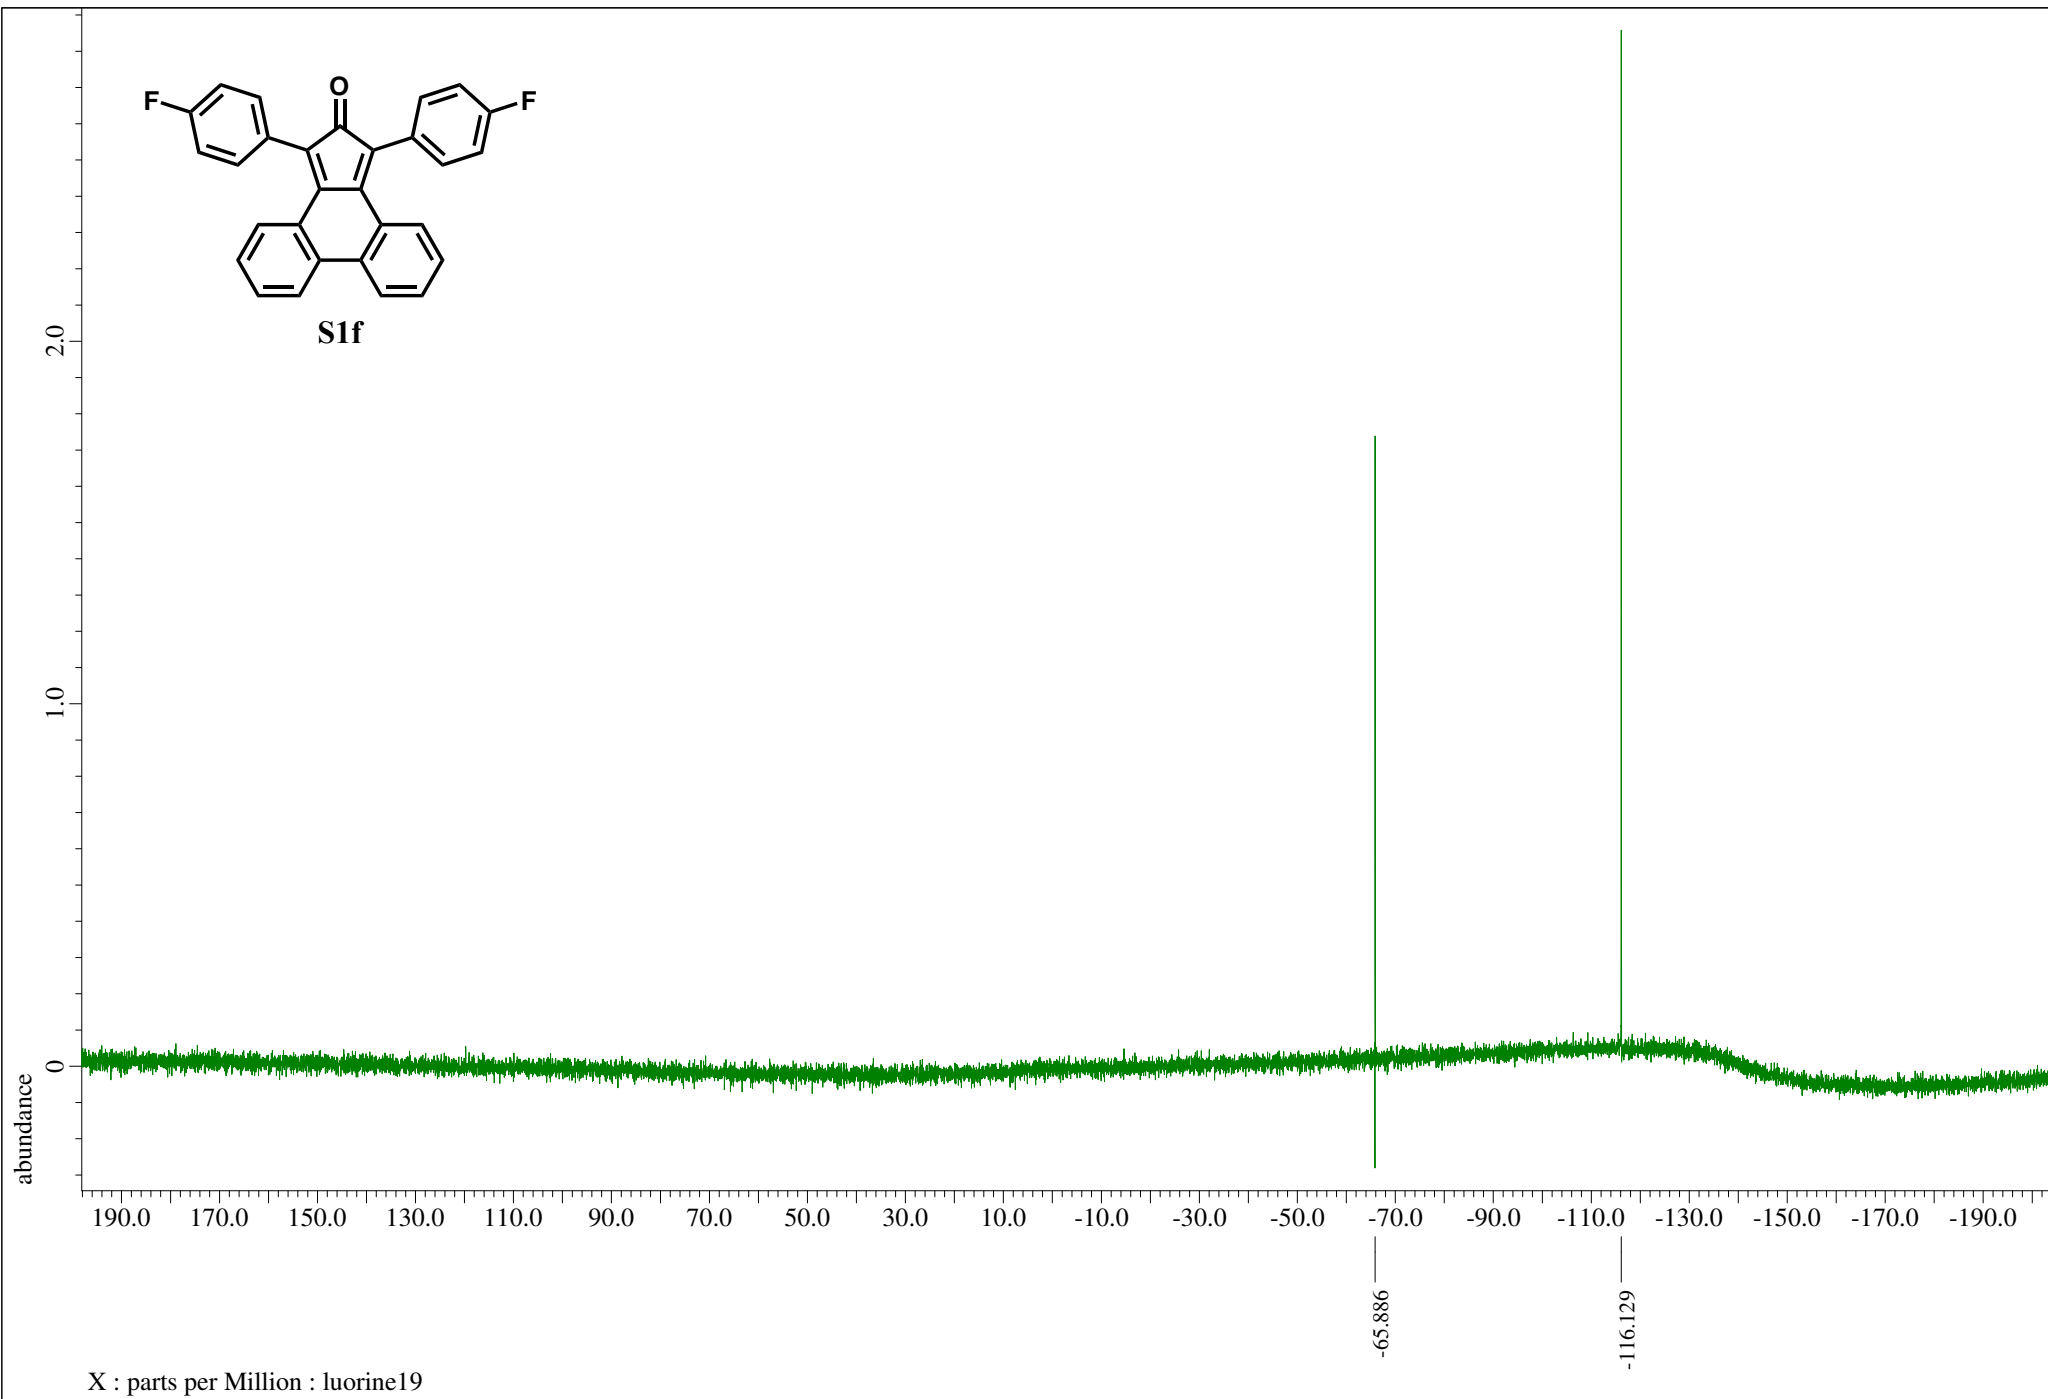

X : parts per Million : luorine19

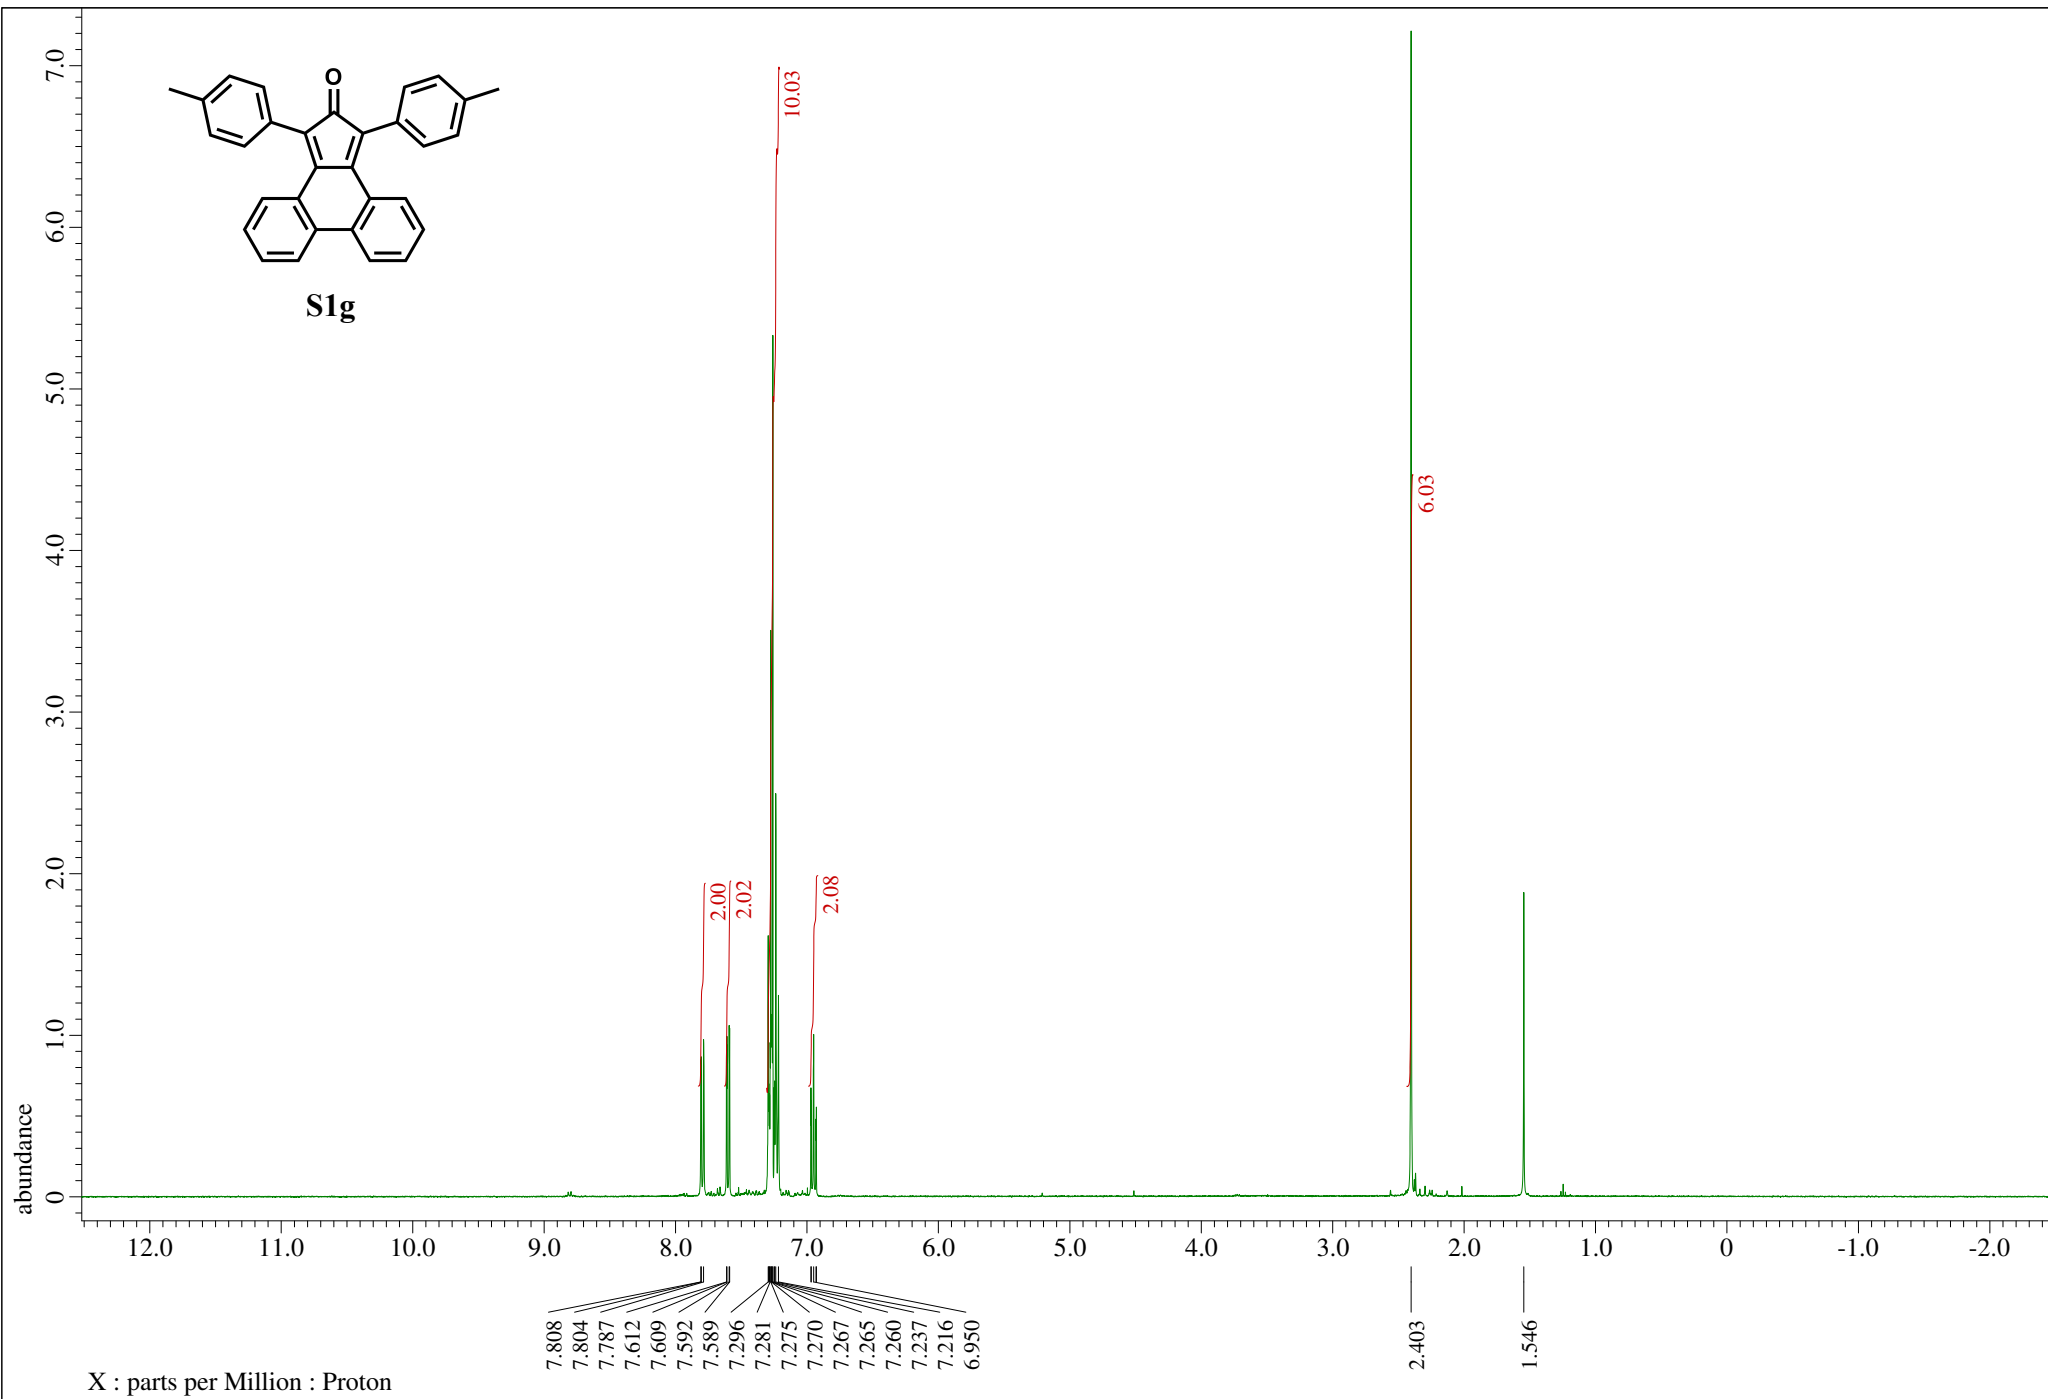

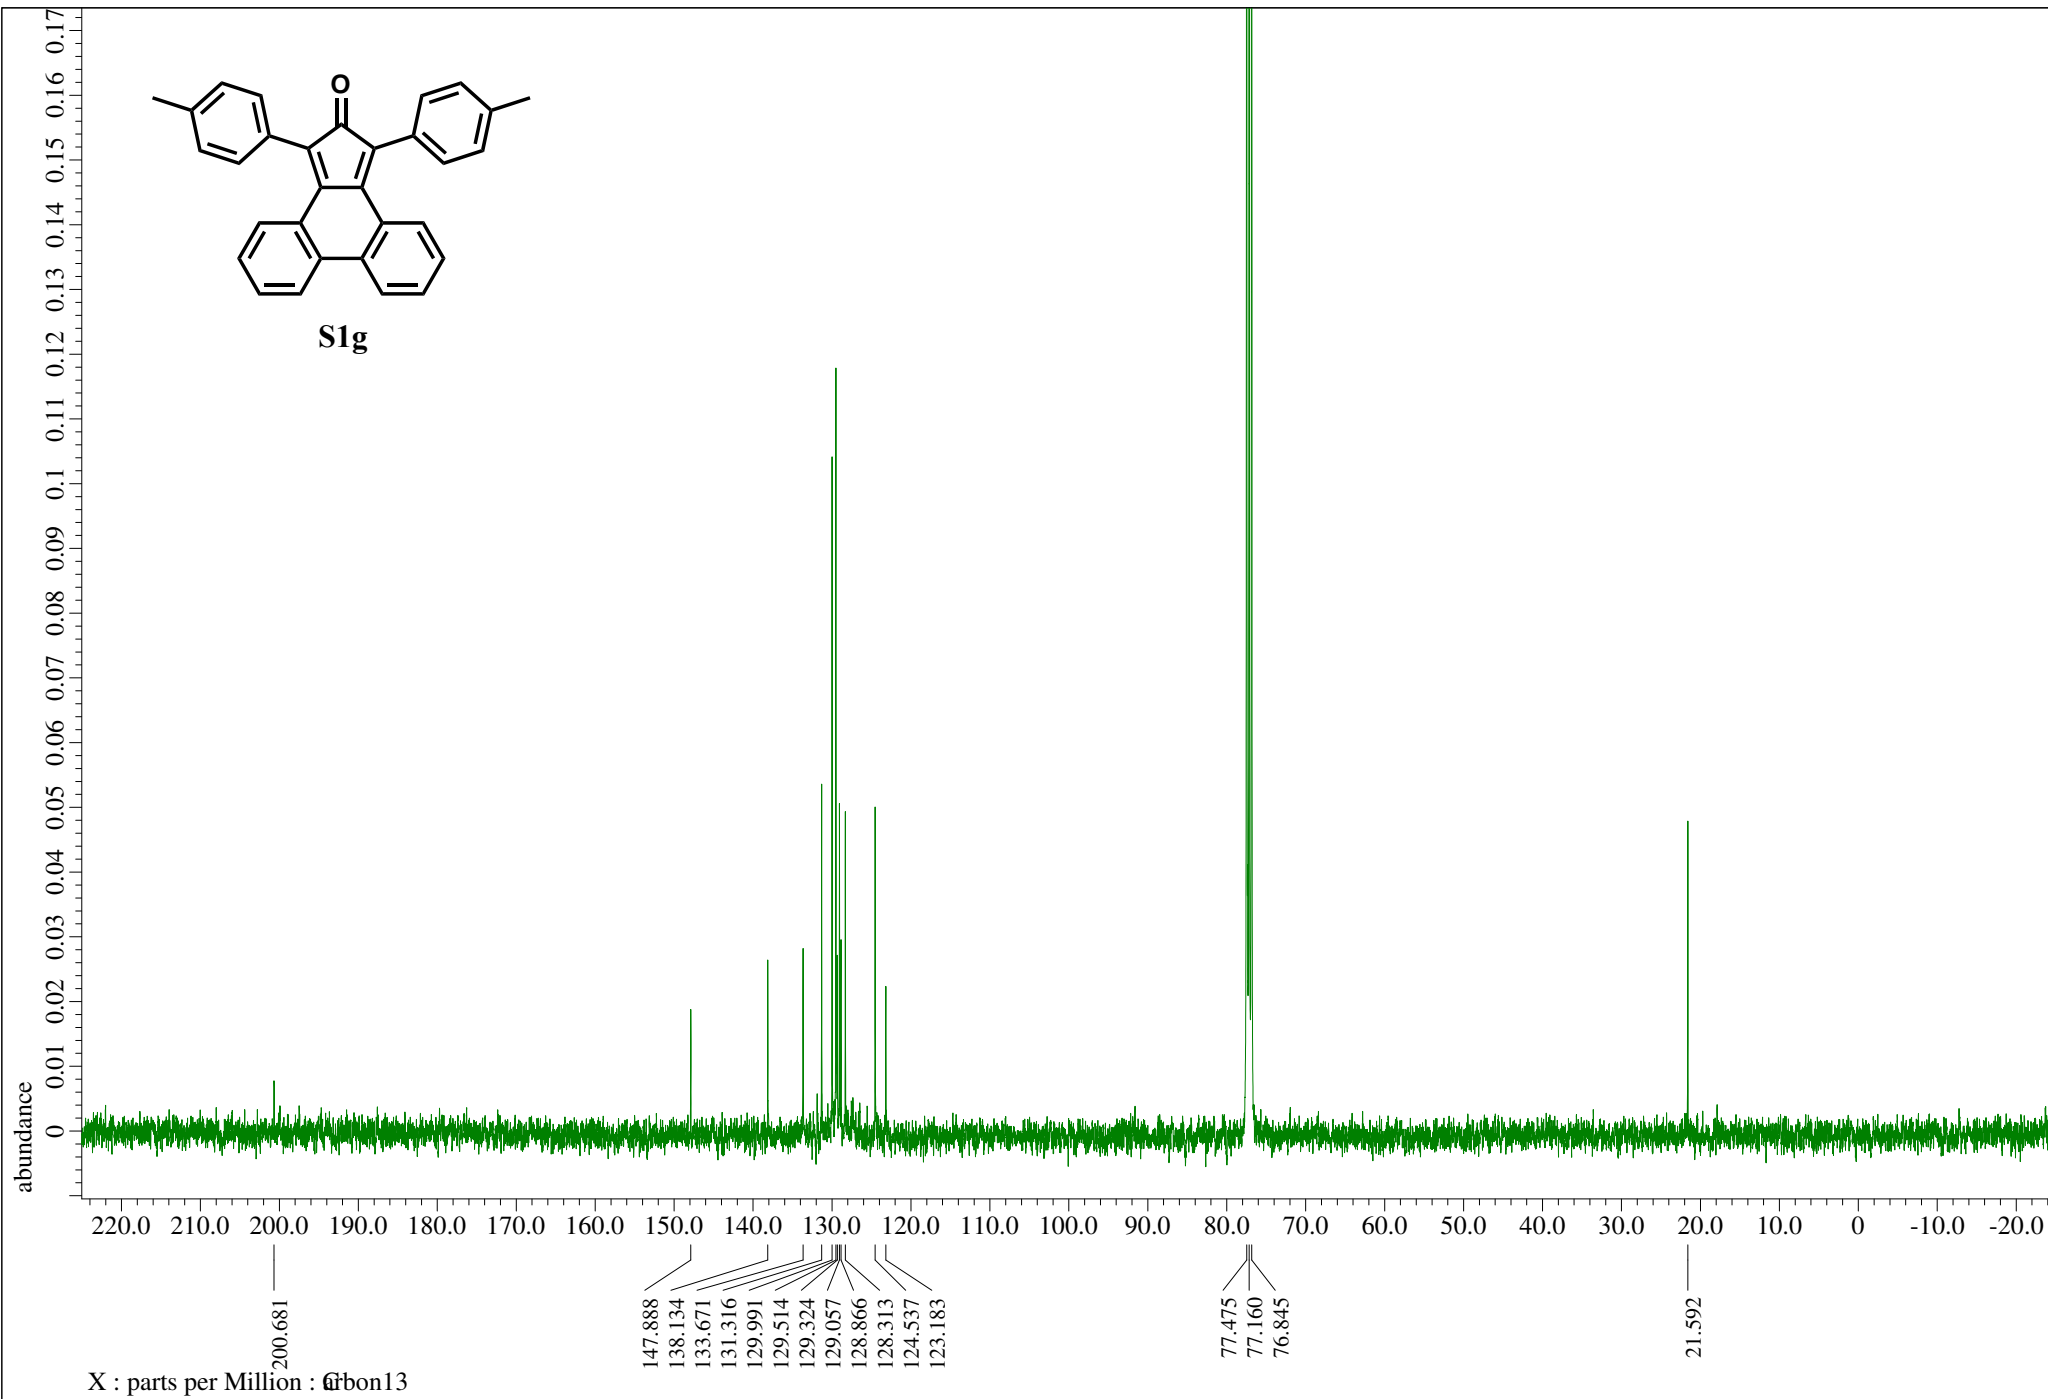



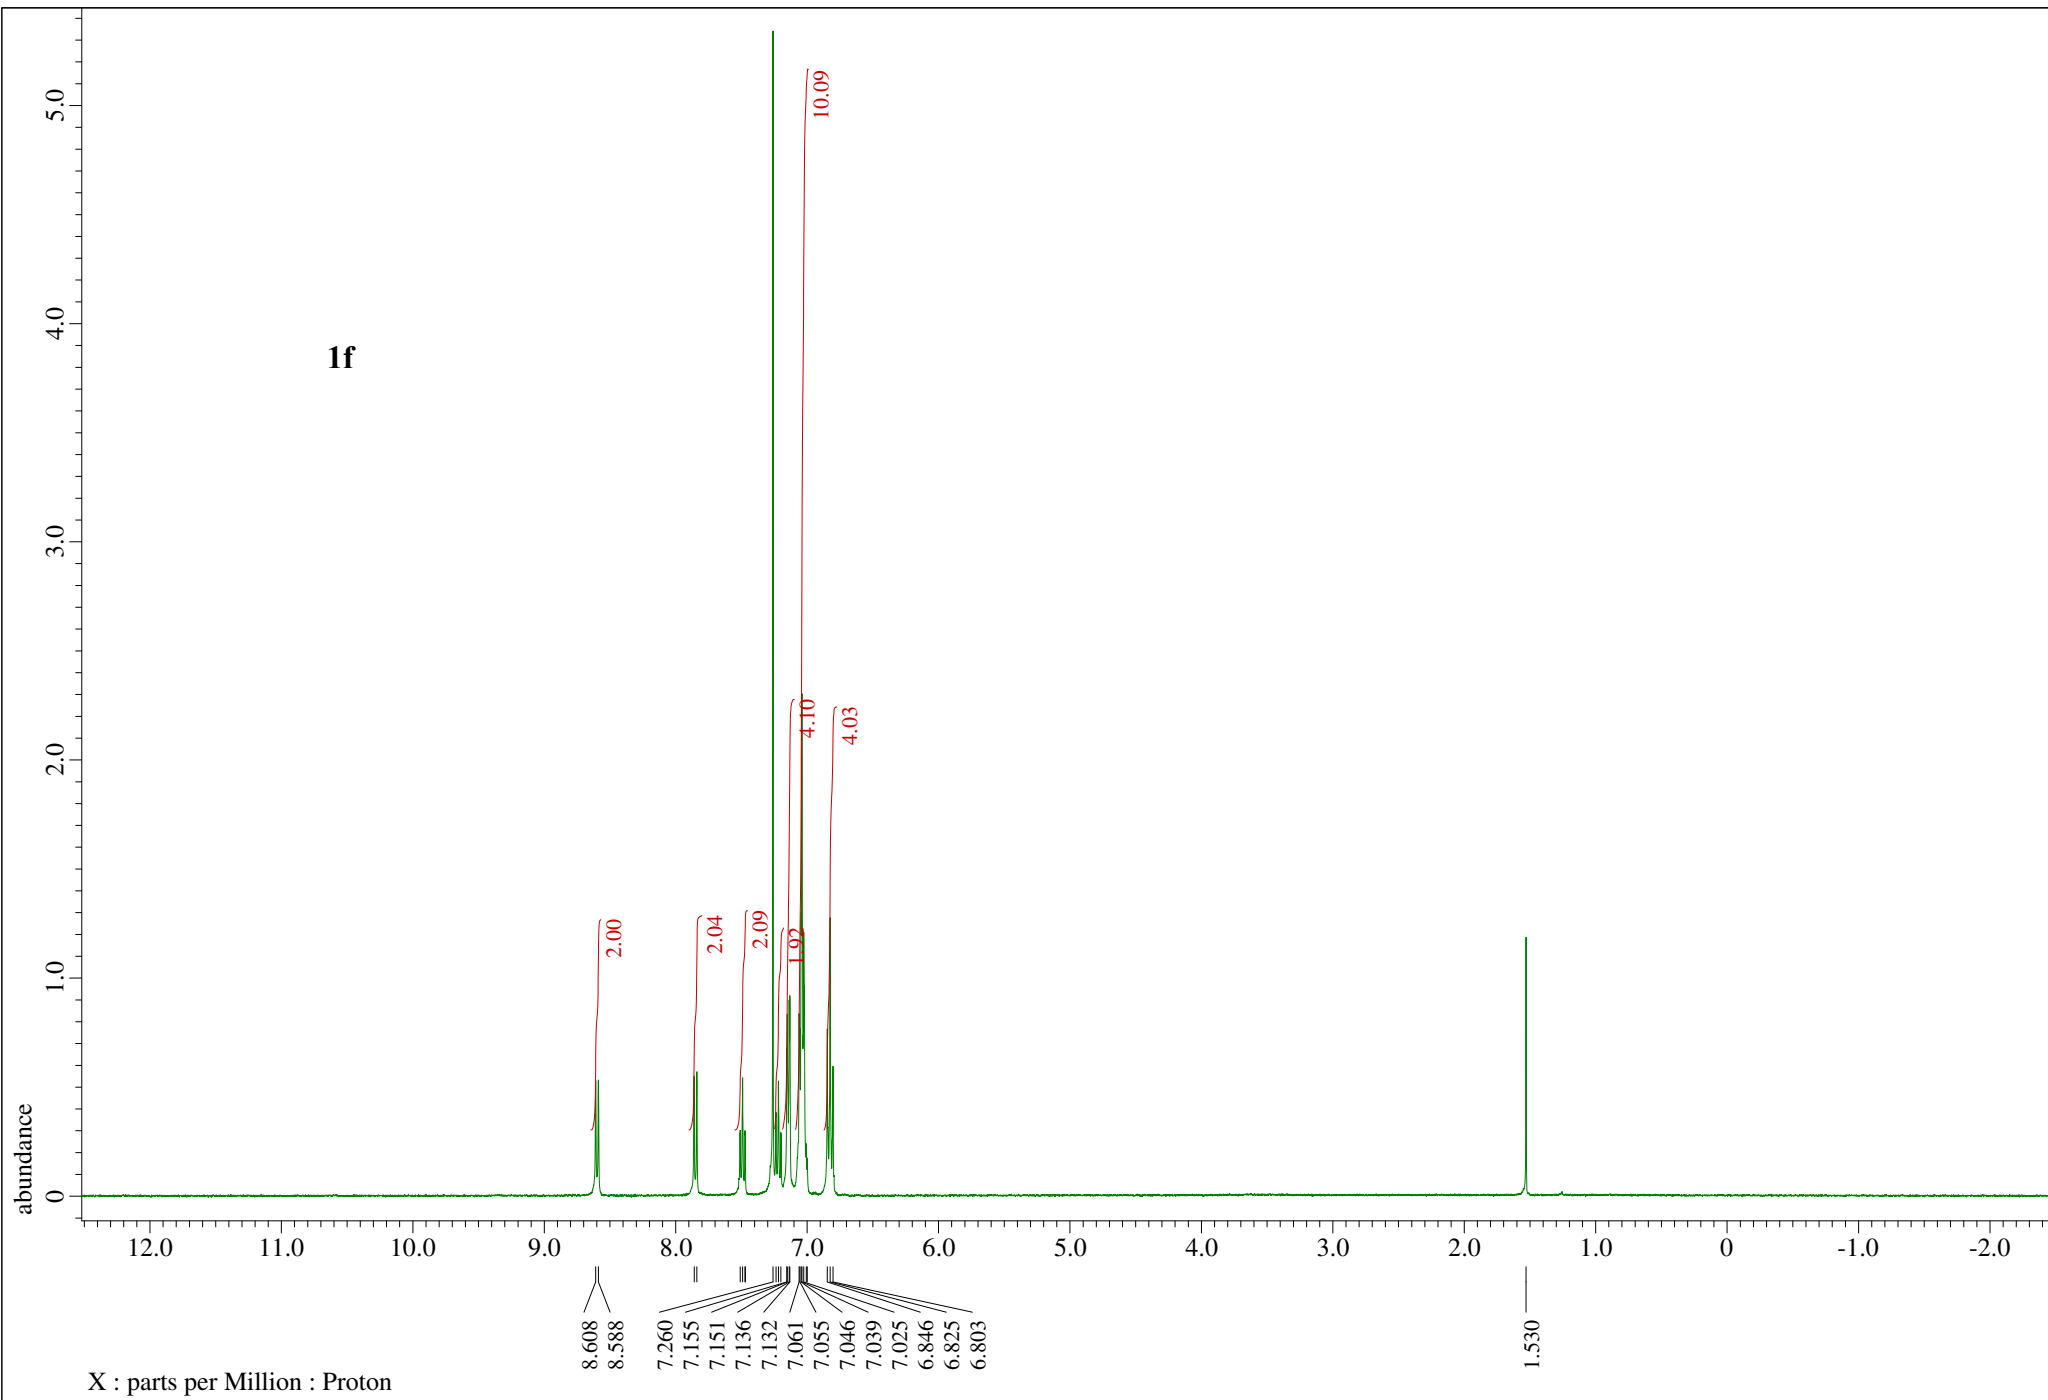

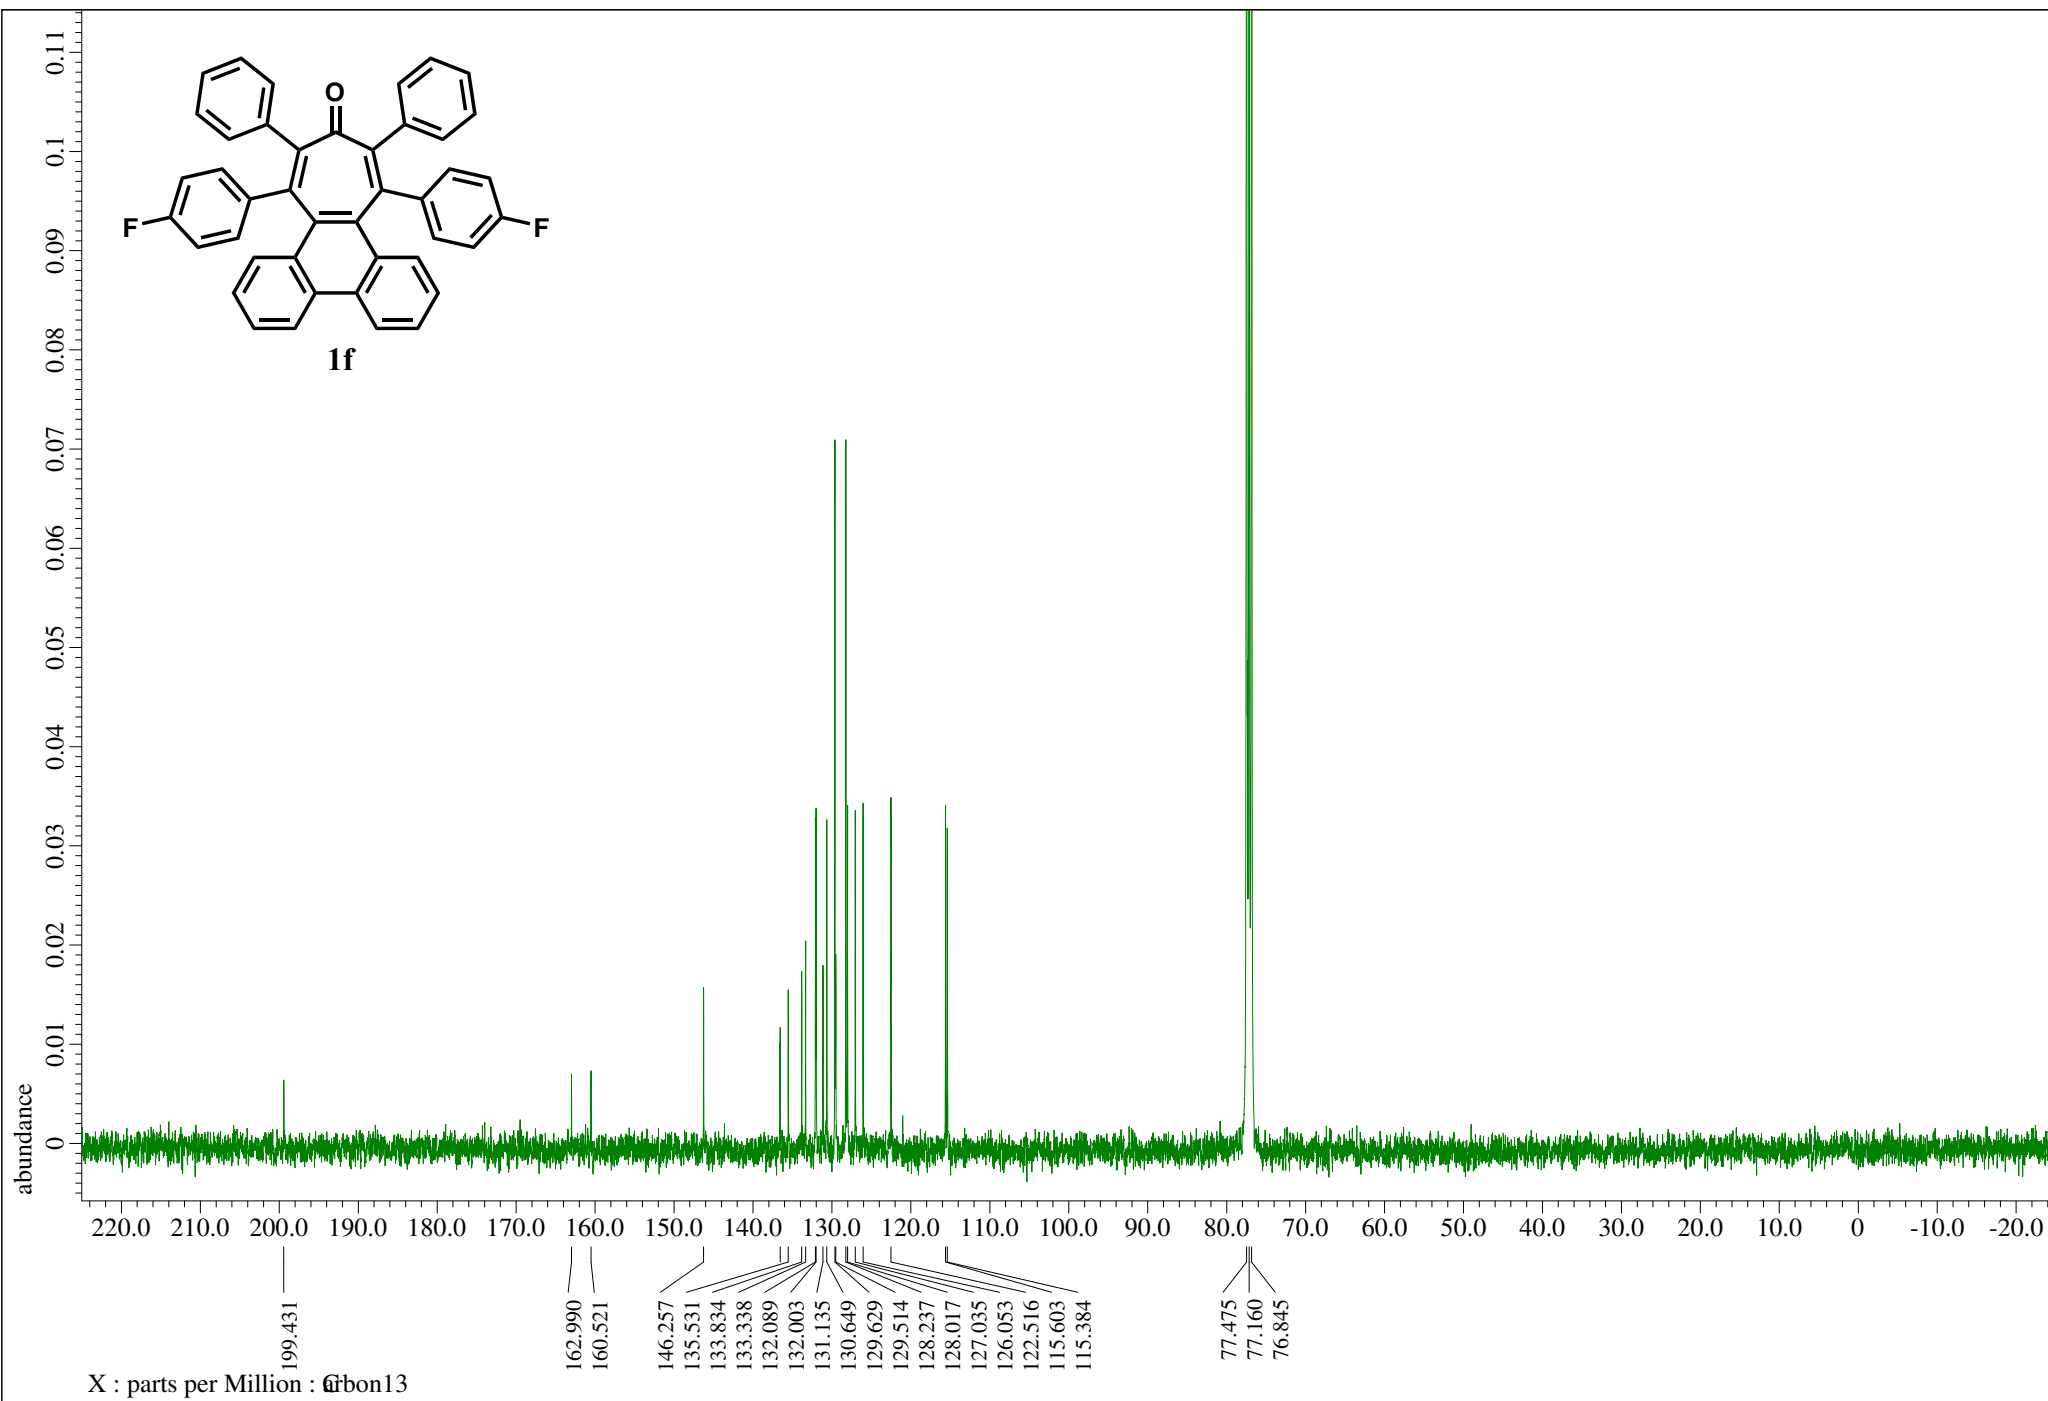



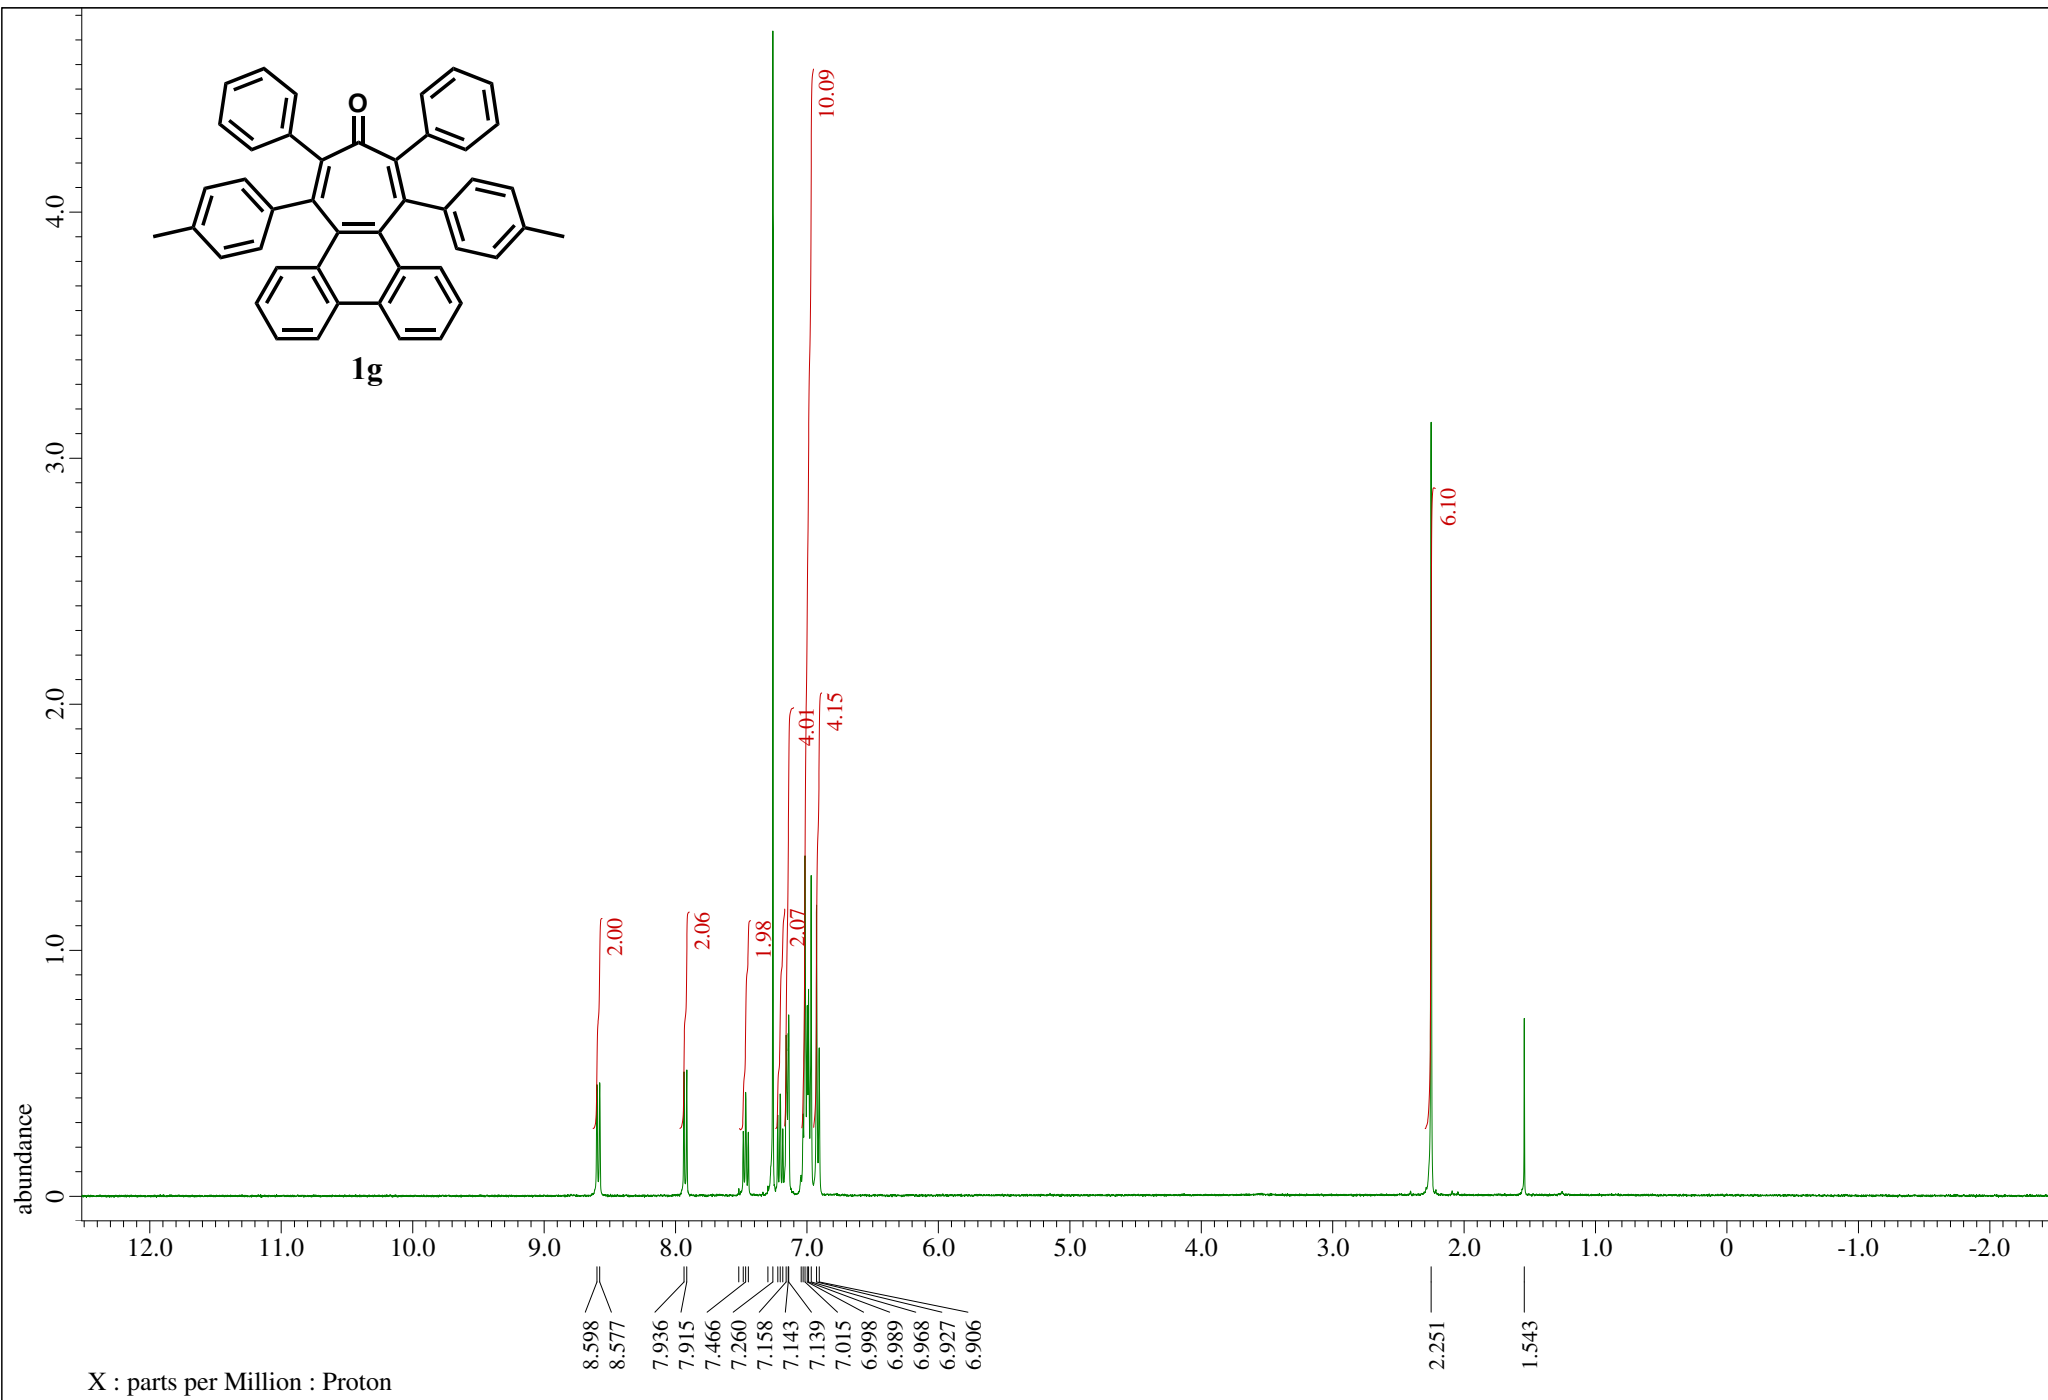

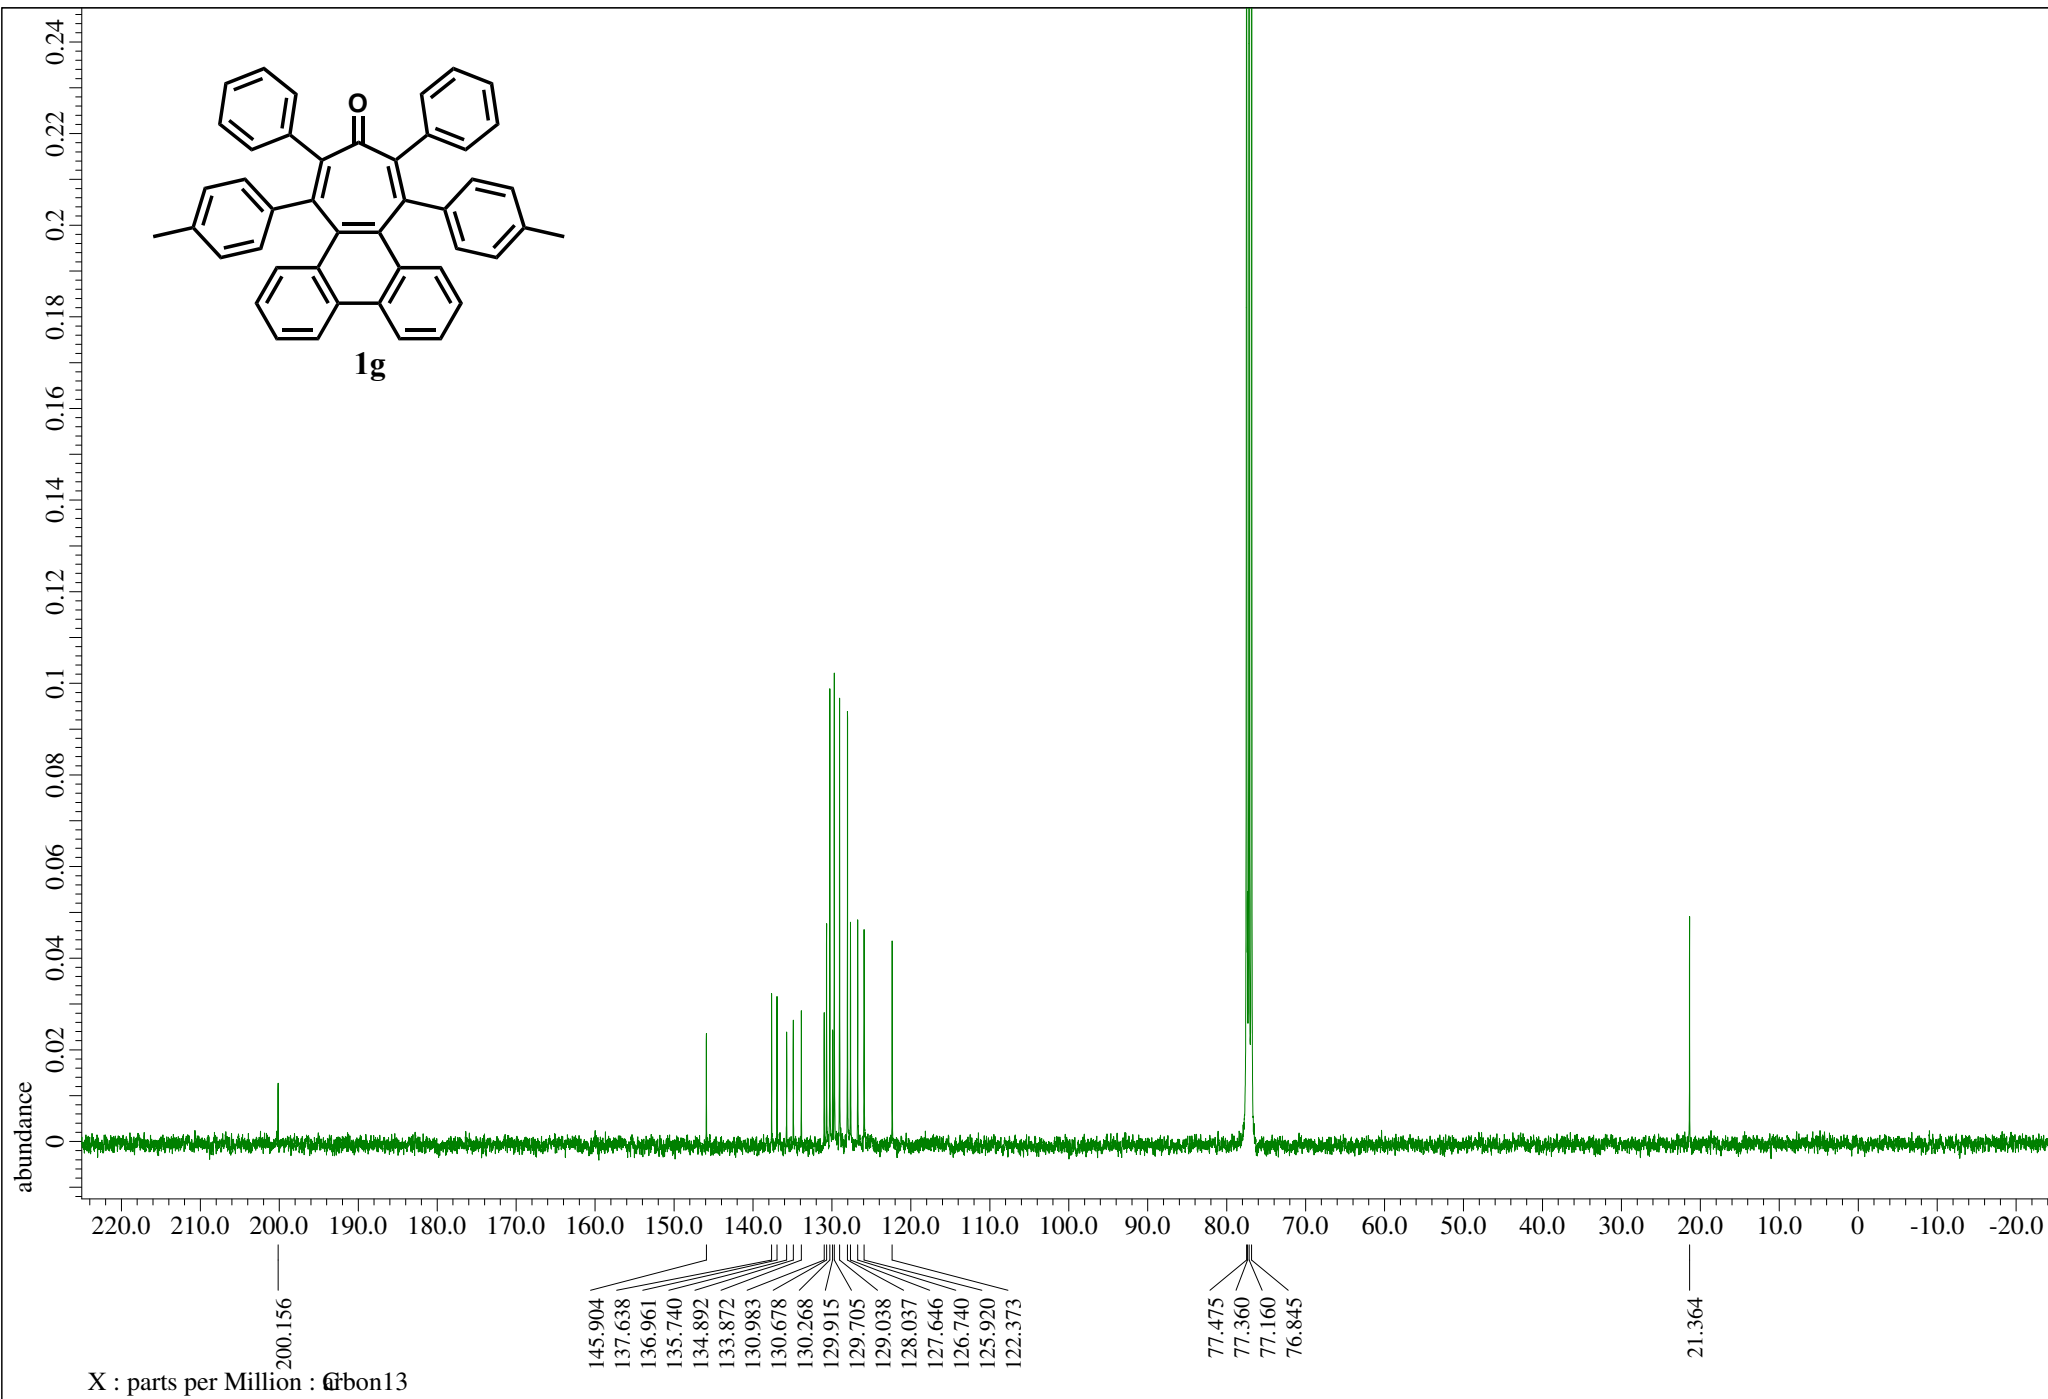

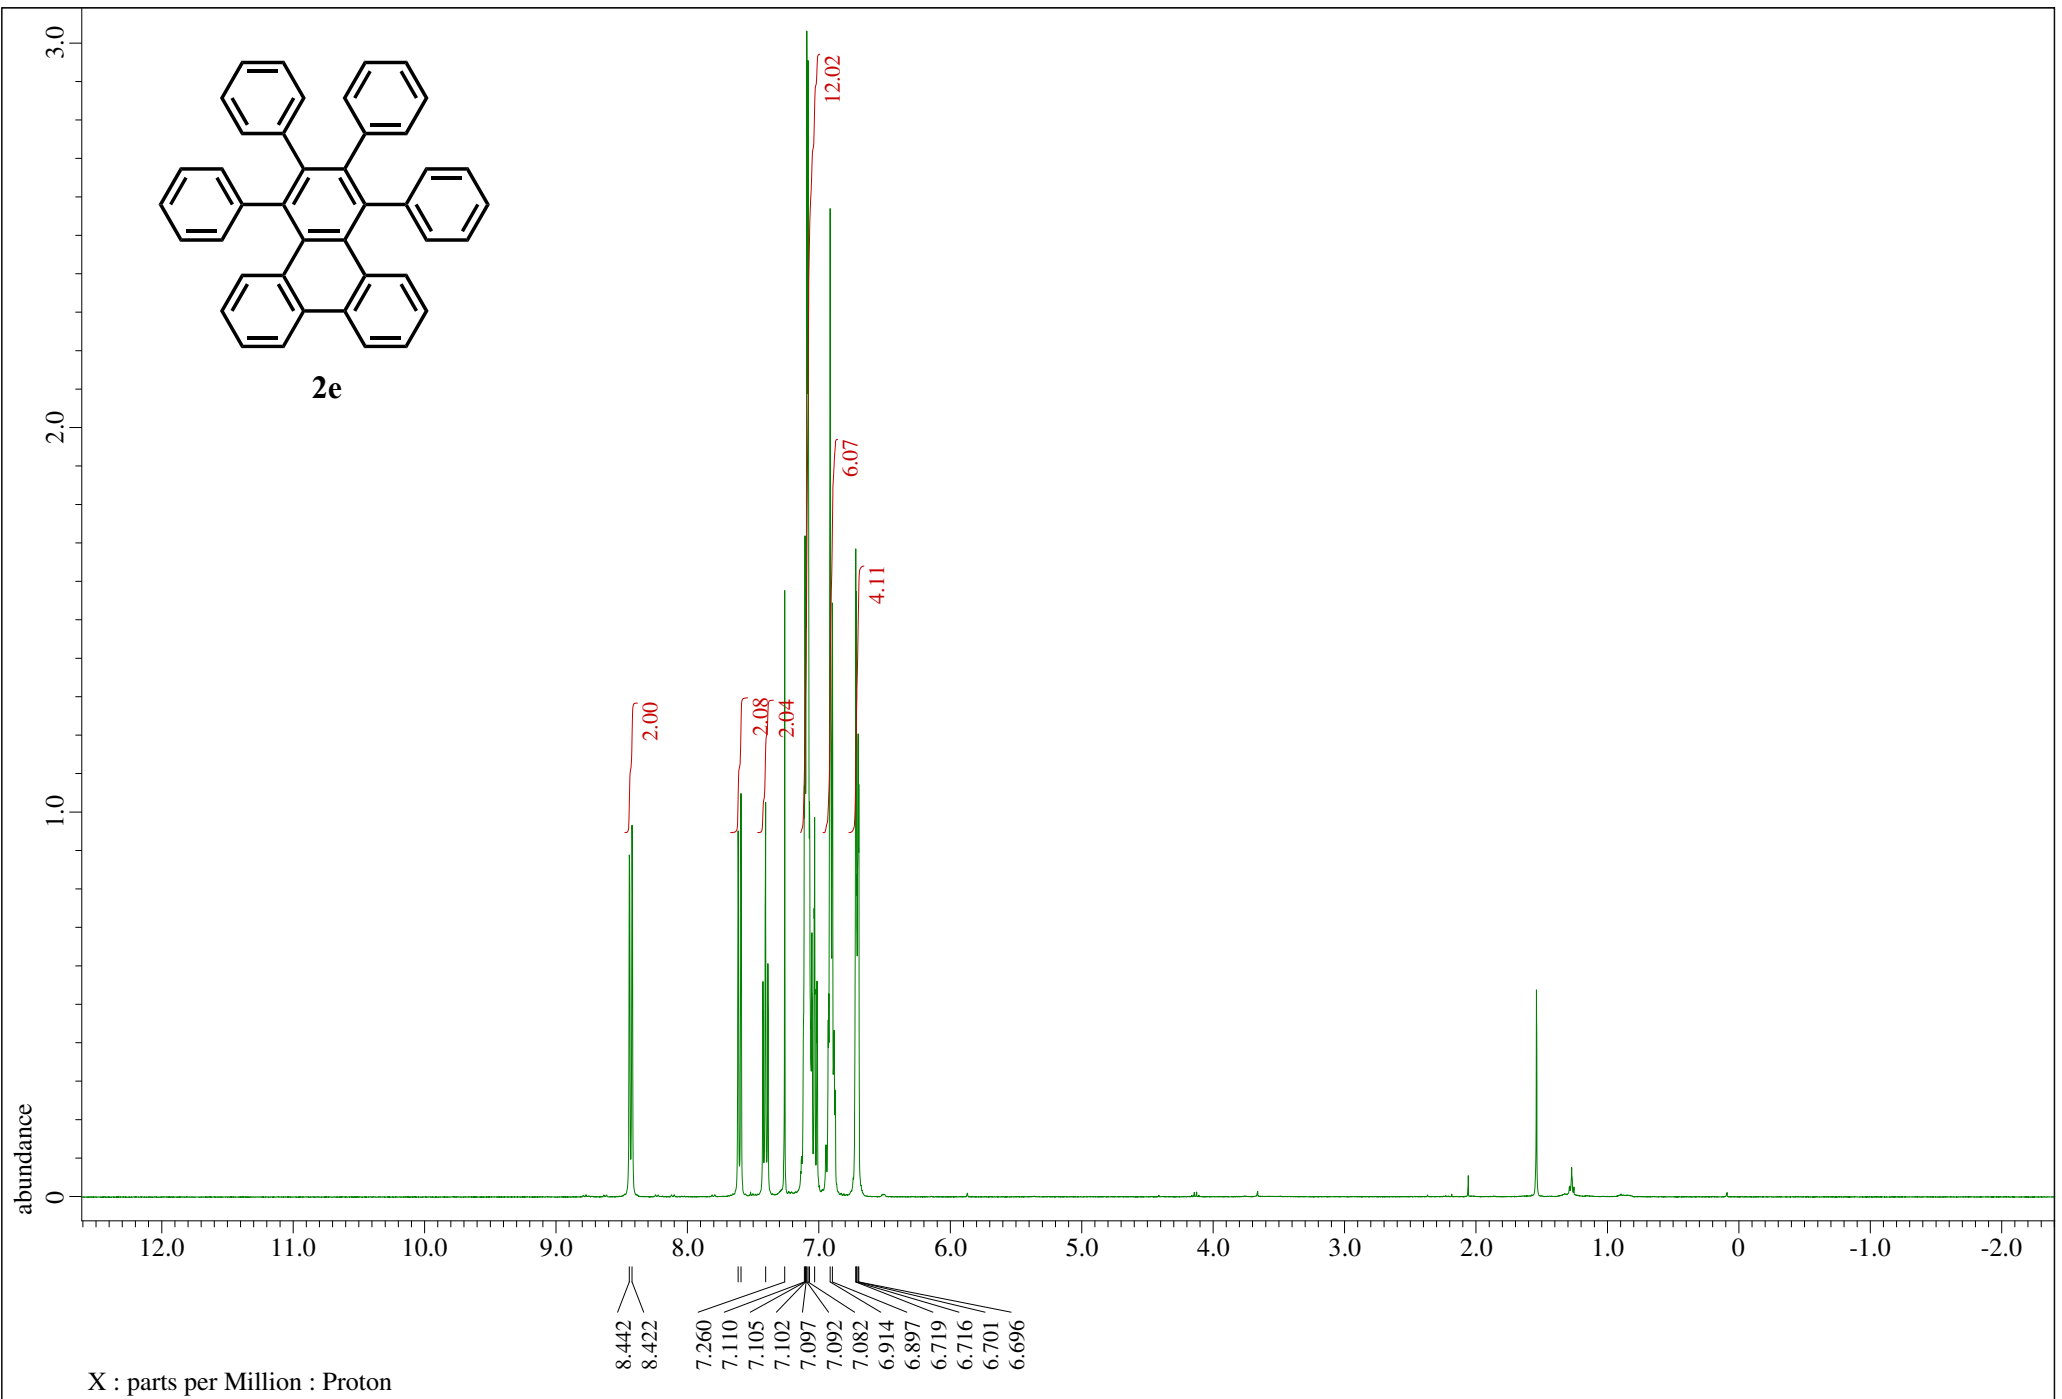

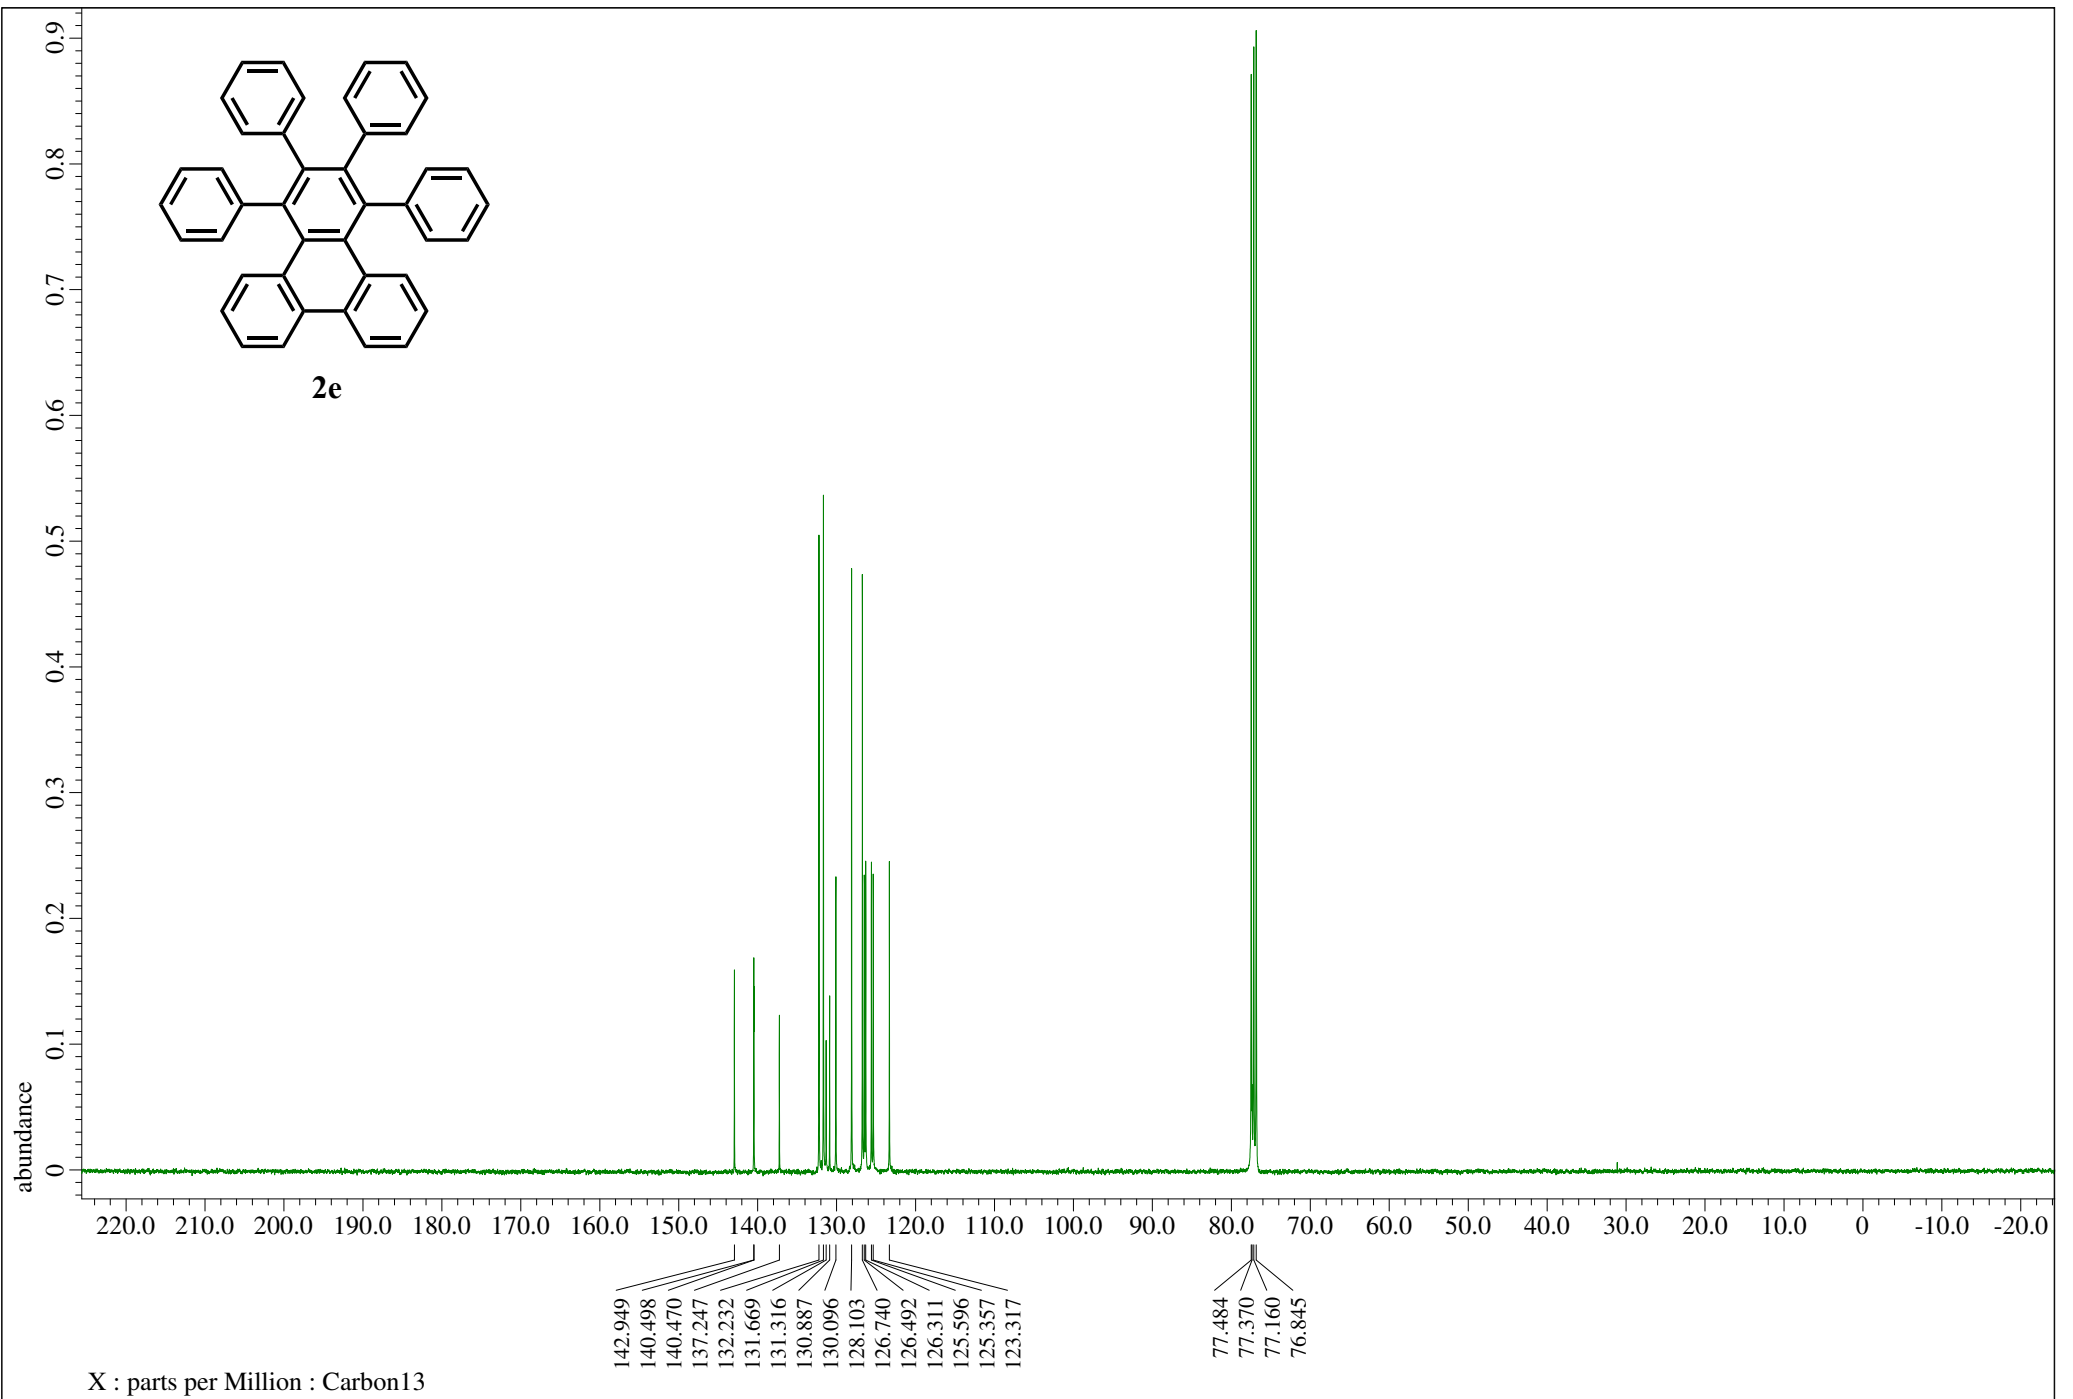

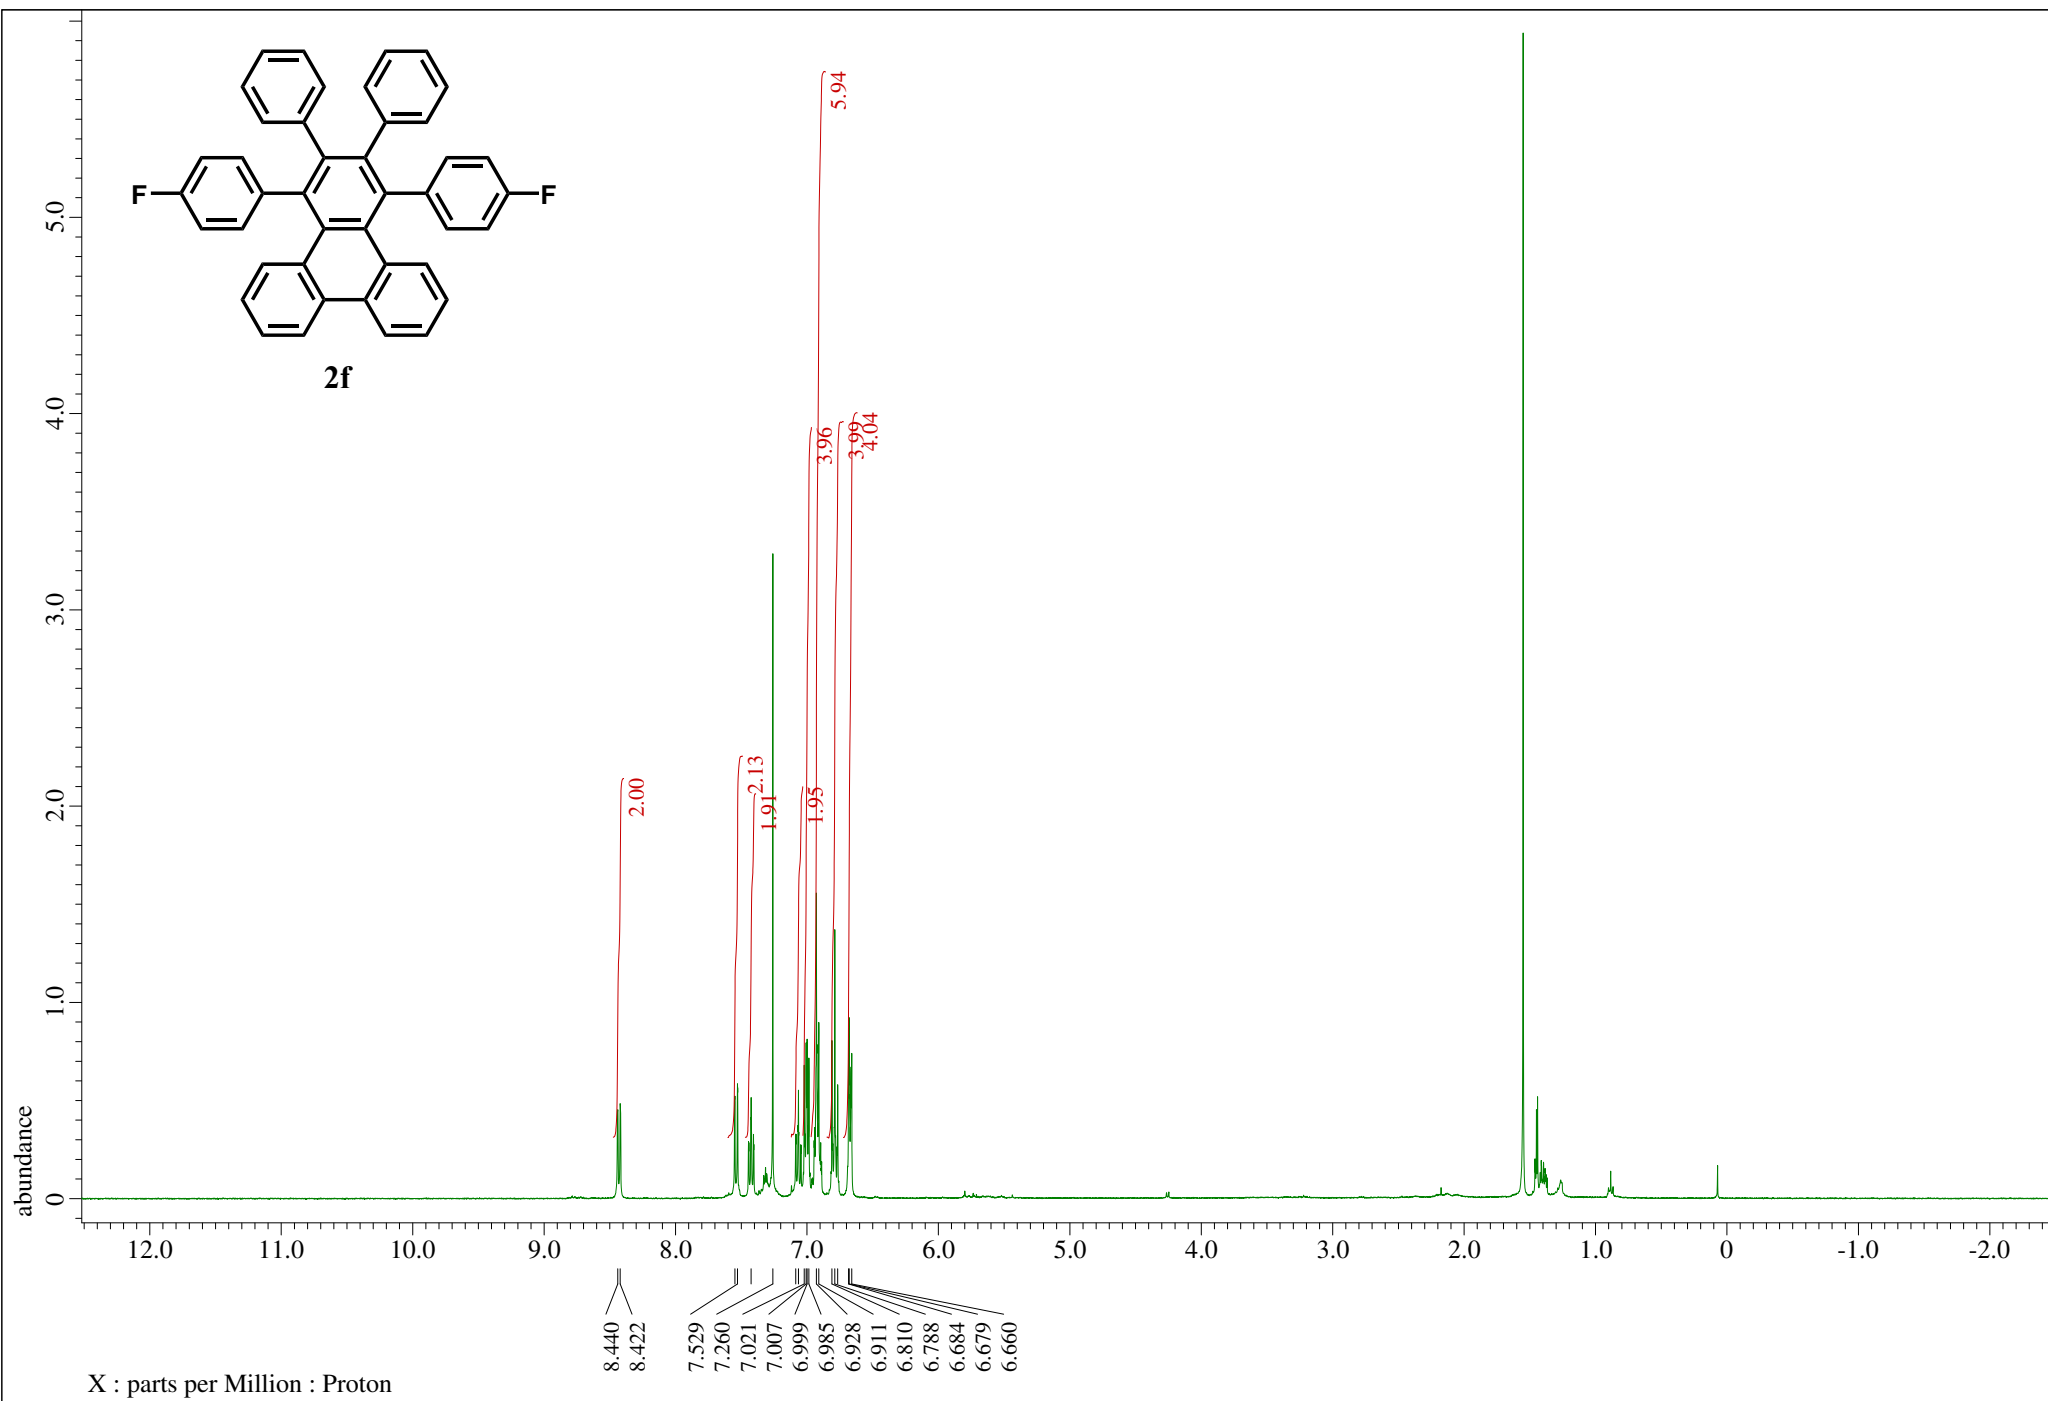



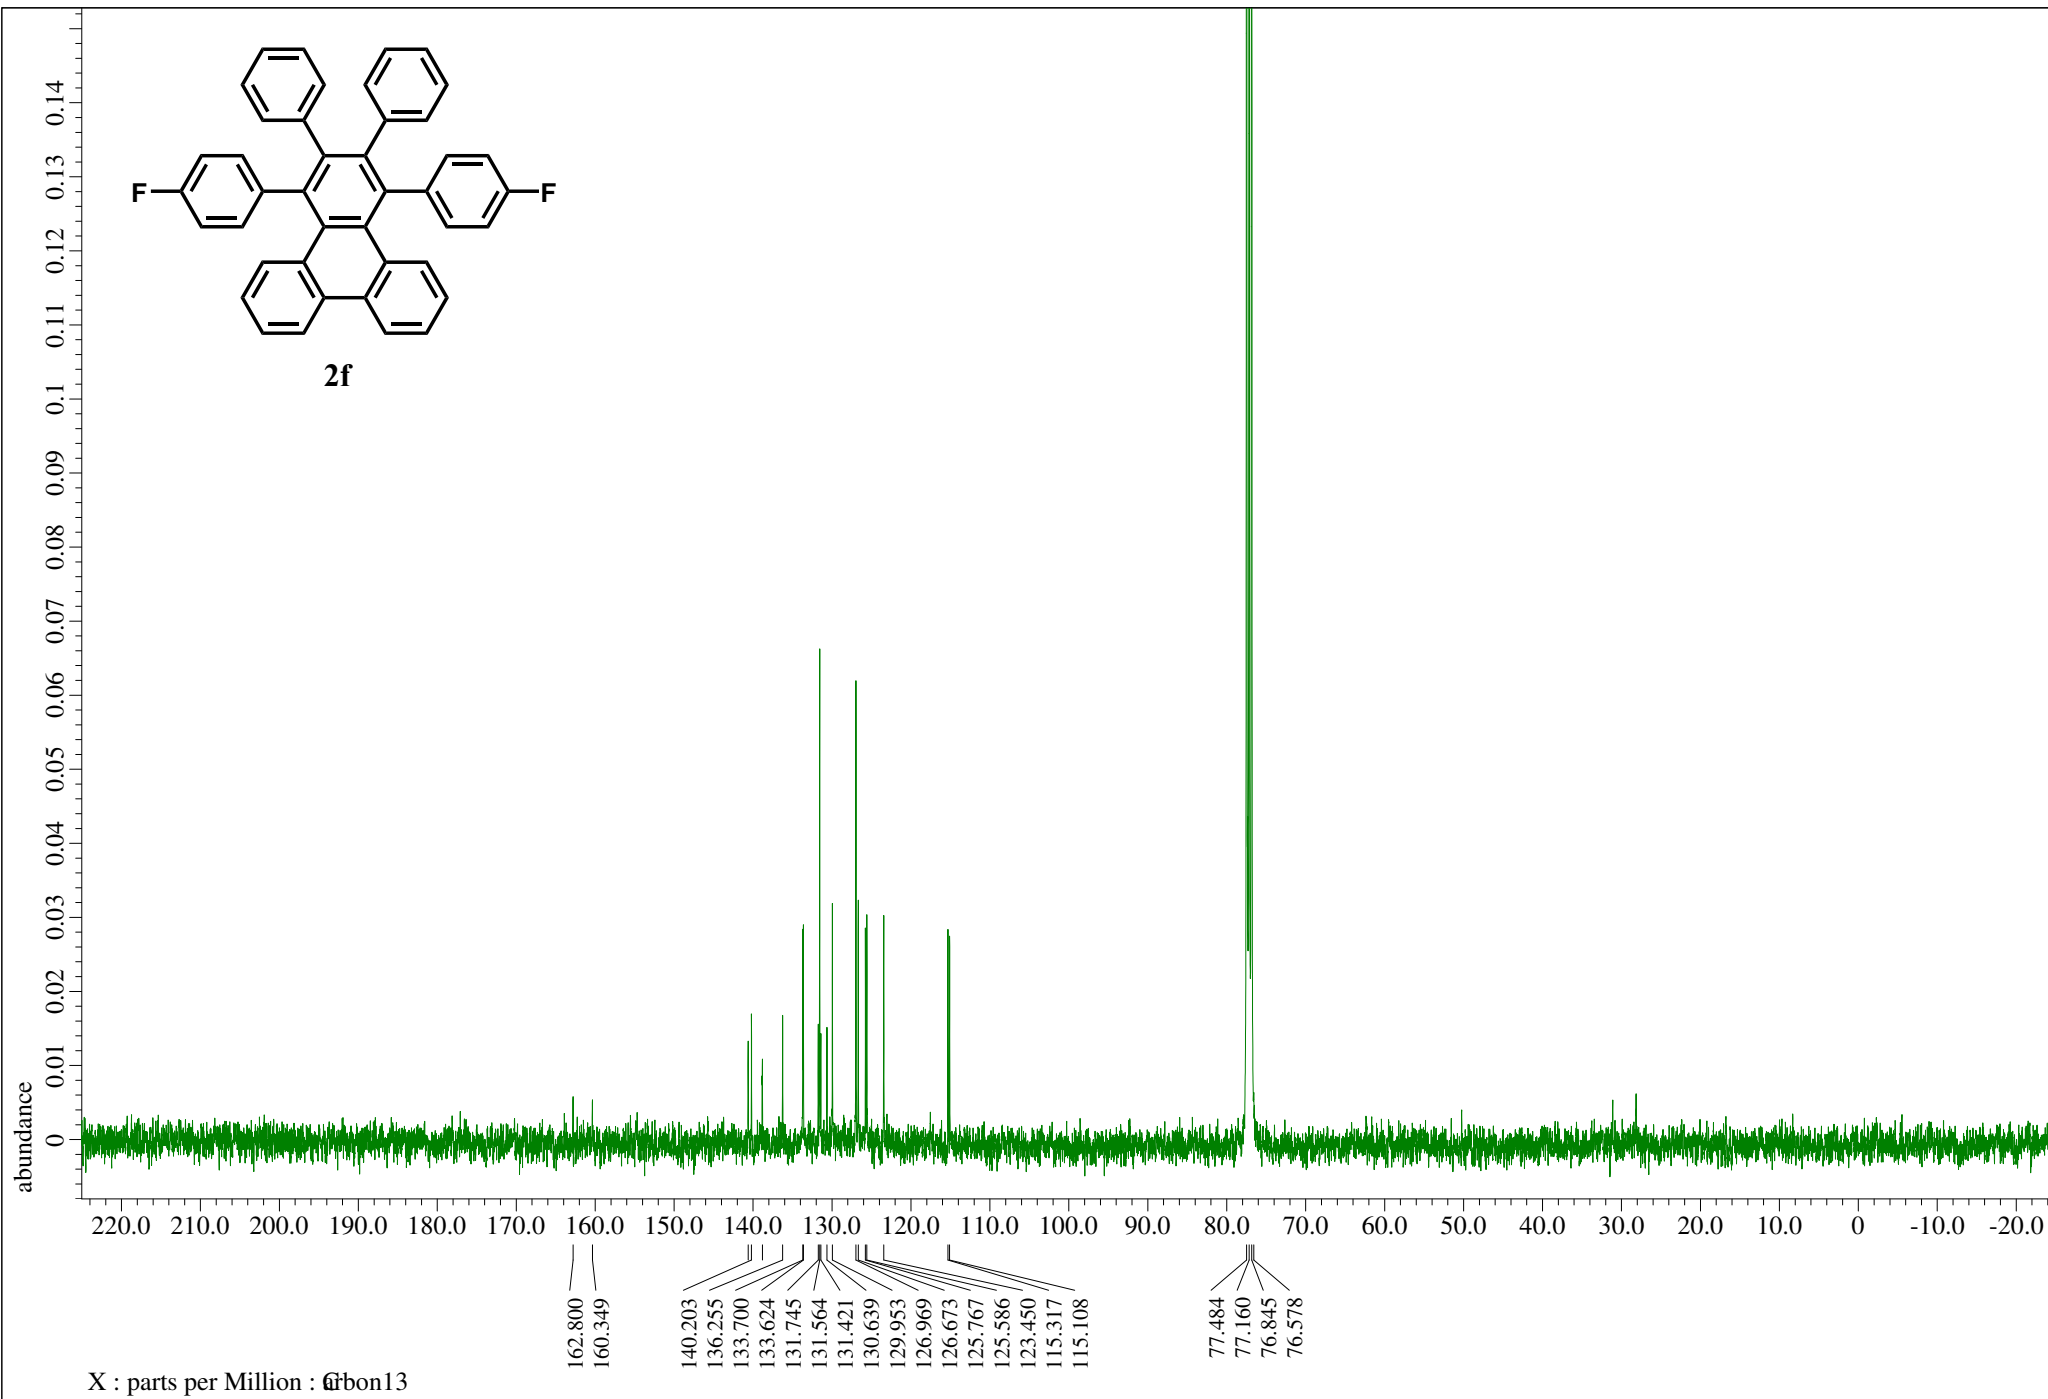

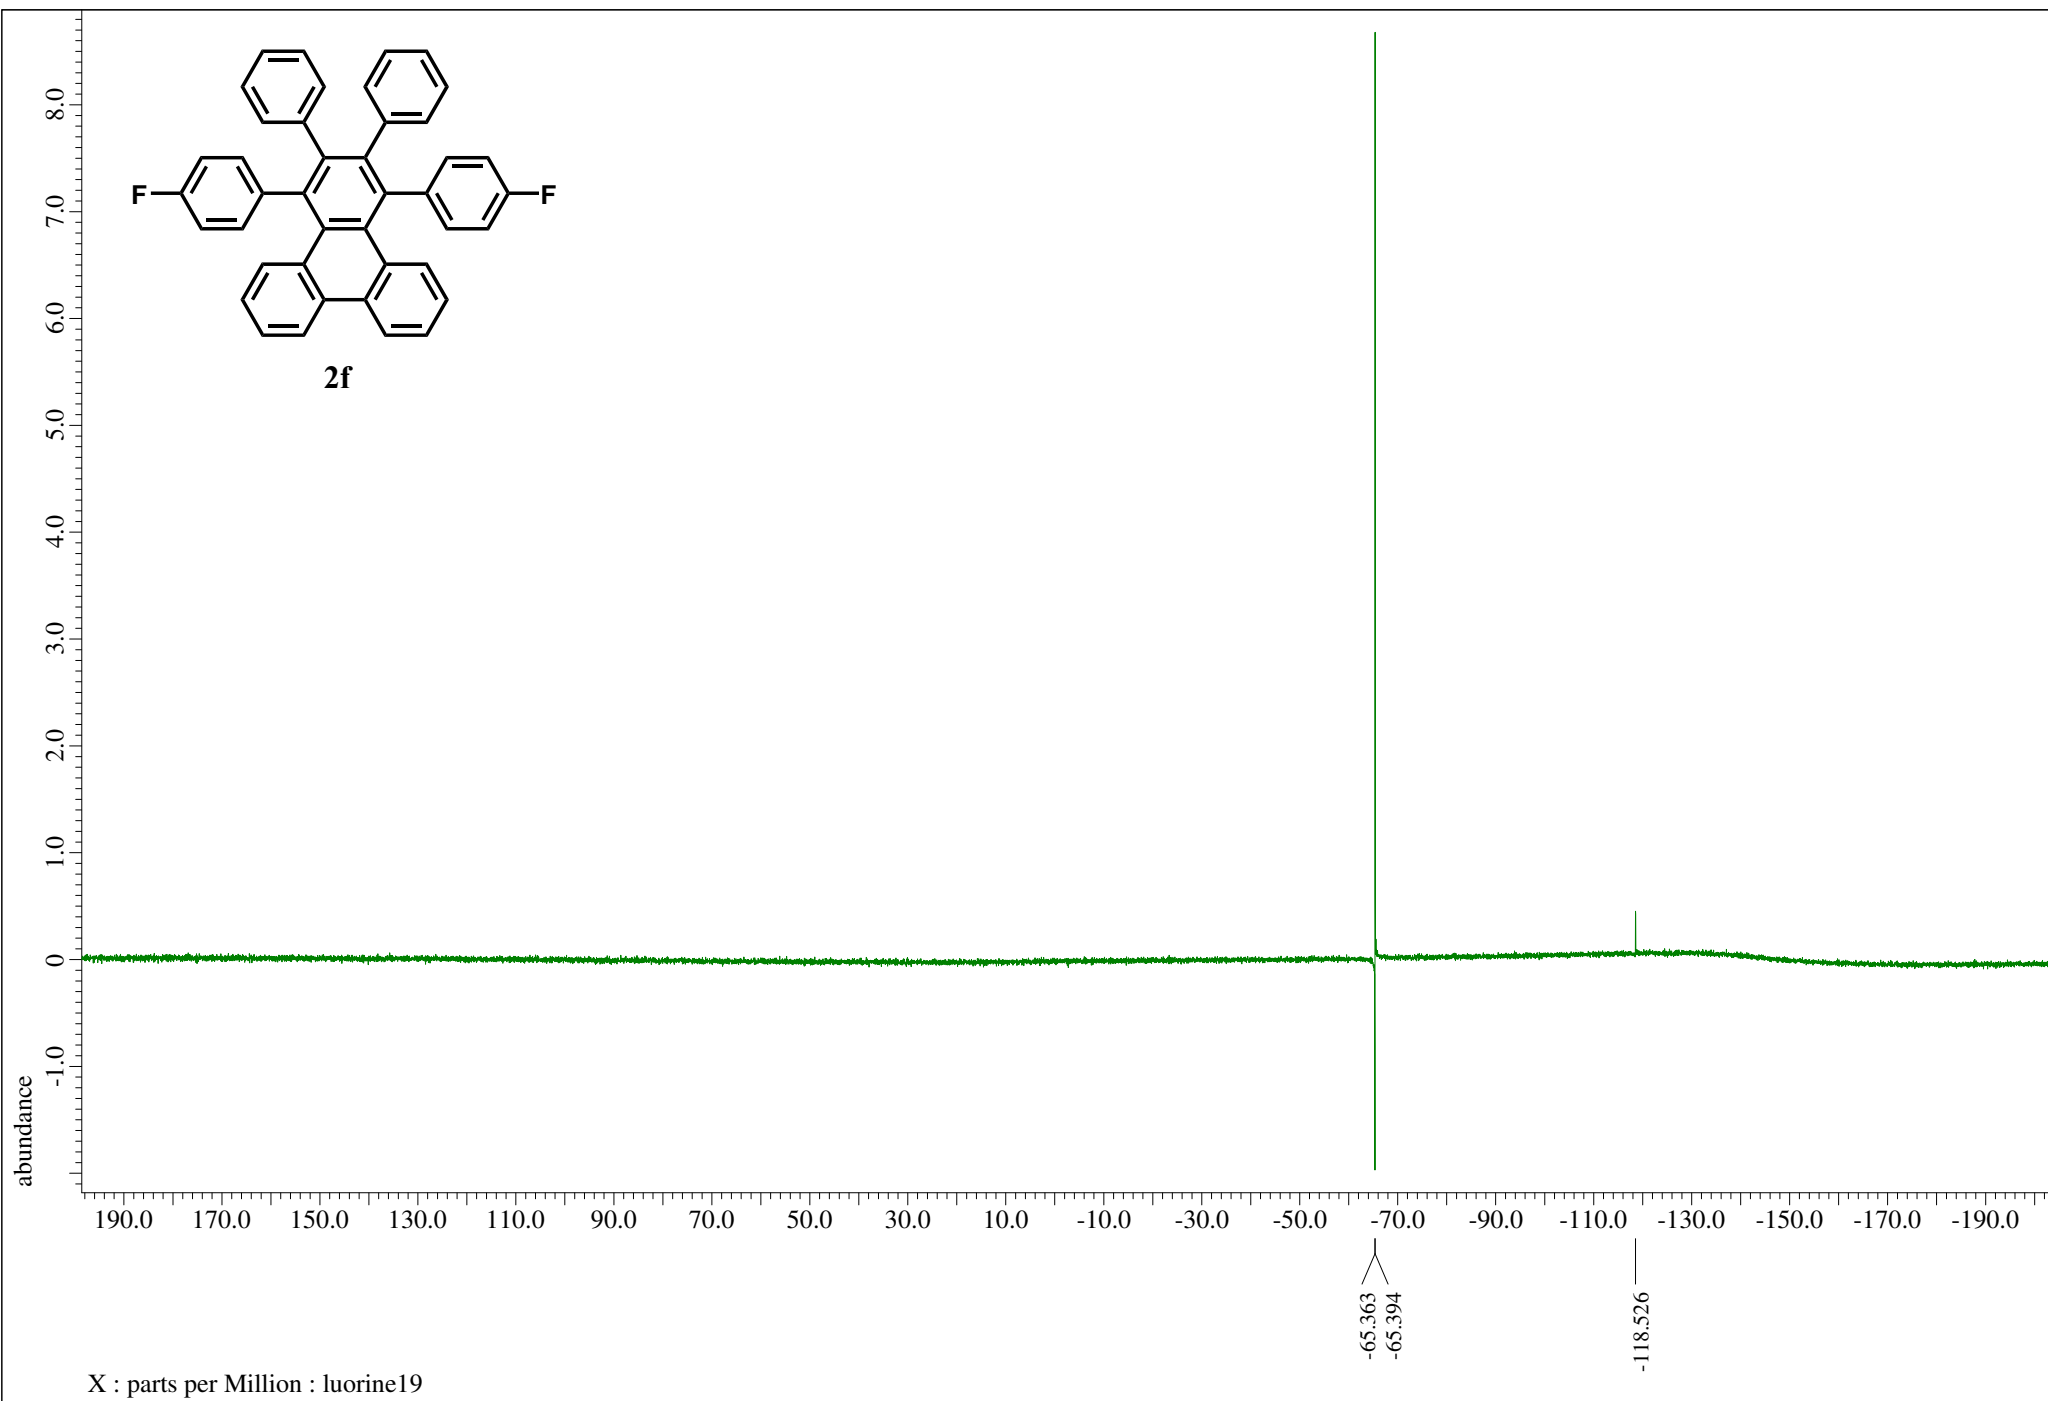

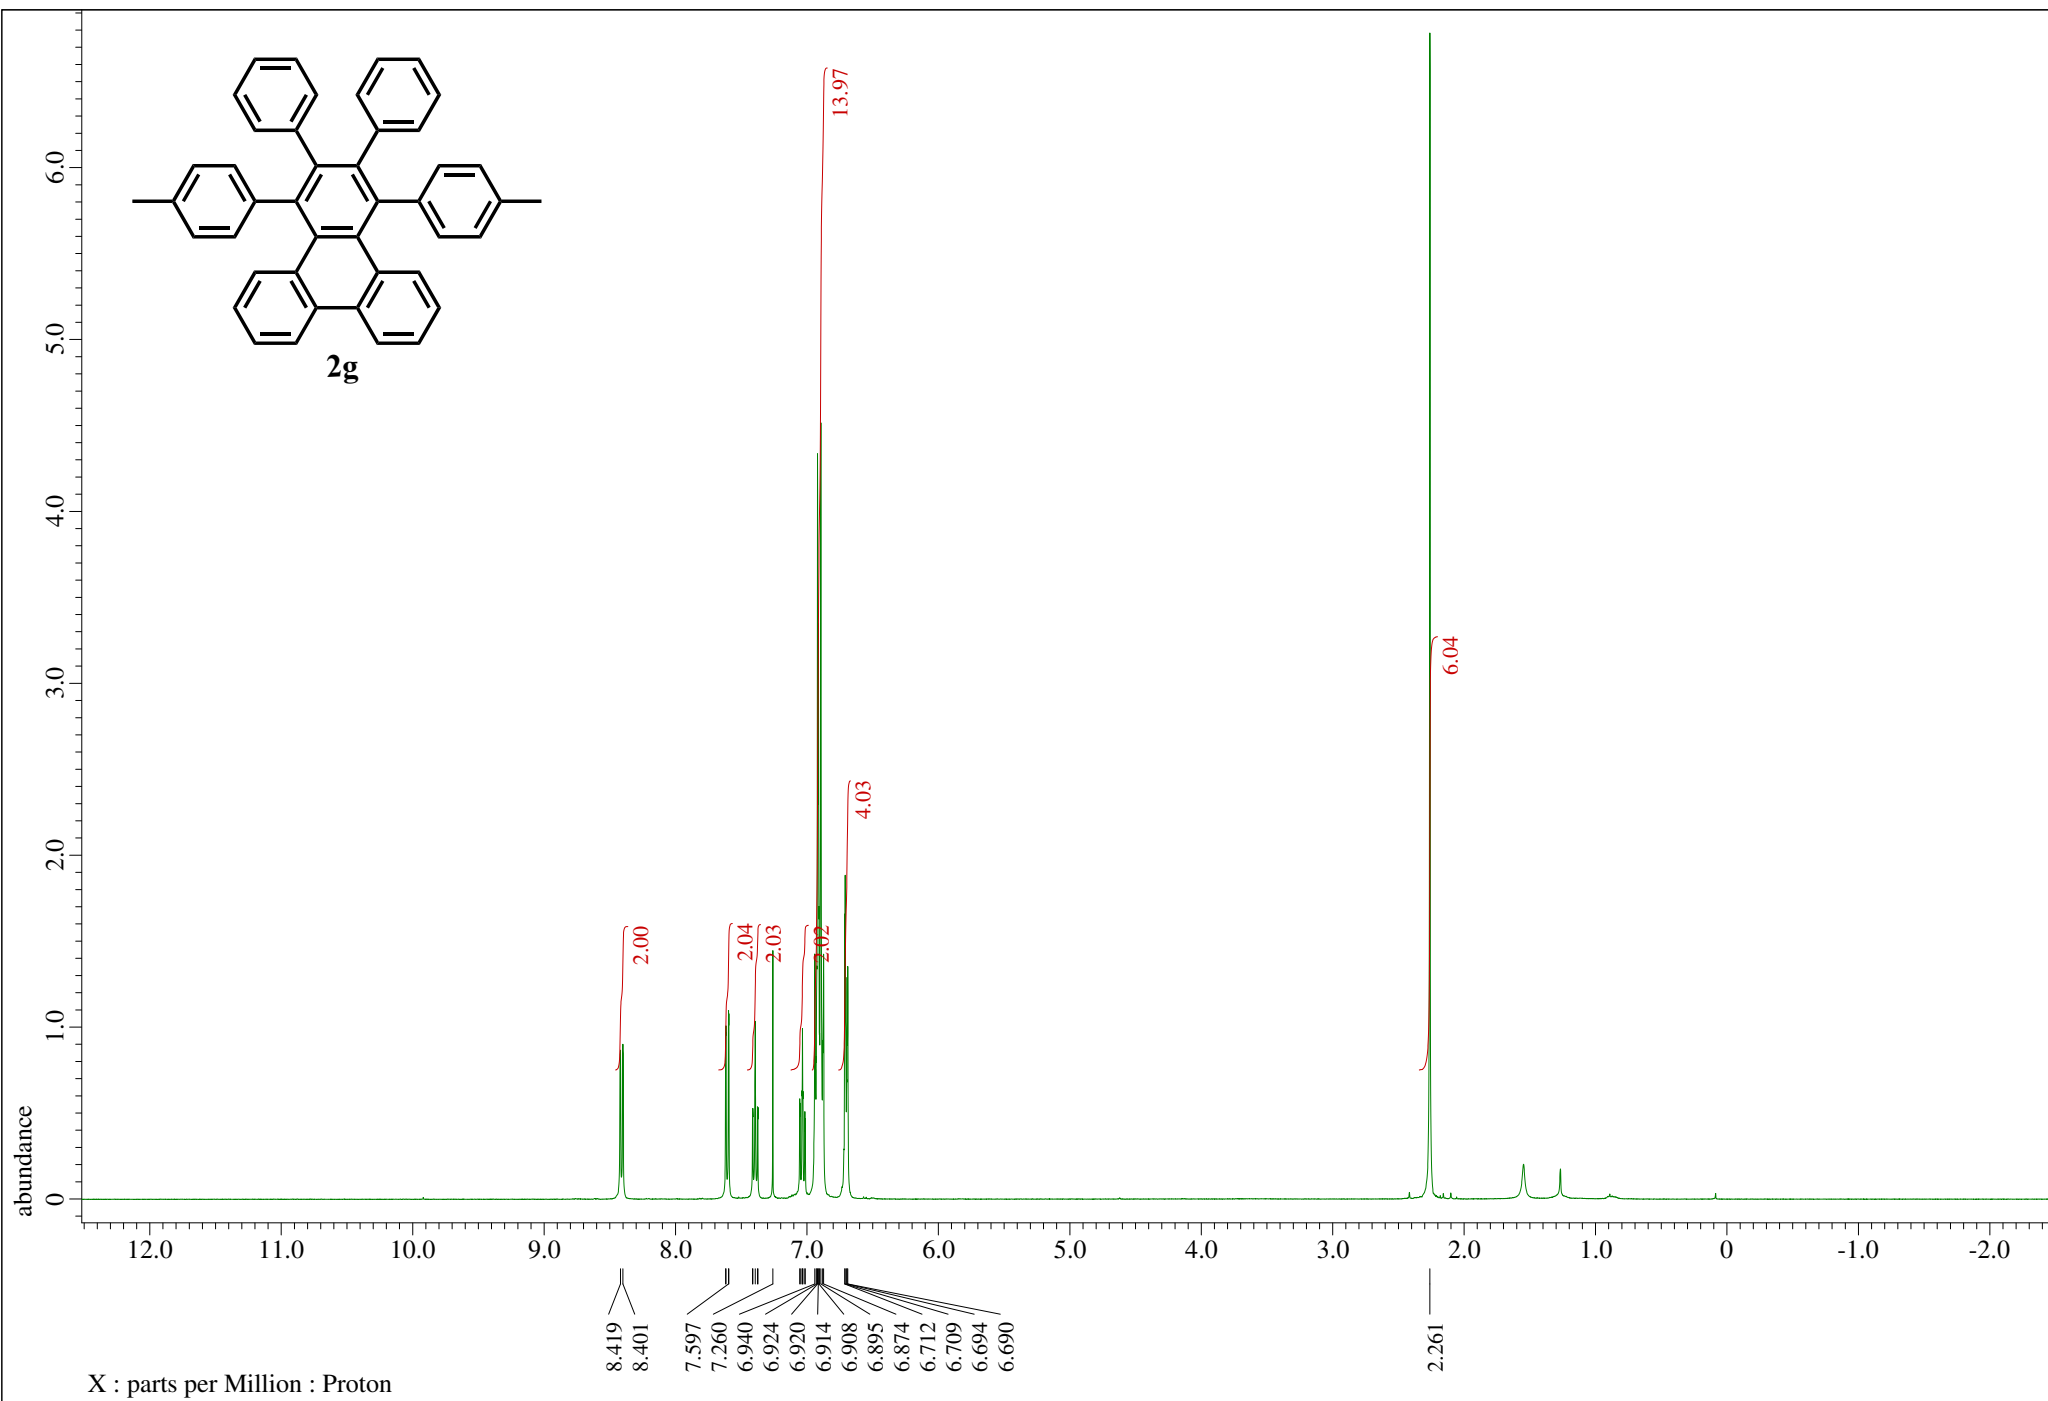

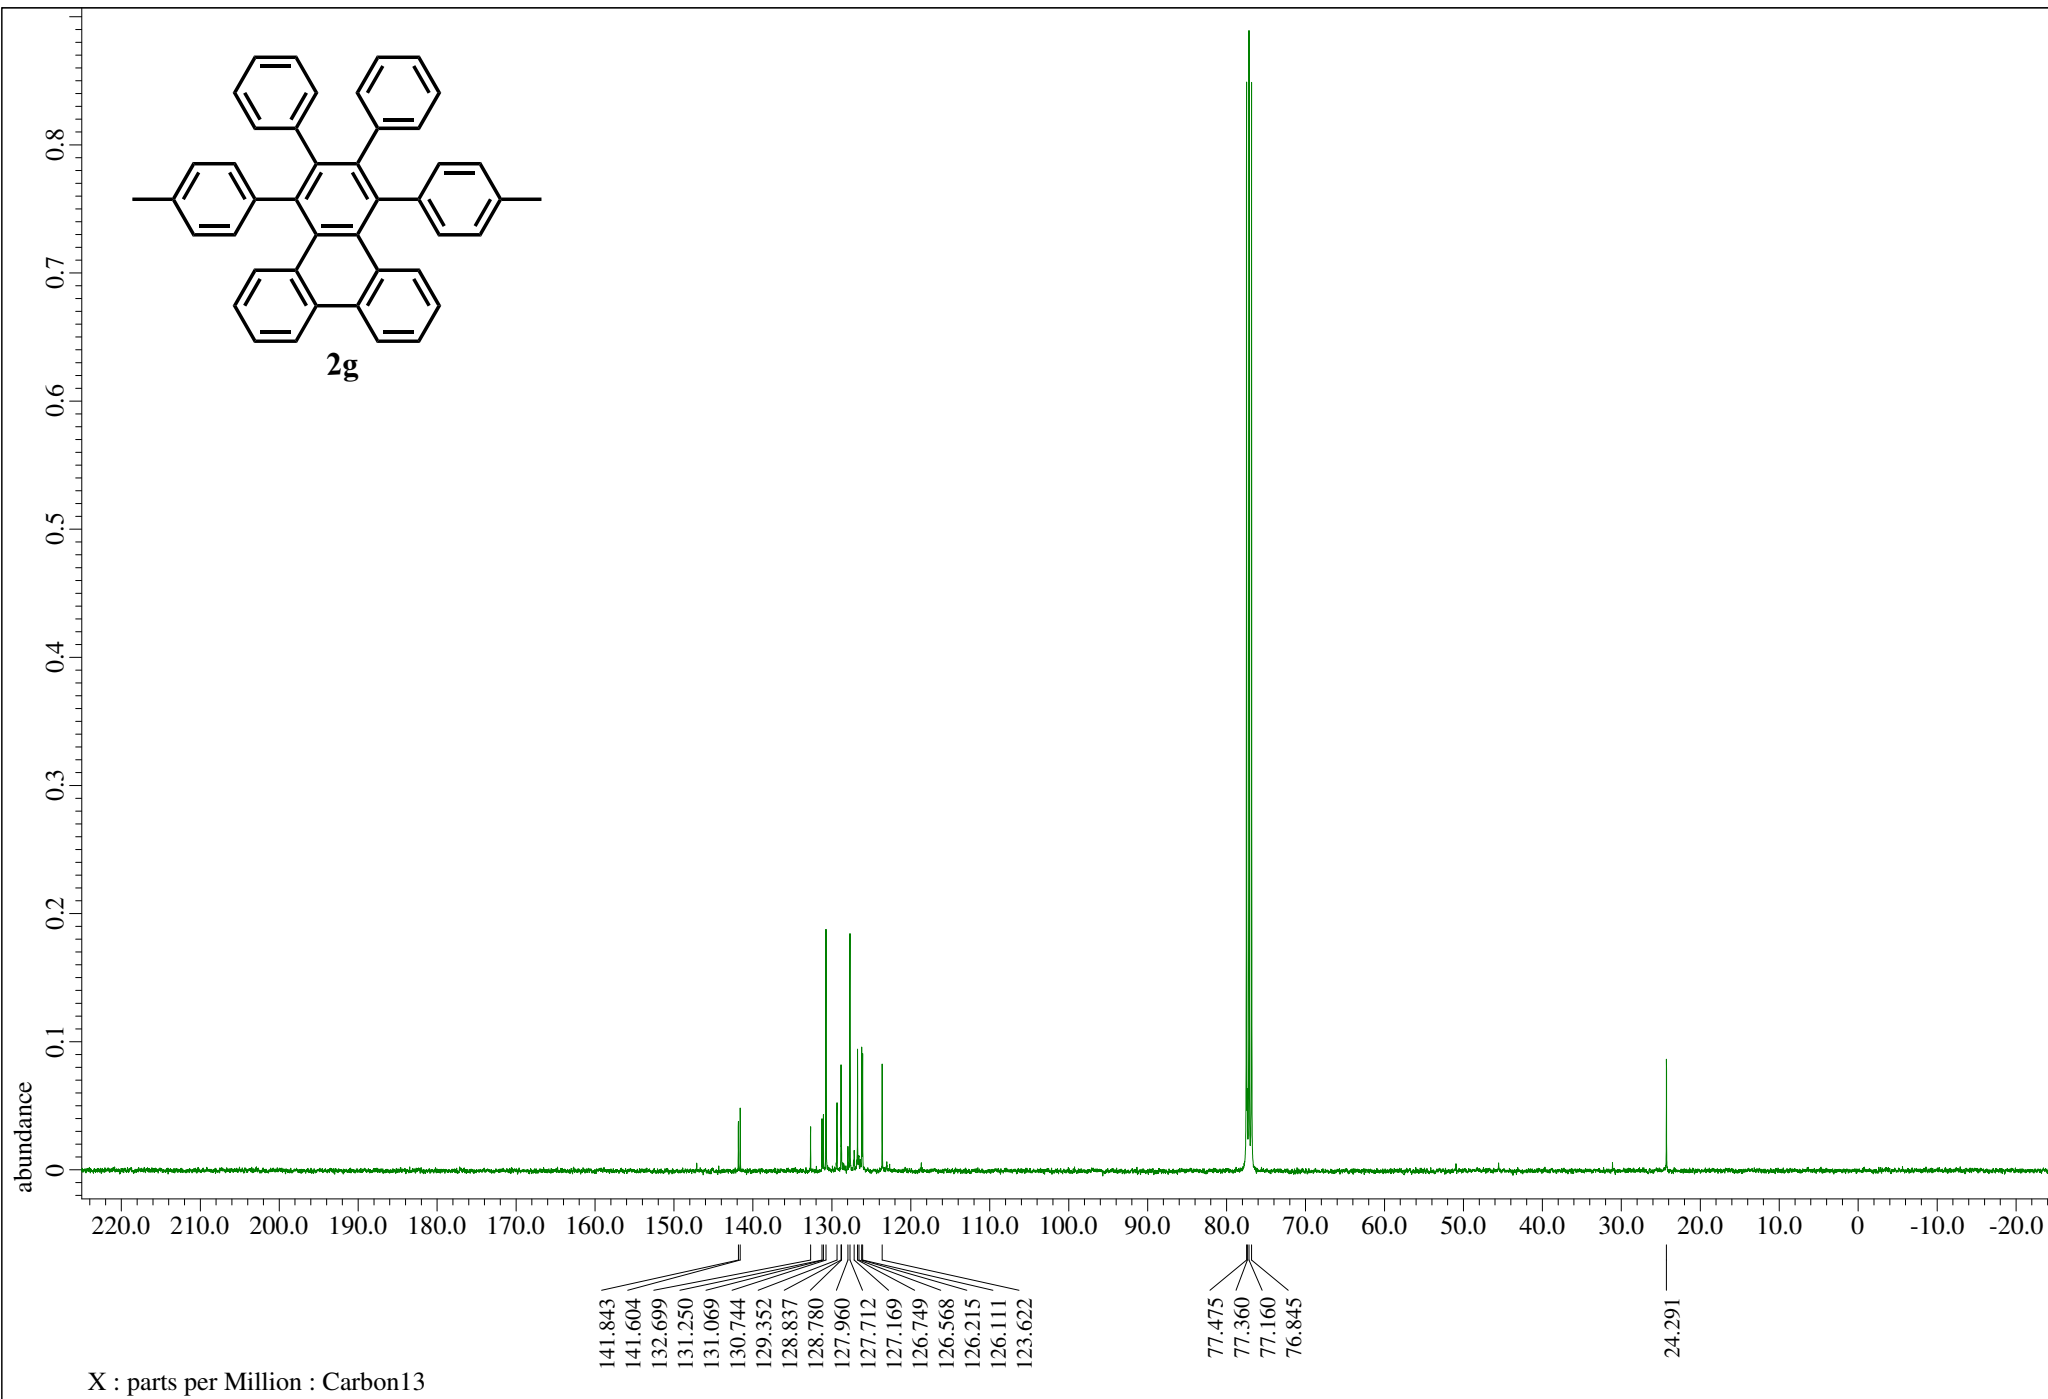

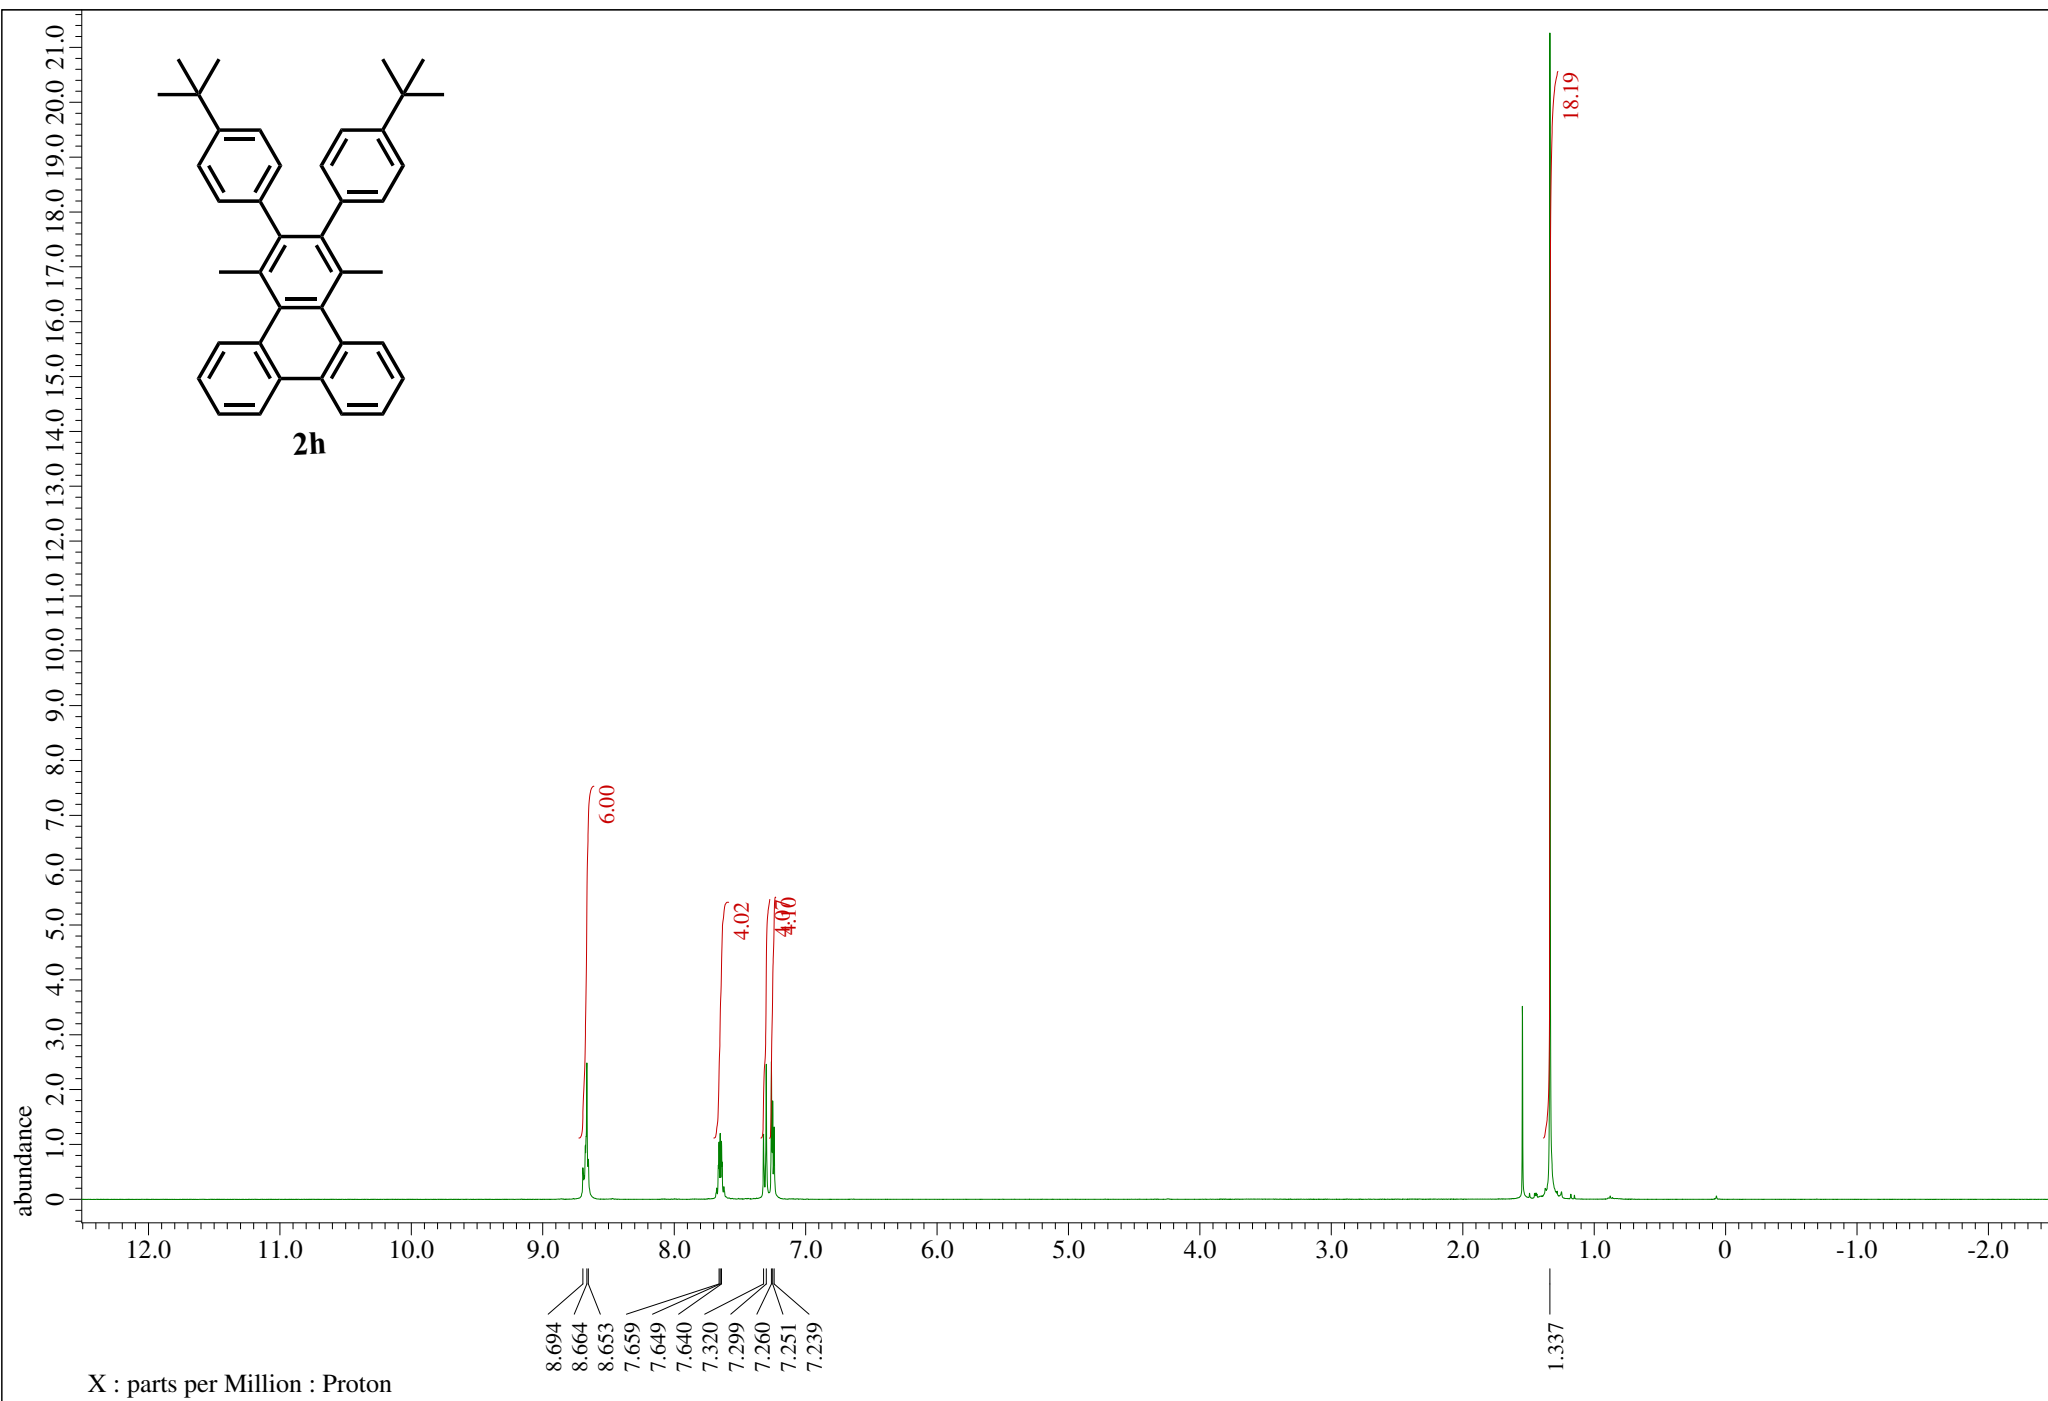

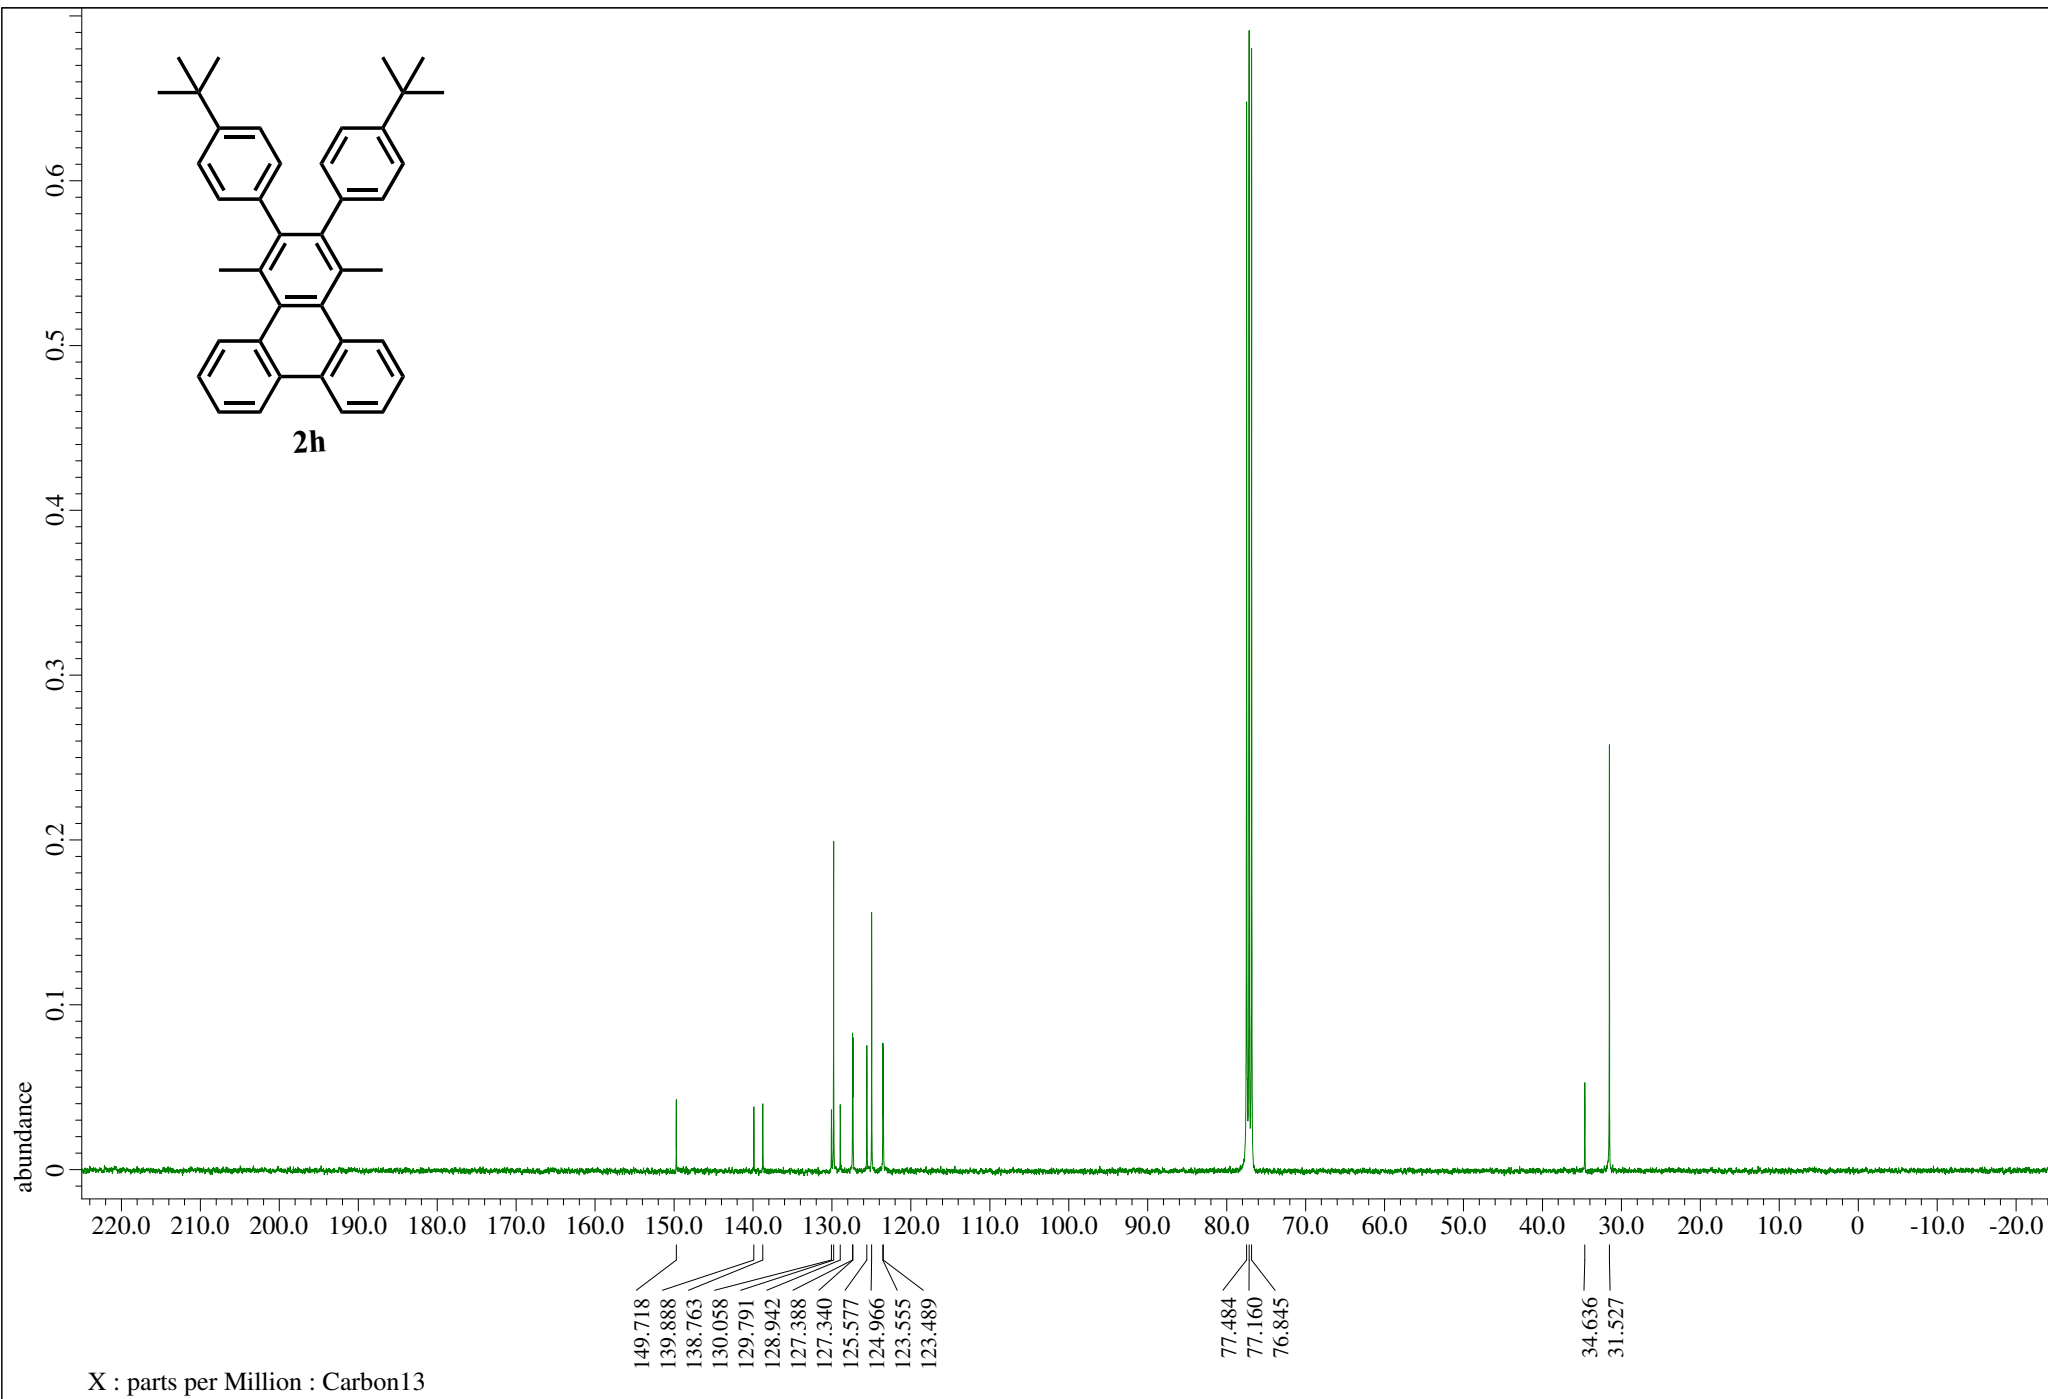

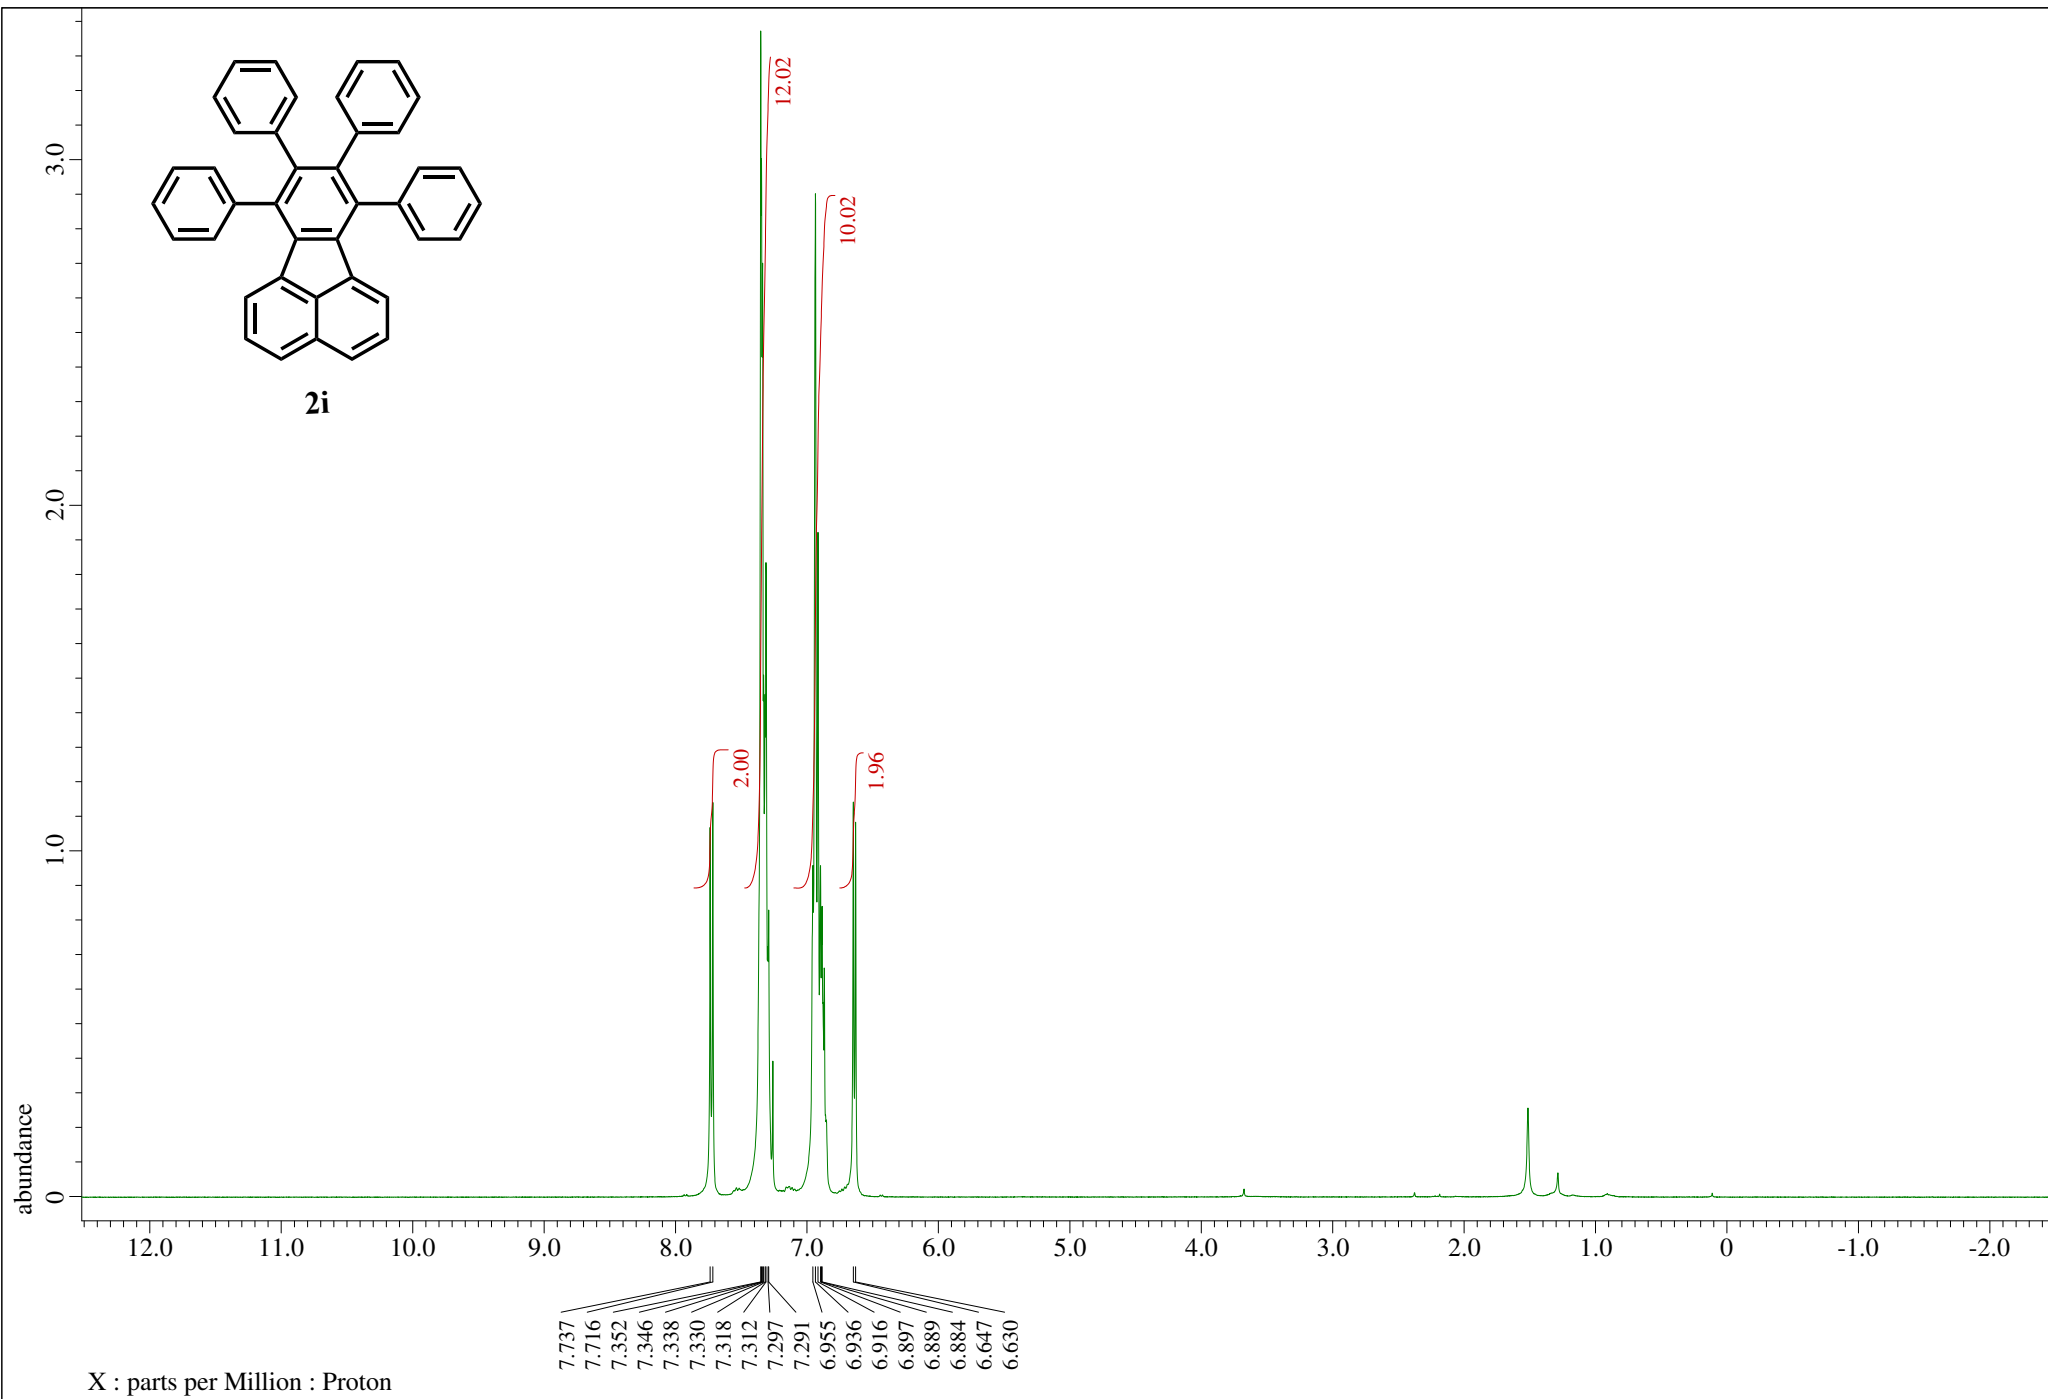

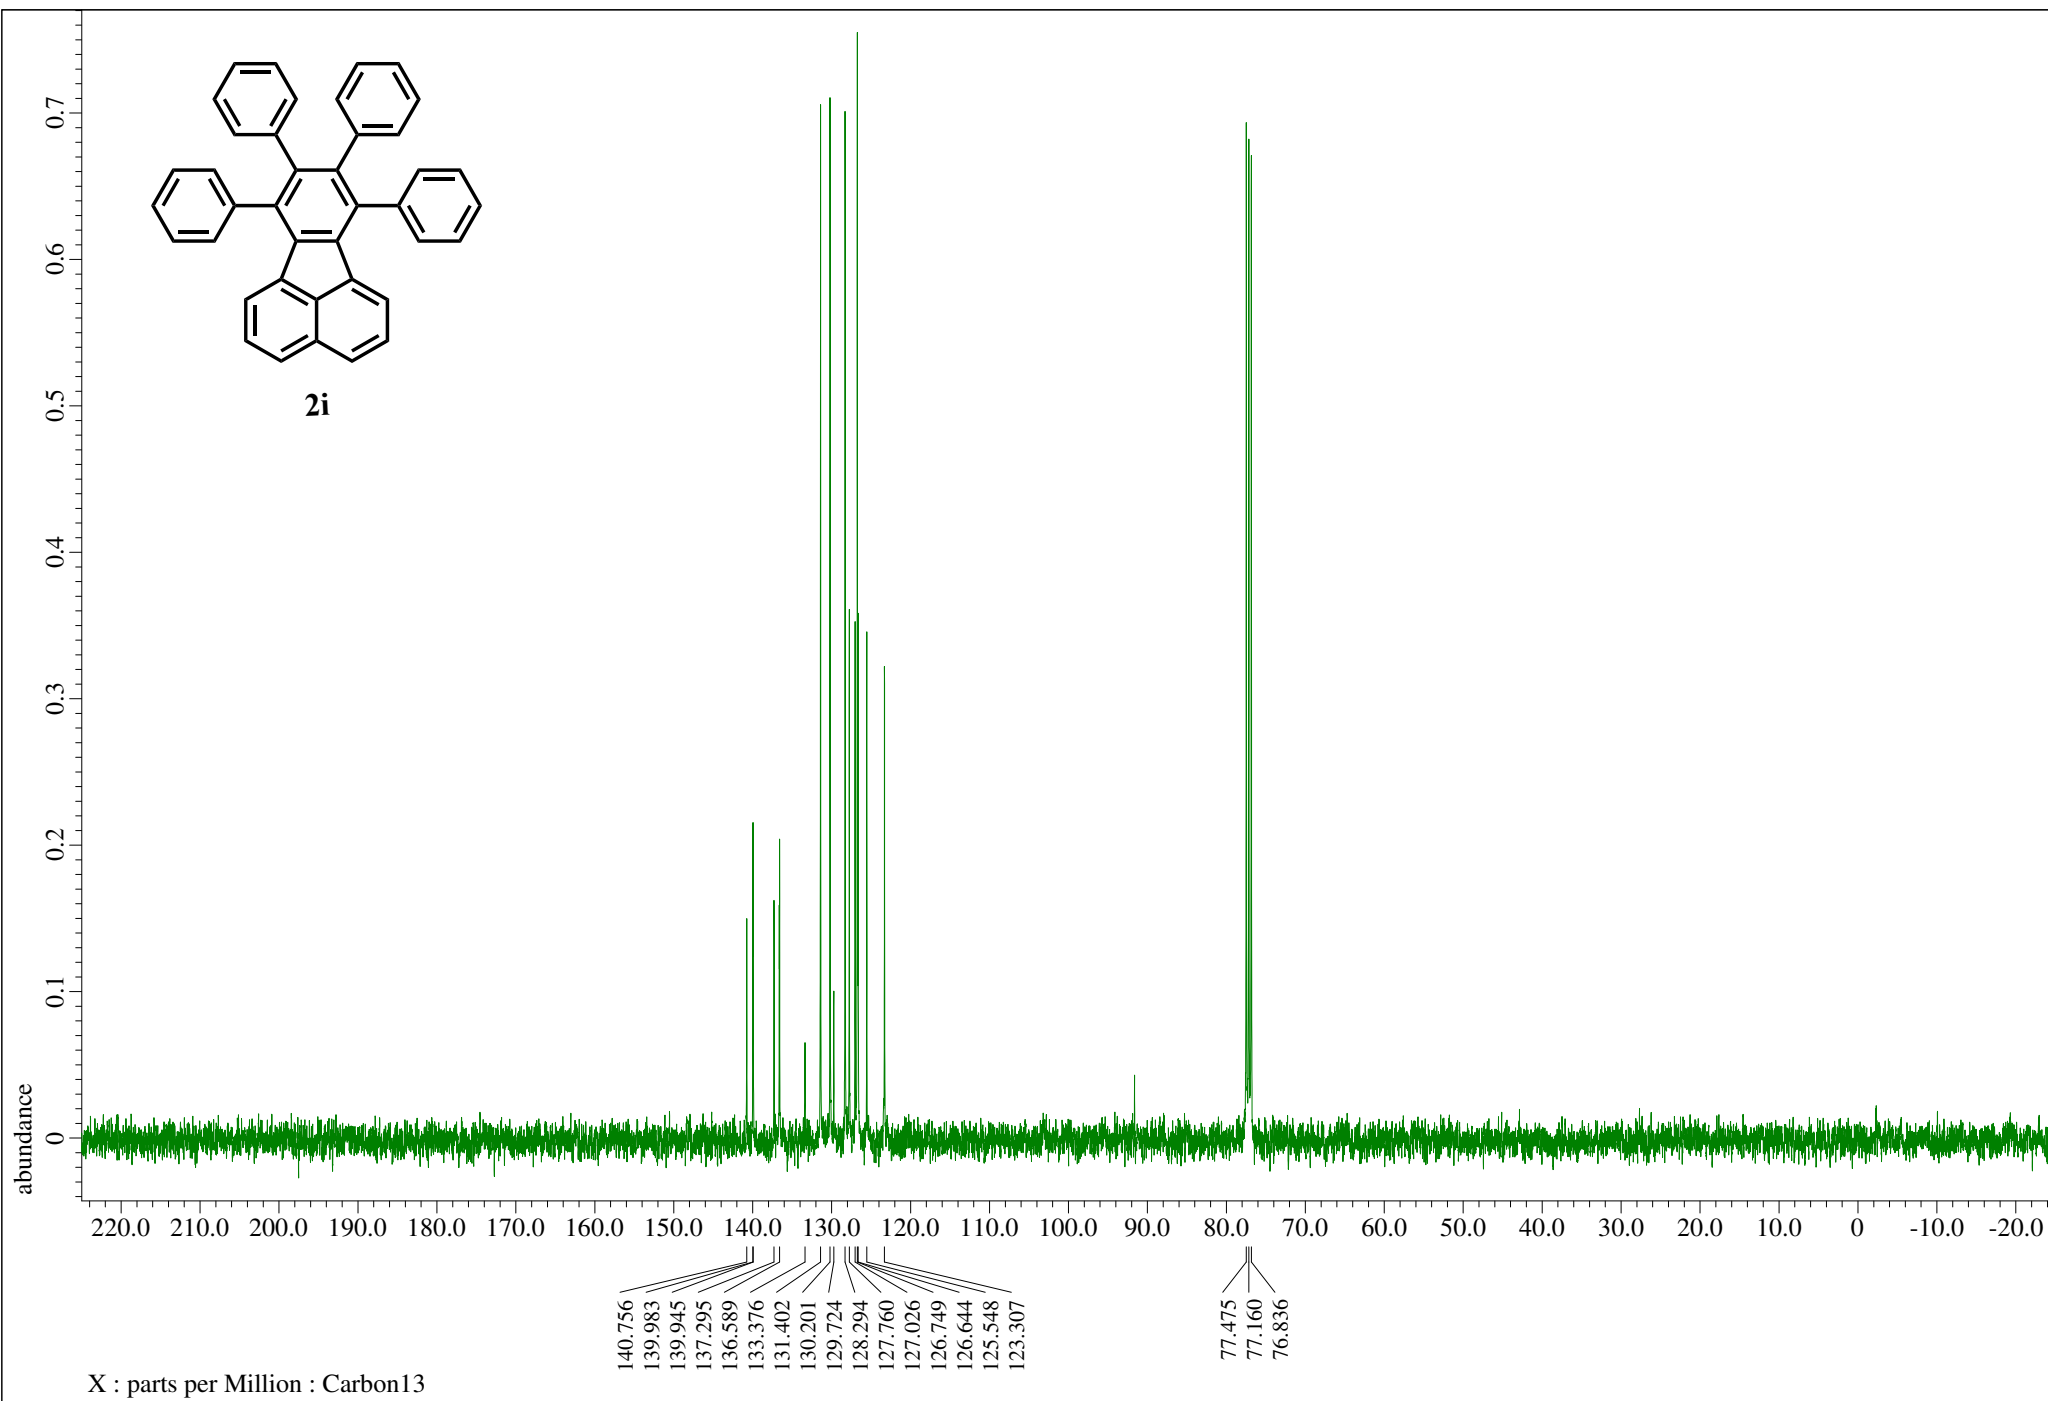



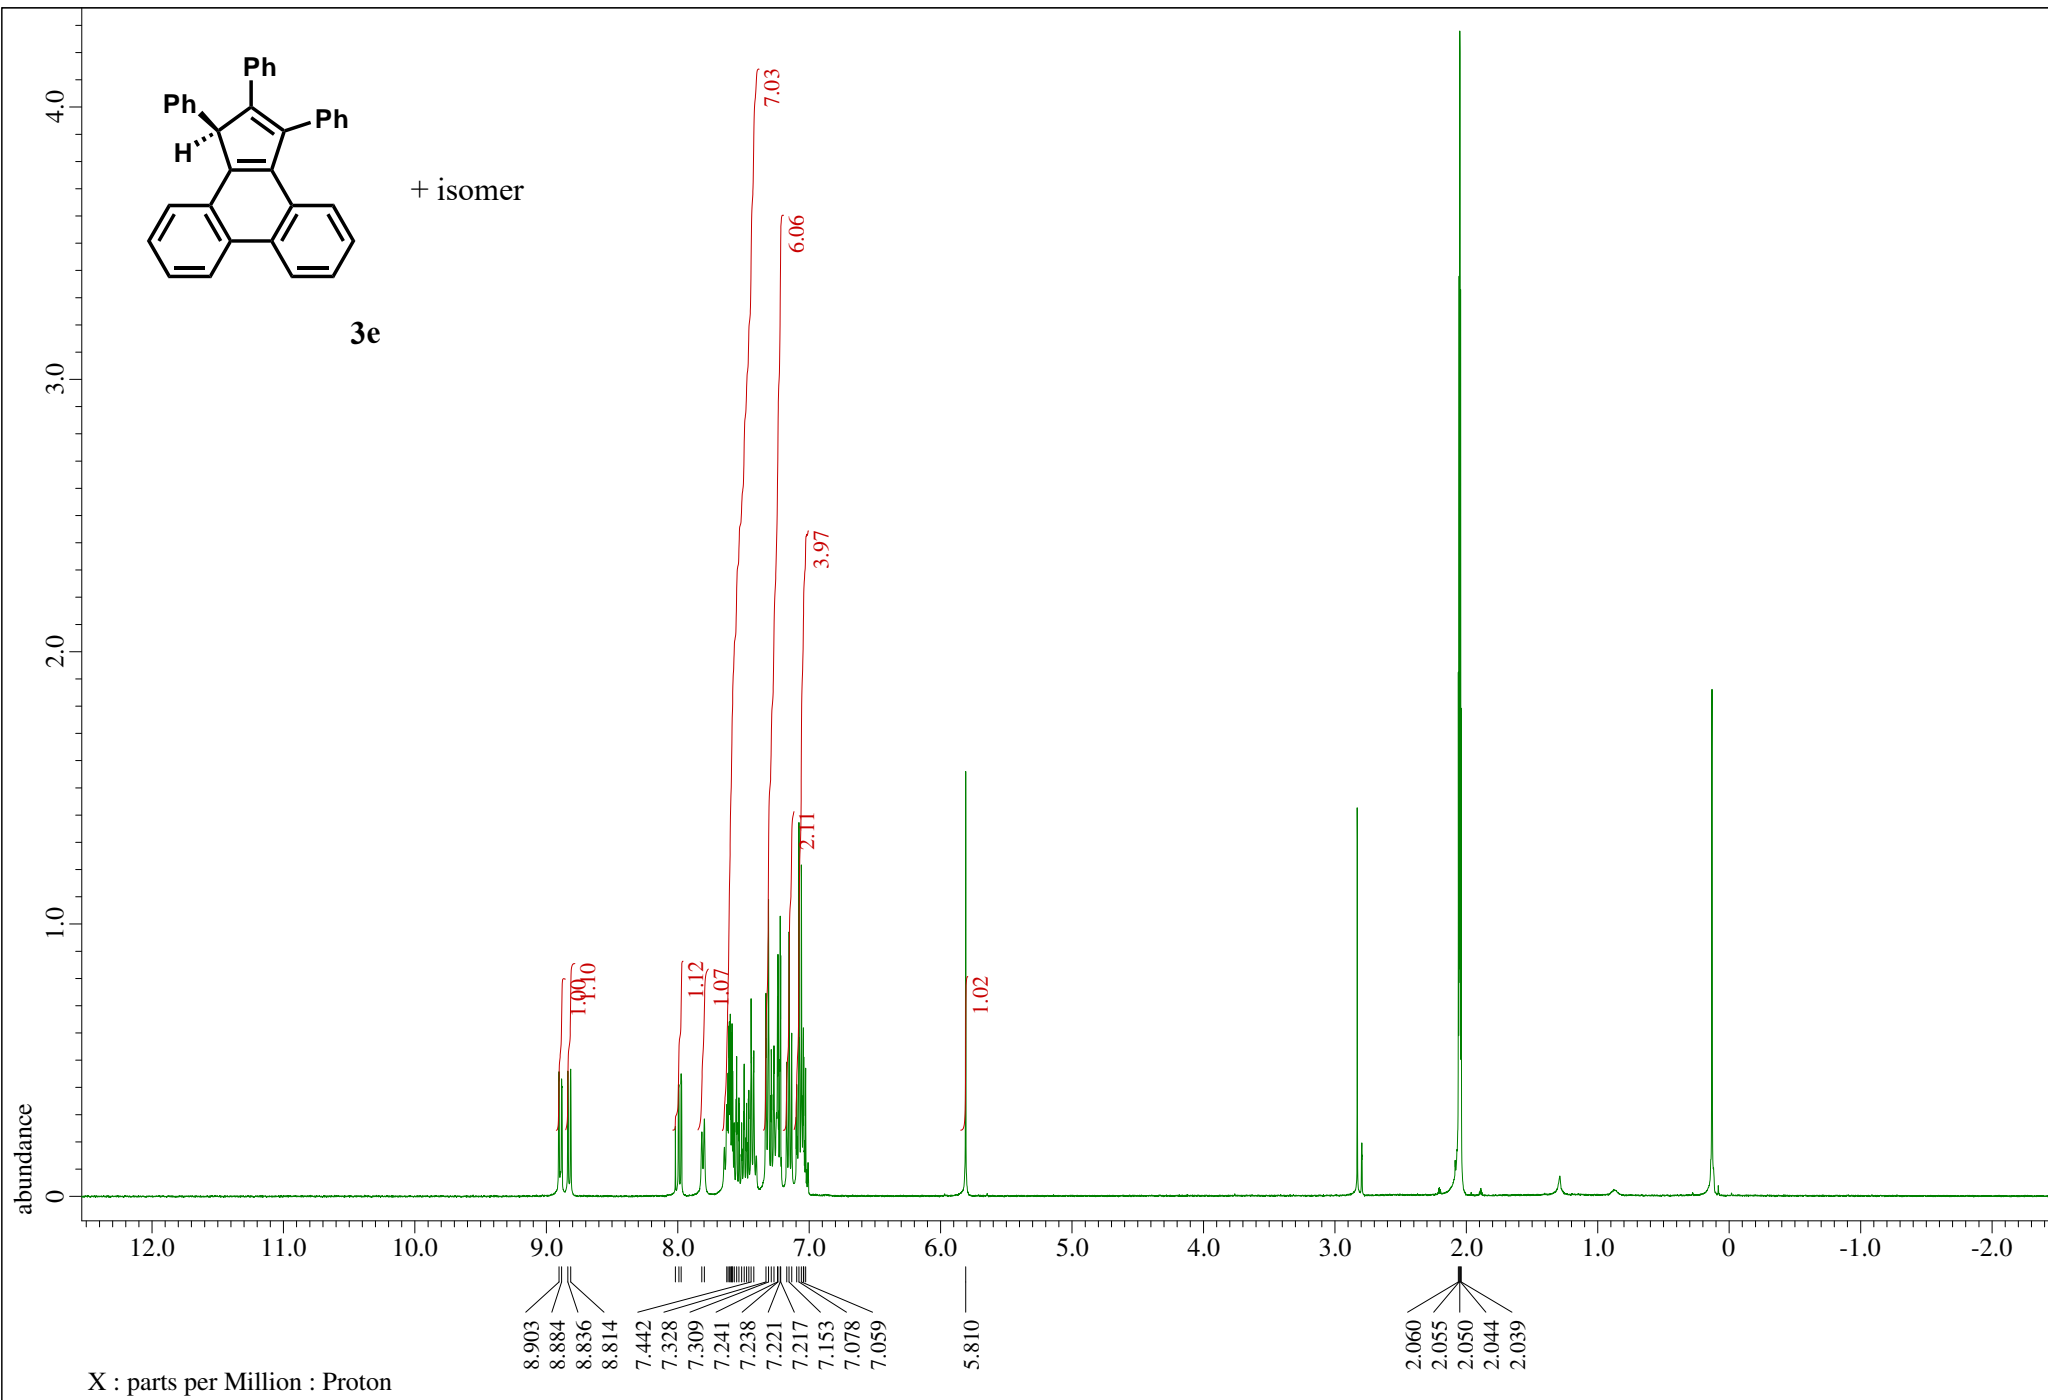

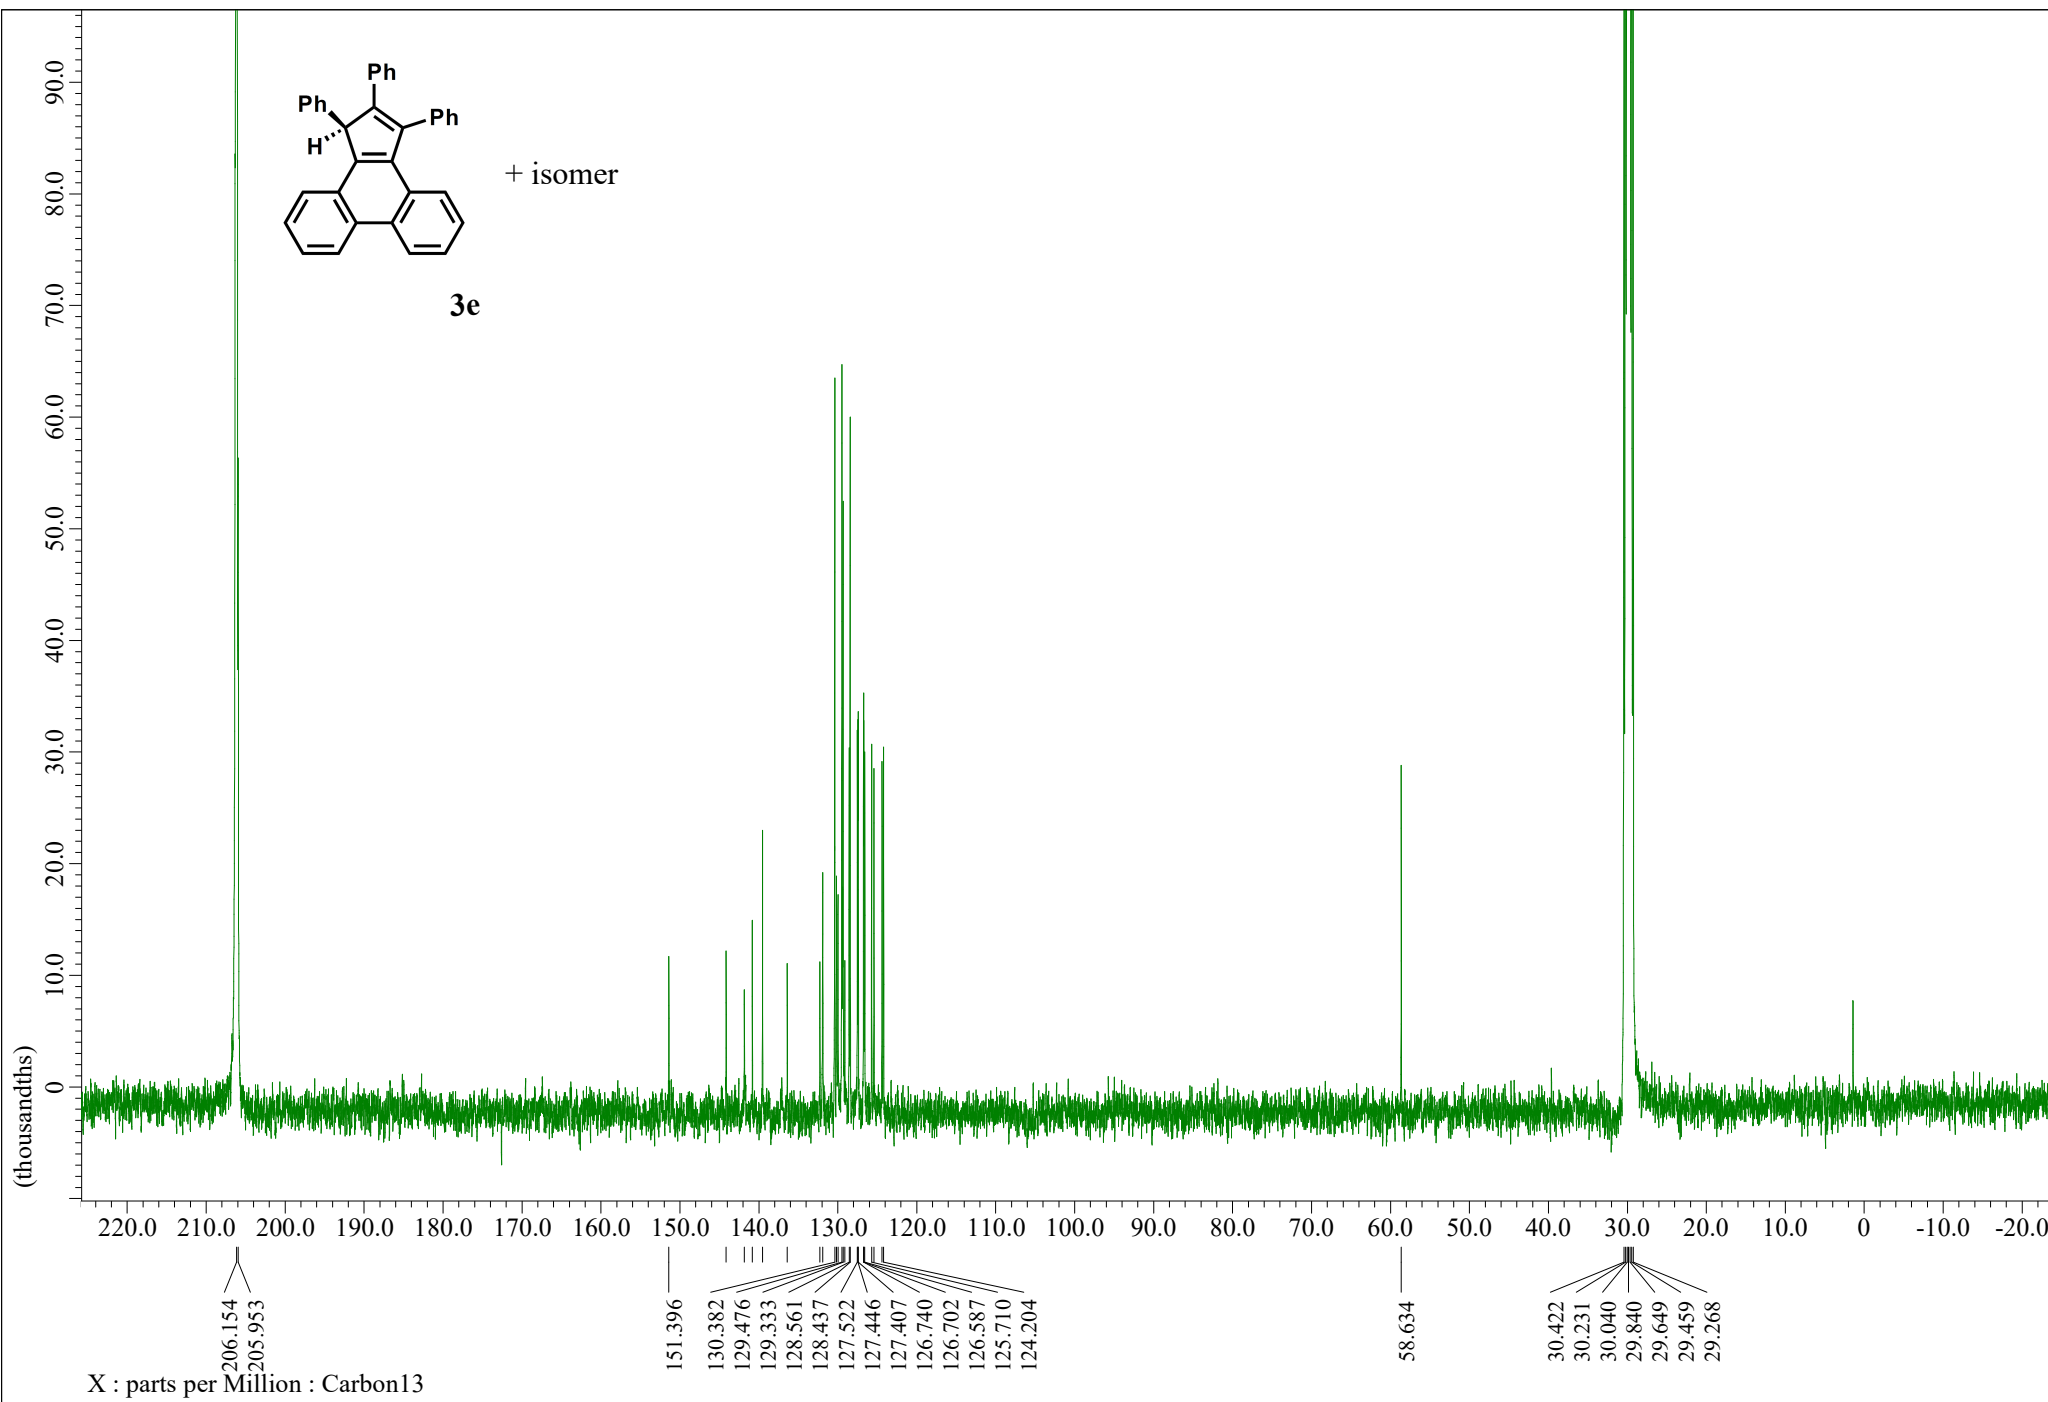

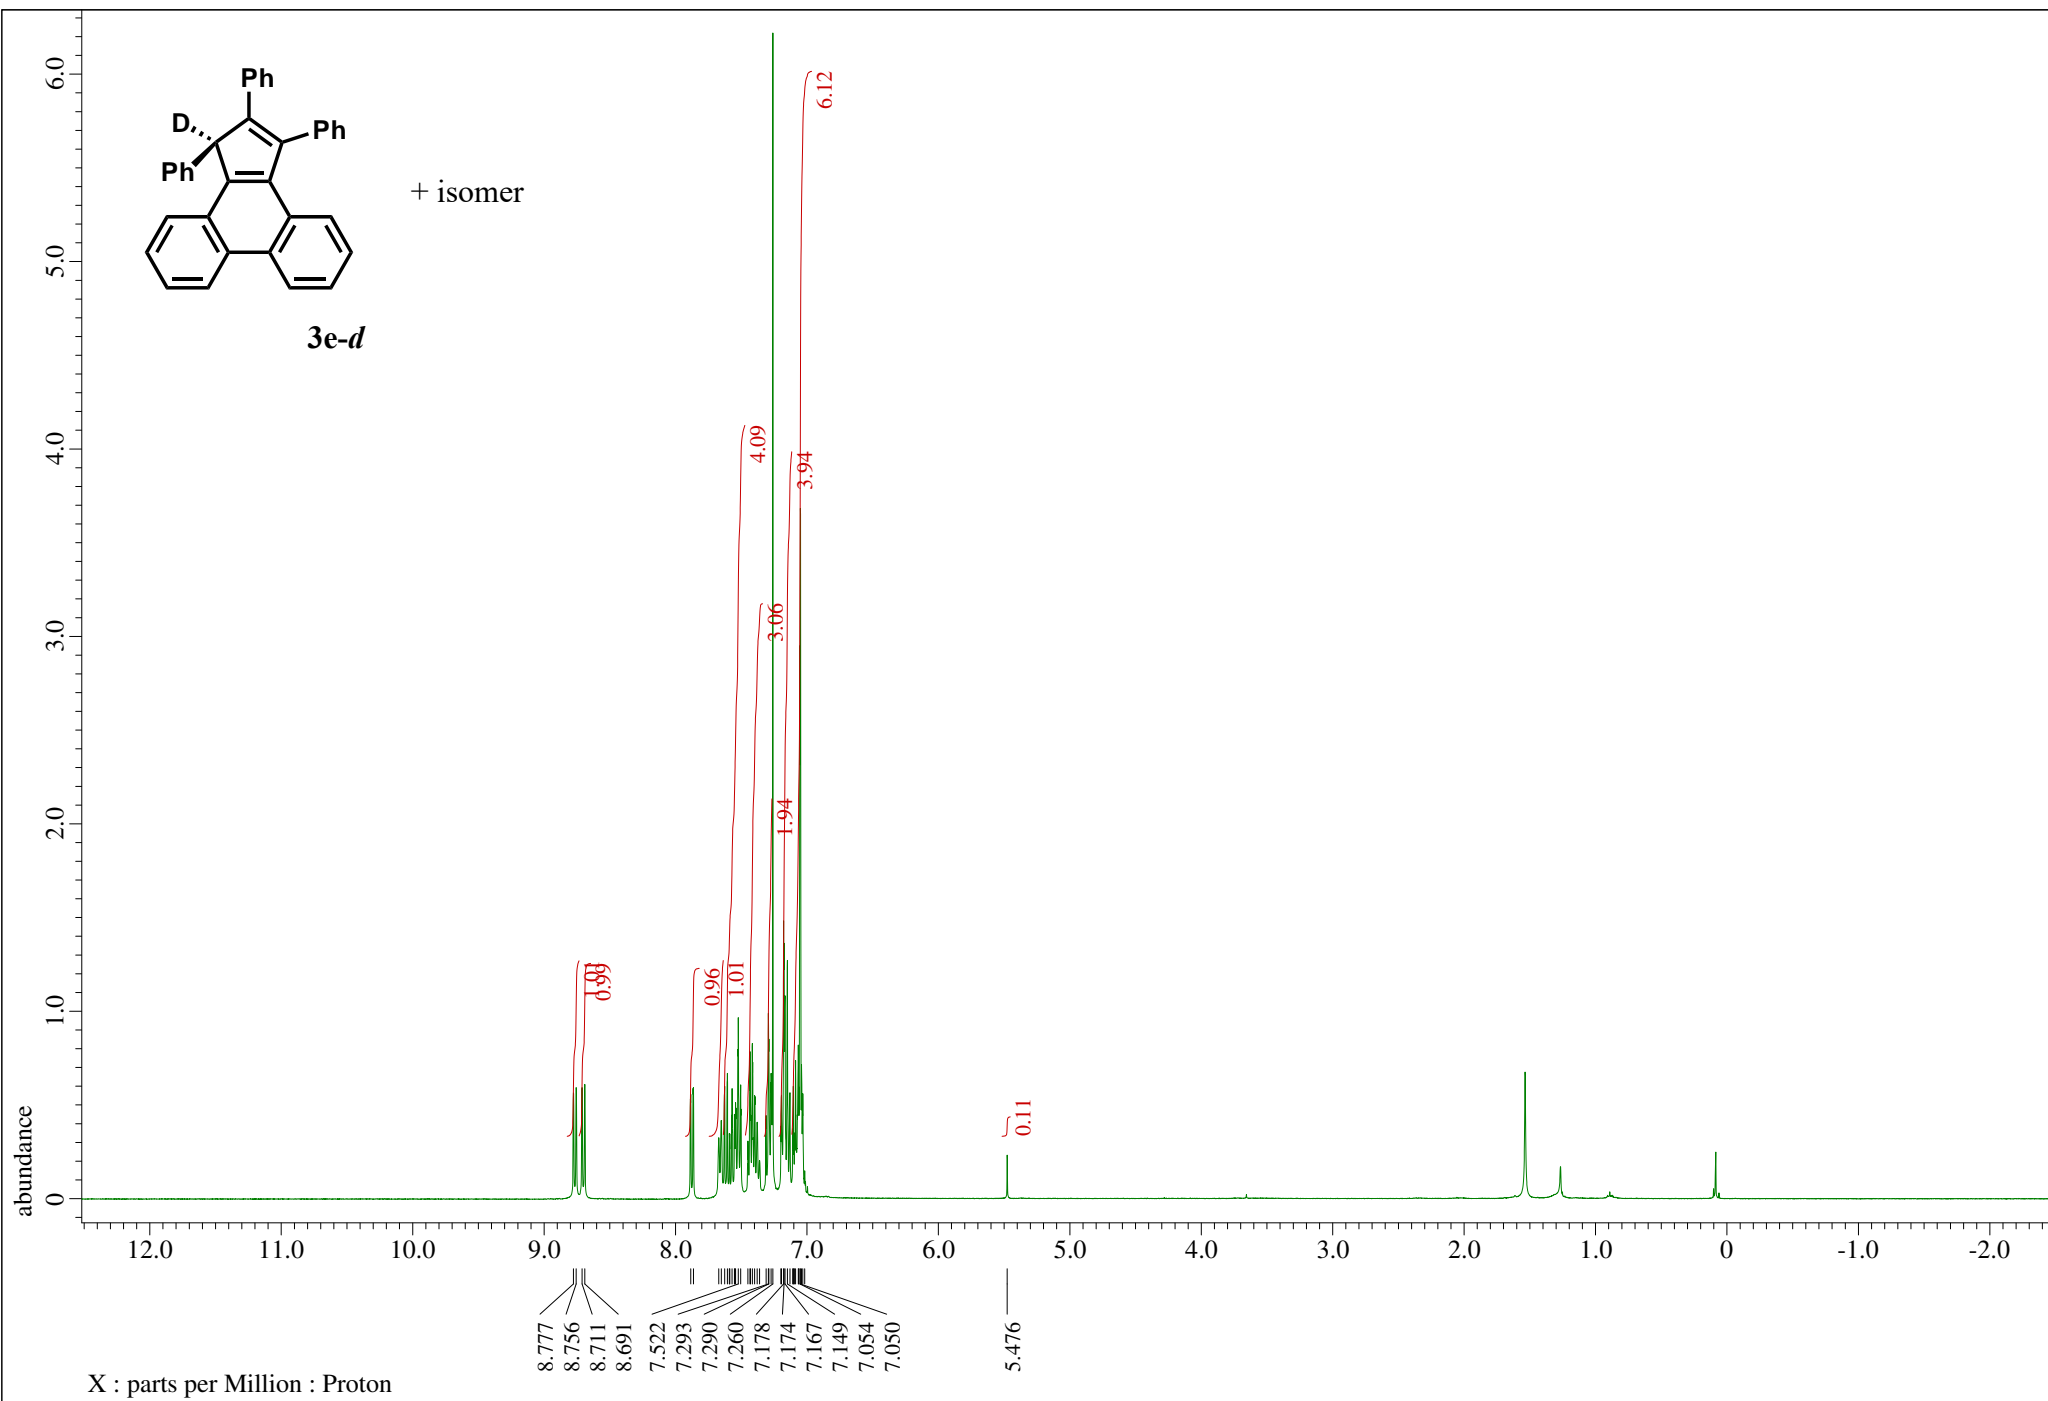

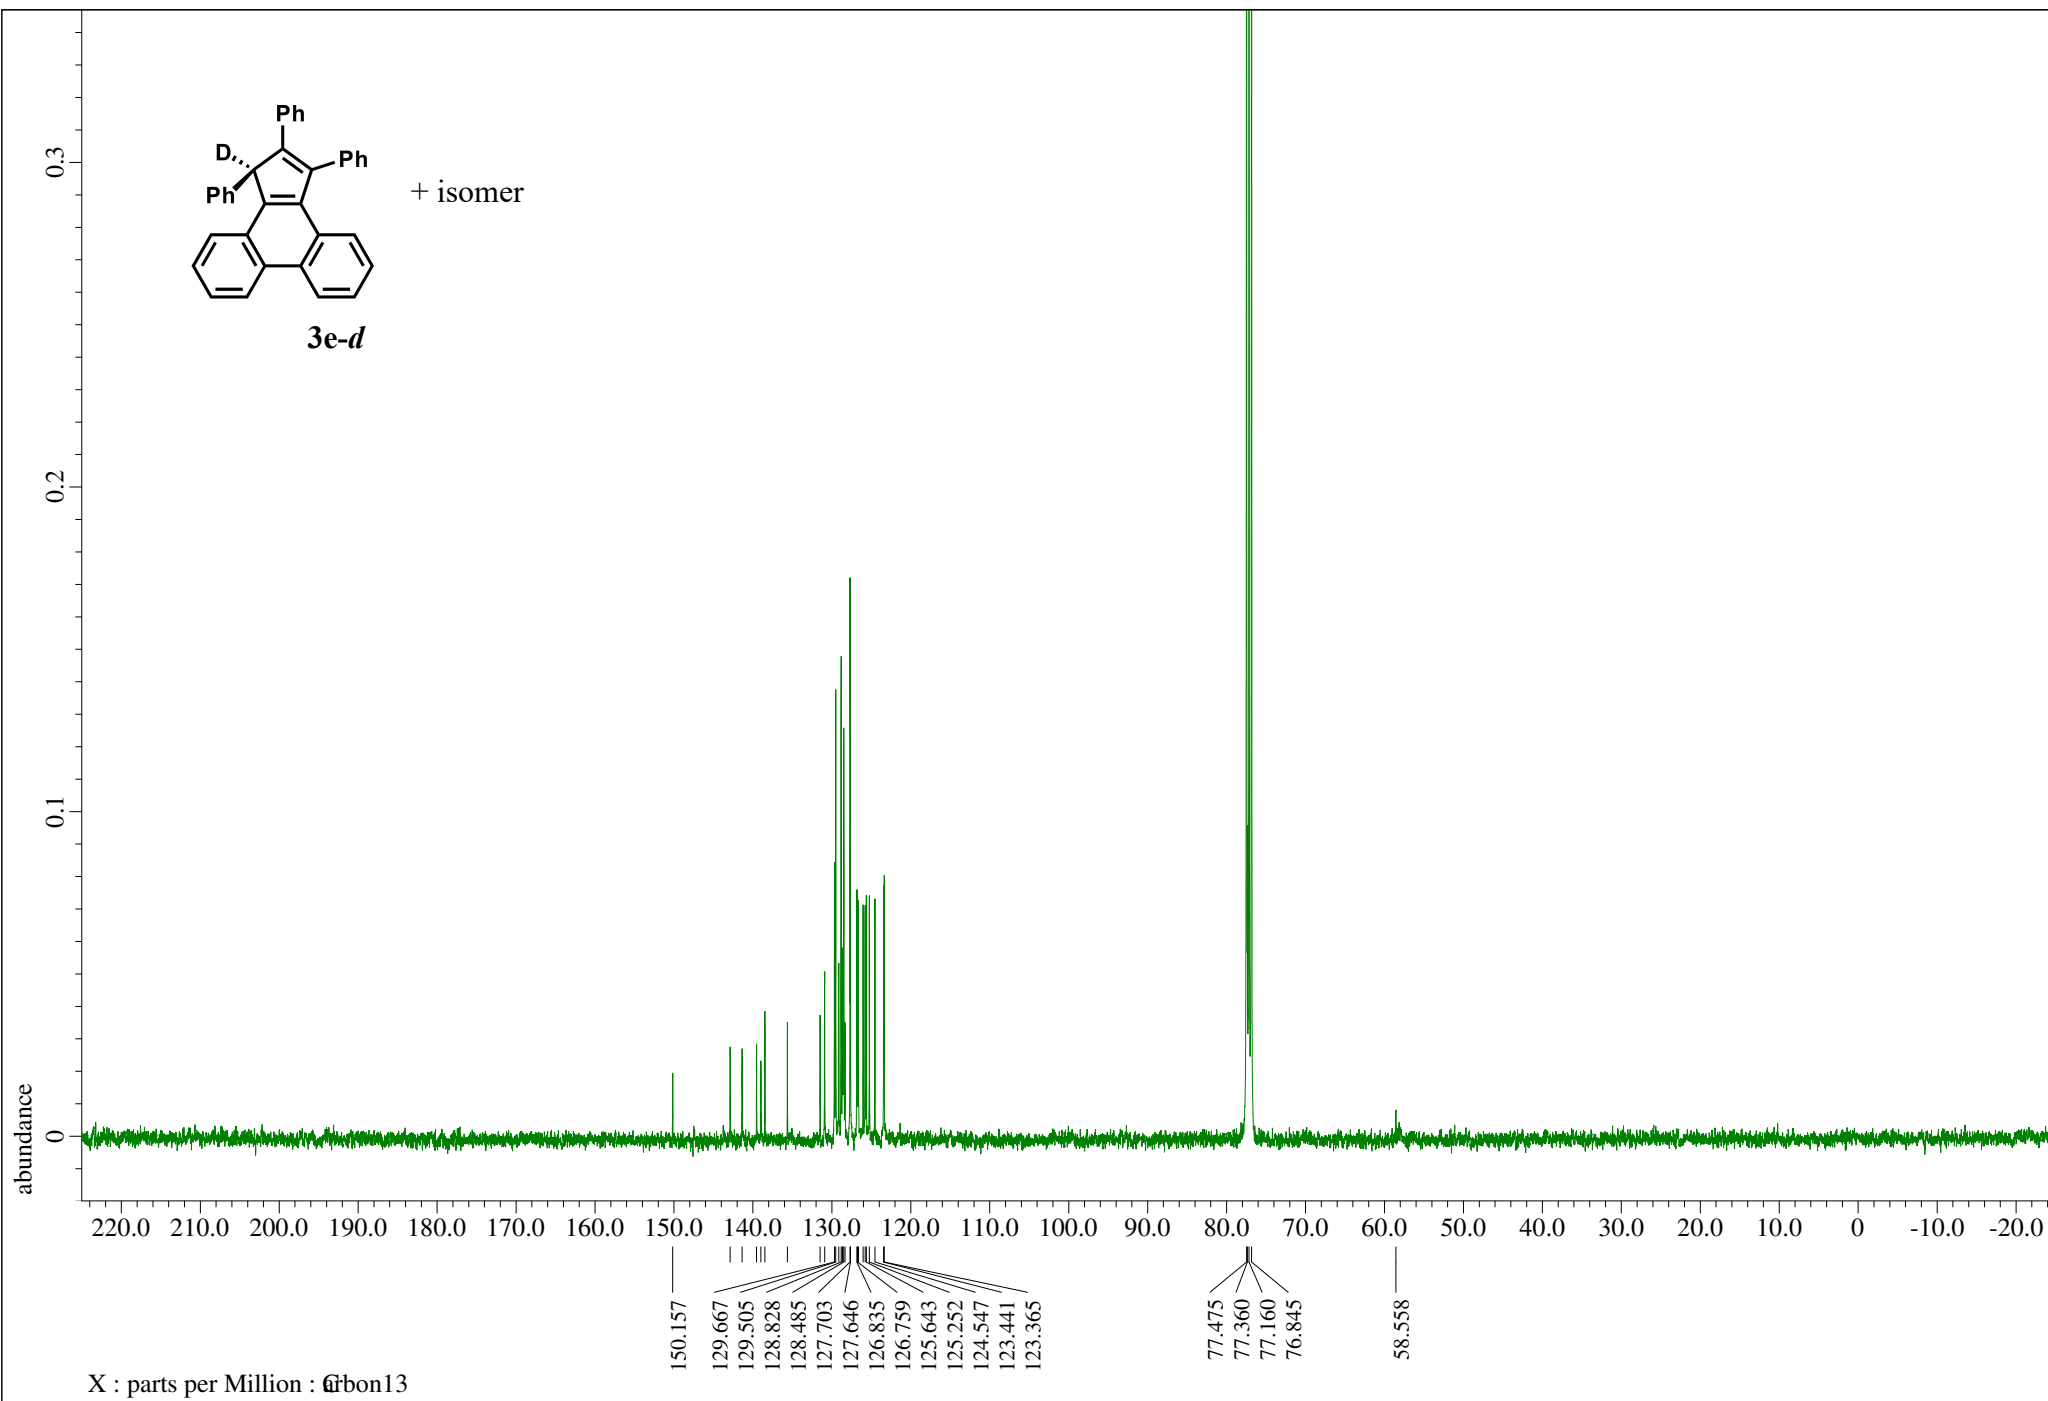

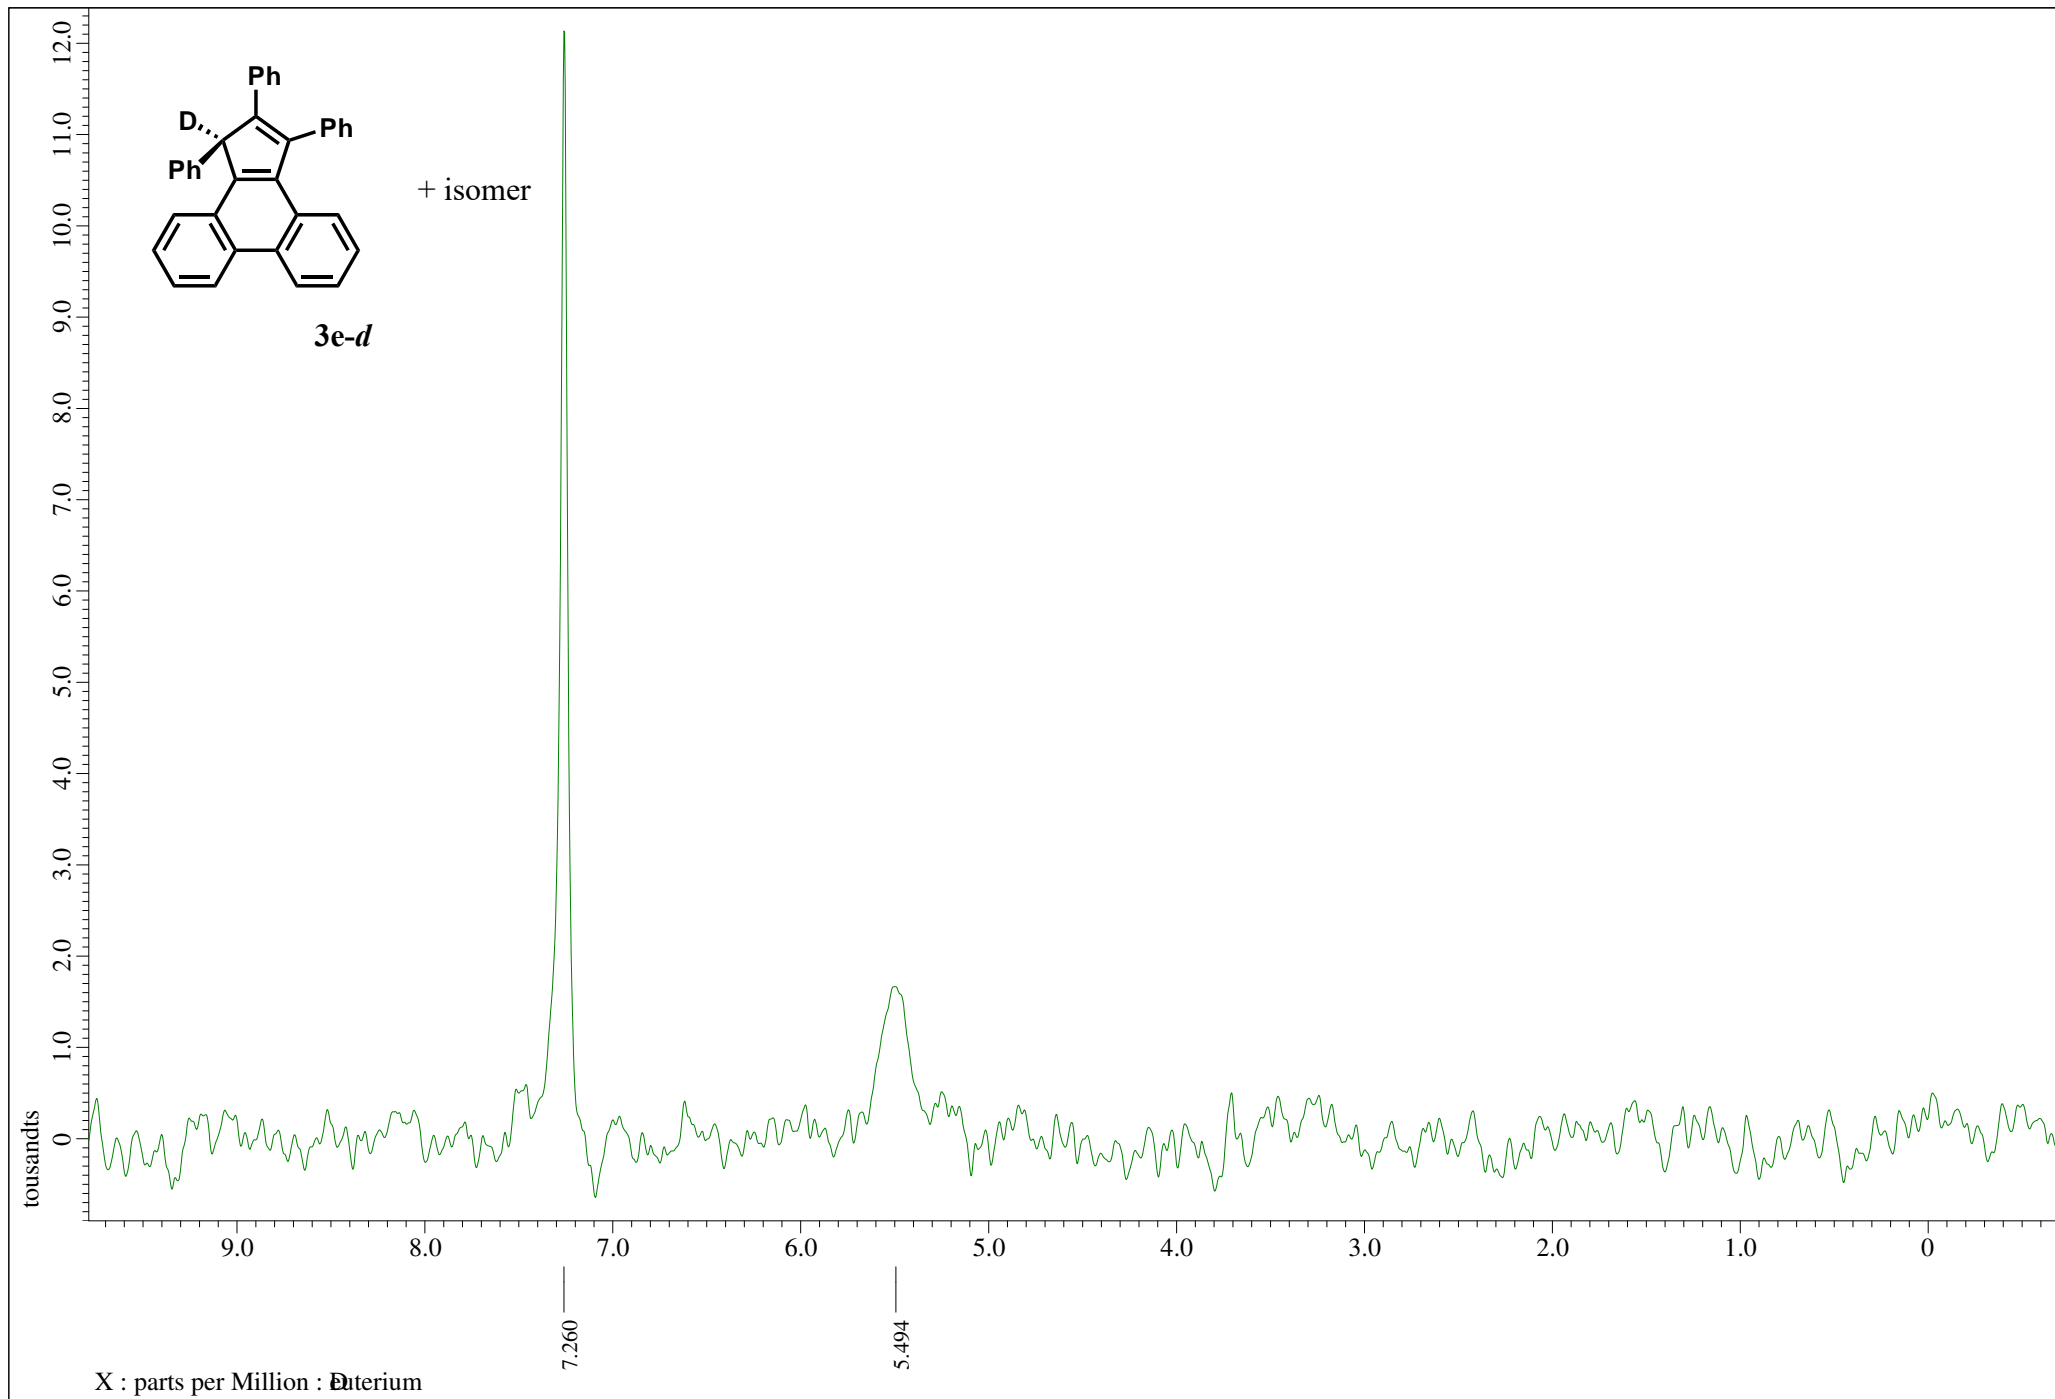

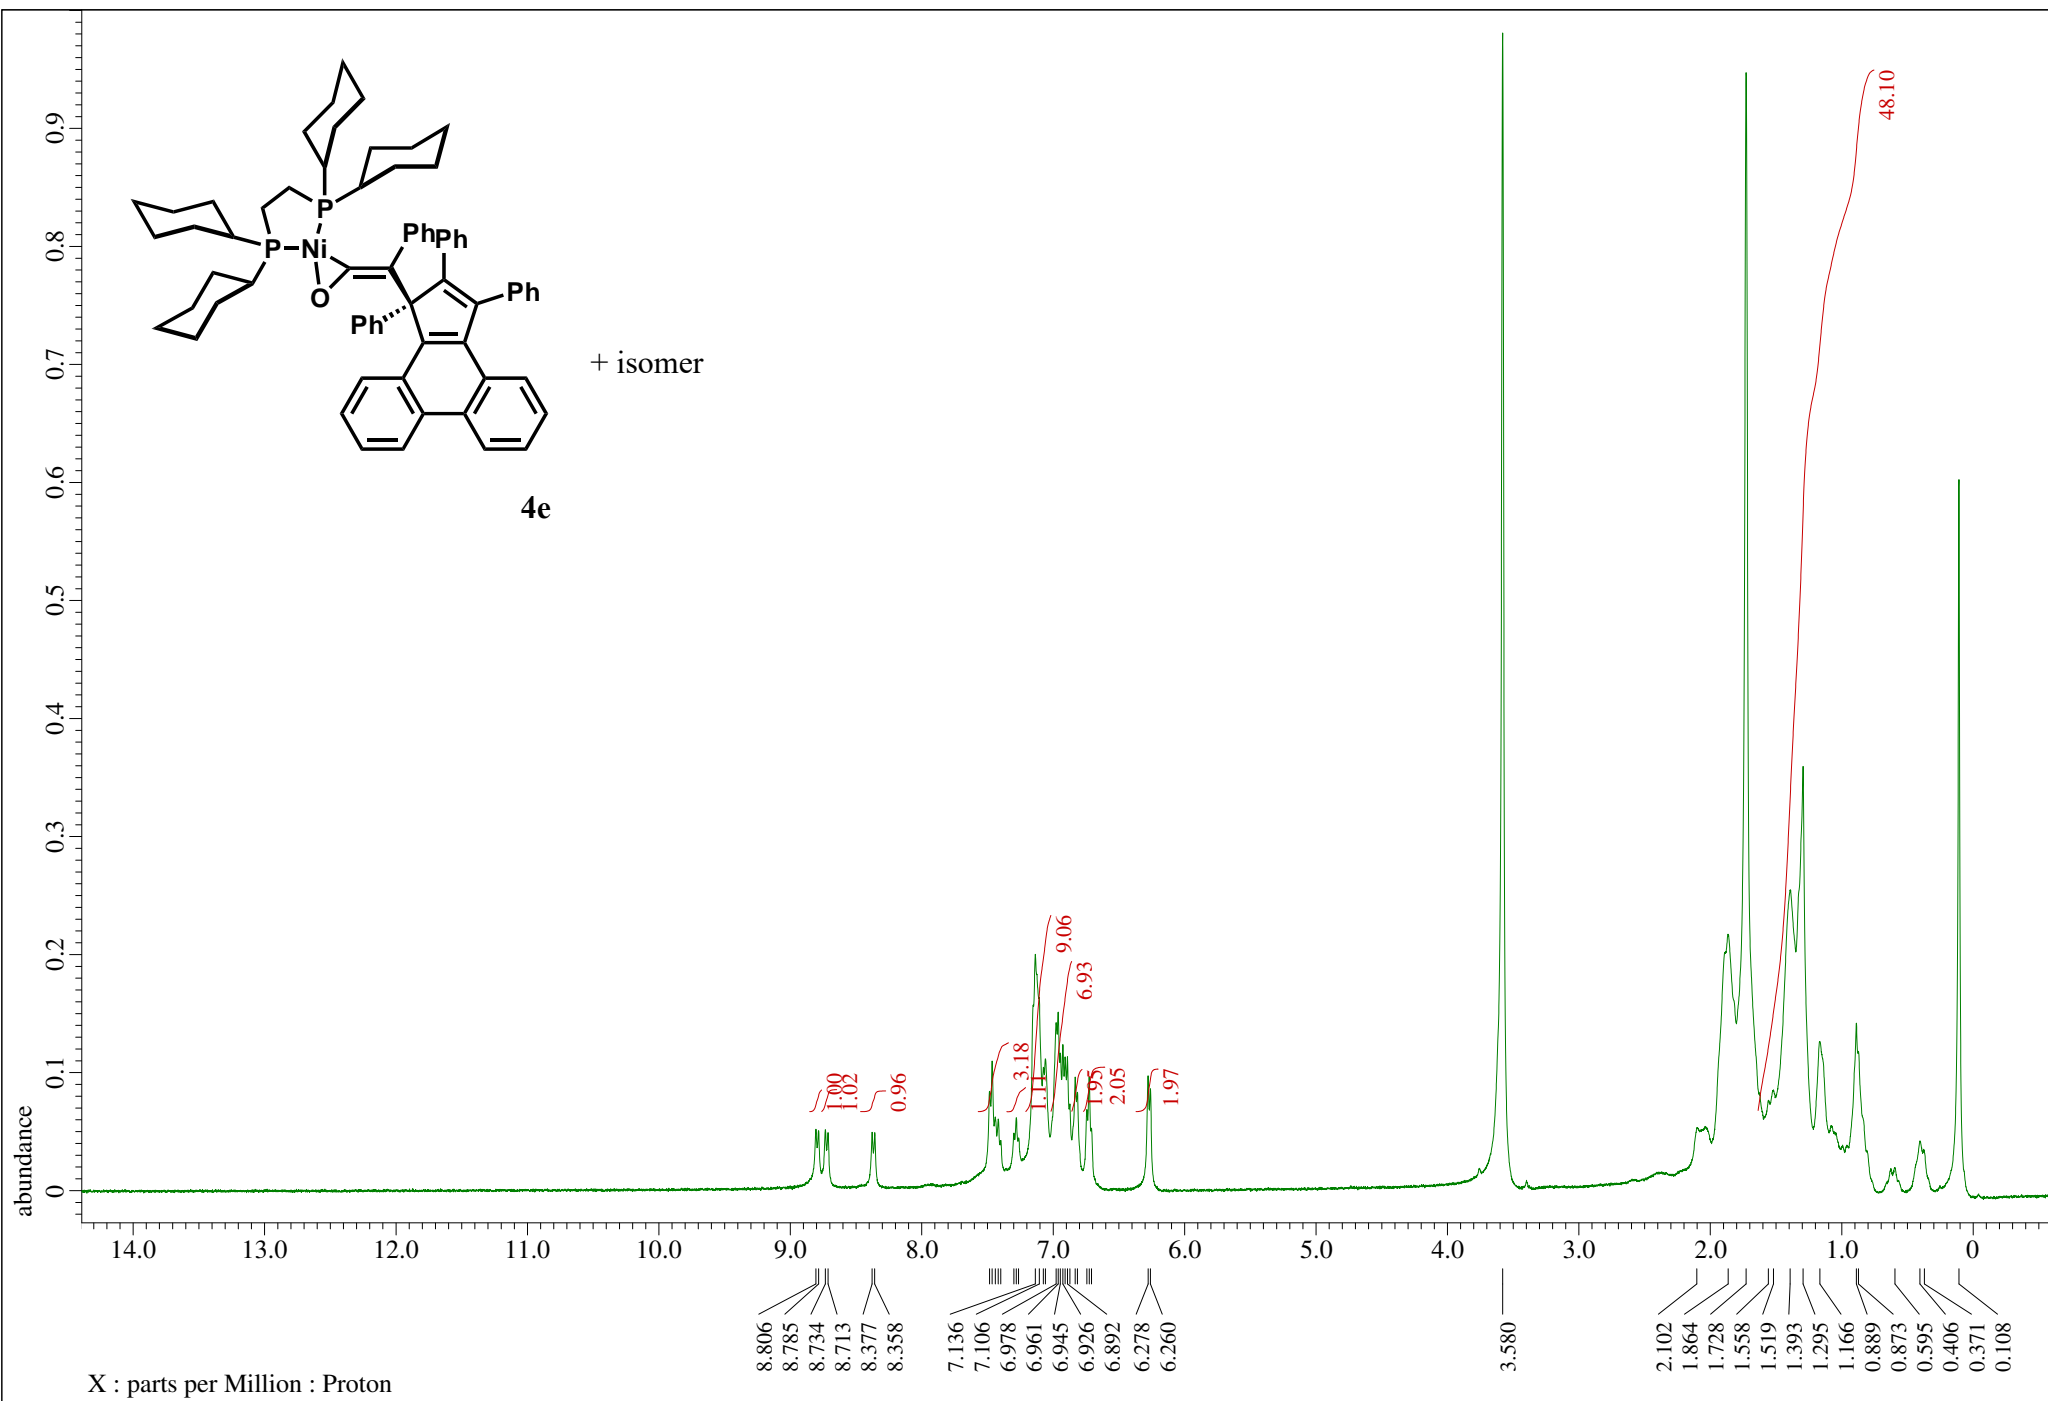

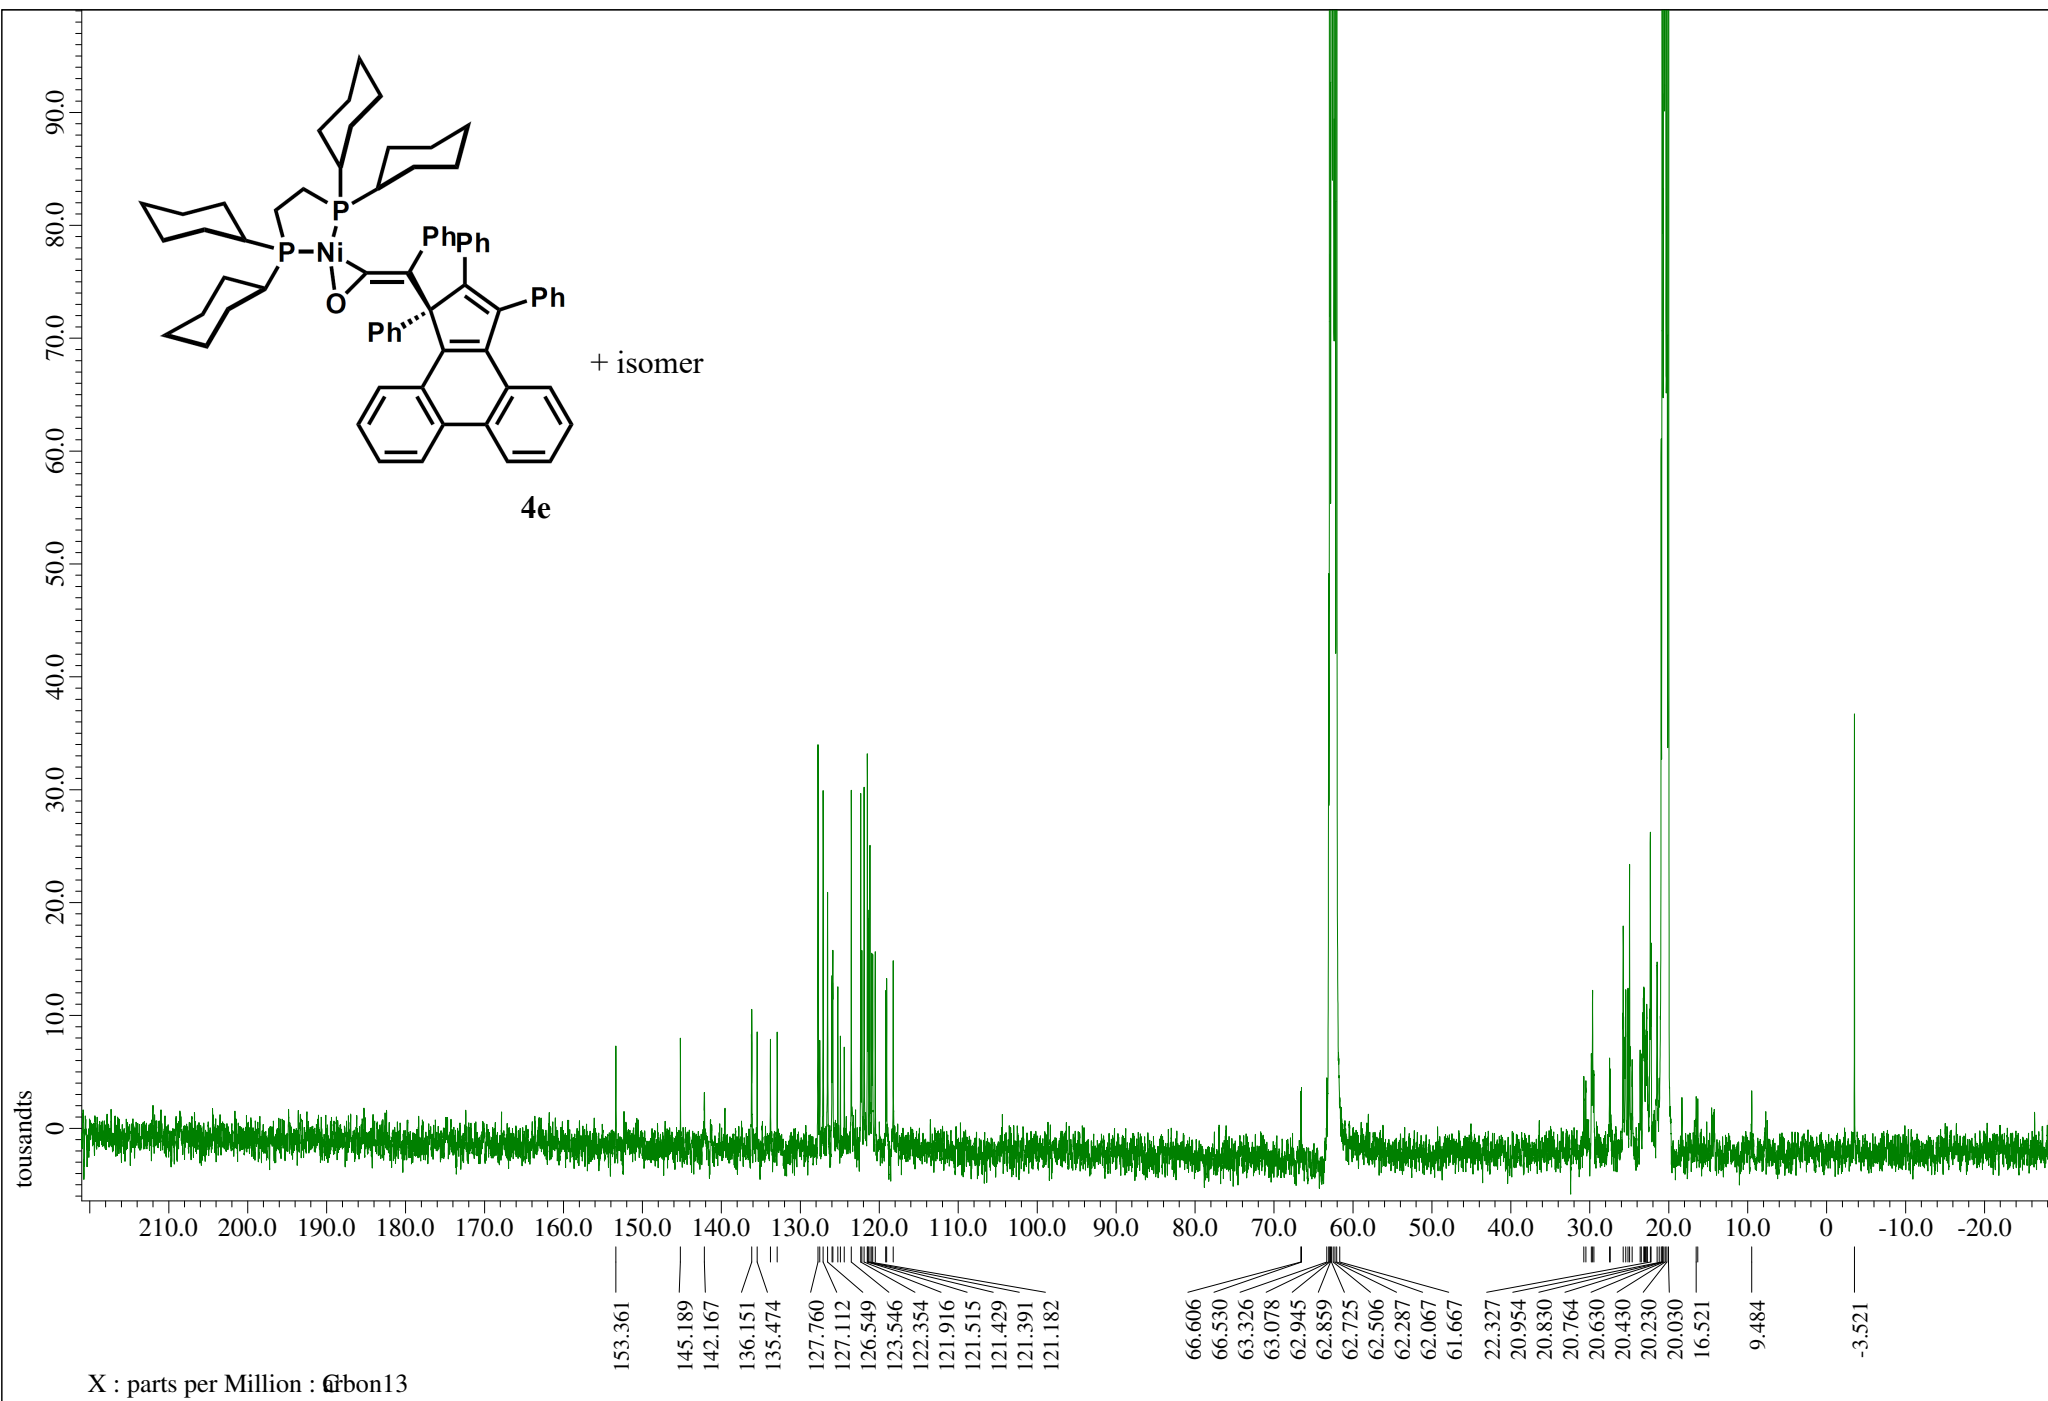

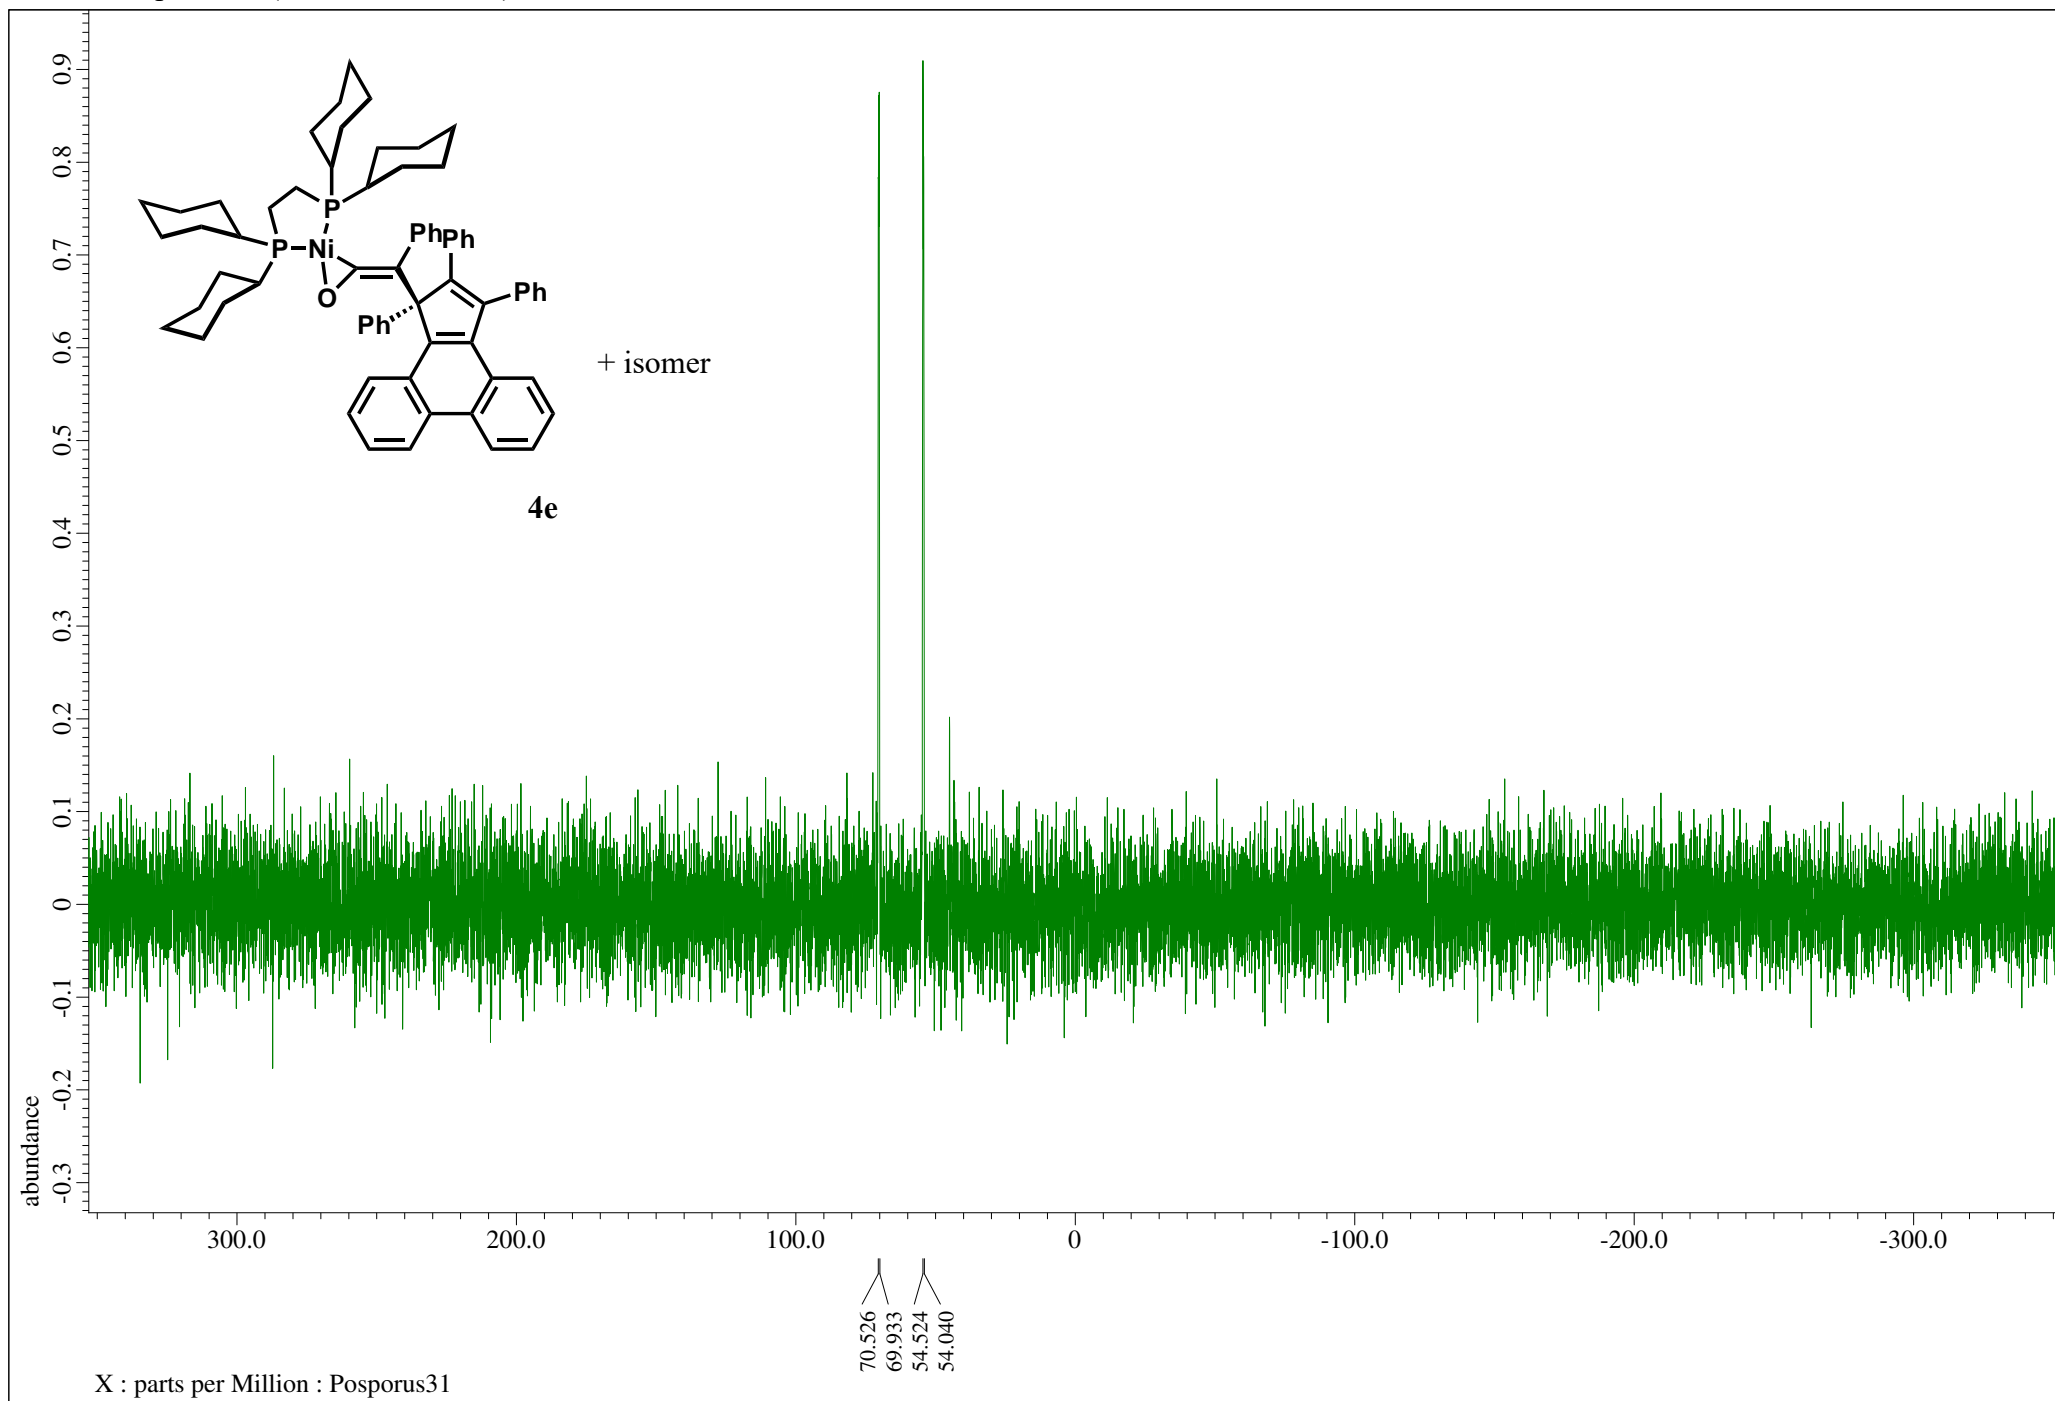



<sup>1</sup>H NMR spectrum (400 MHz, CDCl<sub>3</sub>) of **6e**

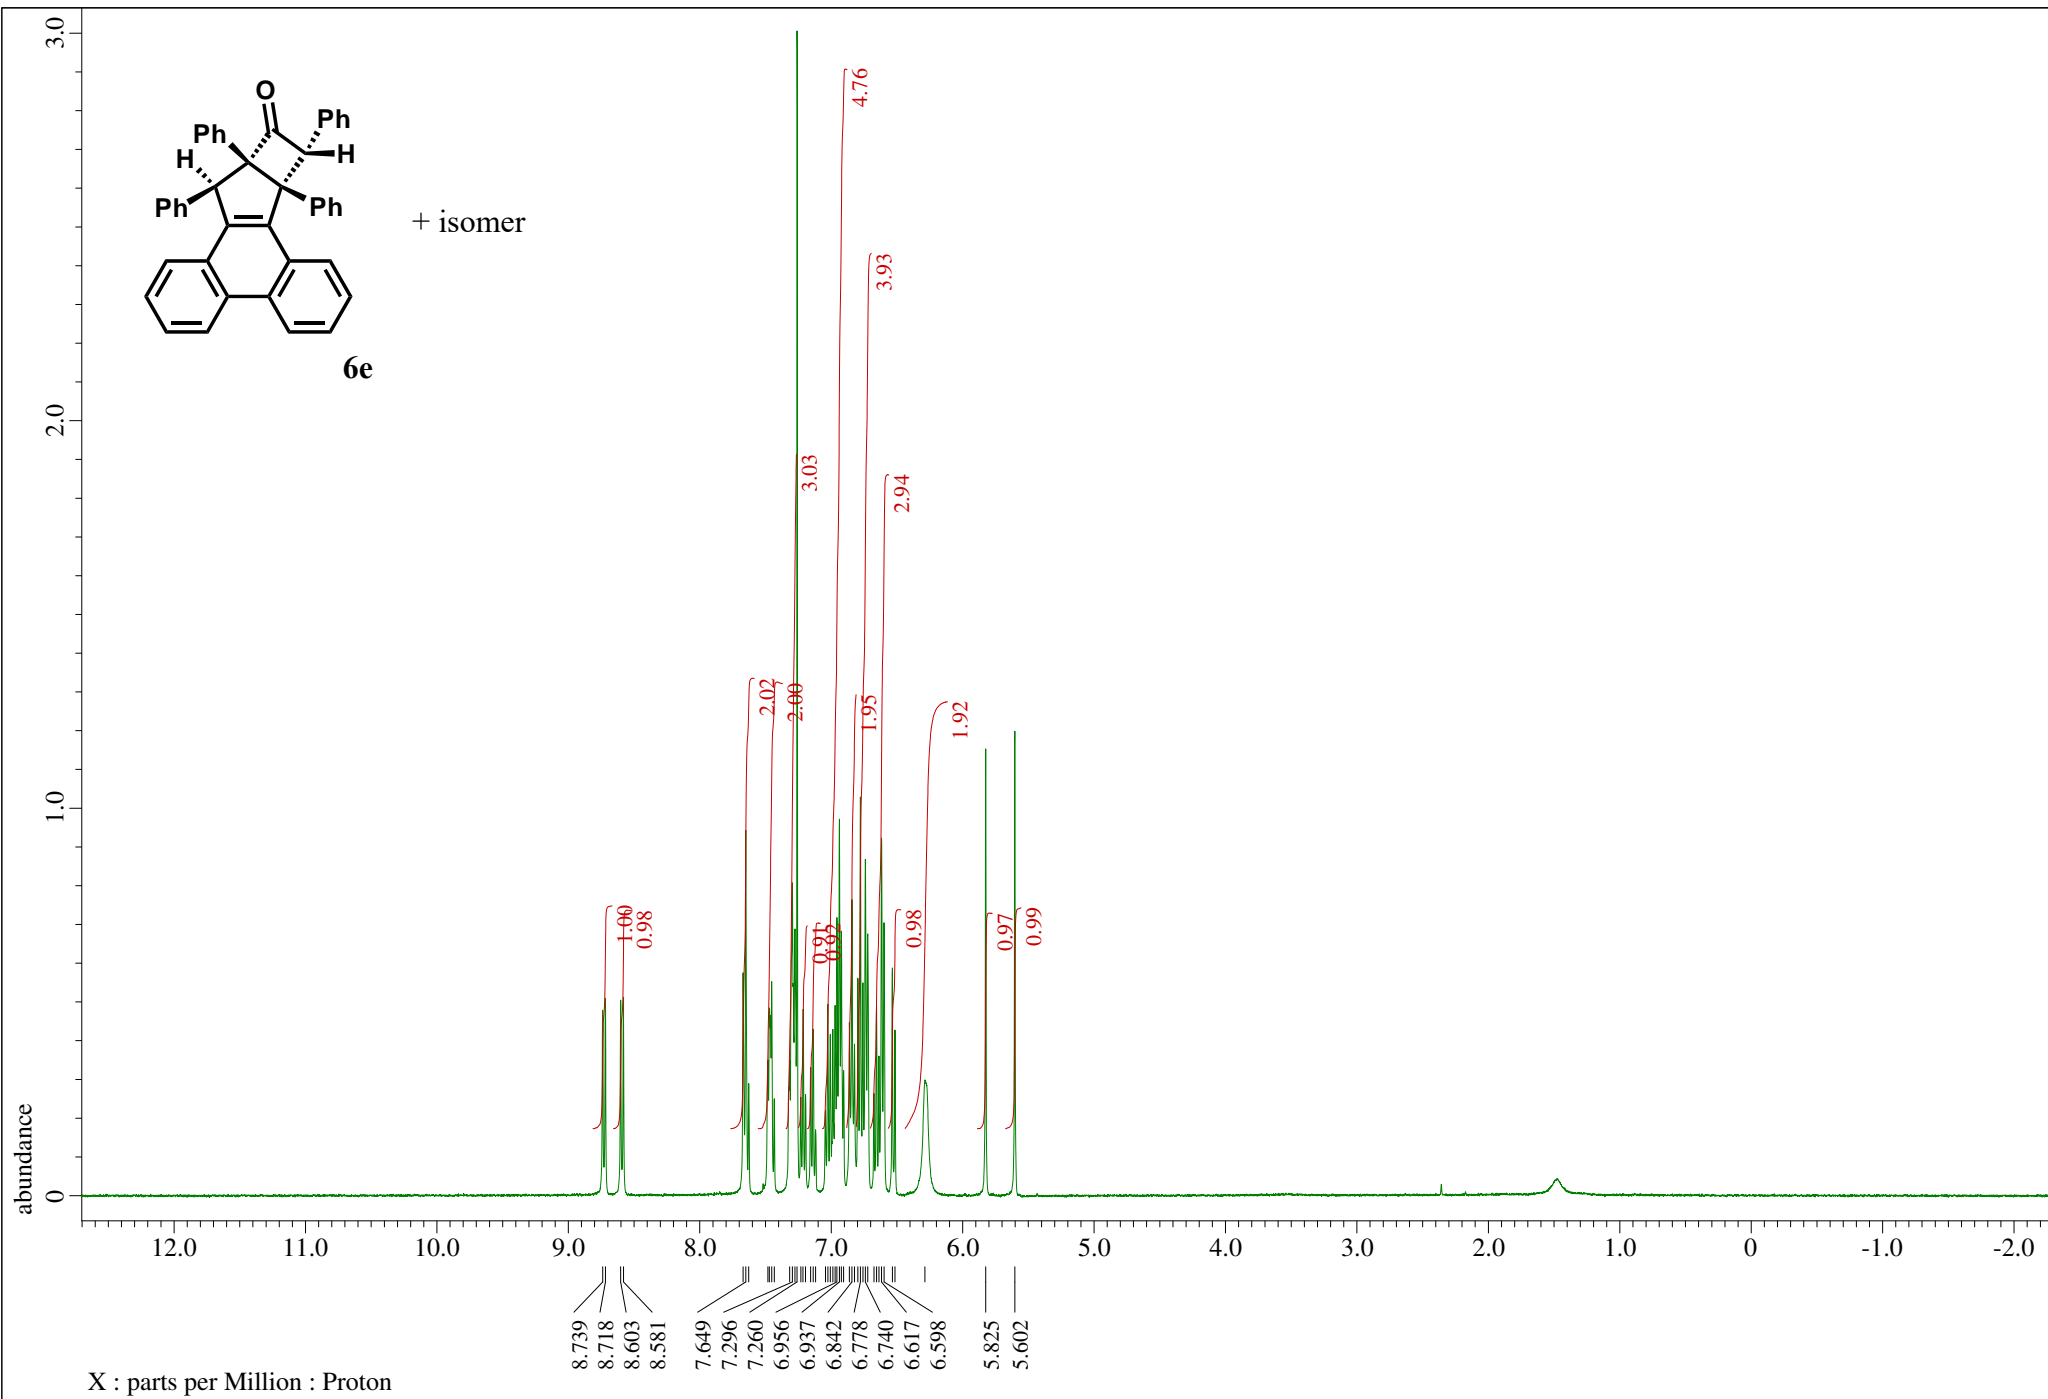

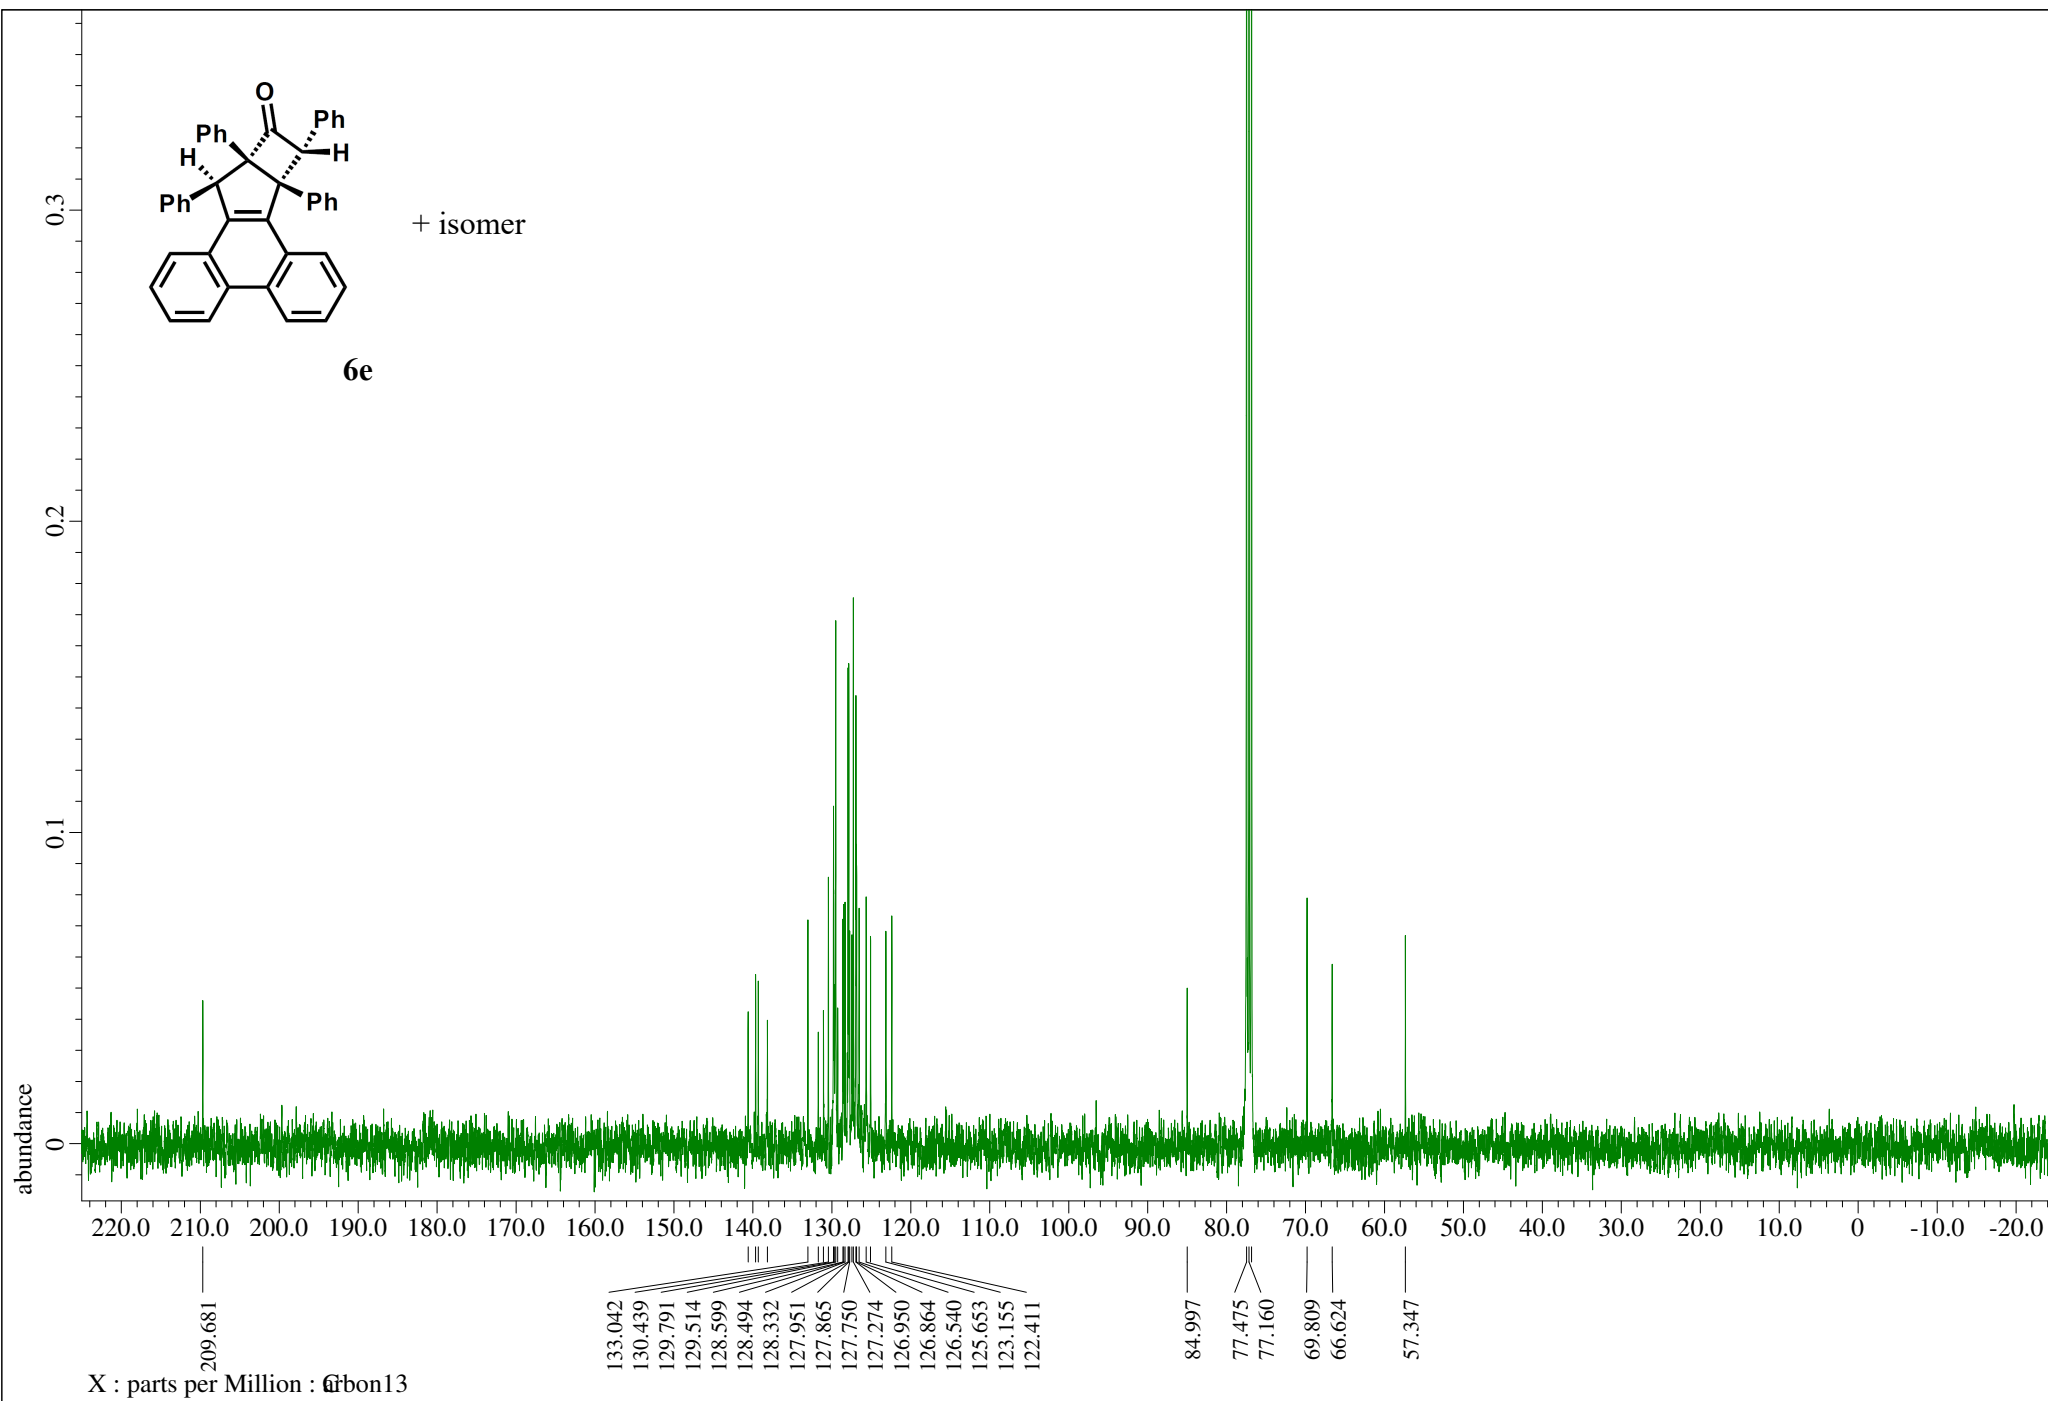

$^1\text{H}$  NMR spectrum (400 MHz,  $\text{CDCl}_3$ ) of **6e-d<sub>2</sub>**

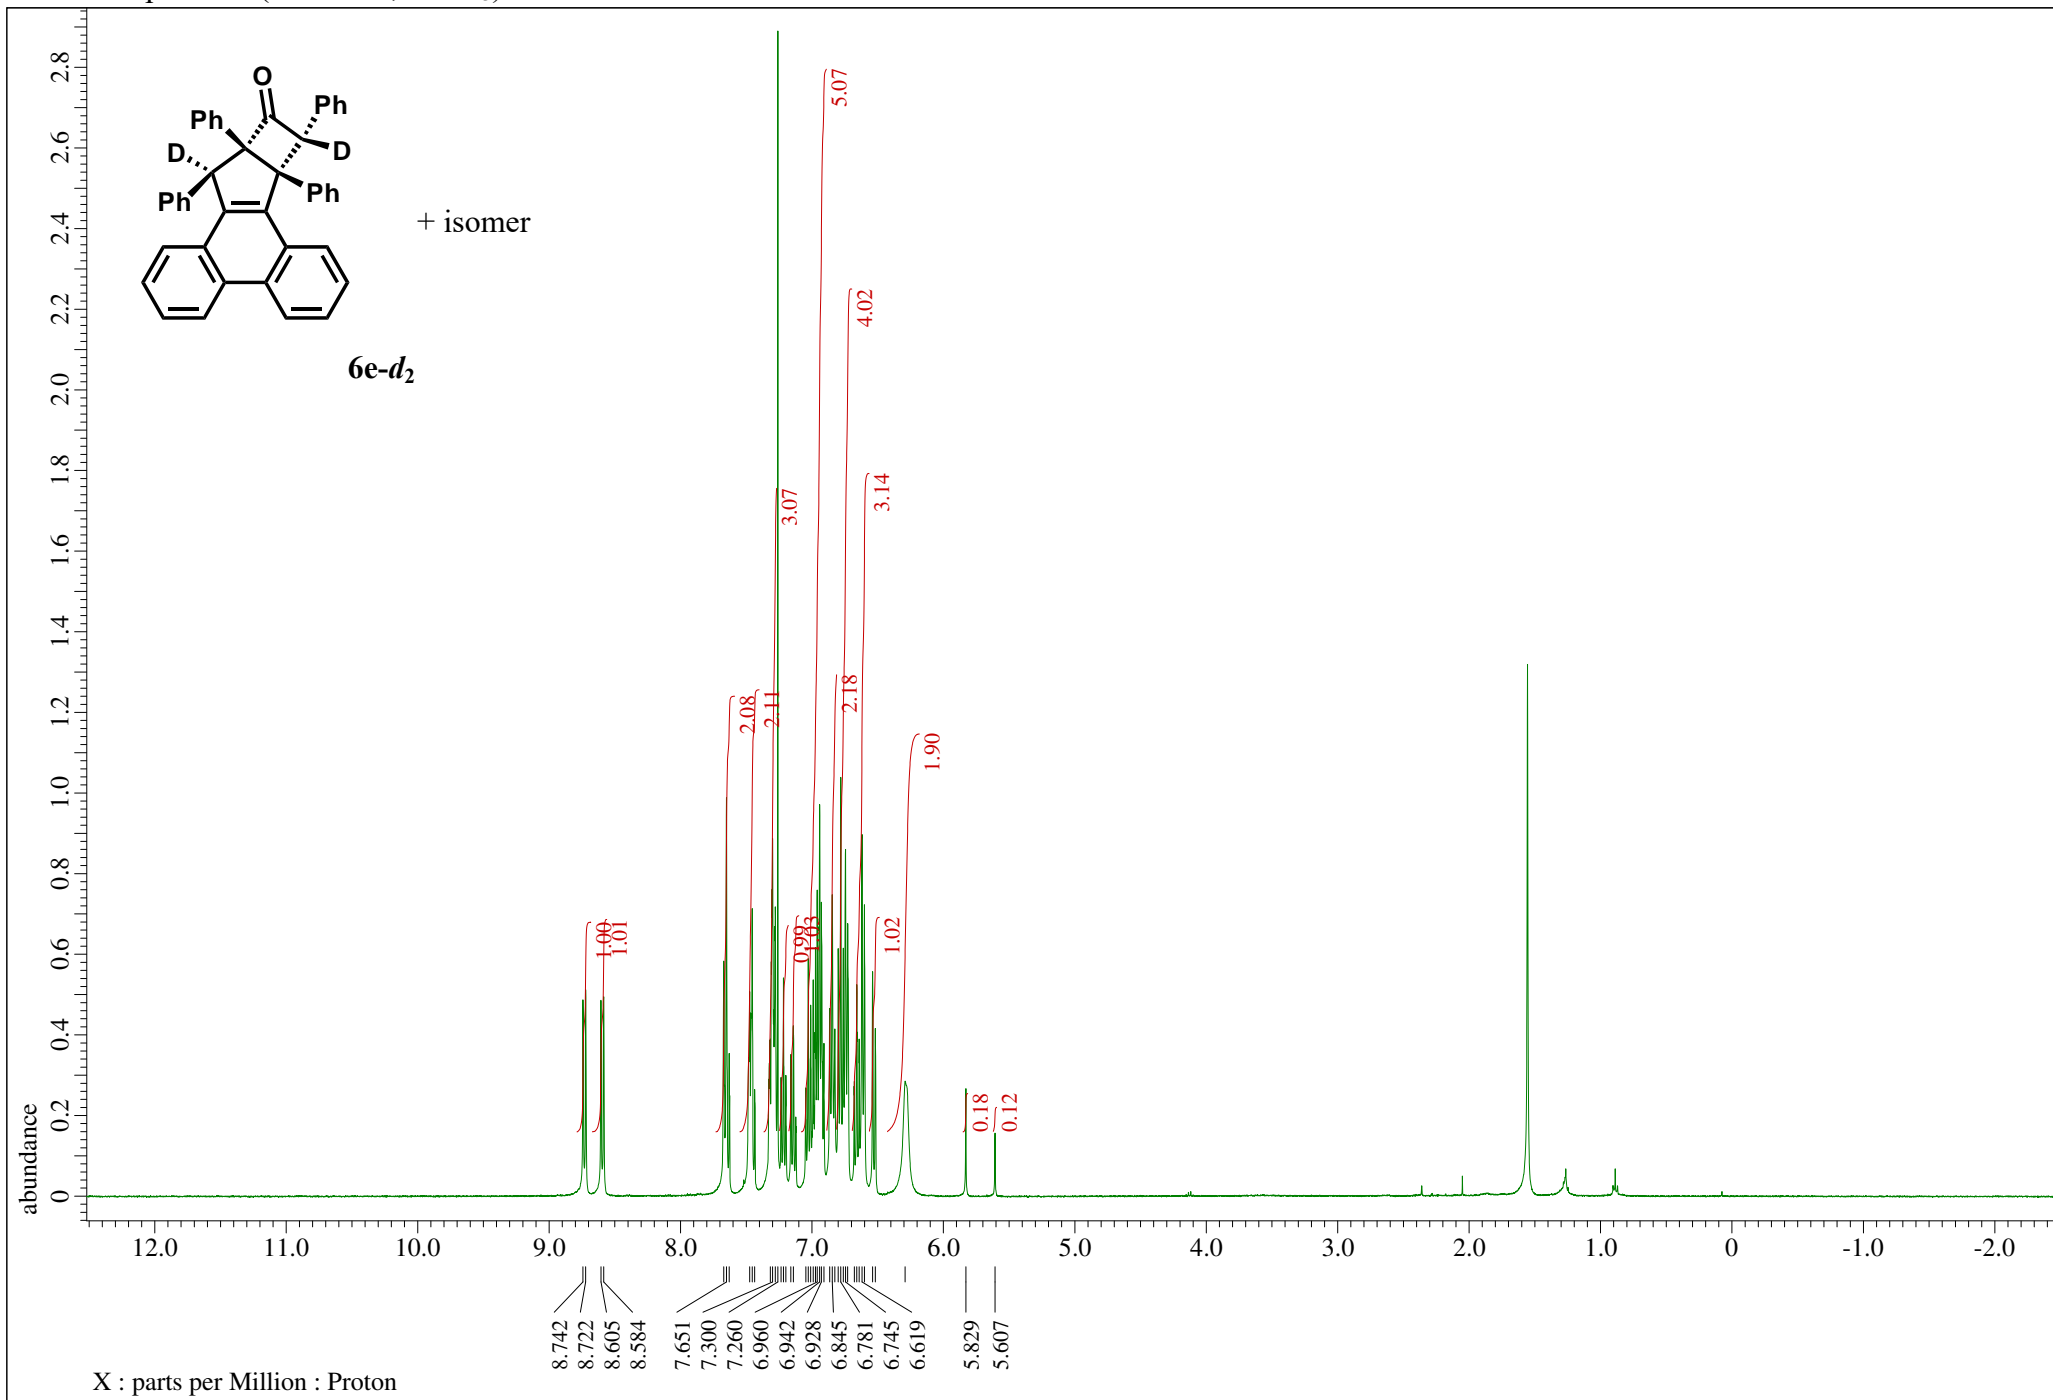

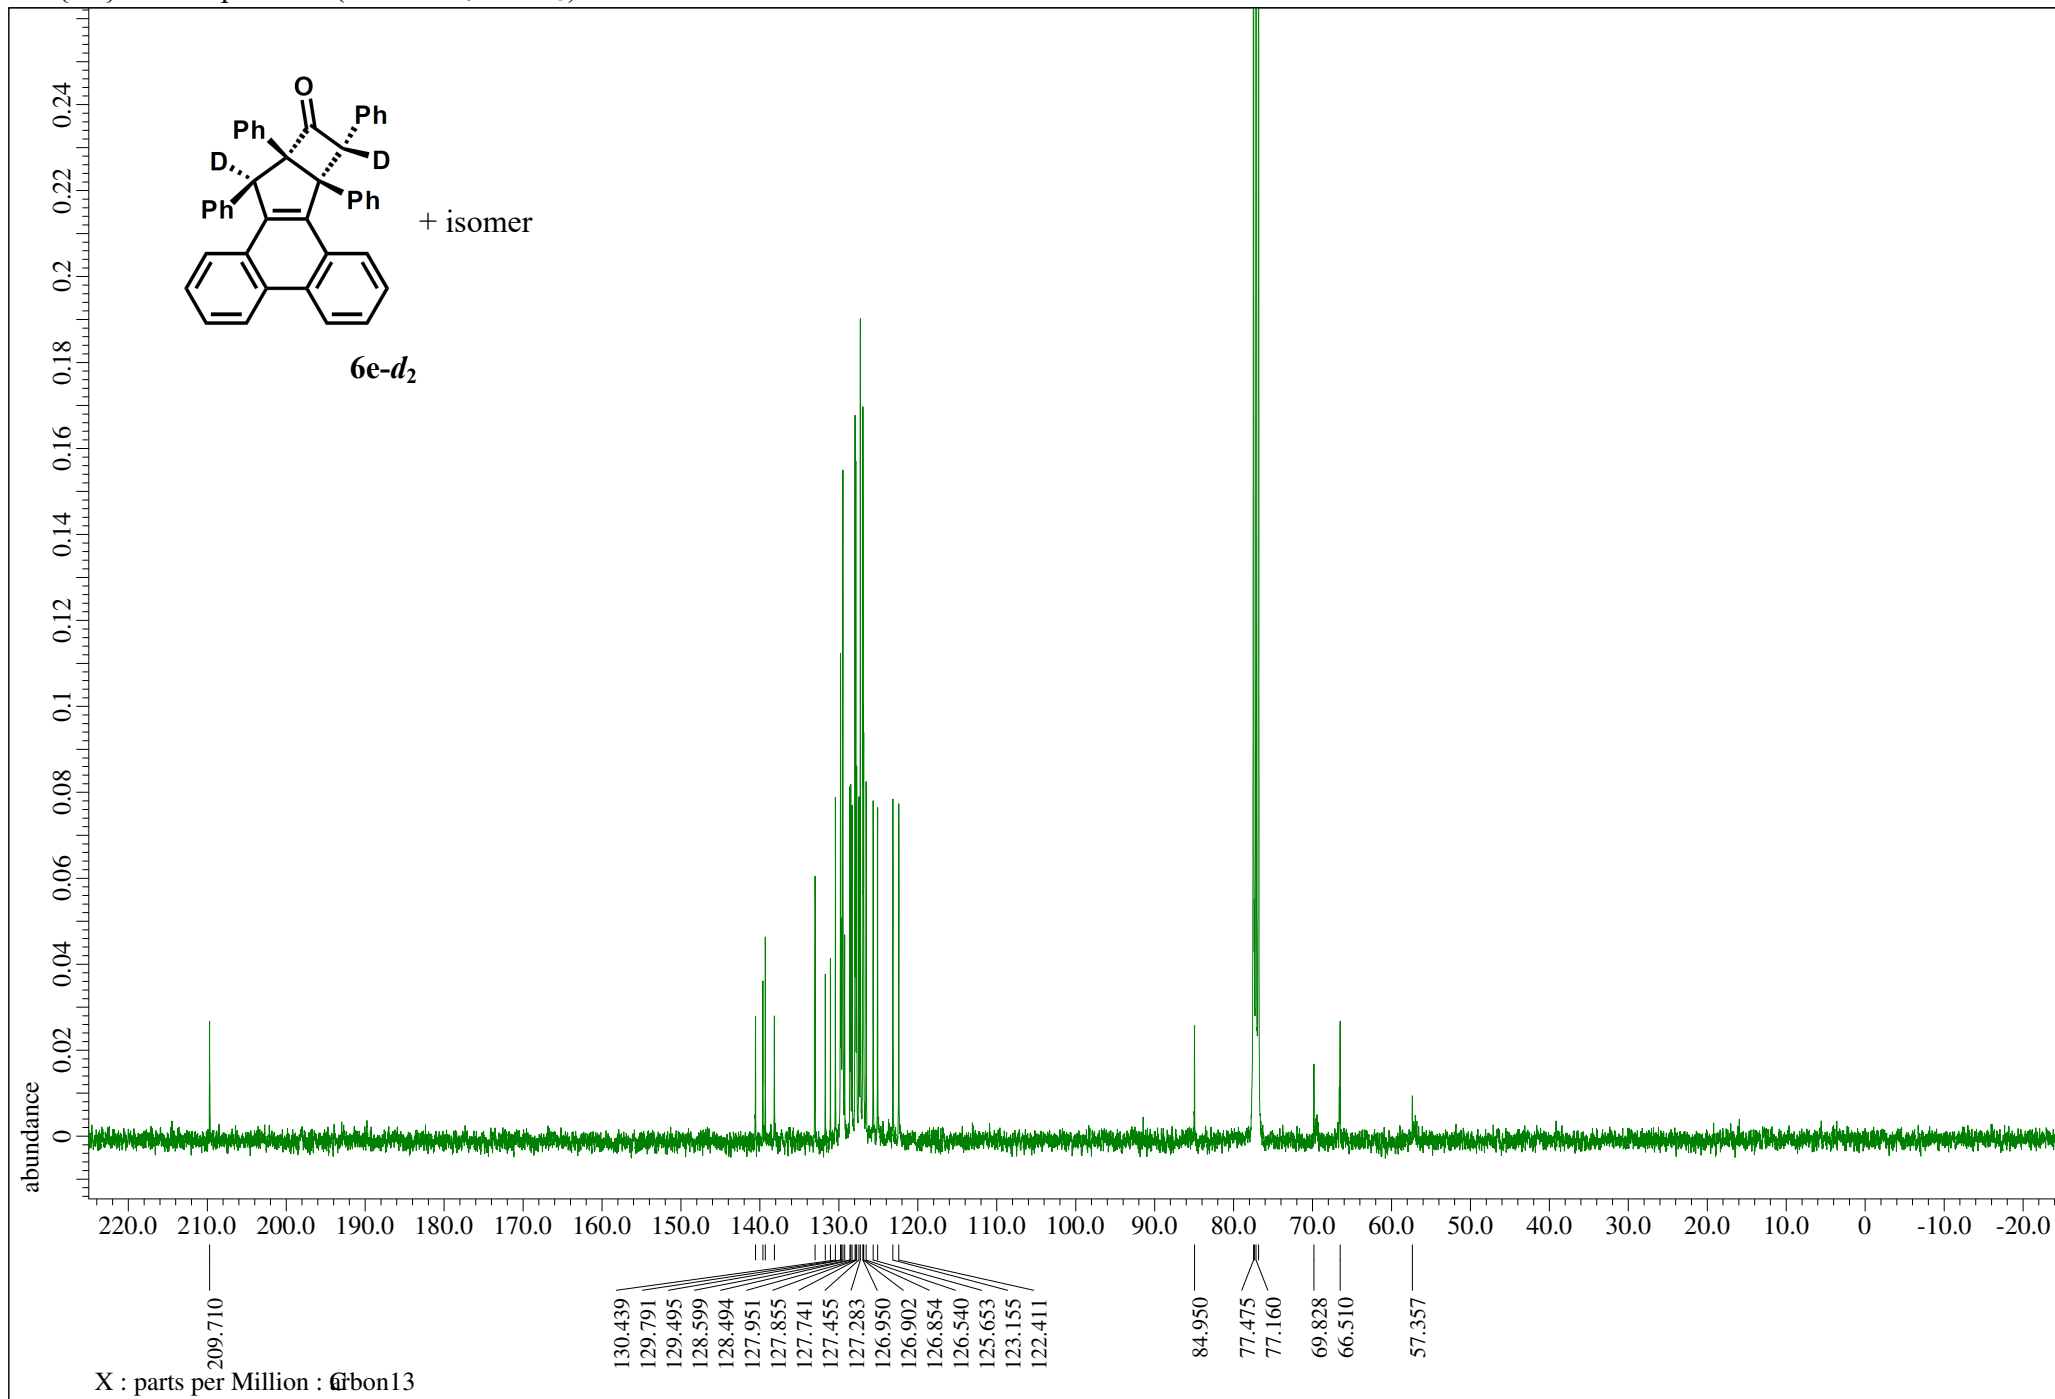

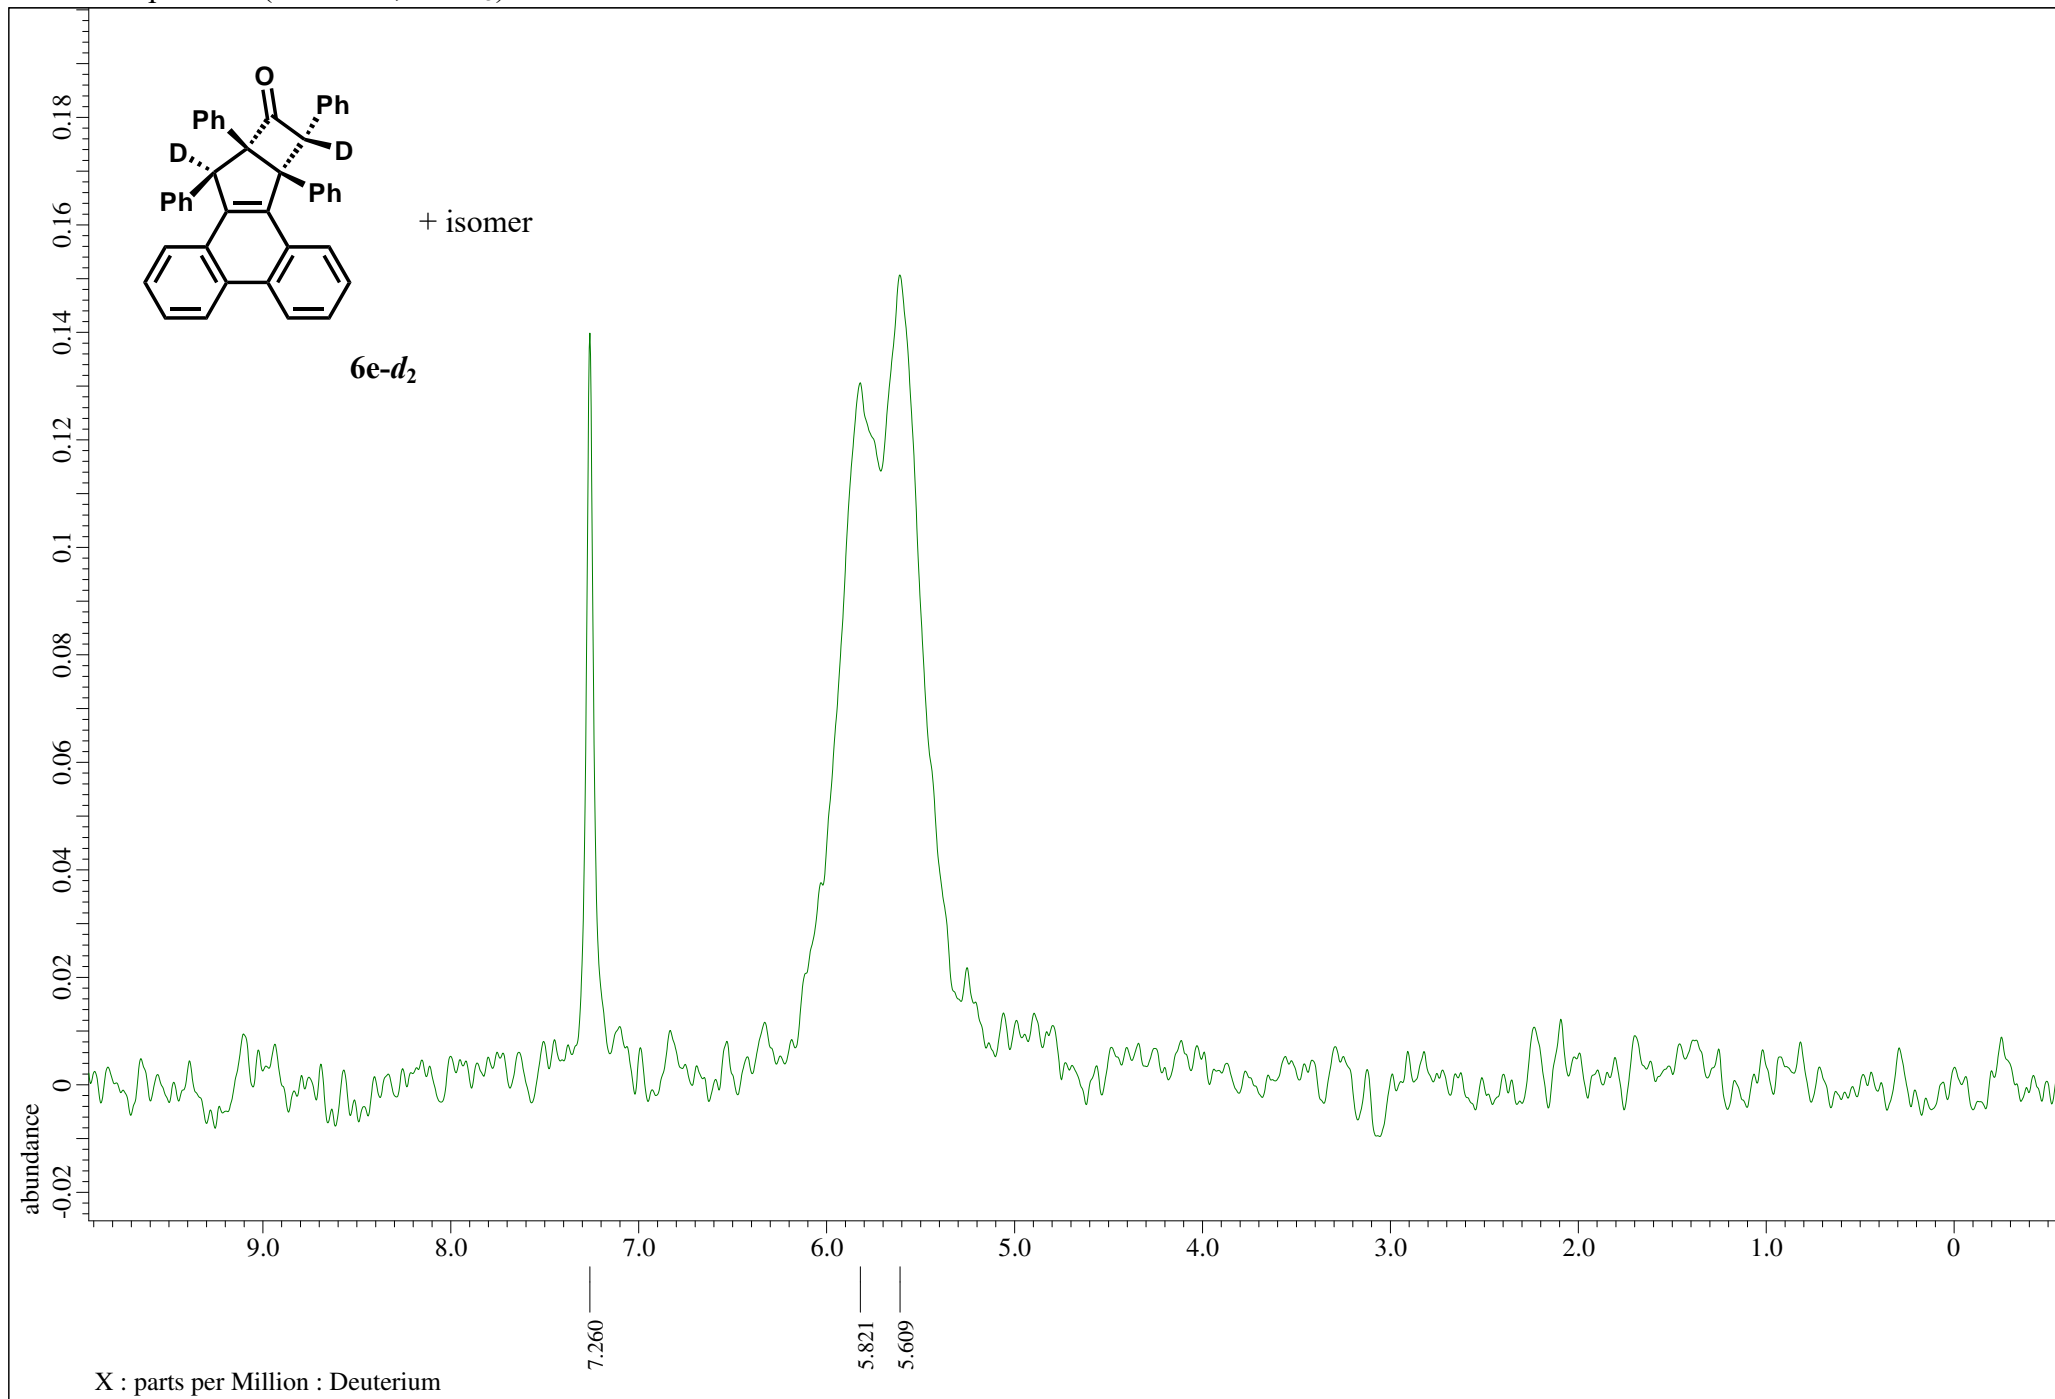

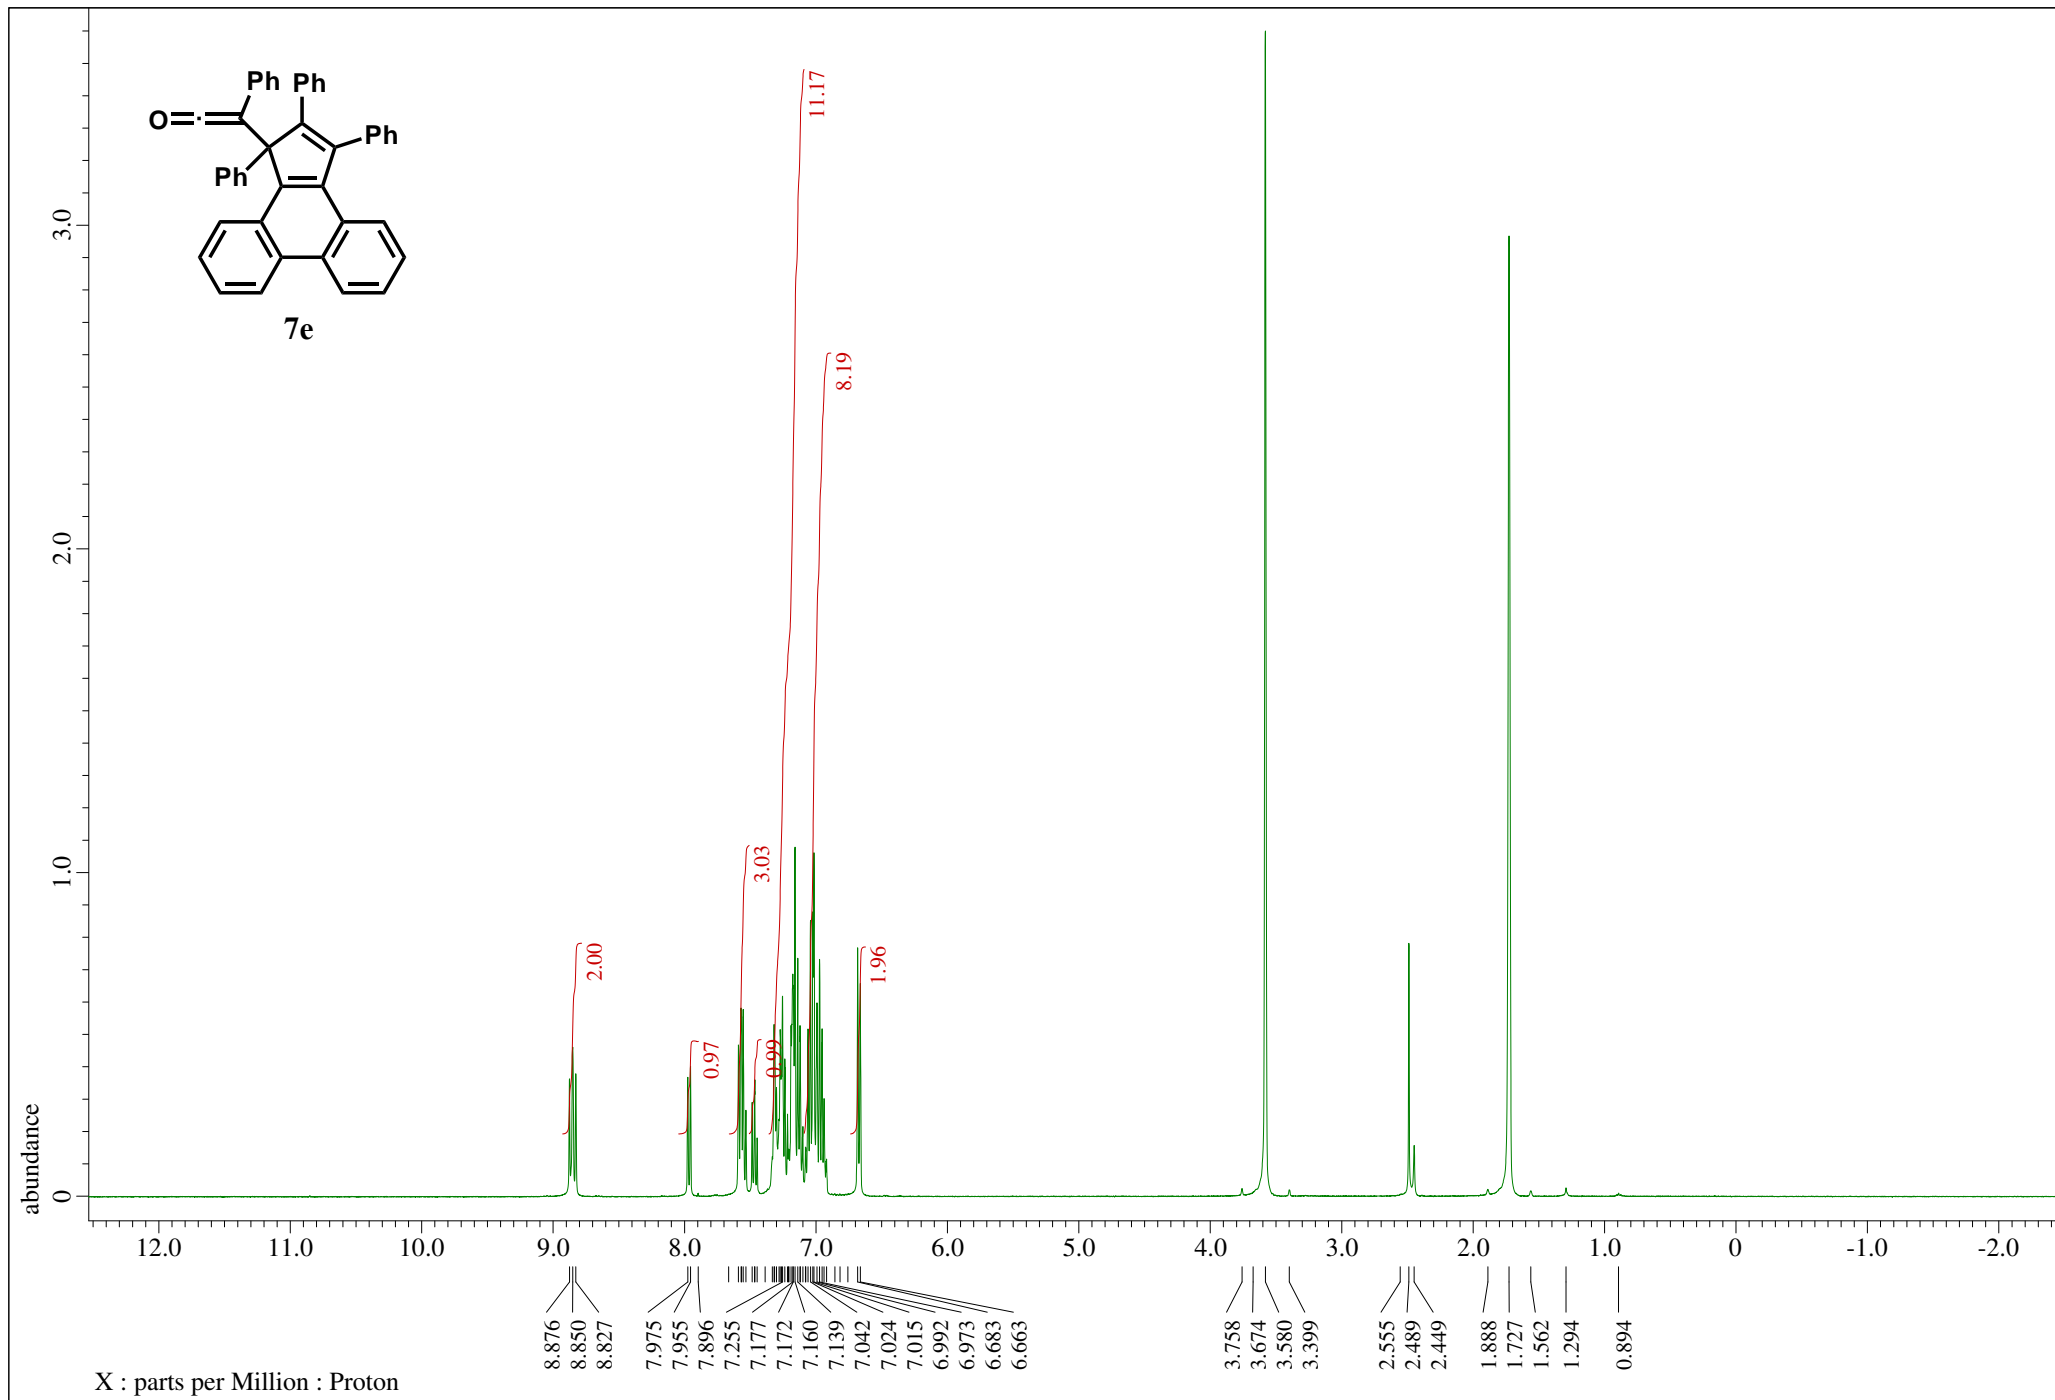

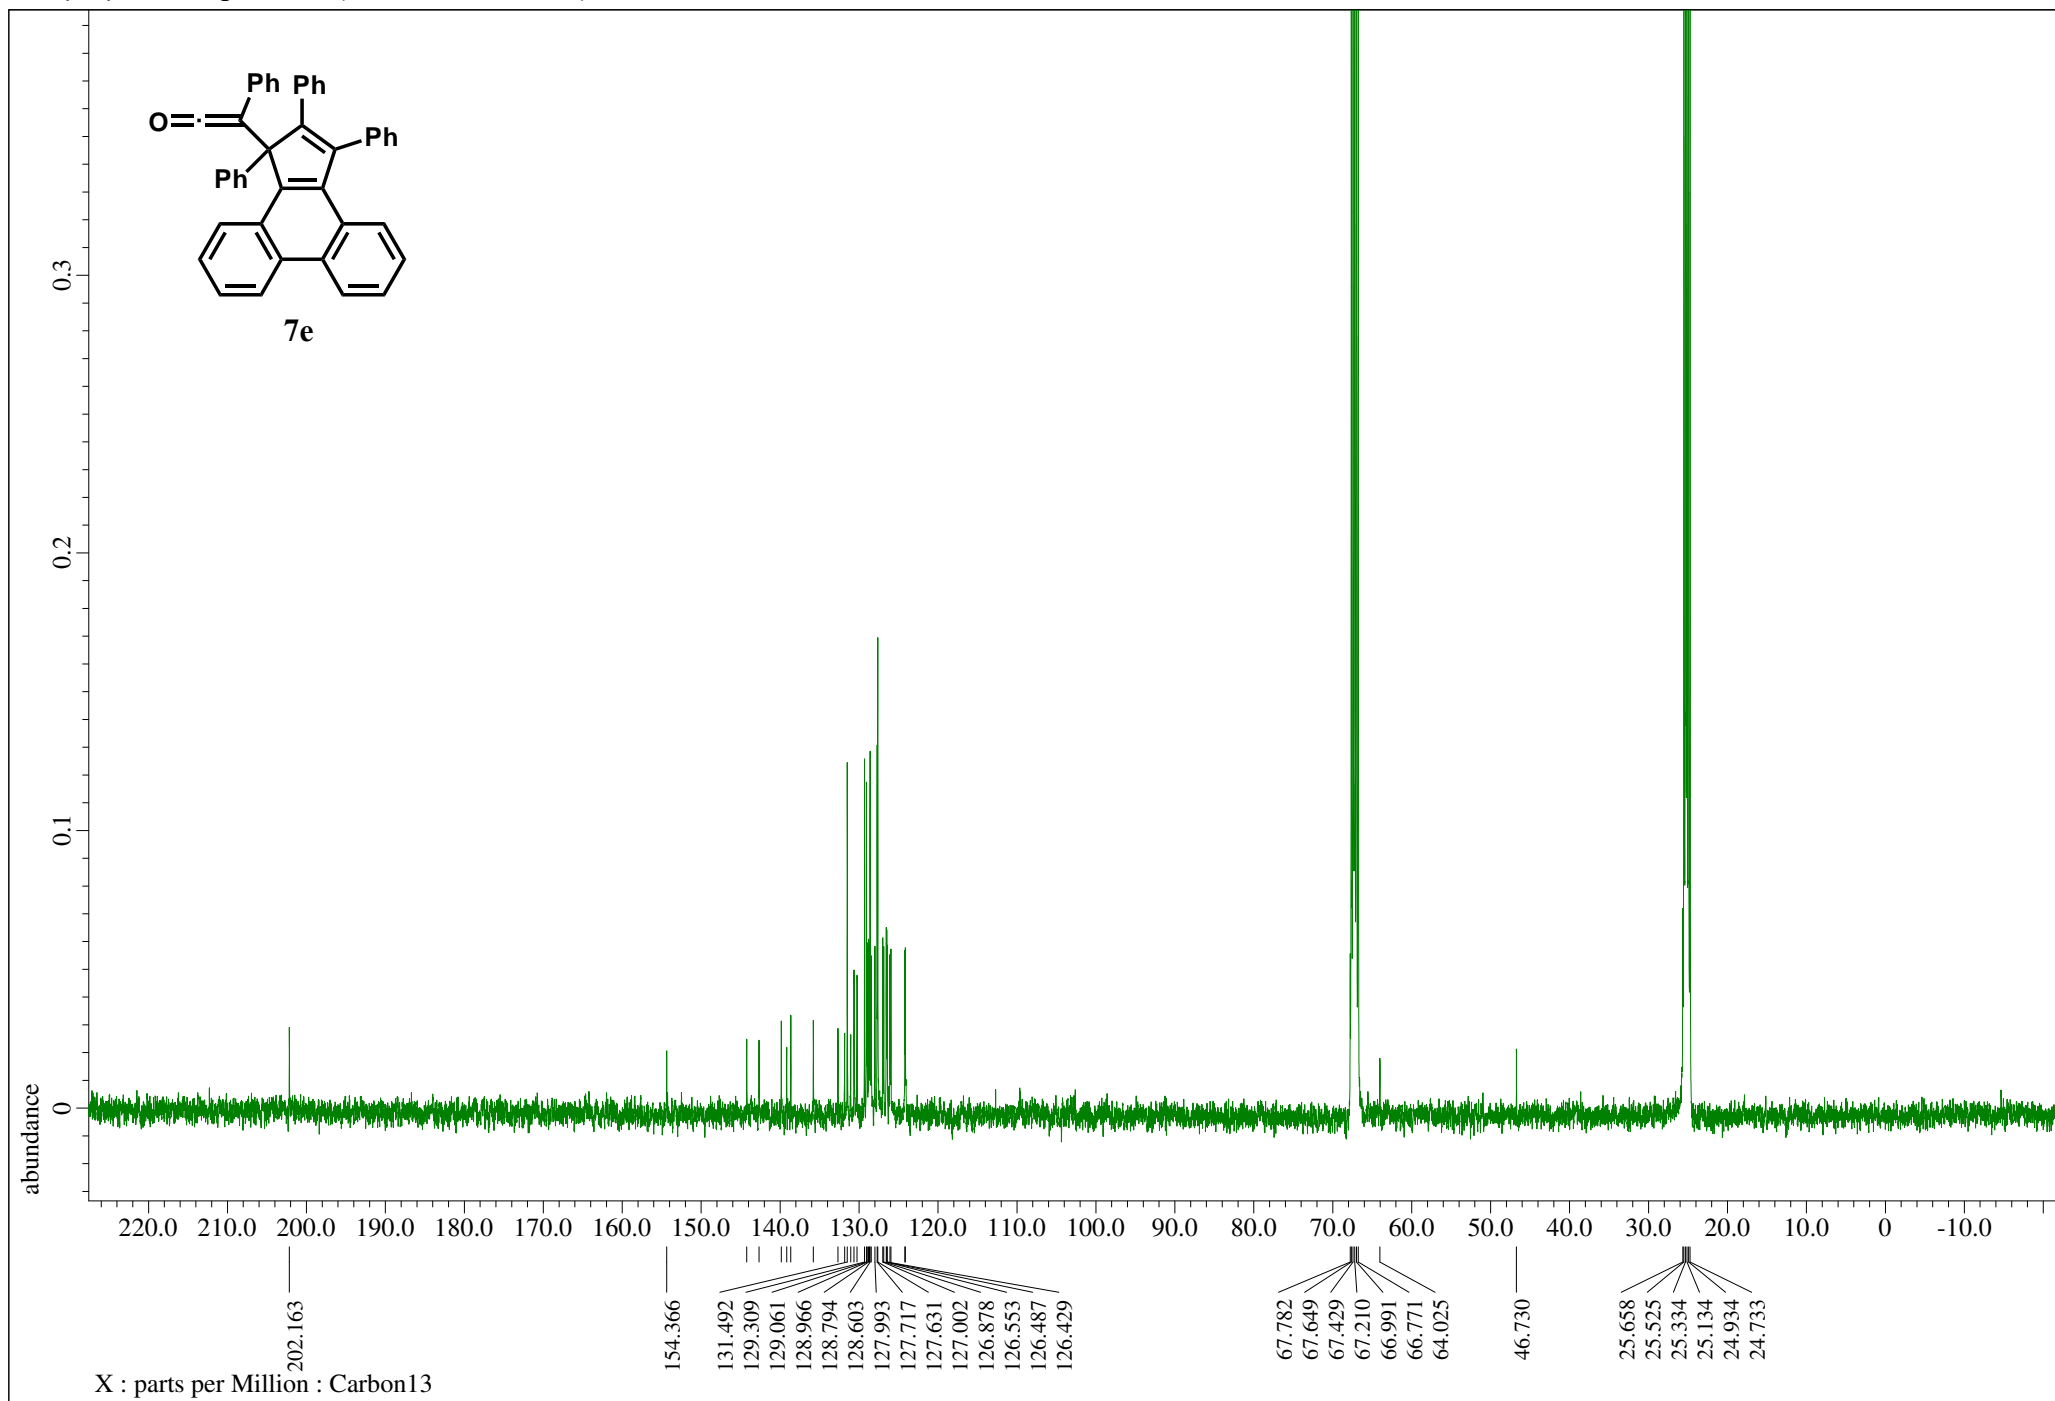

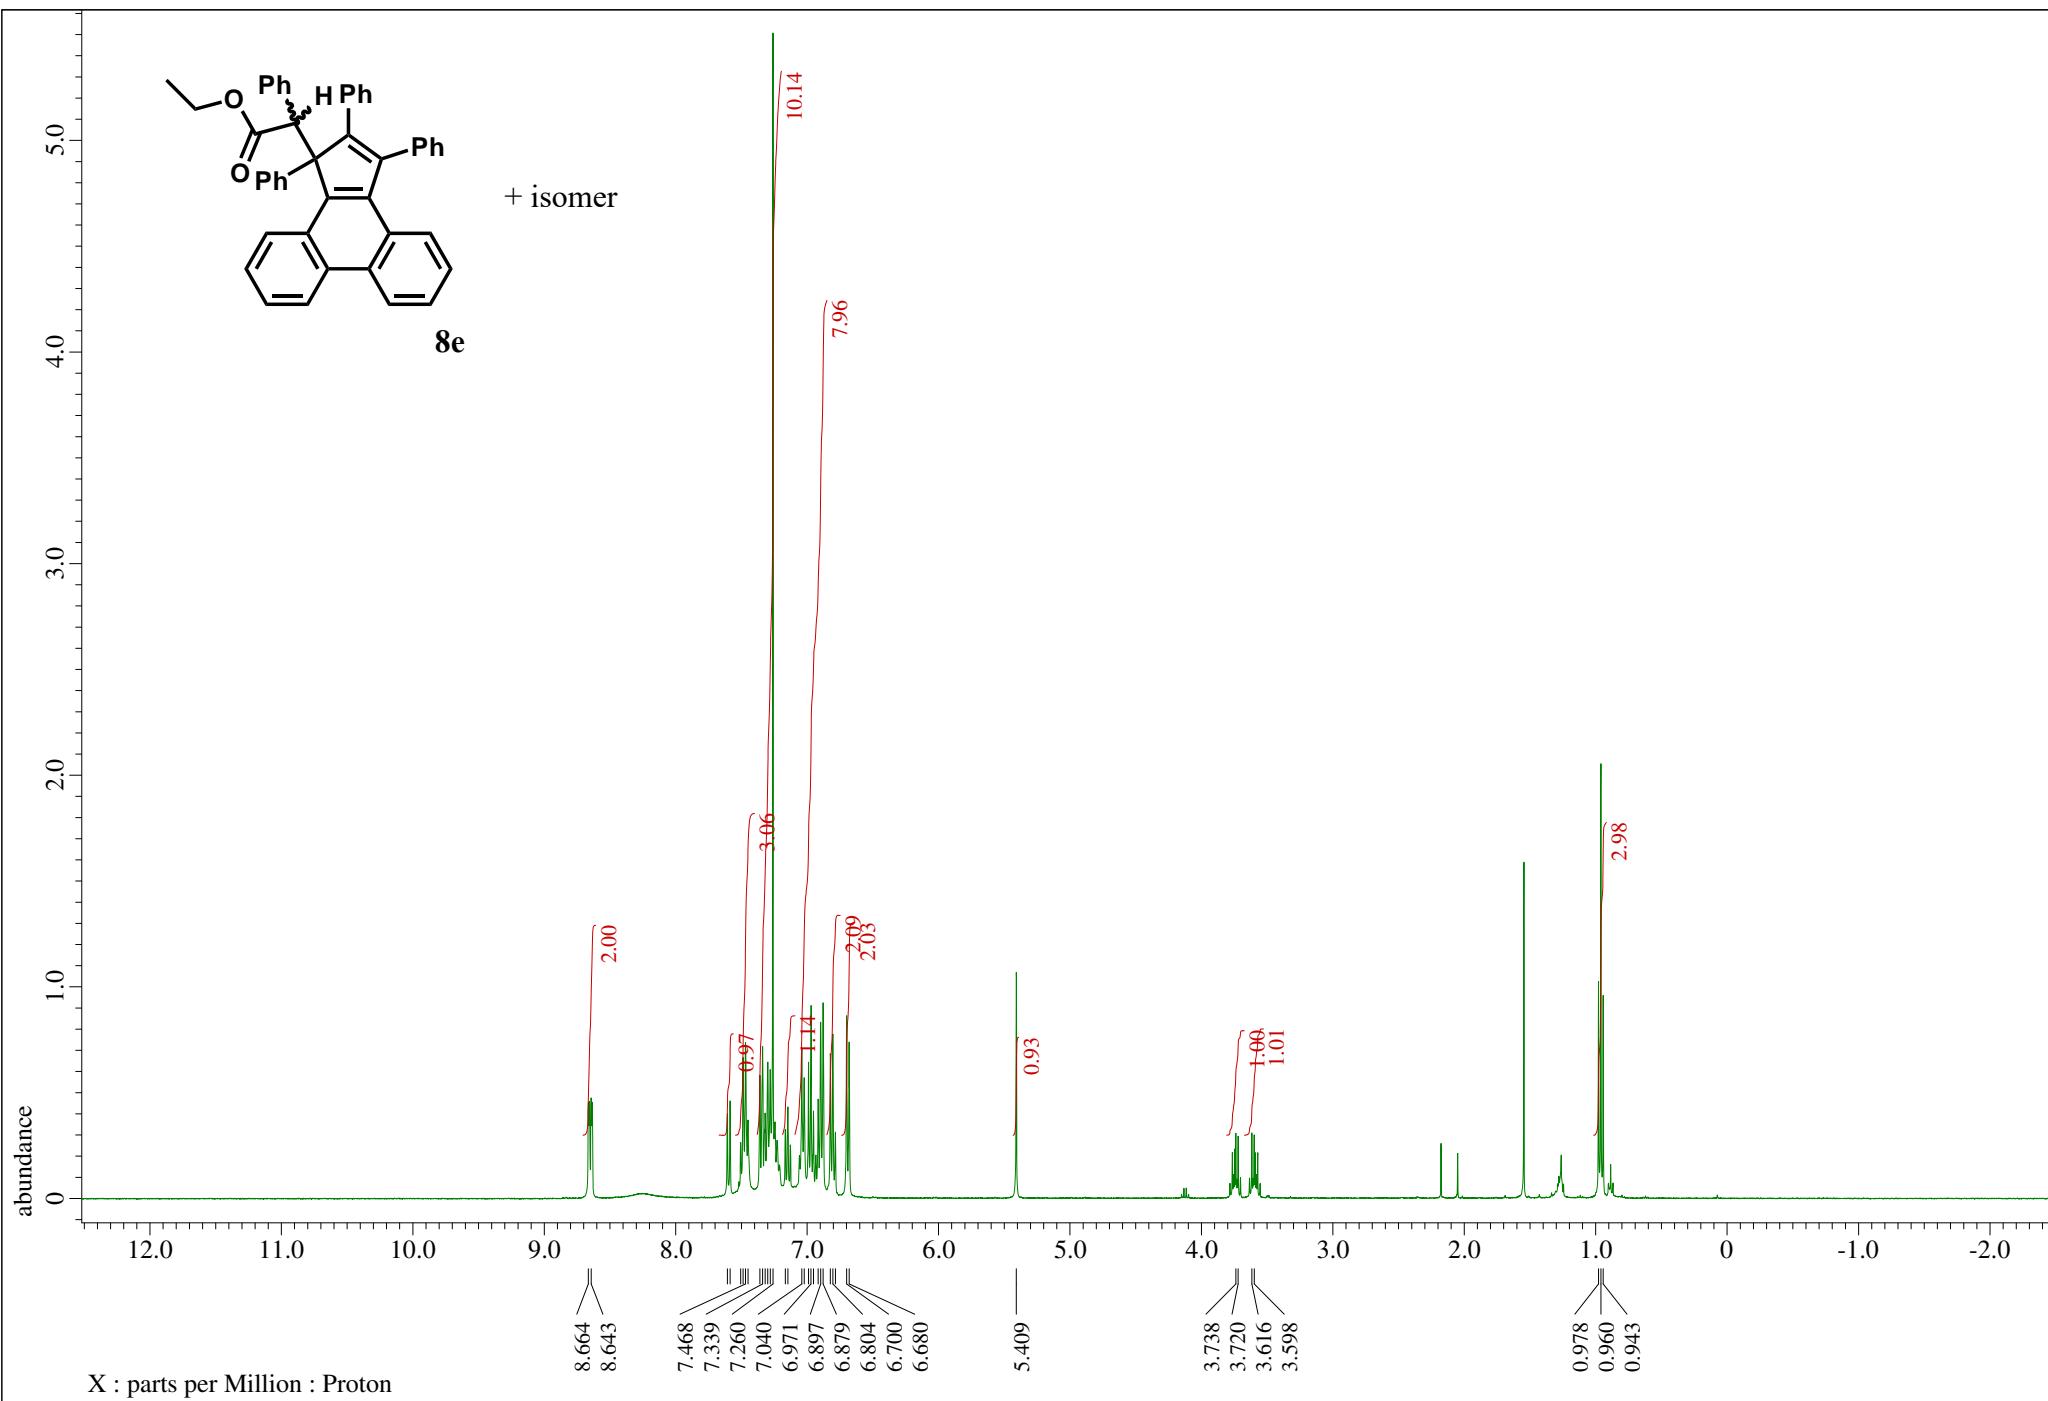



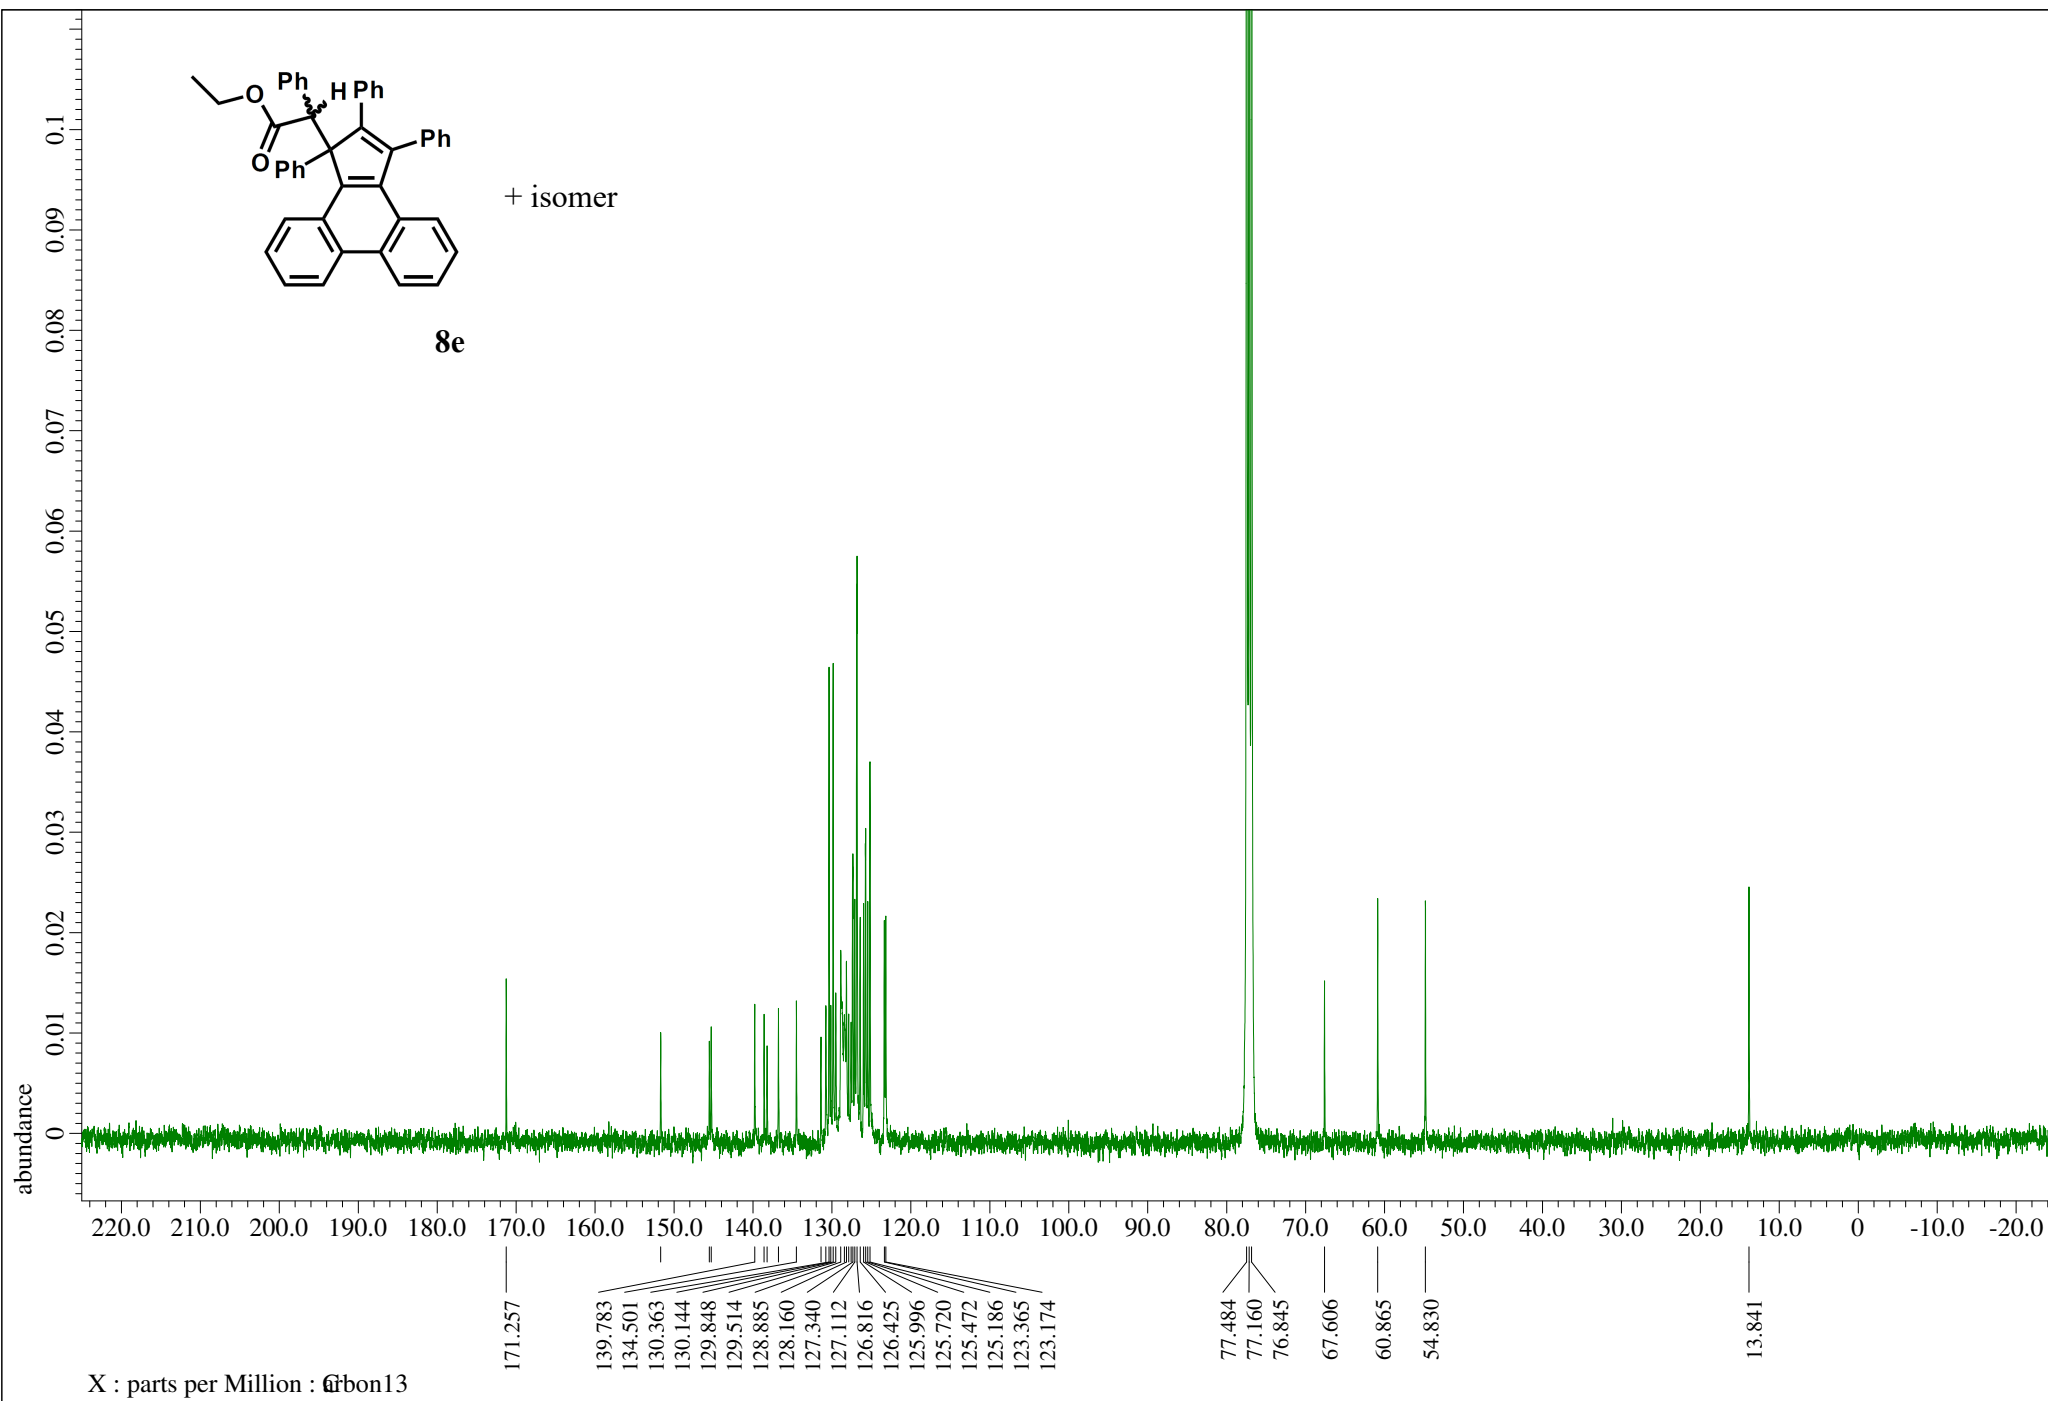

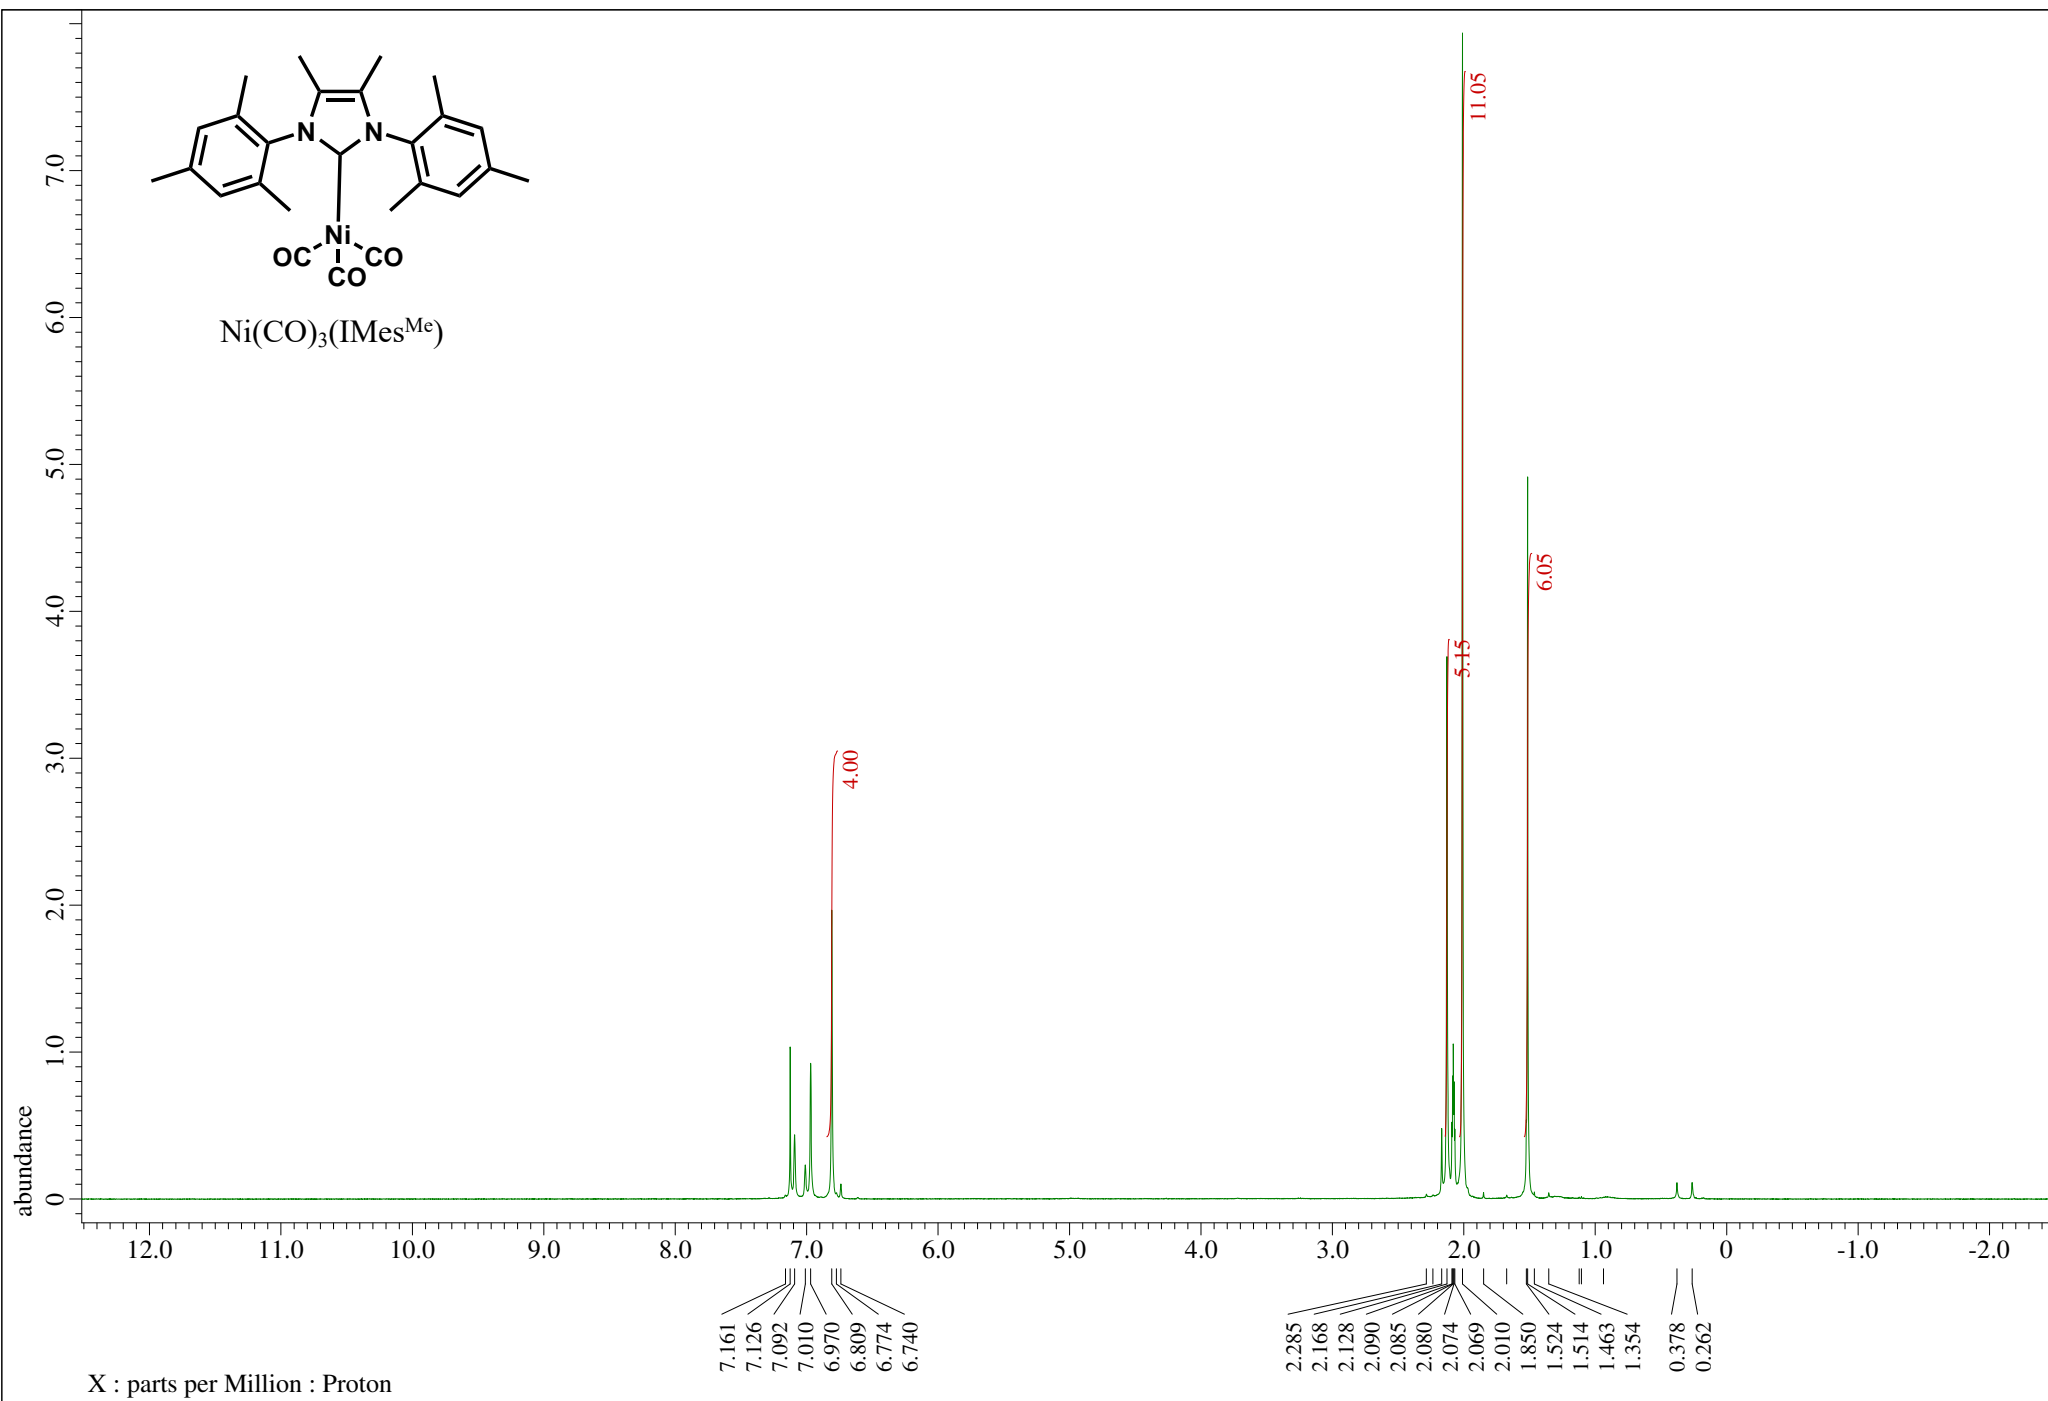

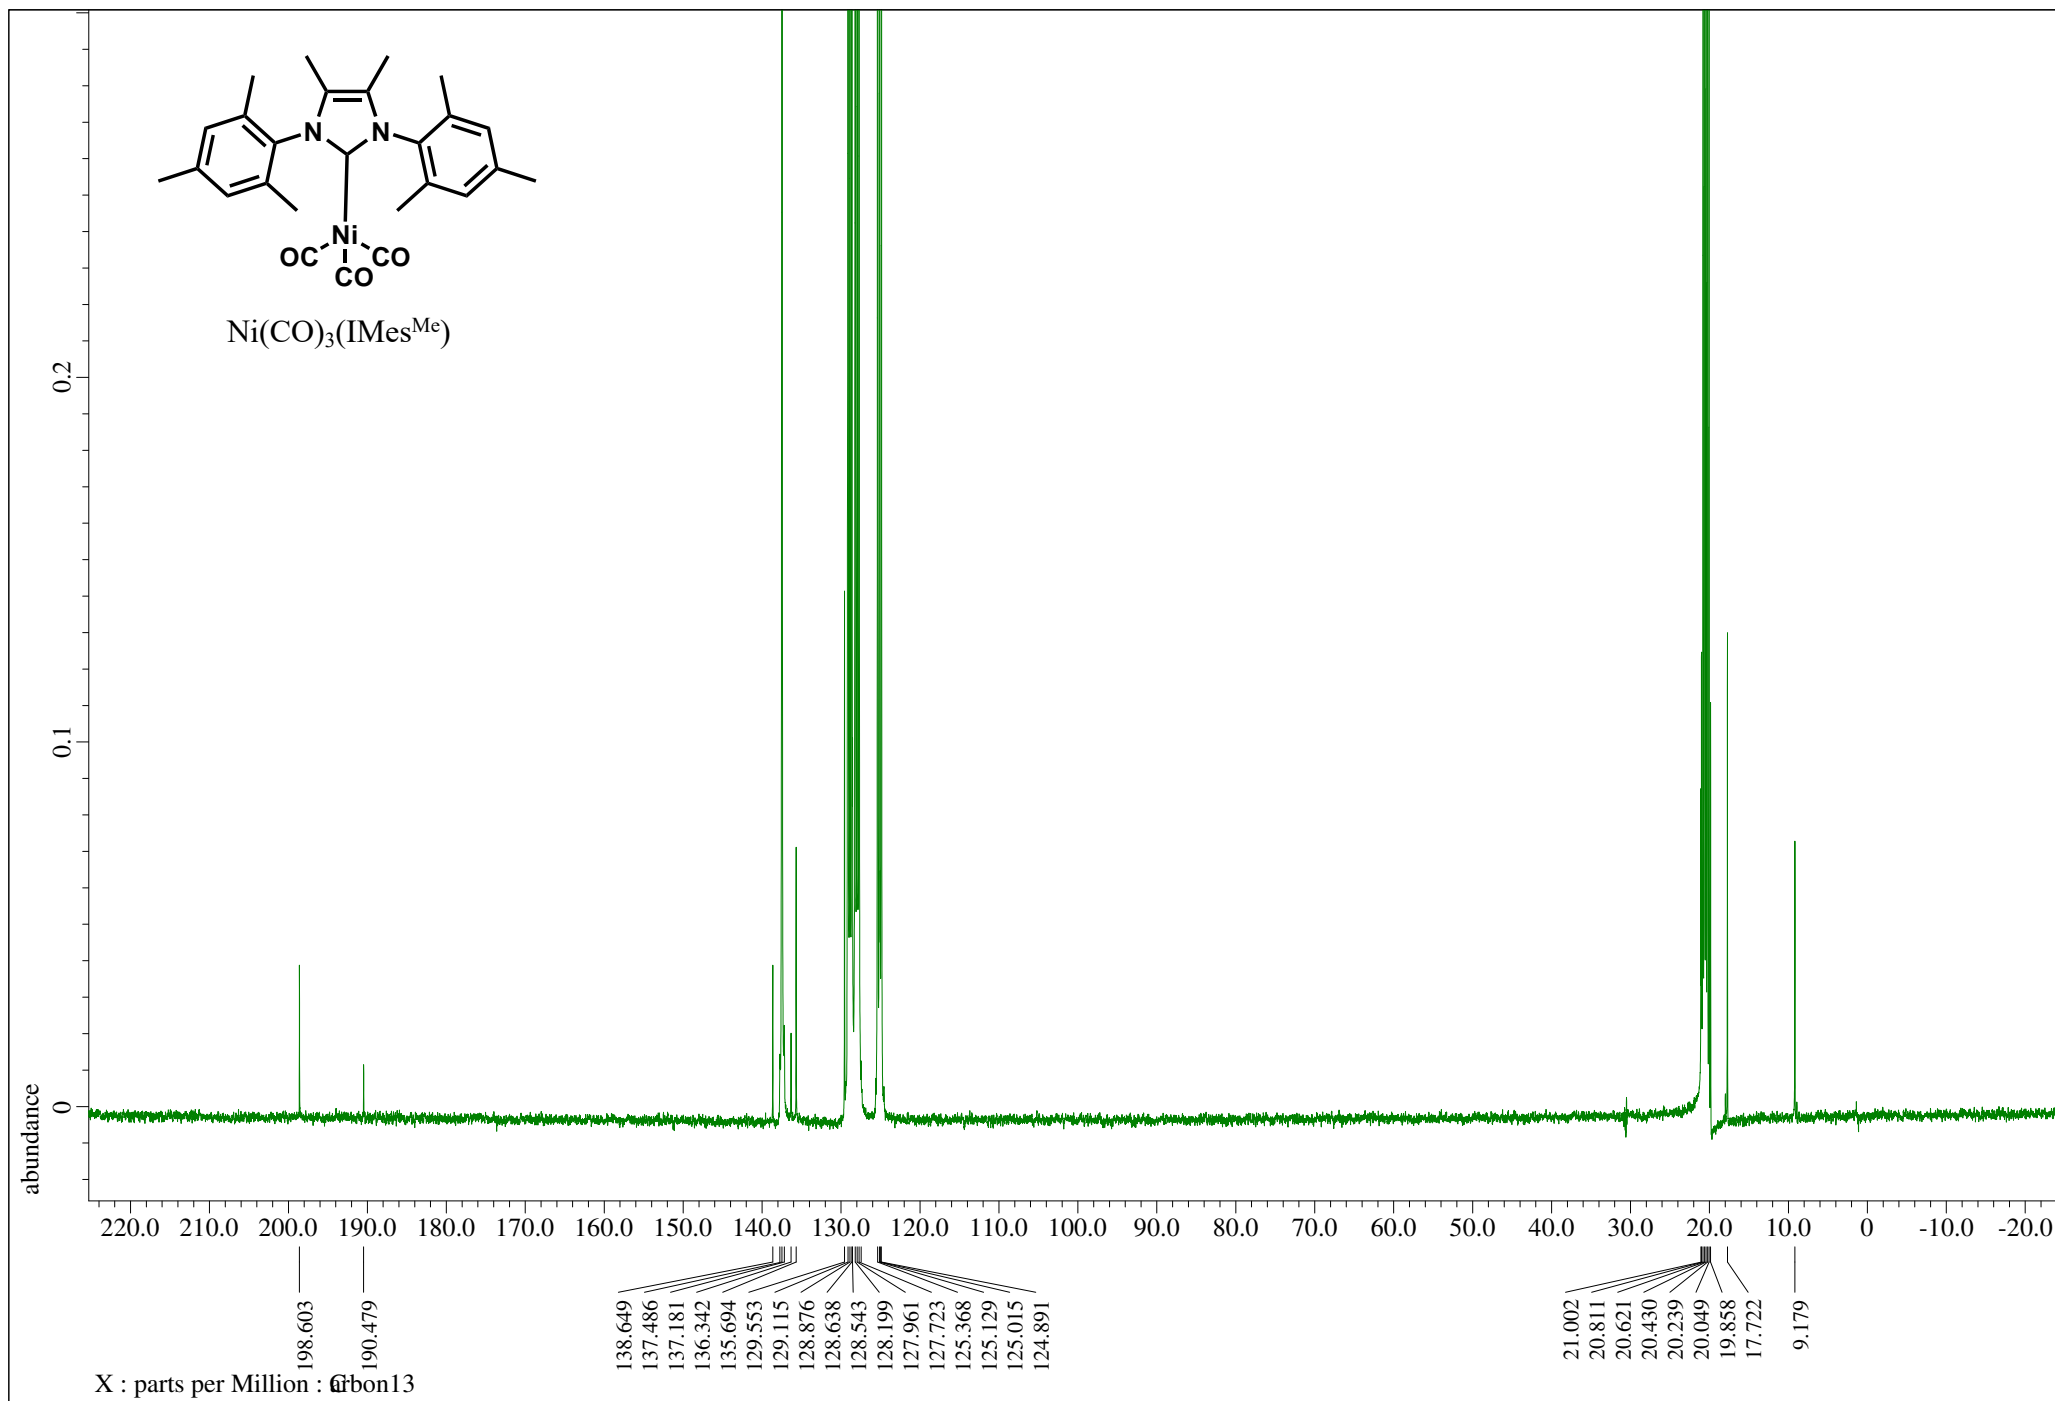

Supplement: d2sc01394k1.pdf [file d2sc01394k1.pdf]
